# Supplementary material for: Drought and climate change impacts on cooling water shortages and electricity prices in Great Britain
Source: Nat Commun. 2020 May 7;11:2239. doi: 10.1038/s41467-020-16012-2 (PMC7206141; doi:10.1038/s41467-020-16012-2)
Supplement: Supplementary file 4 — Source Data [file 41467_2020_16012_MOESM4_ESM.xlsx]

## Sheet: Figure_meta
Source data file for all figures:
Drought and climate change on cooling water shortages and electricity prices in Great Britain
Byers, E.A., Coxon, G., Freer, J., Hall, J.W.,
2020
Nature Communications
License: Creative Commons 4.0 CC BY-NC
Contact: byers@iiasa.ac.at
Date: 06-04-2020
Contents
Figure 2
Figure 3a
Figure 3b
Figure 3c
Figure 3d
Figure 4abc
Figure 4def
Figure 5abc full
Figure 5abc pcts
Figure 5d
Figure 5d pcts
Figure 5e
Figure 6a
Figure 6b
Figure 6c
Figure 7
Figure 8a
Figure 8b
Figure 9a
Figure 9b
Figure 9c

## Sheet: Figure2_data
Unnamed: 0	Baseline	Baseline.1	Baseline.2	Baseline.3	Baseline.4	Baseline.5	Baseline.6	Baseline.7	Baseline.8	Baseline.9	Baseline.10	Baseline.11	Baseline.12	Baseline.13	Baseline.14	Baseline.15	Baseline.16	Baseline.17	Baseline.18	Baseline.19	Baseline.20	Baseline.21	Baseline.22	Baseline.23	Baseline.24	Baseline.25	Baseline.26	Baseline.27	Baseline.28	Baseline.29	Baseline.30	Baseline.31	Baseline.32	Baseline.33	Baseline.34	Baseline.35	Baseline.36	Baseline.37	Baseline.38	Baseline.39	Baseline.40	Baseline.41	Baseline.42	Baseline.43	Baseline.44	Baseline.45	Baseline.46	Baseline.47	Baseline.48
	0	1	2	3	4	5	6	7	8	9	10	11	12	13	14	15	16	17	18	19	20	21	22	23	24	25	26	27	28	29	30	31	32	33	34	35	36	37	38	39	40	41	42	43	44	45	46	47	48
ppid
1.0	5.60099	1.29994	5.56215	4.85979	0.459722	5.09725	2.74415	5.58524	3.38057	4.21531	3.335	4.81121	3.85712	2.68157	4.09844	4.71838	2.14582	3.45709	5.35977	5.35017	3.37748	7.25916	1.94398	3.6495	3.83209	2.43022	3.52853	2.25762	1.79501	2.54888	2.26519	1.32613	5.1759	2.4694	3.23583	1.91472	6.17425	4.3182	2.36884	3.36703	2.63177	7.78234	2.2449	3.46702	3.1704	2.35178	4.33848	2.76609	3.35722
2.0	5.60099	1.29994	5.56215	4.85979	0.459722	5.09725	2.74415	5.58524	3.38057	4.21531	3.335	4.81121	3.85712	2.68157	4.09844	4.71838	2.14582	3.45709	5.35977	5.35017	3.37748	7.25916	1.94398	3.6495	3.83209	2.43022	3.52853	2.25762	1.79501	2.54888	2.26519	1.32613	5.1759	2.4694	3.23583	1.91472	6.17425	4.3182	2.36884	3.36703	2.63177	7.78234	2.2449	3.46702	3.1704	2.35178	4.33848	2.76609	3.35722
3.0	5.36435	4.09375	4.38403	4.2706	1.98634	3.74676	3.48171	6.15949	5.15694	5.18519	3.84907	4.52292	4.43958	3.16319	3.775	3.51759	3.27755	4.44606	3.25116	3.26181	3.07685	4.07338	2.66296	4.60301	3.30579	3.43056	5.57847	1.84259	3.81204	4.13356	3.61019	4.05903	4.85324	2.61875	2.44676	2.77986	3.73819	3.55394	3.74815	4.64699	3.27639	6.89236	4.44028	5.76528	3.08935	2.67431	3.90833	2.75463	4.26551
4.0	4.05648	2.8349	5.3891	4.78568	2.20819	4.73511	2.1	4.85591	4.17144	2.63746	3.34366	3.3604	5.00691	2.50684	3.14444	4.39338	2.5297	3.09587	4.65078	5.62507	2.97179	5.55769	3.59637	3.89202	3.84323	2.33134	3.37984	1.73084	2.04238	2.68953	2.63276	2.86375	5.07343	2.73162	2.58098	2.31752	4.22201	4.33276	3.70897	2.80833	4.2661	7.24665	2.86026	6.13832	2.01959	2.30207	4.61275	3.41425	4.74715
5.0	5.82037	3.86458	4.18657	4.65208	2.34954	3.67963	4.20069	5.56366	4.83773	4.75208	2.74676	3.65046	4.32407	4.15185	3.03727	3.40972	3.61065	3.59282	4.43634	3.58356	3.04838	4.39282	3.38356	4.65162	4.2169	3.775	4.84421	1.72523	3.70093	4.20023	3.45903	4.22037	5.56968	2.02894	2.61852	3.66505	3.80903	3.60255	3.91389	5.02708	3.97269	6.71829	4.88565	6.02315	2.08241	2.40787	3.53148	3.69005	4.65509
6.0	3.72014	4.0831	3.81157	5.62083	2.00069	4.09005	4.28032	7.1088	4.91597	5.31065	3.66551	3.35671	3.64259	4.12037	3.39977	3.56042	3.07477	4.10162	4.36134	3.88519	2.71134	4.57153	2.92662	5.18912	3.40787	3.13403	5.1	2.51204	4.53704	3.63843	3.7169	4.27037	4.91921	3.6669	3.11991	2.39329	3.43287	3.11829	4.26319	4.92778	3.81366	6.52407	3.28981	4.80324	3.4	3.25995	3.23866	2.44444	4.16065
7.0	5.5669	4.31806	4.03704	4.67269	1.74838	3.82523	2.7838	6.29421	5.02014	4.68565	3.93565	4.075	4.50347	4.34421	3.30625	4.32037	3.4412	3.71296	3.04259	4.46042	2.69606	4.90648	2.46481	3.67546	4.30093	3.83912	5.66273	2.8463	2.76157	4.59676	3.13171	2.69514	5.14954	2.88935	2.84954	2.88102	3.94884	4.06019	3.42176	3.64583	4.17963	7.68843	4.61505	5.95995	3.1912	3.24097	4.21088	3.00139	4.39468
8.0	5.39861	3.35185	5.07616	5.22963	1.61852	3.95509	3.10995	5.56481	4.75625	4.72639	3.05278	3.47477	4.21644	3.97963	2.83819	4.27569	3.46713	3.55509	3.6044	5.56551	3.59815	5.50949	3.28333	4.24005	4.84931	3.12569	5.14097	2.11042	2.98773	3.87153	2.52269	2.43819	4.67384	2.6662	2.48194	2.51736	3.9294	3.48935	3.56597	2.95694	4.00532	7.16343	4.5831	6.2544	2.29861	2.92014	5.35833	3.1162	4.52894
9.0	5.03618	5.73684	4.8125	3.22563	2.4682	5.21979	4.42885	6.29678	5.56944	5.5865	4.86343	5.11623	5.45139	3.71296	3.73611	3.14827	3.04471	5.44213	3.90412	3.19761	1.93068	6.23806	2.42678	4.83272	3.72892	4.31542	6.36562	2.32091	4.08772	4.35685	4.49744	2.37792	3.89815	2.90266	2.36903	3.59795	4.15838	3.43494	4.37208	5.48538	3.66228	6.8203	4.745	6.83163	2.86233	2.63414	4.29825	2.46235	4.16654
10.0	4.99187	5.69897	4.79949	3.21204	2.4643	5.18621	4.39527	6.243	5.53014	5.5464	4.83868	5.08776	5.40926	3.68858	3.72181	3.11842	3.03519	5.41286	3.91019	3.19547	1.92881	6.17027	2.41286	4.82685	3.71296	4.29259	6.31379	2.31708	4.05977	4.33477	4.48498	2.37459	3.88158	2.89218	2.35751	3.58405	4.13107	3.41944	4.33179	5.46965	3.63971	6.7394	4.72449	6.79218	2.85813	2.61512	4.27212	2.45792	4.13879
11.0	5.77037	4.27616	3.93264	4.88449	2.05301	3.9588	4.40463	6.74329	5.3625	5.02106	3.8956	4.34213	3.77523	3.53102	2.83611	4.0831	3.12292	4.76759	3.93565	3.12801	3.64977	3.87245	3.17662	5.92384	3.68819	3.37616	5.32454	2.18241	4.17199	3.59491	3.42083	5.08704	5.18958	2.61042	3.19838	1.97662	4.07731	3.23032	3.85903	5.67755	2.85787	6.3331	4.70718	5.62153	2.71273	2.54259	3.59144	3.18796	4.51829
12.0	5.36445	4.09307	4.3844	4.27015	1.98278	3.7485	3.47835	6.15925	5.16013	5.18369	3.84756	4.51913	4.43839	3.1634	3.77546	3.52097	3.27417	4.44465	3.24469	3.26028	3.07537	4.07428	2.6619	4.60022	3.30406	3.43178	5.5768	1.84184	3.81196	4.13351	3.60825	4.05453	4.85022	2.61799	2.44526	2.77669	3.73489	3.54997	3.74905	4.64297	3.27601	6.90475	4.43988	5.76791	3.08612	2.67579	3.90993	2.75157	4.26191
13.0	5.36491	4.094	4.38104	4.26951	1.98818	3.74595	3.48454	6.1603	5.15311	5.18411	3.85119	4.52431	4.44246	3.16435	3.77348	3.51835	3.27869	4.44544	3.25744	3.26339	3.07903	4.07432	2.66667	4.60309	3.30605	3.42849	5.57953	1.84681	3.81267	4.13492	3.61219	4.06126	4.85119	2.62078	2.44701	2.78646	3.74066	3.55737	3.74909	4.65162	3.27976	6.88533	4.44048	5.76166	3.09193	2.67601	3.90774	2.75422	4.26711
14.0	5.33389	3.37258	4.22111	5.29782	1.51187	3.42739	3.20692	5.74389	4.7647	4.61538	3.38188	2.95482	4.41661	3.95357	2.48016	4.65775	3.01487	3.61507	3.76892	5.37739	3.73861	5.17893	2.7196	4.51909	4.11614	3.35109	4.64615	2.42559	2.24283	4.03796	2.62056	2.70082	4.94334	2.75305	2.47857	2.72857	4.16384	3.53973	3.95864	3.08129	3.86824	8.16029	4.54272	6.3892	2.65683	2.79071	4.26105	3.27811	4.47752
15.0	4.72824	3.22569	5.40787	4.92361	1.39398	4.03981	2.31875	3.91829	3.53981	2.97037	4.00532	2.52245	4.1125	3.38333	3.45463	5.15231	2.7162	3.40231	3.97477	6.80787	3.08912	6.31875	3.46852	4.39444	4.33634	2.09954	3.98079	1.67454	2.50671	3.32338	2.45787	2.02708	4.75116	3.14051	2.42824	1.98032	3.99977	4.37222	3.86343	3.2919	3.80208	6.32153	3.15185	5.24907	2.51551	2.53565	4.61319	2.97014	4.09213
16.0	5.03355	3.56759	6.54872	3.27514	1.20954	3.69544	3.44786	5.12778	2.56054	2.97115	3.73269	4.69943	4.40036	3.11061	5.53348	4.69558	2.29644	4.95719	5.19274	5.67692	2.64209	7.1245	1.89537	5.48967	5.04801	2.58697	4.54088	2.92208	2.0651	3.41702	4.93996	1.80078	5.94751	3.29395	2.83056	2.02536	4.79537	4.33276	3.61766	3.60356	2.88013	7.34601	3.41154	5.45427	2.49117	3.15883	4.86346	3.04858	3.31175
17.0	5.05311	4.3066	4.21934	4.18501	2.15671	3.98305	3.58115	6.05573	5.15024	5.11679	3.60727	4.40479	4.53398	3.08307	3.77734	3.36487	3.05922	4.79935	3.27769	3.08063	3.07189	3.85142	2.54376	4.97624	3.35727	3.62727	5.47676	1.68536	4.11434	4.13374	3.87395	4.31184	4.73305	2.49275	2.53721	2.53284	3.50384	3.4358	3.84958	4.7051	3.03442	6.35142	4.49991	5.76572	3.02289	2.60098	3.64413	2.48969	4.14762
18.0	4.83542	3.96968	6.2456	3.28819	2.29884	3.44468	3.09815	5.48241	3.15	3.35856	4.60162	4.18542	4.3963	3.29491	4.85278	3.90069	2.65278	3.84259	6.15231	4.44792	2.42431	5.87963	3.11181	4.68912	4.79653	3.36458	4.725	3.05625	2.2375	3.99375	4.6419	2.29815	6.07755	3.70347	2.84259	3.10139	3.74815	4.19352	3.74606	2.91782	3.41204	6.85787	3.53171	6.28287	2.89074	3.18796	5.31412	3.87546	3.33125
19.0	5.59186	3.29673	4.75458	4.88088	1.39277	3.75517	2.86004	5.59454	4.62034	4.35922	3.67355	3.27026	4.71172	4.04864	3.07441	4.88235	3.02908	3.40507	3.46367	5.14497	3.37732	5.59017	2.97214	4.18631	4.34215	3.15857	4.77101	2.29487	2.3976	3.99317	2.72164	2.27417	4.80481	3.09246	2.531	2.28905	4.12614	4.05539	3.98887	3.33192	3.91873	8.12846	4.31363	5.99357	2.83099	2.95333	4.67103	2.98679	4.31881
20.0	5.09806	4.09361	4.03824	4.46935	2.12657	3.78278	3.51426	6.04167	5.17278	4.97981	3.91481	4.40741	4.18769	3.19009	3.56185	3.61741	3.27676	4.59407	3.29731	3.32944	3.25528	3.85213	2.93315	5.12102	3.23213	3.79602	5.54917	1.91583	3.77833	3.89361	3.465	4.33981	5.09639	2.62472	2.67306	2.46343	3.59269	3.37944	3.72324	4.76694	3.41685	6.93407	4.76685	5.51907	3.06398	2.69685	3.78185	2.88306	4.20833
21.0	5.74931	4.43727	4.09375	4.43634	2.07639	3.82315	3.52037	6.24421	5.16111	4.81389	3.9706	4.63148	4.04213	3.52708	3.19838	3.61667	3.50139	4.26134	3.47014	3.64792	3.35718	4.15486	2.73426	4.83981	3.58588	3.91134	5.44051	2.37338	3.66111	3.67546	3.19213	3.78981	5.08009	2.56134	2.99606	2.11227	4.03148	3.33264	3.73565	4.69699	3.89375	7.64537	4.92917	5.52963	2.98565	3.00208	3.91806	2.72199	4.3037
22.0	5.74931	4.43727	4.09375	4.43634	2.07639	3.82315	3.52037	6.24421	5.16111	4.81389	3.9706	4.63148	4.04213	3.52708	3.19838	3.61667	3.50139	4.26134	3.47014	3.64792	3.35718	4.15486	2.73426	4.83981	3.58588	3.91134	5.44051	2.37338	3.66111	3.67546	3.19213	3.78981	5.08009	2.56134	2.99606	2.11227	4.03148	3.33264	3.73565	4.69699	3.89375	7.64537	4.92917	5.52963	2.98565	3.00208	3.91806	2.72199	4.3037
23.0	5.71748	4.41336	4.07121	4.41755	2.06603	3.79982	3.49956	6.21109	5.13261	4.7845	3.94455	4.60384	4.01731	3.50705	3.18232	3.59491	3.49019	4.23754	3.45723	3.62919	3.34237	4.13404	2.72134	4.81548	3.56978	3.88801	5.4095	2.36232	3.63602	3.65542	3.17758	3.76653	5.05699	2.54519	2.98236	2.10527	4.01543	3.31944	3.7134	4.67218	3.87335	7.59491	4.89749	5.49383	2.97244	2.9871	3.8944	2.7069	4.28208
24.0	6.04296	4.27847	4.35894	4.84311	1.72675	3.82246	3.42539	6.30206	5.25377	4.5105	3.68314	4.20271	4.25464	3.95643	2.90883	3.9213	3.35844	4.04887	3.42835	4.30901	3.20054	4.48777	2.46321	4.43101	4.20969	3.95817	5.51848	2.74312	3.02276	4.23426	2.89974	3.18245	5.41259	2.37809	2.97463	2.6818	3.8614	3.38352	3.65882	4.08386	4.0379	7.7961	5.09507	5.99581	2.84176	3.05557	3.84228	3.20329	4.61011
25.0	4.64381	3.6514	5.16874	4.88505	3.05122	4.1512	2.28103	4.90544	4.12392	3.39687	3.03044	4.55615	4.68351	3.02926	3.66844	4.58028	2.93607	4.13534	5.71483	5.39056	2.96612	5.32122	3.67484	4.51281	4.4013	2.88633	5.26074	2.4607	2.62776	3.38593	3.12273	3.90307	5.93499	2.81511	2.9079	2.73306	3.56787	3.84003	3.74616	3.70193	4.43548	6.36101	4.36416	7.14066	2.47823	2.77857	4.61692	3.30388	5.33826
26.0	3.94976	2.92755	5.54601	4.83585	1.99863	4.55752	2.0344	5.05459	4.59734	2.43835	3.41228	3.25344	5.20916	2.38564	3.05405	4.59973	2.4057	3.0214	4.78566	5.66313	3.06932	5.85319	3.31893	3.72711	3.88853	2.25543	3.13374	1.71515	1.79912	2.47746	2.59185	2.64895	4.97122	2.65967	2.49529	2.14505	4.52679	4.29265	3.86358	2.70317	4.26452	8.00204	2.81631	6.86238	1.86385	2.10988	4.86575	3.39311	5.10159
27.0	6.04074	4.27708	4.35764	4.84167	1.72639	3.8213	3.42431	6.29977	5.25208	4.5088	3.68194	4.20139	4.25324	3.95509	2.90787	3.92014	3.35718	4.04769	3.42708	4.30787	3.19954	4.48634	2.4625	4.42963	4.2088	3.95694	5.51644	2.74213	3.02176	4.23287	2.89884	3.18171	5.41111	2.37708	2.97361	2.68102	3.86019	3.38241	3.65787	4.08264	4.03657	7.79421	5.09329	5.99421	2.84074	3.05463	3.8412	3.20231	4.60856
28.0	6.07667	4.29954	4.3788	4.865	1.73222	3.84009	3.44185	6.33685	5.27944	4.53639	3.7013	4.22287	4.27583	3.97676	2.92343	3.93889	3.37759	4.06685	3.44759	4.3263	3.21574	4.50954	2.47398	4.45204	4.22324	3.97685	5.54963	2.75824	3.03796	4.25546	2.91333	3.1937	5.43509	2.39343	2.99019	2.6937	3.87991	3.40037	3.67324	4.1025	4.05806	7.82481	5.12213	6.02009	2.85722	3.06991	3.8587	3.21815	4.63352
29.0	4.55542	3.61571	4.99622	4.80918	3.07192	4.00504	2.3006	4.70831	3.94185	3.36198	2.7009	4.64441	4.58934	3.13132	3.57711	4.549	3.05212	4.35602	5.8117	5.50497	2.7426	5.1471	3.46622	4.55241	4.33404	3.00498	5.57199	2.43891	2.62636	3.60321	3.43144	4.27663	6.0288	2.73545	2.87199	2.96559	3.31516	3.68611	3.56548	3.81398	4.35107	6.28029	4.46577	6.98658	2.60989	2.77402	4.48009	3.17852	5.29528
30.0	4.37937	5.85608	4.17632	5.24669	3.1795	3.80225	3.20913	5.38704	4.60278	4.54749	2.8172	3.58228	4.03611	3.79272	3.78466	4.53016	3.88929	4.59259	4.25833	3.66455	3.64193	4.37765	4.04048	3.90913	4.64563	4.41759	5.18082	2.41521	3.13122	4.78108	3.35225	4.61508	4.64167	2.55913	3.5172	3.97368	3.08122	4.61627	3.75807	4.82976	4.29616	6.82407	5.03439	5.59378	4.01667	2.68995	3.85952	3.26931	4.18942
31.0	4.03051	3.37925	5.57461	5.15703	2.6593	3.84024	1.9389	5.19763	4.12166	3.02854	3.12098	4.14132	4.5718	2.44968	3.28696	5.47435	2.80988	3.66181	5.23247	4.98179	3.62933	5.64815	3.50797	4.34252	4.26495	2.54743	4.11673	2.2144	2.24226	2.82734	2.67775	3.21281	5.50736	2.96008	2.71592	2.41985	4.12212	3.42646	4.09707	3.23421	4.31823	7.02846	4.05586	7.65035	1.76518	2.52763	5.03544	3.36453	5.83584
32.0	4.03843	3.38593	5.57898	5.16074	2.66269	3.84676	1.9475	5.20731	4.12759	3.04009	3.13046	4.14602	4.57907	2.4587	3.29389	5.47519	2.81204	3.66833	5.23491	4.98713	3.6363	5.65454	3.51694	4.34917	4.26676	2.55528	4.12528	2.21759	2.24602	2.83407	2.68176	3.22398	5.50806	2.96389	2.72083	2.42787	4.12389	3.4338	4.10093	3.24444	4.31667	7.02083	4.06398	7.64528	1.77361	2.53194	5.02935	3.37481	5.84333
[truncated: 251 more columns]

## Sheet: Figure3a_data
Unnamed: 0	Baseline	Near Future	Far Future
0	4402.52	0	-4.02153e-87
1	5039.94	-1.75739e+159	0
2	5153.38	-5.48613e+303	0
3	5253.39	-5.48613e+303	0
4	5599.76	8.73991e+245	0
5	5625.97	0	0
6	5694.13	0	0
7	5732.13	0	0
8	5757.44	0	1.62597e-260
9	5811.18	0	-5.48613e+303
10	5841.32	0	-5.48613e+303
11	5891.1	0	-5.48613e+303
12	5957.45	0	1.34498e-284
13	5976.11	6.40667e-145	0
14	6014.42	-5.48613e+303	0
15	6038.42	-5.48613e+303	0
16	6045.56	-8.37117e+298	0
17	6100.6	0	0
18	6164.24	0	0
19	6186.1	0	0
20	6252.64	0	-4.65661e-10
21	6258.63	-3.05176e-05	-5.48613e+303
22	6276.5	-5.39199e+67	-5.48613e+303
23	6278.49	-5.39199e+67	-4.02153e-87
24	6292.33	-5.39199e+67	0
25	6312.58	-5.39199e+67	0
26	6326.02	-5.48613e+303	0
27	6355.26	-5.48613e+303	0
28	6399.29	-5.48613e+303	0
29	6568.61	8.73991e+245	0
30	6569.04	0	0
31	6625.08	0	0
32	6629.73	0	-5.48613e+303
33	6657.99	-5.48613e+303	-5.48613e+303
34	6680.66	-5.48613e+303	-5.48613e+303
35	6704.47	-5.48613e+303	1.34498e-284
36	6707.87	-5.48613e+303	0
37	6764.49	-5.48613e+303	0
38	6804.85	-5.48613e+303	0
39	6877.04	-5.48613e+303	0
40	6902.69	-5.48613e+303	0
41	6925.43	-8.37117e+298	0
42	6930.13	0	0
43	6938.6	0	0
44	6966.42	0	-5.48613e+303
45	6972.34	-5.48613e+303	-5.48613e+303
46	6983.16	-5.48613e+303	-4.02153e-87
47	6985.28	-5.48613e+303	0
48	6989.17	-5.48613e+303	0
49	6999.13	-5.48613e+303	0
50	7004.75	-5.48613e+303	0
51	7010.48	-5.48613e+303	0
52	7017.11	-5.48613e+303	0
53	7051.43	-5.48613e+303	0
54	7052.67	0	0
55	7055.26	0	0
56	7071.86	0	-1.02064e-202
57	7085.32	-5.48613e+303	-5.48613e+303
58	7135.63	-5.48613e+303	1.34498e-284
59	7157.47	-5.48613e+303	0
60	7169.11	-5.48613e+303	0
61	7179.93	-5.48613e+303	0
62	7193.43	-5.48613e+303	0
63	7243.3	-5.48613e+303	0
64	7256.39	-5.48613e+303	0
65	7260.84	-5.48613e+303	0
66	7273.71	0	0
67	7277.48	0	0
68	7288.13	0	7.29112e-304
69	7333.71	-2.46006e+260	4.09174e+149
70	7344.36	-5.48613e+303	0
71	7345.72	-5.48613e+303	0
72	7357.02	-5.48613e+303	0
73	7371.28	-5.48613e+303	0
74	7380.37	-5.48613e+303	0
75	7474.33	-5.48613e+303	0
76	7506.73	-5.48613e+303	0
77	7525.09	-4.02153e-87	0
78	7538.83	0	0
79	7584.29	0	0
80	7669.11	0	0
81	7728.29	8.81443e-280	0
82	7737.5	4.57671e-246	0
83	7795.48	4.57671e-246	0
84	7930.6	4.57671e-246	0
85	7932.07	6.68887e-198	0
86	7946.16	-5.48613e+303	0
87	7976.8	-5.48613e+303	0
88	7992.02	-5.48613e+303	2.45886e+198
89	8012.33	1.34498e-284	3.12174e-305
90	8073.93	0	0
91	8111.44	0	0
92	8124.81	0	7.78025e-143
93	8128.85	0	3.80985e+180
94	8160.29	0	5.55604e+180
95	8413.75	0	4.50622e-144
96	8821.8	0	1.16097e-28
97	8944.2	-4.65661e-10	5.03038e+175
98	9325.84	-5.48613e+303	1.17469e+214
99	10248.1	-5.48613e+303	6.96742e+252

## Sheet: Figure3b_data
Unnamed: 0	Baseline	Near Future	Far Future
0	4402.52	0	-4.02153e-87
1	5039.94	-1.75739e+159	0
2	5153.38	-5.48613e+303	0
3	5253.39	-5.48613e+303	0
4	5599.76	8.73991e+245	0
5	5625.97	0	0
6	5694.13	0	0
7	5732.13	0	0
8	5757.44	0	1.62597e-260
9	5811.18	0	-5.48613e+303
10	5841.32	0	-5.48613e+303
11	5891.1	0	-5.48613e+303
12	5957.45	0	1.34498e-284
13	5976.11	6.40667e-145	0
14	6014.42	-5.48613e+303	0
15	6038.42	-5.48613e+303	0
16	6045.56	-8.37117e+298	0
17	6100.6	0	0
18	6164.24	0	0
19	6186.1	0	0
20	6252.64	0	-4.65661e-10
21	6258.63	-3.05176e-05	-5.48613e+303
22	6276.5	-5.39199e+67	-5.48613e+303
23	6278.49	-5.39199e+67	-4.02153e-87
24	6292.33	-5.39199e+67	0
25	6312.58	-5.39199e+67	0
26	6326.02	-5.48613e+303	0
27	6355.26	-5.48613e+303	0
28	6399.29	-5.48613e+303	0
29	6568.61	8.73991e+245	0
30	6569.04	0	0
31	6625.08	0	0
32	6629.73	0	-5.48613e+303
33	6657.99	-5.48613e+303	-5.48613e+303
34	6680.66	-5.48613e+303	-5.48613e+303
35	6704.47	-5.48613e+303	1.34498e-284
36	6707.87	-5.48613e+303	0
37	6764.49	-5.48613e+303	0
38	6804.85	-5.48613e+303	0
39	6877.04	-5.48613e+303	0
40	6902.69	-5.48613e+303	0
41	6925.43	-8.37117e+298	0
42	6930.13	0	0
43	6938.6	0	0
44	6966.42	0	-5.48613e+303
45	6972.34	-5.48613e+303	-5.48613e+303
46	6983.16	-5.48613e+303	-4.02153e-87
47	6985.28	-5.48613e+303	0
48	6989.17	-5.48613e+303	0
49	6999.13	-5.48613e+303	0
50	7004.75	-5.48613e+303	0
51	7010.48	-5.48613e+303	0
52	7017.11	-5.48613e+303	0
53	7051.43	-5.48613e+303	0
54	7052.67	0	0
55	7055.26	0	0
56	7071.86	0	-1.02064e-202
57	7085.32	-5.48613e+303	-5.48613e+303
58	7135.63	-5.48613e+303	1.34498e-284
59	7157.47	-5.48613e+303	0
60	7169.11	-5.48613e+303	0
61	7179.93	-5.48613e+303	0
62	7193.43	-5.48613e+303	0
63	7243.3	-5.48613e+303	0
64	7256.39	-5.48613e+303	0
65	7260.84	-5.48613e+303	0
66	7273.71	0	0
67	7277.48	0	0
68	7288.13	0	7.29112e-304
69	7333.71	-2.46006e+260	4.09174e+149
70	7344.36	-5.48613e+303	0
71	7345.72	-5.48613e+303	0
72	7357.02	-5.48613e+303	0
73	7371.28	-5.48613e+303	0
74	7380.37	-5.48613e+303	0
75	7474.33	-5.48613e+303	0
76	7506.73	-5.48613e+303	0
77	7525.09	-4.02153e-87	0
78	7538.83	0	0
79	7584.29	0	0
80	7669.11	0	0
81	7728.29	8.81443e-280	0
82	7737.5	4.57671e-246	0
83	7795.48	4.57671e-246	0
84	7930.6	4.57671e-246	0
85	7932.07	6.68887e-198	0
86	7946.16	-5.48613e+303	0
87	7976.8	-5.48613e+303	0
88	7992.02	-5.48613e+303	2.45886e+198
89	8012.33	1.34498e-284	3.12174e-305
90	8073.93	0	0
91	8111.44	0	0
92	8124.81	0	7.78025e-143
93	8128.85	0	3.80985e+180
94	8160.29	0	5.55604e+180
95	8413.75	0	4.50622e-144
96	8821.8	0	1.16097e-28
97	8944.2	-4.65661e-10	5.03038e+175
98	9325.84	-5.48613e+303	1.17469e+214
99	10248.1	-5.48613e+303	6.96742e+252

## Sheet: Figure3c_data
Unnamed: 0	Baseline	Baseline.1	Baseline.2	Baseline.3	Baseline.4	Baseline.5	Baseline.6	Baseline.7	Baseline.8	Baseline.9	Baseline.10	Near Future	Near Future.1	Near Future.2	Near Future.3	Near Future.4	Near Future.5	Near Future.6	Near Future.7	Near Future.8	Near Future.9	Near Future.10	Far Future	Far Future.1	Far Future.2	Far Future.3	Far Future.4	Far Future.5	Far Future.6	Far Future.7	Far Future.8	Far Future.9	Far Future.10
	5	10	20	30	40	50	60	70	80	90	95	5	10	20	30	40	50	60	70	80	90	95	5	10	20	30	40	50	60	70	80	90	95
0	0	0	0	0	0	0	0	0	0	0	0	0	0	0	0	0	0	0	0	0	0	0	0	0	0	0	0	0	0	0	0	0	0
1	0	0	0	0	0	0	0	0	0	0	0	0	0	0	0	0	0	0	0	0	0	0	0	0	0	0	0	0	0	0	0	0	0
2	0	0	0	0	0	0	0	0	0	0	0	0	0	0	0	0	0	0	0	0	0	0	0	0	0	0	0	0	0	0	0	0	0
3	0	0	0	0	0	0	0	0	0	0	0	0	0	0	0	0	0	0	0	0	0	0	0	0	0	0	0	0	0	0	0	0	0
4	0	0	0	0	0	0	0	0	0	0	0	0	0	0	0	0	0	0	0	0	0	0	0	0	0	0	0	0	0	0	0	0	0
5	0	0	0	0	0	0	0	0	0	0	0	0	0	0	0	0	0	0	0	0	0	0	0	0	0	0	0	0	0	0	0	0	0
6	0	0	0	0	0	0	0	0	0	0	0	0	0	0	0	0	0	0	0	0	0	0	0	0	0	0	0	0	0	0	0	0	0
7	0	0	0	0	0	0	0	0	0	0	0	0	0	0	0	0	0	0	0	0	0	0	0	0	0	0	0	0	0	0	0	0	0
8	0	0	0	0	0	0	0	0	0	0	0	0	0	0	0	0	0	0	0	0	0	0	0	0	0	0	0	0	0	0	0	0	0
9	0	0	0	0	0	0	0	0	0	0	0	0	0	0	0	0	0	0	0	0	0	0	0	0	0	0	0	0	0	0	0	0	0
10	0	0	0	0	0	0	0	0	0	0	0	0	0	0	0	0	0	0	0	0	0	0	0	0	0	0	0	0	0	0	0	0	0
11	0	0	0	0	0	0	0	0	0	0	0	0	0	0	0	0	0	0	0	0	0	0	0	0	0	0	0	0	0	0	0	0	0
12	0	0	0	0	0	0	0	0	0	0	0	0	0	0	0	0	0	0	0	0	0	0	0	0	0	0	0	0	0	0	0	0	0
13	0	0	0	0	0	0	0	0	0	0	0	0	0	0	0	0	0	0	0	0	0	0	0	0	0	0	0	0	0	0	0	0	0
14	0	0	0	0	0	0	0	0	0	0	0	0	0	0	0	0	0	0	0	0	0	0	0	0	0	0	0	0	0	0	0	0	0
15	0	0	0	0	0	0	0	0	0	0	0	0	0	0	0	0	0	0	0	0	0	0	0	0	0	0	0	0	0	0	0	0	0
16	0	0	0	0	0	0	0	0	0	0	0	0	0	0	0	0	0	0	0	0	0	0	0	0	0	0	0	0	0	0	0	0	0
17	0	0	0	0	0	0	0	0	0	0	0	0	0	0	0	0	0	0	0	0	0	0	0	0	0	0	0	0	0	0	0	0	0
18	0	0	0	0	0	0	0	0	0	0	0	0	0	0	0	0	0	0	0	0	0	0	0	0	0	0	0	0	0	0	0	0	0
19	0	0	0	0	0	0	0	0	0	0	0	0	0	0	0	0	0	0	0	0	0	0	0	0	0	0	0	0	0	0	0	0	0
20	0	0	0	0	0	0	0	0	0	0	0	0	0	0	0	0	0	0	0	0	0	0	0	0	0	0	0	0	0	0	0	0	0
21	0	0	0	0	0	0	0	0	0	0	0	0	0	0	0	0	0	0	0	0	0	0	0	0	0	0	0	0	0	0	0	0	0
22	0	0	0	0	0	0	0	0	0	0	0	0	0	0	0	0	0	0	0	0	0	0	0	0	0	0	0	0	0	0	0	0	0
23	0	0	0	0	0	0	0	0	0	0	0	0	0	0	0	0	0	0	0	0	0	0	0	0	0	0	0	0	0	0	0	0	0
24	0	0	0	0	0	0	0	0	0	0	0	0	0	0	0	0	0	0	0	0	0	0	0	0	0	0	0	0	0	0	0	0	0
25	0	0	0	0	0	0	0	0	0	0	0	0	0	0	0	0	0	0	0	0	0	0	0	0	0	0	0	0	0	0	0	0	0
26	0	0	0	0	0	0	0	0	0	0	0	0	0	0	0	0	0	0	0	0	0	0	0	0	0	0	0	0	0	0	0	0	0
27	0	0	0	0	0	0	0	0	0	0	0	0	0	0	0	0	0	0	0	0	0	0	0	0	0	0	0	0	0	0	0	0	0
28	0	0	0	0	0	0	0	0	0	0	0	0	0	0	0	0	0	0	0	0	0	0	0	0	0	0	0	0	0	0	0	0	0
29	0	0	0	0	0	0	0	0	0	0	0	0	0	0	0	0	0	0	0	0	0	0	0	0	0	0	0	0	0	0	0	0	0
30	0	0	0	0	0	0	0	0	0	0	0	0	0	0	0	0	0	0	0	0	0	0	0	0	0	0	0	0	0	0	0	0	0
31	0	0	0	0	0	0	0	0	0	0	0	0	0	0	0	0	0	0	0	0	0	0	0	0	0	0	0	0	0	0	0	0	0
32	0	0	0	0	0	0	0	0	0	0	0	0	0	0	0	0	0	0	0	0	0	0	0	0	0	0	0	0	0	0	0	0	0
33	0	0	0	0	0	0	0	0	0	0	0	0	0	0	0	0	0	0	0	0	0	0	0	0	0	0	0	0	0	0	0	0	0
34	0	0	0	0	0	0	0	0	0	0	0	0	0	0	0	0	0	0	0	0	0	0	0	0	0	0	0	0	0	0	0	0	0
35	0	0	0	0	0	0	0	0	0	0	0	0	0	0	0	0	0	0	0	0	0	0	0	0	0	0	0	0	0	0	0	0	0
36	0	0	0	0	0	0	0	0	0	0	0	0	0	0	0	0	0	0	0	0	0	0	0	0	0	0	0	0	0	0	0	0	0
37	0	0	0	0	0	0	0	0	0	0	0	0	0	0	0	0	0	0	0	0	0	0	0	0	0	0	0	0	0	0	0	0	0
38	0	0	0	0	0	0	0	0	0	0	0	0	0	0	0	0	0	0	0	0	0	0	0	0	0	0	0	0	0	0	0	0	0
39	0	0	0	0	0	0	0	0	0	0	0	0	0	0	0	0	0	0	0	0	0	0	0	0	0	0	0	0	0	0	0	0	0
40	0	0	0	0	0	0	0	0	0	0	0	0	0	0	0	0	0	0	0	0	0	0	0	0	0	0	0	0	0	0	0	0	0
41	0	0	0	0	0	0	0	0	0	0	0	0	0	0	0	0	0	0	0	0	0	0	0	0	0	0	0	0	0	0	0	0	0
42	0	0	0	0	0	0	0	0	0	0	0	0	0	0	0	0	0	0	0	0	0	0	0	0	0	0	0	0	0	0	0	0	0
43	0	0	0	0	0	0	0	0	0	0	0	0	0	0	0	0	0	0	0	0	0	0	0	0	0	0	0	0	0	0	0	0	0
44	0	0	0	0	0	0	0	0	0	0	0	0	0	0	0	0	0	0	0	0	0	0	0	0	0	0	0	0	0	0	0	0	0
45	0	0	0	0	0	0	0	0	0	0	0	0	0	0	0	0	0	0	0	0	0	0	0	0	0	0	0	0	0	0	0	0	0
46	0	0	0	0	0	0	0	0	0	0	0	0	0	0	0	0	0	0	0	0	0	0	0	0	0	0	0	0	0	0	0	0	0
47	0	0	0	0	0	0	0	0	0	0	0	0	0	0	0	0	0	0	0	0	0	0	0	0	0	0	0	0	0	0	0	0	0
48	0	0	0	0	0	0	0	0	0	0	0	0	0	0	0	0	0	0	0	0	0	0	0	0	0	0	0	0	0	0	0	0	0
49	0	0	0	0	0	0	0	0	0	0	0	0	0	0	0	0	0	0	0	0	0	0	0	0	0	0	0	0	0	0	0	0	0
50	0	0	0	0	0	0	0	0	0	0	0	0	0	0	0	0	0	0	0	0	0	0	0	0	0	0	0	0	0	0	0	0	0
51	0	0	0	0	0	0	0	0	0	0	0	0	0	0	0	0	0	0	0	0	0	0	0	0	0	0	0	0	0	0	0	0	0
52	0	0	0	0	0	0	0	0	0	0	0	0	0	0	0	0	0	0	0	0	0	0	0	0	0	0	0	0	0	0	0	0	0
53	0	0	0	0	0	0	0	0	0	0	0	0	0	0	0	0	0	0	0	0	0	0	0	0	0	0	0	0	0	0	0	0	0
54	0	0	0	0	0	0	0	0	0	0	0	0	0	0	0	0	0	0	0	0	0	0	0	0	0	0	0	0	0	0	0	0	0
55	0	0	0	0	0	0	0	0	0	0	0	0	0	0	0	0	0	0	0	0	0	0	0	0	0	0	0	0	0	0	0	0	0
56	0	0	0	0	0	0	0	0	0	0	0	0	0	0	0	0	0	0	0	0	0	0	0	0	0	0	0	0	0	0	0	0	0
57	0	0	0	0	0	0	0	0	0	0	0	0	0	0	0	0	0	0	0	0	0	0	0	0	0	0	0	0	0	0	0	0	0
58	0	0	0	0	0	0	0	0	0	0	0	0	0	0	0	0	0	0	0	0	0	0	0	0	0	0	0	0	0	0	0	0	0
59	0	0	0	0	0	0	0	0	0	0	0	0	0	0	0	0	0	0	0	0	0	0	0	0	0	0	0	0	0	0	0	0	0
60	0	0	0	0	0	0	0	0	0	0	0	0	0	0	0	0	0	0	0	0	0	0	0	0	0	0	0	0	0	0	0	0	0
61	0	0	0	0	0	0	0	0	0	0	0	0	0	0	0	0	0	0	0	0	0	0	0	0	0	0	0	0	0	0	0	0	0
62	0	0	0	0	0	0	0	0	0	0	0	0	0	0	0	0	0	0	0	0	0	0	0	0	0	0	0	0	0	0	0	0	0
63	0	0	0	0	0	0	0	0	0	0	0	0	0	0	0	0	0	0	0	0	0	0	0	0	0	0	0	0	0	0	0	0	0
64	0	0	0	0	0	0	0	0	0	0	0	0	0	0	0	0	0	0	0	0	0	0	0	0	0	0	0	0	0	0	0	0	0
65	0	0	0	0	0	0	0	0	0	0	0	0	0	0	0	0	0	0	0	0	0	0	0	0	0	0	0	0	0	0	0	0	0
66	0	0	0	0	0	0	0	0	0	0	0	0	0	0	0	0	0	0	0	0	0	0	0	0	0	0	0	0	0	0	0	0	0
67	0	0	0	0	0	0	0	0	0	0	0	0	0	0	0	0	0	0	0	0	0	0	0	0	0	0	0	0	0	0	0	0	0
68	0	0	0	0	0	0	0	0	0	0	0	0	0	0	0	0	0	0	0	0	0	0	0	0	0	0	0	0	0	0	0	0	0
69	0	0	0	0	0	0	0	0	0	0	0	0	0	0	0	0	0	0	0	0	0	0	0	0	0	0	0	0	0	0	0	0	0
70	0	0	0	0	0	0	0	0	0	0	0	0	0	0	0	0	0	0	0	0	0	0	0	0	0	0	0	0	0	0	0	0	0
71	0	0	0	0	0	0	0	0	0	0	0	0	0	0	0	0	0	0	0	0	0	0	0	0	0	0	0	0	0	0	0	0	0
72	0	0	0	0	0	0	0	0	0	0	0	0	0	0	0	0	0	0	0	0	0	0	0	0	0	0	0	0	0	0	0	0	0
73	0	0	0	0	0	0	0	0	0	0	0	0	0	0	0	0	0	0	0	0	0	0	0	0	0	0	0	0	0	0	0	0	0
74	0	0	0	0	0	0	0	0	0	0	0	0	0	0	0	0	0	0	0	0	0	0	0	0	0	0	0	0	0	0	0	0	0
75	0	0	0	0	0	0	0	0	0	0	0	0	0	0	0	0	0	0	0	0	0	0	0	0	0	0	0	0	0	0	0	0	0
76	0	0	0	0	0	0	0	0	0	0	0	0	0	0	0	0	0	0	0	0	0	0	0	0	0	0	0	0	0	0	0	0	0
77	0	0	0	0	0	0	0	0	0	0	0	0	0	0	0	0	0	0	0	0	0	0	0	0	0	0	0	0	0	0	0	0	0
78	0	0	0	0	0	0	0	0	0	0	0	0	0	0	0	0	0	0	0	0	0	0	0	0	0	0	0	0	0	0	0	0	0
79	0	0	0	0	0	0	0	0	0	0	0	0	0	0	0	0	0	0	0	0	0	0	0	0	0	0	0	0	0	0	0	0	0
80	0	0	0	0	0	0	0	0	0	0	0	0	0	0	0	0	0	0	0	0	0	0	0	0	0	0	0	0	0	0	0	0	0
81	0	0	0	0	0	0	0	0	0	0	0	0	0	0	0	0	0	0	0	0	0	0	0	0	0	0	0	0	0	0	0	0	0
82	0	0	0	0	0	0	0	0	0	0	0	0	0	0	0	0	0	0	0	0	0	0	0	0	0	0	0	0	0	0	0	0	0
83	0	0	0	0	0	0	0	0	0	0	0	0	0	0	0	0	0	0	0	0	0	0	0	0	0	0	0	0	0	0	0	0	0
84	0	0	0	0	0	0	0	0	0	0	0	0	0	0	0	0	0	0	0	0	0	0	0	0	0	0	0	0	0	0	0	0	0
85	0	0	0	0	0	0	0	0	0	0	0	0	0	0	0	0	0	0	0	0	0	0	0	0	0	0	0	0	0	0	0	0	0
86	0	0	0	0	0	0	0	0	0	0	0	0	0	0	0	0	0	0	0	0	0	0	0	0	0	0	0	0	0	0	0	0	0
87	0	0	0	0	0	0	0	0	0	0	0	0	0	0	0	0	0	0	0	0	0	0	0	0	0	0	0	0	0	0	0	0	0
88	0	0	0	0	0	0	0	0	0	0	0	0	0	0	0	0	0	0	0	0	0	0	0	0	0	0	0	0	0	0	0	0	0
89	0	0	0	0	0	0	0	0	0	0	0	0	0	0	0	0	0	0	0	0	0	0	0	0	0	0	0	0	0	0	0	0	0
90	0	0	0	0	0	0	0	0	0	0	0	0	0	0	0	0	0	0	0	0	0	0	0	0	0	0	0	0	0	0	0	0	0
91	0	0	0	0	0	0	0	0	0	0	0	0	0	0	0	0	0	0	0	0	0	0	0	0	0	0	0	0	0	0	0	0	0
92	0	0	0	0	0	0	0	0	0	0	0	0	0	0	0	0	0	0	0	0	0	0	0	0	0	0	0	0	0	0	0	0	0
93	0	0	0	0	0	0	0	0	0	0	0	0	0	0	0	0	0	0	0	0	0	0	0	0	0	0	0	0	0	0	0	0	0
94	0	0	0	0	0	0	0	0	0	0	0	0	0	0	0	0	0	0	0	0	0	0	0	0	0	0	0	0	0	0	0	0	0
95	0	0	0	0	0	0	0	0	0	0	0	0	0	0	0	0	0	0	0	0	0	0	0	0	0	0	0	0	0	0	0	0	0
96	0	0	0	0	0	0	0	0	0	0	0	0	0	0	0	0	0	0	0	0	0	0	0	0	0	0	0	0	0	0	0	0	0
97	0	0	0	0	0	0	0	0	0	0	0	0	0	0	0	0	0	0	0	0	0	0	0	0	0	0	0	0	0	0	0	0	0
98	0	0	0	0	0	0	0	0	0	0	0	0	0	0	0	0	0	0	0	0	0	0	0	0	0	0	0	0	0	0	0	0	0
99	0	0	0	0	0	0	0	0	0	0	0	0	0	0	0	0	0	0	0	0	0	0	0	0	0	0	0	0	0	0	0	0	0
100	0	0	0	0	0	0	0	0	0	0	0	0	0	0	0	0	0	0	0	0	0	0	0	0	0	0	0	0	0	0	0	0	0
101	0	0	0	0	0	0	0	0	0	0	0	0	0	0	0	0	0	0	0	0	0	0	0	0	0	0	0	0	0	0	0	0	0
102	0	0	0	0	0	0	0	0	0	0	0	0	0	0	0	0	0	0	0	0	0	0	0	0	0	0	0	0	0	0	0	0	0
103	0	0	0	0	0	0	0	0	0	0	0	0	0	0	0	0	0	0	0	0	0	0	0	0	0	0	0	0	0	0	0	0	0
104	0	0	0	0	0	0	0	0	0	0	0	0	0	0	0	0	0	0	0	0	0	0	0	0	0	0	0	0	0	0	0	0	0
105	0	0	0	0	0	0	0	0	0	0	0	0	0	0	0	0	0	0	0	0	0	0	0	0	0	0	0	0	0	0	0	0	0
106	0	0	0	0	0	0	0	0	0	0	0	0	0	0	0	0	0	0	0	0	0	0	0	0	0	0	0	0	0	0	0	0	0
107	0	0	0	0	0	0	0	0	0	0	0	0	0	0	0	0	0	0	0	0	0	0	0	0	0	0	0	0	0	0	0	0	0
108	0	0	0	0	0	0	0	0	0	0	0	0	0	0	0	0	0	0	0	0	0	0	0	0	0	0	0	0	0	0	0	0	0
109	0	0	0	0	0	0	0	0	0	0	0	0	0	0	0	0	0	0	0	0	0	0	0	0	0	0	0	0	0	0	0	0	0
110	0	0	0	0	0	0	0	0	0	0	0	0	0	0	0	0	0	0	0	0	0	0	0	0	0	0	0	0	0	0	0	0	0
111	0	0	0	0	0	0	0	0	0	0	0	0	0	0	0	0	0	0	0	0	0	0	0	0	0	0	0	0	0	0	0	0	0
112	0	0	0	0	0	0	0	0	0	0	0	0	0	0	0	0	0	0	0	0	0	0	0	0	0	0	0	0	0	0	0	0	0
113	0	0	0	0	0	0	0	0	0	0	0	0	0	0	0	0	0	0	0	0	0	0	0	0	0	0	0	0	0	0	0	0	0
114	0	0	0	0	0	0	0	0	0	0	0	0	0	0	0	0	0	0	0	0	0	0	0	0	0	0	0	0	0	0	0	0	0
115	0	0	0	0	0	0	0	0	0	0	0	0	0	0	0	0	0	0	0	0	0	0	0	0	0	0	0	0	0	0	0	0	0
116	0	0	0	0	0	0	0	0	0	0	0	0	0	0	0	0	0	0	0	0	0	0	0	0	0	0	0	0	0	0	0	0	0
117	0	0	0	0	0	0	0	0	0	0	0	0	0	0	0	0	0	0	0	0	0	0	0	0	0	0	0	0	0	0	0	0	0
118	0	0	0	0	0	0	0	0	0	0	0	0	0	0	0	0	0	0	0	0	0	0	0	0	0	0	0	0	0	0	0	0	0
119	0	0	0	0	0	0	0	0	0	0	0	0	0	0	0	0	0	0	0	0	0	0	0	0	0	0	0	0	0	0	0	0	0
120	0	0	0	0	0	0	0	0	0	0	0	0	0	0	0	0	0	0	0	0	0	0	0	0	0	0	0	0	0	0	0	0	0
121	0	0	0	0	0	0	0	0	0	0	0	0	0	0	0	0	0	0	0	0	0	0	0	0	0	0	0	0	0	0	0	0	0
122	0	0	0	0	0	0	0	0	0	0	0	0	0	0	0	0	0	0	0	0	0	0	0	0	0	0	0	0	0	0	0	0	0
123	0	0	0	0	0	0	0	0	0	0	0	0	0	0	0	0	0	0	0	0	0	0	0	0	0	0	0	0	0	0	0	0	0
124	0	0	0	0	0	0	0	0	0	0	0	0	0	0	0	0	0	0	0	0	0	0	0	0	0	0	0	0	0	0	0	0	0
125	0	0	0	0	0	0	0	0	0	0	0	0	0	0	0	0	0	0	0	0	0	0	0	0	0	0	0	0	0	0	0	0	0
126	0	0	0	0	0	0	0	0	0	0	0	0	0	0	0	0	0	0	0	0	0	0	0	0	0	0	0	0	0	0	0	0	0
127	0	0	0	0	0	0	0	0	0	0	0	0	0	0	0	0	0	0	0	0	0	0	0	0	0	0	0	0	0	0	0	0	0
128	0	0	0	0	0	0	0	0	0	0	0	0	0	0	0	0	0	0	0	0	0	0	0	0	0	0	0	0	0	0	0	0	0
129	0	0	0	0	0	0	0	0	0	0	0	0	0	0	0	0	0	0	0	0	0	0	0	0	0	0	0	0	0	0	0	0	0
130	0	0	0	0	0	0	0	0	0	0	0	0	0	0	0	0	0	0	0	0	0	0	0	0	0	0	0	0	0	0	0	0	0
131	0	0	0	0	0	0	0	0	0	0	0	0	0	0	0	0	0	0	0	0	0	0	0	0	0	0	0	0	0	0	0	0	0
132	0	0	0	0	0	0	0	0	0	0	0	0	0	0	0	0	0	0	0	0	0	0	0	0	0	0	0	0	0	0	0	0	0
133	0	0	0	0	0	0	0	0	0	0	0	0	0	0	0	0	0	0	0	0	0	0	0	0	0	0	0	0	0	0	0	0	0
134	0	0	0	0	0	0	0	0	0	0	0	0	0	0	0	0	0	0	0	0	0	0	0	0	0	0	0	0	0	0	0	0	0
135	0	0	0	0	0	0	0	0	0	0	0	0	0	0	0	0	0	0	0	0	0	0	0	0	0	0	0	0	0	0	0	0	0
136	0	0	0	0	0	0	0	0	0	0	0	0	0	0	0	0	0	0	0	0	0	0	0	0	0	0	0	0	0	0	0	0	0
137	0	0	0	0	0	0	0	0	0	0	0	0	0	0	0	0	0	0	0	0	0	0	0	0	0	0	0	0	0	0	0	0	0
138	0	0	0	0	0	0	0	0	0	0	0	0	0	0	0	0	0	0	0	0	0	0	0	0	0	0	0	0	0	0	0	0	0
139	0	0	0	0	0	0	0	0	0	0	0	0	0	0	0	0	0	0	0	0	0	0	0	0	0	0	0	0	0	0	0	0	0
140	0	0	0	0	0	0	0	0	0	0	0	0	0	0	0	0	0	0	0	0	0	0	0	0	0	0	0	0	0	0	0	0	0
141	0	0	0	0	0	0	0	0	0	0	0	0	0	0	0	0	0	0	0	0	0	0	0	0	0	0	0	0	0	0	0	0	0
142	0	0	0	0	0	0	0	0	0	0	0	0	0	0	0	0	0	0	0	0	0	0	0	0	0	0	0	0	0	0	0	0	0
143	0	0	0	0	0	0	0	0	0	0	0	0	0	0	0	0	0	0	0	0	0	0	0	0	0	0	0	0	0	0	0	0	0
144	0	0	0	0	0	0	0	0	0	0	0	0	0	0	0	0	0	0	0	0	0	0	0	0	0	0	0	0	0	0	0	0	0
145	0	0	0	0	0	0	0	0	0	0	0	0	0	0	0	0	0	0	0	0	0	0	0	0	0	0	0	0	0	0	0	0	0
146	0	0	0	0	0	0	0	0	0	0	0	0	0	0	0	0	0	0	0	0	0	0	0	0	0	0	0	0	0	0	0	0	0
147	0	0	0	0	0	0	0	0	0	0	0	0	0	0	0	0	0	0	0	0	0	0	0	0	0	0	0	0	0	0	0	0	0
148	0	0	0	0	0	0	0	0	0	0	0	0	0	0	0	0	0	0	0	0	0	0	0	0	0	0	0	0	0	0	0	0	0
149	0	0	0	0	0	0	0	0	0	0	0	0	0	0	0	0	0	0	0	0	0	0	0	0	0	0	0	0	0	0	0	0	0
150	0	0	0	0	0	0	0	0	0	0	0	0	0	0	0	0	0	0	0	0	0	0	0	0	0	0	0	0	0	0	0	0	0
151	0	0	0	0	0	0	0	0	0	0	0	0	0	0	0	0	0	0	0	0	0	0	0	0	0	0	0	0	0	0	0	0	0
152	0	0	0	0	0	0	0	0	0	0	0	0	0	0	0	0	0	0	0	0	0	0	0	0	0	0	0	0	0	0	0	0	0
153	0	0	0	0	0	0	0	0	0	0	0	0	0	0	0	0	0	0	0	0	0	0	0	0	0	0	0	0	0	0	0	0	0
154	0	0	0	0	0	0	0	0	0	0	0	0	0	0	0	0	0	0	0	0	0	0	0	0	0	0	0	0	0	0	0	0	0
155	0	0	0	0	0	0	0	0	0	0	0	0	0	0	0	0	0	0	0	0	0	0	0	0	0	0	0	0	0	0	0	0	0
156	0	0	0	0	0	0	0	0	0	0	0	0	0	0	0	0	0	0	0	0	0	0	0	0	0	0	0	0	0	0	0	0	0
157	0	0	0	0	0	0	0	0	0	0	0	0	0	0	0	0	0	0	0	0	0	0	0	0	0	0	0	0	0	0	0	0	0
158	0	0	0	0	0	0	0	0	0	0	0	0	0	0	0	0	0	0	0	0	0	0	0	0	0	0	0	0	0	0	0	0	0
159	0	0	0	0	0	0	0	0	0	0	0	0	0	0	0	0	0	0	0	0	0	0	0	0	0	0	0	0	0	0	0	0	0
160	0	0	0	0	0	0	0	0	0	0	0	0	0	0	0	0	0	0	0	0	0	0	0	0	0	0	0	0	0	0	0	0	0
161	0	0	0	0	0	0	0	0	0	0	0	0	0	0	0	0	0	0	0	0	0	0	0	0	0	0	0	0	0	0	0	0	0
162	0	0	0	0	0	0	0	0	0	0	0	0	0	0	0	0	0	0	0	0	0	0	0	0	0	0	0	0	0	0	0	0	0
163	0	0	0	0	0	0	0	0	0	0	0	0	0	0	0	0	0	0	0	0	0	0	0	0	0	0	0	0	0	0	0	0	0
164	0	0	0	0	0	0	0	0	0	0	0	0	0	0	0	0	0	0	0	0	0	0	0	0	0	0	0	0	0	0	0	0	0
165	0	0	0	0	0	0	0	0	0	0	0	0	0	0	0	0	0	0	0	0	0	0	0	0	0	0	0	0	0	0	0	0	0
166	0	0	0	0	0	0	0	0	0	0	0	0	0	0	0	0	0	0	0	0	0	0	0	0	0	0	0	0	0	0	0	0	0
167	0	0	0	0	0	0	0	0	0	0	0	0	0	0	0	0	0	0	0	0	0	0	0	0	0	0	0	0	0	0	0	0	0
168	0	0	0	0	0	0	0	0	0	0	0	0	0	0	0	0	0	0	0	0	0	0	0	0	0	0	0	0	0	0	0	0	0
169	0	0	0	0	0	0	0	0	0	0	0	0	0	0	0	0	0	0	0	0	0	0	0	0	0	0	0	0	0	0	0	0	0
170	0	0	0	0	0	0	0	0	0	0	0	0	0	0	0	0	0	0	0	0	0	0	0	0	0	0	0	0	0	0	0	0	0
171	0	0	0	0	0	0	0	0	0	0	0	0	0	0	0	0	0	0	0	0	0	0	0	0	0	0	0	0	0	0	0	0	0
172	0	0	0	0	0	0	0	0	0	0	0	0	0	0	0	0	0	0	0	0	0	0	0	0	0	0	0	0	0	0	0	0	0
173	0	0	0	0	0	0	0	0	0	0	0	0	0	0	0	0	0	0	0	0	0	0	0	0	0	0	0	0	0	0	0	0	0
174	0	0	0	0	0	0	0	0	0	0	0	0	0	0	0	0	0	0	0	0	0	0	0	0	0	0	0	0	0	0	0	0	0
175	0	0	0	0	0	0	0	0	0	0	0	0	0	0	0	0	0	0	0	0	0	0	0	0	0	0	0	0	0	0	0	0	0
176	0	0	0	0	0	0	0	0	0	0	0	0	0	0	0	0	0	0	0	0	0	0	0	0	0	0	0	0	0	0	0	0	0
177	0	0	0	0	0	0	0	0	0	0	0	0	0	0	0	0	0	0	0	0	0	0	0	0	0	0	0	0	0	0	0	0	0
178	0	0	0	0	0	0	0	0	0	0	0	0	0	0	0	0	0	0	0	0	0	0	0	0	0	0	0	0	0	0	0	0	0
179	0	0	0	0	0	0	0	0	0	0	0	0	0	0	0	0	0	0	0	0	0	0	0	0	0	0	0	0	0	0	0	0	0
180	0	0	0	0	0	0	0	0	0	0	0	0	0	0	0	0	0	0	0	0	0	0	0	0	0	0	0	0	0	0	0	0	0
181	0	0	0	0	0	0	0	0	0	0	0	0	0	0	0	0	0	0	0	0	0	0	0	0	0	0	0	0	0	0	0	0	0
182	0	0	0	0	0	0	0	0	0	0	0	0	0	0	0	0	0	0	0	0	0	0	0	0	0	0	0	0	0	0	0	0	0
183	0	0	0	0	0	0	0	0	0	0	0	0	0	0	0	0	0	0	0	0	0	0	0	0	0	0	0	0	0	0	0	0	0
184	0	0	0	0	0	0	0	0	0	0	0	0	0	0	0	0	0	0	0	0	0	0	0	0	0	0	0	0	0	0	0	0	0
185	0	0	0	0	0	0	0	0	0	0	0	0	0	0	0	0	0	0	0	0	0	0	0	0	0	0	0	0	0	0	0	0	0
186	0	0	0	0	0	0	0	0	0	0	0	0	0	0	0	0	0	0	0	0	0	0	0	0	0	0	0	0	0	0	0	0	0
187	0	0	0	0	0	0	0	0	0	0	0	0	0	0	0	0	0	0	0	0	0	0	0	0	0	0	0	0	0	0	0	0	0
188	0	0	0	0	0	0	0	0	0	0	0	0	0	0	0	0	0	0	0	0	0	0	0	0	0	0	0	0	0	0	0	0	0
189	0	0	0	0	0	0	0	0	0	0	0	0	0	0	0	0	0	0	0	0	0	0	0	0	0	0	0	0	0	0	0	0	0
190	0	0	0	0	0	0	0	0	0	0	0	0	0	0	0	0	0	0	0	0	0	0	0	0	0	0	0	0	0	0	0	0	0
191	0	0	0	0	0	0	0	0	0	0	0	0	0	0	0	0	0	0	0	0	0	0	0	0	0	0	0	0	0	0	0	0	0
192	0	0	0	0	0	0	0	0	0	0	0	0	0	0	0	0	0	0	0	0	0	0	0	0	0	0	0	0	0	0	0	0	0
193	0	0	0	0	0	0	0	0	0	0	0	0	0	0	0	0	0	0	0	0	0	0	0	0	0	0	0	0	0	0	0	0	0
194	0	0	0	0	0	0	0	0	0	0	0	0	0	0	0	0	0	0	0	0	0	0	0	0	0	0	0	0	0	0	0	0	0
195	0	0	0	0	0	0	0	0	0	0	0	0	0	0	0	0	0	0	0	0	0	0	0	0	0	0	0	0	0	0	0	0	0
196	0	0	0	0	0	0	0	0	0	0	0	0	0	0	0	0	0	0	0	0	0	0	0	0	0	0	0	0	0	0	0	0	0
197	0	0	0	0	0	0	0	0	0	0	0	0	0	0	0	0	0	0	0	0	0	0	0	0	0	0	0	0	0	0	0	0	0
198	0	0	0	0	0	0	0	0	0	0	0	0	0	0	0	0	0	0	0	0	0	0	0	0	0	0	0	0	0	0	0	0	0
199	0	0	0	0	0	0	0	0	0	0	0	0	0	0	0	0	0	0	0	0	0	0	0	0	0	0	0	0	0	0	0	0	0
200	0	0	0	0	0	0	0	0	0	0	0	0	0	0	0	0	0	0	0	0	0	0	0	0	0	0	0	0	0	0	0	0	0
201	0	0	0	0	0	0	0	0	0	0	0	0	0	0	0	0	0	0	0	0	0	0	0	0	0	0	0	0	0	0	0	0	0
202	0	0	0	0	0	0	0	0	0	0	0	0	0	0	0	0	0	0	0	0	0	0	0	0	0	0	0	0	0	0	0	0	0
203	0	0	0	0	0	0	0	0	0	0	0	0	0	0	0	0	0	0	0	0	0	0	0	0	0	0	0	0	0	0	0	0	0
204	0	0	0	0	0	0	0	0	0	0	0	0	0	0	0	0	0	0	0	0	0	0	0	0	0	0	0	0	0	0	0	0	0
205	0	0	0	0	0	0	0	0	0	0	0	0	0	0	0	0	0	0	0	0	0	0	0	0	0	0	0	0	0	0	0	0	0
206	0	0	0	0	0	0	0	0	0	0	0	0	0	0	0	0	0	0	0	0	0	0	0	0	0	0	0	0	0	0	0	0	0
207	0	0	0	0	0	0	0	0	0	0	0	0	0	0	0	0	0	0	0	0	0	0	0	0	0	0	0	0	0	0	0	0	0
208	0	0	0	0	0	0	0	0	0	0	0	0	0	0	0	0	0	0	0	0	0	0	0	0	0	0	0	0	0	0	0	0	0
209	0	0	0	0	0	0	0	0	0	0	0	0	0	0	0	0	0	0	0	0	0	0	0	0	0	0	0	0	0	0	0	0	0
210	0	0	0	0	0	0	0	0	0	0	0	0	0	0	0	0	0	0	0	0	0	0	0	0	0	0	0	0	0	0	0	0	0
211	0	0	0	0	0	0	0	0	0	0	0	0	0	0	0	0	0	0	0	0	0	0	0	0	0	0	0	0	0	0	0	0	0
212	0	0	0	0	0	0	0	0	0	0	0	0	0	0	0	0	0	0	0	0	0	0	0	0	0	0	0	0	0	0	0	0	0
213	0	0	0	0	0	0	0	0	0	0	0	0	0	0	0	0	0	0	0	0	0	0	0	0	0	0	0	0	0	0	0	0	0
214	0	0	0	0	0	0	0	0	0	0	0	0	0	0	0	0	0	0	0	0	0	0	0	0	0	0	0	0	0	0	0	0	0
215	0	0	0	0	0	0	0	0	0	0	0	0	0	0	0	0	0	0	0	0	0	0	0	0	0	0	0	0	0	0	0	0	0
216	0	0	0	0	0	0	0	0	0	0	0	0	0	0	0	0	0	0	0	0	0	0	0	0	0	0	0	0	0	0	0	0	0
217	0	0	0	0	0	0	0	0	0	0	0	0	0	0	0	0	0	0	0	0	0	0	0	0	0	0	0	0	0	0	0	0	0
218	0	0	0	0	0	0	0	0	0	0	0	0	0	0	0	0	0	0	0	0	0	0	0	0	0	0	0	0	0	0	0	0	0
219	0	0	0	0	0	0	0	0	0	0	0	0	0	0	0	0	0	0	0	0	0	0	0	0	0	0	0	0	0	0	0	0	0
220	0	0	0	0	0	0	0	0	0	0	0	0	0	0	0	0	0	0	0	0	0	0	0	0	0	0	0	0	0	0	0	0	0
221	0	0	0	0	0	0	0	0	0	0	0	0	0	0	0	0	0	0	0	0	0	0	0	0	0	0	0	0	0	0	0	0	0
222	0	0	0	0	0	0	0	0	0	0	0	0	0	0	0	0	0	0	0	0	0	0	0	0	0	0	0	0	0	0	0	0	0
223	0	0	0	0	0	0	0	0	0	0	0	0	0	0	0	0	0	0	0	0	0	0	0	0	0	0	0	0	0	0	0	0	0
224	0	0	0	0	0	0	0	0	0	0	0	0	0	0	0	0	0	0	0	0	0	0	0	0	0	0	0	0	0	0	0	0	0
225	0	0	0	0	0	0	0	0	0	0	0	0	0	0	0	0	0	0	0	0	0	0	0	0	0	0	0	0	0	0	0	0	0
226	0	0	0	0	0	0	0	0	0	0	0	0	0	0	0	0	0	0	0	0	0	0	0	0	0	0	0	0	0	0	0	0	0
227	0	0	0	0	0	0	0	0	0	0	0	0	0	0	0	0	0	0	0	0	0	0	0	0	0	0	0	0	0	0	0	0	0
228	0	0	0	0	0	0	0	0	0	0	0	0	0	0	0	0	0	0	0	0	0	0	0	0	0	0	0	0	0	0	0	0	0
229	0	0	0	0	0	0	0	0	0	0	0	0	0	0	0	0	0	0	0	0	0	0	0	0	0	0	0	0	0	0	0	0	0
230	0	0	0	0	0	0	0	0	0	0	0	0	0	0	0	0	0	0	0	0	0	0	0	0	0	0	0	0	0	0	0	0	0
231	0	0	0	0	0	0	0	0	0	0	0	0	0	0	0	0	0	0	0	0	0	0	0	0	0	0	0	0	0	0	0	0	0
232	0	0	0	0	0	0	0	0	0	0	0	0	0	0	0	0	0	0	0	0	0	0	0	0	0	0	0	0	0	0	0	0	0
233	0	0	0	0	0	0	0	0	0	0	0	0	0	0	0	0	0	0	0	0	0	0	0	0	0	0	0	0	0	0	0	0	0
234	0	0	0	0	0	0	0	0	0	0	0	0	0	0	0	0	0	0	0	0	0	0	0	0	0	0	0	0	0	0	0	0	0
235	0	0	0	0	0	0	0	0	0	0	0	0	0	0	0	0	0	0	0	0	0	0	0	0	0	0	0	0	0	0	0	0	0
236	0	0	0	0	0	0	0	0	0	0	0	0	0	0	0	0	0	0	0	0	0	0	0	0	0	0	0	0	0	0	0	0	0
237	0	0	0	0	0	0	0	0	0	0	0	0	0	0	0	0	0	0	0	0	0	0	0	0	0	0	0	0	0	0	0	0	0
238	0	0	0	0	0	0	0	0	0	0	0	0	0	0	0	0	0	0	0	0	0	0	0	0	0	0	0	0	0	0	0	0	0
239	0	0	0	0	0	0	0	0	0	0	0	0	0	0	0	0	0	0	0	0	0	0	0	0	0	0	0	0	0	0	0	0	0
240	0	0	0	0	0	0	0	0	0	0	0	0	0	0	0	0	0	0	0	0	0	0	0	0	0	0	0	0	0	0	0	0	0
241	0	0	0	0	0	0	0	0	0	0	0	0	0	0	0	0	0	0	0	0	0	0	0	0	0	0	0	0	0	0	0	0	0
242	0	0	0	0	0	0	0	0	0	0	0	0	0	0	0	0	0	0	0	0	0	0	0	0	0	0	0	0	0	0	0	0	0
243	0	0	0	0	0	0	0	0	0	0	0	0	0	0	0	0	0	0	0	0	0	0	0	0	0	0	0	0	0	0	0	0	0
244	0	0	0	0	0	0	0	0	0	0	0	0	0	0	0	0	0	0	0	0	0	0	0	0	0	0	0	0	0	0	0	0	0
245	0	0	0	0	0	0	0	0	0	0	0	0	0	0	0	0	0	0	0	0	0	0	0	0	0	0	0	0	0	0	0	0	0
246	0	0	0	0	0	0	0	0	0	0	0	0	0	0	0	0	0	0	0	0	0	0	0	0	0	0	0	0	0	0	0	0	0
247	0	0	0	0	0	0	0	0	0	0	0	0	0	0	0	0	0	0	0	0	0	0	0	0	0	0	0	0	0	0	0	0	0
248	0	0	0	0	0	0	0	0	0	0	0	0	0	0	0	0	0	0	0	0	0	0	0	0	0	0	0	0	0	0	0	0	0
249	0	0	0	0	0	0	0	0	0	0	0	0	0	0	0	0	0	0	0	0	0	0	0	0	0	0	0	0	0	0	0	0	0
250	0	0	0	0	0	0	0	0	0	0	0	0	0	0	0	0	0	0	0	0	0	0	0	0	0	0	0	0	0	0	0	0	0
251	0	0	0	0	0	0	0	0	0	0	0	0	0	0	0	0	0	0	0	0	0	0	0	0	0	0	0	0	0	0	0	0	0
252	0	0	0	0	0	0	0	0	0	0	0	0	0	0	0	0	0	0	0	0	0	0	0	0	0	0	0	0	0	0	0	0	0
253	0	0	0	0	0	0	0	0	0	0	0	0	0	0	0	0	0	0	0	0	0	0	0	0	0	0	0	0	0	0	0	0	0
254	0	0	0	0	0	0	0	0	0	0	0	0	0	0	0	0	0	0	0	0	0	0	0	0	0	0	0	0	0	0	0	0	0
255	0	0	0	0	0	0	0	0	0	0	0	0	0	0	0	0	0	0	0	0	0	0	0	0	0	0	0	0	0	0	0	0	0
256	0	0	0	0	0	0	0	0	0	0	0	0	0	0	0	0	0	0	0	0	0	0	0	0	0	0	0	0	0	0	0	0	0
257	0	0	0	0	0	0	0	0	0	0	0	0	0	0	0	0	0	0	0	0	0	0	0	0	0	0	0	0	0	0	0	0	0
258	0	0	0	0	0	0	0	0	0	0	0	0	0	0	0	0	0	0	0	0	0	0	0	0	0	0	0	0	0	0	0	0	0
259	0	0	0	0	0	0	0	0	0	0	0	0	0	0	0	0	0	0	0	0	0	0	0	0	0	0	0	0	0	0	0	0	0
260	0	0	0	0	0	0	0	0	0	0	0	0	0	0	0	0	0	0	0	0	0	0	0	0	0	0	0	0	0	0	0	0	0
261	0	0	0	0	0	0	0	0	0	0	0	0	0	0	0	0	0	0	0	0	0	0	0	0	0	0	0	0	0	0	0	0	0
262	0	0	0	0	0	0	0	0	0	0	0	0	0	0	0	0	0	0	0	0	0	0	0	0	0	0	0	0	0	0	0	0	0
263	0	0	0	0	0	0	0	0	0	0	0	0	0	0	0	0	0	0	0	0	0	0	0	0	0	0	0	0	0	0	0	0	0
264	0	0	0	0	0	0	0	0	0	0	0	0	0	0	0	0	0	0	0	0	0	0	0	0	0	0	0	0	0	0	0	0	0
265	0	0	0	0	0	0	0	0	0	0	0	0	0	0	0	0	0	0	0	0	0	0	0	0	0	0	0	0	0	0	0	0	0
266	0	0	0	0	0	0	0	0	0	0	0	0	0	0	0	0	0	0	0	0	0	0	0	0	0	0	0	0	0	0	0	0	0
267	0	0	0	0	0	0	0	0	0	0	0	0	0	0	0	0	0	0	0	0	0	0	0	0	0	0	0	0	0	0	0	0	0
268	0	0	0	0	0	0	0	0	0	0	0	0	0	0	0	0	0	0	0	0	0	0	0	0	0	0	0	0	0	0	0	0	0
269	0	0	0	0	0	0	0	0	0	0	0	0	0	0	0	0	0	0	0	0	0	0	0	0	0	0	0	0	0	0	0	0	0
270	0	0	0	0	0	0	0	0	0	0	0	0	0	0	0	0	0	0	0	0	0	0	0	0	0	0	0	0	0	0	0	0	0
271	0	0	0	0	0	0	0	0	0	0	0	0	0	0	0	0	0	0	0	0	0	0	0	0	0	0	0	0	0	0	0	0	0
272	0	0	0	0	0	0	0	0	0	0	0	0	0	0	0	0	0	0	0	0	0	0	0	0	0	0	0	0	0	0	0	0	0
273	0	0	0	0	0	0	0	0	0	0	0	0	0	0	0	0	0	0	0	0	0	0	0	0	0	0	0	0	0	0	0	0	0
274	0	0	0	0	0	0	0	0	0	0	0	0	0	0	0	0	0	0	0	0	0	0	0	0	0	0	0	0	0	0	0	0	0
275	0	0	0	0	0	0	0	0	0	0	0	0	0	0	0	0	0	0	0	0	0	0	0	0	0	0	0	0	0	0	0	0	0
276	0	0	0	0	0	0	0	0	0	0	0	0	0	0	0	0	0	0	0	0	0	0	0	0	0	0	0	0	0	0	0	0	0
277	0	0	0	0	0	0	0	0	0	0	0	0	0	0	0	0	0	0	0	0	0	0	0	0	0	0	0	0	0	0	0	0	0
278	0	0	0	0	0	0	0	0	0	0	0	0	0	0	0	0	0	0	0	0	0	0	0	0	0	0	0	0	0	0	0	0	0
279	0	0	0	0	0	0	0	0	0	0	0	0	0	0	0	0	0	0	0	0	0	0	0	0	0	0	0	0	0	0	0	0	0
280	0	0	0	0	0	0	0	0	0	0	0	0	0	0	0	0	0	0	0	0	0	0	0	0	0	0	0	0	0	0	0	0	0
281	0	0	0	0	0	0	0	0	0	0	0	0	0	0	0	0	0	0	0	0	0	0	0	0	0	0	0	0	0	0	0	0	0
282	0	0	0	0	0	0	0	0	0	0	0	0	0	0	0	0	0	0	0	0	0	0	0	0	0	0	0	0	0	0	0	0	0
283	0	0	0	0	0	0	0	0	0	0	0	0	0	0	0	0	0	0	0	0	0	0	0	0	0	0	0	0	0	0	0	0	0
284	0	0	0	0	0	0	0	0	0	0	0	0	0	0	0	0	0	0	0	0	0	0	0	0	0	0	0	0	0	0	0	0	0
285	0	0	0	0	0	0	0	0	0	0	0	0	0	0	0	0	0	0	0	0	0	0	0	0	0	0	0	0	0	0	0	0	0
286	0	0	0	0	0	0	0	0	0	0	0	0	0	0	0	0	0	0	0	0	0	0	0	0	0	0	0	0	0	0	0	0	0
287	0	0	0	0	0	0	0	0	0	0	0	0	0	0	0	0	0	0	0	0	0	0	0	0	0	0	0	0	0	0	0	0	0
288	0	0	0	0	0	0	0	0	0	0	0	0	0	0	0	0	0	0	0	0	0	0	0	0	0	0	0	0	0	0	0	0	0
289	0	0	0	0	0	0	0	0	0	0	0	0	0	0	0	0	0	0	0	0	0	0	0	0	0	0	0	0	0	0	0	0	0
290	0	0	0	0	0	0	0	0	0	0	0	0	0	0	0	0	0	0	0	0	0	0	0	0	0	0	0	0	0	0	0	0	0
291	0	0	0	0	0	0	0	0	0	0	0	0	0	0	0	0	0	0	0	0	0	0	0	0	0	0	0	0	0	0	0	0	0
292	0	0	0	0	0	0	0	0	0	0	0	0	0	0	0	0	0	0	0	0	0	0	0	0	0	0	0	0	0	0	0	0	0
293	0	0	0	0	0	0	0	0	0	0	0	0	0	0	0	0	0	0	0	0	0	0	0	0	0	0	0	0	0	0	0	0	0
294	0	0	0	0	0	0	0	0	0	0	0	0	0	0	0	0	0	0	0	0	0	0	0	0	0	0	0	0	0	0	0	0	0
295	0	0	0	0	0	0	0	0	0	0	0	0	0	0	0	0	0	0	0	0	0	0	0	0	0	0	0	0	0	0	0	0	0
296	0	0	0	0	0	0	0	0	0	0	0	0	0	0	0	0	0	0	0	0	0	0	0	0	0	0	0	0	0	0	0	0	0
297	0	0	0	0	0	0	0	0	0	0	0	0	0	0	0	0	0	0	0	0	0	0	0	0	0	0	0	0	0	0	0	0	0
298	0	0	0	0	0	0	0	0	0	0	0	0	0	0	0	0	0	0	0	0	0	0	0	0	0	0	0	0	0	0	0	0	0
299	0	0	0	0	0	0	0	0	0	0	0	0	0	0	0	0	0	0	0	0	0	0	0	0	0	0	0	0	0	0	0	0	0
300	0	0	0	0	0	0	0	0	0	0	0	0	0	0	0	0	0	0	0	0	0	0	0	0	0	0	0	0	0	0	0	0	0
301	0	0	0	0	0	0	0	0	0	0	0	0	0	0	0	0	0	0	0	0	0	0	0	0	0	0	0	0	0	0	0	0	0
302	0	0	0	0	0	0	0	0	0	0	0	0	0	0	0	0	0	0	0	0	0	0	0	0	0	0	0	0	0	0	0	0	0
303	0	0	0	0	0	0	0	0	0	0	0	0	0	0	0	0	0	0	0	0	0	0	0	0	0	0	0	0	0	0	0	0	0
304	0	0	0	0	0	0	0	0	0	0	0	0	0	0	0	0	0	0	0	0	0	0	0	0	0	0	0	0	0	0	0	0	0
305	0	0	0	0	0	0	0	0	0	0	0	0	0	0	0	0	0	0	0	0	0	0	0	0	0	0	0	0	0	0	0	0	0
306	0	0	0	0	0	0	0	0	0	0	0	0	0	0	0	0	0	0	0	0	0	0	0	0	0	0	0	0	0	0	0	0	0
307	0	0	0	0	0	0	0	0	0	0	0	0	0	0	0	0	0	0	0	0	0	0	0	0	0	0	0	0	0	0	0	0	0
308	0	0	0	0	0	0	0	0	0	0	0	0	0	0	0	0	0	0	0	0	0	0	0	0	0	0	0	0	0	0	0	0	0
309	0	0	0	0	0	0	0	0	0	0	0	0	0	0	0	0	0	0	0	0	0	0	0	0	0	0	0	0	0	0	0	0	0
310	0	0	0	0	0	0	0	0	0	0	0	0	0	0	0	0	0	0	0	0	0	0	0	0	0	0	0	0	0	0	0	0	0
311	0	0	0	0	0	0	0	0	0	0	0	0	0	0	0	0	0	0	0	0	0	0	0	0	0	0	0	0	0	0	0	0	0
312	0	0	0	0	0	0	0	0	0	0	0	0	0	0	0	0	0	0	0	0	0	0	0	0	0	0	0	0	0	0	0	0	0
313	0	0	0	0	0	0	0	0	0	0	0	0	0	0	0	0	0	0	0	0	0	0	0	0	0	0	0	0	0	0	0	0	0
314	0	0	0	0	0	0	0	0	0	0	0	0	0	0	0	0	0	0	0	0	0	0	0	0	0	0	0	0	0	0	0	0	0
315	0	0	0	0	0	0	0	0	0	0	0	0	0	0	0	0	0	0	0	0	0	0	0	0	0	0	0	0	0	0	0	0	0
316	0	0	0	0	0	0	0	0	0	0	0	0	0	0	0	0	0	0	0	0	0	0	0	0	0	0	0	0	0	0	0	0	0
317	0	0	0	0	0	0	0	0	0	0	0	0	0	0	0	0	0	0	0	0	0	0	0	0	0	0	0	0	0	0	0	0	0
318	0	0	0	0	0	0	0	0	0	0	0	0	0	0	0	0	0	0	0	0	0	0	0	0	0	0	0	0	0	0	0	0	0
319	0	0	0	0	0	0	0	0	0	0	0	0	0	0	0	0	0	0	0	0	0	0	0	0	0	0	0	0	0	0	0	0	0
320	0	0	0	0	0	0	0	0	0	0	0	0	0	0	0	0	0	0	0	0	0	0	0	0	0	0	0	0	0	0	0	0	0
321	0	0	0	0	0	0	0	0	0	0	0	0	0	0	0	0	0	0	0	0	0	0	0	0	0	0	0	0	0	0	0	0	0
322	0	0	0	0	0	0	0	0	0	0	0	0	0	0	0	0	0	0	0	0	0	0	0	0	0	0	0	0	0	0	0	0	0
323	0	0	0	0	0	0	0	0	0	0	0	0	0	0	0	0	0	0	0	0	0	0	0	0	0	0	0	0	0	0	0	0	0
324	0	0	0	0	0	0	0	0	0	0	0	0	0	0	0	0	0	0	0	0	0	0	0	0	0	0	0	0	0	0	0	0	0
325	0	0	0	0	0	0	0	0	0	0	0	0	0	0	0	0	0	0	0	0	0	0	0	0	0	0	0	0	0	0	0	0	0
326	0	0	0	0	0	0	0	0	0	0	0	0	0	0	0	0	0	0	0	0	0	0	0	0	0	0	0	0	0	0	0	0	0
327	0	0	0	0	0	0	0	0	0	0	0	0	0	0	0	0	0	0	0	0	0	0	0	0	0	0	0	0	0	0	0	0	0
328	0	0	0	0	0	0	0	0	0	0	0	0	0	0	0	0	0	0	0	0	0	0	0	0	0	0	0	0	0	0	0	0	0
329	0	0	0	0	0	0	0	0	0	0	0	0	0	0	0	0	0	0	0	0	0	0	0	0	0	0	0	0	0	0	0	0	0
330	0	0	0	0	0	0	0	0	0	0	0	0	0	0	0	0	0	0	0	0	0	0	0	0	0	0	0	0	0	0	0	0	0
331	0	0	0	0	0	0	0	0	0	0	0	0	0	0	0	0	0	0	0	0	0	0	0	0	0	0	0	0	0	0	0	0	0
332	0	0	0	0	0	0	0	0	0	0	0	0	0	0	0	0	0	0	0	0	0	0	0	0	0	0	0	0	0	0	0	0	0
333	0	0	0	0	0	0	0	0	0	0	0	0	0	0	0	0	0	0	0	0	0	0	0	0	0	0	0	0	0	0	0	0	0
334	0	0	0	0	0	0	0	0	0	0	0	0	0	0	0	0	0	0	0	0	0	0	0	0	0	0	0	0	0	0	0	0	0
335	0	0	0	0	0	0	0	0	0	0	0	0	0	0	0	0	0	0	0	0	0	0	0	0	0	0	0	0	0	0	0	0	0
336	0	0	0	0	0	0	0	0	0	0	0	0	0	0	0	0	0	0	0	0	0	0	0	0	0	0	0	0	0	0	0	0	0
337	0	0	0	0	0	0	0	0	0	0	0	0	0	0	0	0	0	0	0	0	0	0	0	0	0	0	0	0	0	0	0	0	0
338	0	0	0	0	0	0	0	0	0	0	0	0	0	0	0	0	0	0	0	0	0	0	0	0	0	0	0	0	0	0	0	0	0
339	0	0	0	0	0	0	0	0	0	0	0	0	0	0	0	0	0	0	0	0	0	0	0	0	0	0	0	0	0	0	0	0	0
340	0	0	0	0	0	0	0	0	0	0	0	0	0	0	0	0	0	0	0	0	0	0	0	0	0	0	0	0	0	0	0	0	0
341	0	0	0	0	0	0	0	0	0	0	0	0	0	0	0	0	0	0	0	0	0	0	0	0	0	0	0	0	0	0	0	0	0
342	0	0	0	0	0	0	0	0	0	0	0	0	0	0	0	0	0	0	0	0	0	0	0	0	0	0	0	0	0	0	0	0	0
343	0	0	0	0	0	0	0	0	0	0	0	0	0	0	0	0	0	0	0	0	0	0	0	0	0	0	0	0	0	0	0	0	0
344	0	0	0	0	0	0	0	0	0	0	0	0	0	0	0	0	0	0	0	0	0	0	0	0	0	0	0	0	0	0	0	0	0
345	0	0	0	0	0	0	0	0	0	0	0	0	0	0	0	0	0	0	0	0	0	0	0	0	0	0	0	0	0	0	0	0	0
346	0	0	0	0	0	0	0	0	0	0	0	0	0	0	0	0	0	0	0	0	0	0	0	0	0	0	0	0	0	0	0	0	0
347	0	0	0	0	0	0	0	0	0	0	0	0	0	0	0	0	0	0	0	0	0	0	0	0	0	0	0	0	0	0	0	0	0
348	0	0	0	0	0	0	0	0	0	0	0	0	0	0	0	0	0	0	0	0	0	0	0	0	0	0	0	0	0	0	0	0	0
349	0	0	0	0	0	0	0	0	0	0	0	0	0	0	0	0	0	0	0	0	0	0	0	0	0	0	0	0	0	0	0	0	0
350	0	0	0	0	0	0	0	0	0	0	0	0	0	0	0	0	0	0	0	0	0	0	0	0	0	0	0	0	0	0	0	0	0
351	0	0	0	0	0	0	0	0	0	0	0	0	0	0	0	0	0	0	0	0	0	0	0	0	0	0	0	0	0	0	0	0	0
352	0	0	0	0	0	0	0	0	0	0	0	0	0	0	0	0	0	0	0	0	0	0	0	0	0	0	0	0	0	0	0	0	0
353	0	0	0	0	0	0	0	0	0	0	0	0	0	0	0	0	0	0	0	0	0	0	0	0	0	0	0	0	0	0	0	0	0
354	0	0	0	0	0	0	0	0	0	0	0	0	0	0	0	0	0	0	0	0	0	0	0	0	0	0	0	0	0	0	0	0	0
355	0	0	0	0	0	0	0	0	0	0	0	0	0	0	0	0	0	0	0	0	0	0	0	0	0	0	0	0	0	0	0	0	0
356	0	0	0	0	0	0	0	0	0	0	0	0	0	0	0	0	0	0	0	0	0	0	0	0	0	0	0	0	0	0	0	0	0
357	0	0	0	0	0	0	0	0	0	0	0	0	0	0	0	0	0	0	0	0	0	0	0	0	0	0	0	0	0	0	0	0	0
358	0	0	0	0	0	0	0	0	0	0	0	0	0	0	0	0	0	0	0	0	0	0	0	0	0	0	0	0	0	0	0	0	0
359	0	0	0	0	0	0	0	0	0	0	0	0	0	0	0	0	0	0	0	0	0	0	0	0	0	0	0	0	0	0	0	0	0
360	0	0	0	0	0	0	0	0	0	0	0	0	0	0	0	0	0	0	0	0	0	0	0	0	0	0	0	0	0	0	0	0	0
361	0	0	0	0	0	0	0	0	0	0	0	0	0	0	0	0	0	0	0	0	0	0	0	0	0	0	0	0	0	0	0	0	0
362	0	0	0	0	0	0	0	0	0	0	0	0	0	0	0	0	0	0	0	0	0	0	0	0	0	0	0	0	0	0	0	0	0
363	0	0	0	0	0	0	0	0	0	0	0	0	0	0	0	0	0	0	0	0	0	0	0	0	0	0	0	0	0	0	0	0	0
364	0	0	0	0	0	0	0	0	0	0	0	0	0	0	0	0	0	0	0	0	0	0	0	0	0	0	0	0	0	0	0	0	0
365	0	0	0	0	0	0	0	0	0	0	0	0	0	0	0	0	0	0	0	0	0	0	0	0	0	0	0	0	0	0	0	0	0
366	0	0	0	0	0	0	0	0	0	0	0	0	0	0	0	0	0	0	0	0	0	0	0	0	0	0	0	0	0	0	0	0	0
367	0	0	0	0	0	0	0	0	0	0	0	0	0	0	0	0	0	0	0	0	0	0	0	0	0	0	0	0	0	0	0	0	0
368	0	0	0	0	0	0	0	0	0	0	0	0	0	0	0	0	0	0	0	0	0	0	0	0	0	0	0	0	0	0	0	0	0
369	0	0	0	0	0	0	0	0	0	0	0	0	0	0	0	0	0	0	0	0	0	0	0	0	0	0	0	0	0	0	0	0	0
370	0	0	0	0	0	0	0	0	0	0	0	0	0	0	0	0	0	0	0	0	0	0	0	0	0	0	0	0	0	0	0	0	0
371	0	0	0	0	0	0	0	0	0	0	0	0	0	0	0	0	0	0	0	0	0	0	0	0	0	0	0	0	0	0	0	0	0
372	0	0	0	0	0	0	0	0	0	0	0	0	0	0	0	0	0	0	0	0	0	0	0	0	0	0	0	0	0	0	0	0	0
373	0	0	0	0	0	0	0	0	0	0	0	0	0	0	0	0	0	0	0	0	0	0	0	0	0	0	0	0	0	0	0	0	0
374	0	0	0	0	0	0	0	0	0	0	0	0	0	0	0	0	0	0	0	0	0	0	0	0	0	0	0	0	0	0	0	0	0
375	0	0	0	0	0	0	0	0	0	0	0	0	0	0	0	0	0	0	0	0	0	0	0	0	0	0	0	0	0	0	0	0	0
376	0	0	0	0	0	0	0	0	0	0	0	0	0	0	0	0	0	0	0	0	0	0	0	0	0	0	0	0	0	0	0	0	0
377	0	0	0	0	0	0	0	0	0	0	0	0	0	0	0	0	0	0	0	0	0	0	0	0	0	0	0	0	0	0	0	0	0
378	0	0	0	0	0	0	0	0	0	0	0	0	0	0	0	0	0	0	0	0	0	0	0	0	0	0	0	0	0	0	0	0	0
379	0	0	0	0	0	0	0	0	0	0	0	0	0	0	0	0	0	0	0	0	0	0	0	0	0	0	0	0	0	0	0	0	0
380	0	0	0	0	0	0	0	0	0	0	0	0	0	0	0	0	0	0	0	0	0	0	0	0	0	0	0	0	0	0	0	0	0
381	0	0	0	0	0	0	0	0	0	0	0	0	0	0	0	0	0	0	0	0	0	0	0	0	0	0	0	0	0	0	0	0	0
382	0	0	0	0	0	0	0	0	0	0	0	0	0	0	0	0	0	0	0	0	0	0	0	0	0	0	0	0	0	0	0	0	0
383	0	0	0	0	0	0	0	0	0	0	0	0	0	0	0	0	0	0	0	0	0	0	0	0	0	0	0	0	0	0	0	0	0
384	0	0	0	0	0	0	0	0	0	0	0	0	0	0	0	0	0	0	0	0	0	0	0	0	0	0	0	0	0	0	0	0	0
385	0	0	0	0	0	0	0	0	0	0	0	0	0	0	0	0	0	0	0	0	0	0	0	0	0	0	0	0	0	0	0	0	0
386	0	0	0	0	0	0	0	0	0	0	0	0	0	0	0	0	0	0	0	0	0	0	0	0	0	0	0	0	0	0	0	0	0
387	0	0	0	0	0	0	0	0	0	0	0	0	0	0	0	0	0	0	0	0	0	0	0	0	0	0	0	0	0	0	0	0	0
388	0	0	0	0	0	0	0	0	0	0	0	0	0	0	0	0	0	0	0	0	0	0	0	0	0	0	0	0	0	0	0	0	0
389	0	0	0	0	0	0	0	0	0	0	0	0	0	0	0	0	0	0	0	0	0	0	0	0	0	0	0	0	0	0	0	0	0
390	0	0	0	0	0	0	0	0	0	0	0	0	0	0	0	0	0	0	0	0	0	0	0	0	0	0	0	0	0	0	0	0	0
391	0	0	0	0	0	0	0	0	0	0	0	0	0	0	0	0	0	0	0	0	0	0	0	0	0	0	0	0	0	0	0	0	0
392	0	0	0	0	0	0	0	0	0	0	0	0	0	0	0	0	0	0	0	0	0	0	0	0	0	0	0	0	0	0	0	0	0
393	0	0	0	0	0	0	0	0	0	0	0	0	0	0	0	0	0	0	0	0	0	0	0	0	0	0	0	0	0	0	0	0	0
394	0	0	0	0	0	0	0	0	0	0	0	0	0	0	0	0	0	0	0	0	0	0	0	0	0	0	0	0	0	0	0	0	0
395	0	0	0	0	0	0	0	0	0	0	0	0	0	0	0	0	0	0	0	0	0	0	0	0	0	0	0	0	0	0	0	0	0
396	0	0	0	0	0	0	0	0	0	0	0	0	0	0	0	0	0	0	0	0	0	0	0	0	0	0	0	0	0	0	0	0	0
397	0	0	0	0	0	0	0	0	0	0	0	0	0	0	0	0	0	0	0	0	0	0	0	0	0	0	0	0	0	0	0	0	0
398	0	0	0	0	0	0	0	0	0	0	0	0	0	0	0	0	0	0	0	0	0	0	0	0	0	0	0	0	0	0	0	0	0
399	0	0	0	0	0	0	0	0	0	0	0	0	0	0	0	0	0	0	0	0	0	0	0	0	0	0	0	0	0	0	0	0	0
400	0	0	0	0	0	0	0	0	0	0	0	0	0	0	0	0	0	0	0	0	0	0	0	0	0	0	0	0	0	0	0	0	0
401	0	0	0	0	0	0	0	0	0	0	0	0	0	0	0	0	0	0	0	0	0	0	0	0	0	0	0	0	0	0	0	0	0
402	0	0	0	0	0	0	0	0	0	0	0	0	0	0	0	0	0	0	0	0	0	0	0	0	0	0	0	0	0	0	0	0	0
403	0	0	0	0	0	0	0	0	0	0	0	0	0	0	0	0	0	0	0	0	0	0	0	0	0	0	0	0	0	0	0	0	0
404	0	0	0	0	0	0	0	0	0	0	0	0	0	0	0	0	0	0	0	0	0	0	0	0	0	0	0	0	0	0	0	0	0
405	0	0	0	0	0	0	0	0	0	0	0	0	0	0	0	0	0	0	0	0	0	0	0	0	0	0	0	0	0	0	0	0	0
406	0	0	0	0	0	0	0	0	0	0	0	0	0	0	0	0	0	0	0	0	0	0	0	0	0	0	0	0	0	0	0	0	0
407	0	0	0	0	0	0	0	0	0	0	0	0	0	0	0	0	0	0	0	0	0	0	0	0	0	0	0	0	0	0	0	0	0
408	0	0	0	0	0	0	0	0	0	0	0	0	0	0	0	0	0	0	0	0	0	0	0	0	0	0	0	0	0	0	0	0	0
409	0	0	0	0	0	0	0	0	0	0	0	0	0	0	0	0	0	0	0	0	0	0	0	0	0	0	0	0	0	0	0	0	0
410	0	0	0	0	0	0	0	0	0	0	0	0	0	0	0	0	0	0	0	0	0	0	0	0	0	0	0	0	0	0	0	0	0
411	0	0	0	0	0	0	0	0	0	0	0	0	0	0	0	0	0	0	0	0	0	0	0	0	0	0	0	0	0	0	0	0	0
412	0	0	0	0	0	0	0	0	0	0	0	0	0	0	0	0	0	0	0	0	0	0	0	0	0	0	0	0	0	0	0	0	0
413	0	0	0	0	0	0	0	0	0	0	0	0	0	0	0	0	0	0	0	0	0	0	0	0	0	0	0	0	0	0	0	0	0
414	0	0	0	0	0	0	0	0	0	0	0	0	0	0	0	0	0	0	0	0	0	0	0	0	0	0	0	0	0	0	0	0	0
415	0	0	0	0	0	0	0	0	0	0	0	0	0	0	0	0	0	0	0	0	0	0	0	0	0	0	0	0	0	0	0	0	0
416	0	0	0	0	0	0	0	0	0	0	0	0	0	0	0	0	0	0	0	0	0	0	0	0	0	0	0	0	0	0	0	0	0
417	0	0	0	0	0	0	0	0	0	0	0	0	0	0	0	0	0	0	0	0	0	0	0	0	0	0	0	0	0	0	0	0	0
418	0	0	0	0	0	0	0	0	0	0	0	0	0	0	0	0	0	0	0	0	0	0	0	0	0	0	0	0	0	0	0	0	0
419	0	0	0	0	0	0	0	0	0	0	0	0	0	0	0	0	0	0	0	0	0	0	0	0	0	0	0	0	0	0	0	0	0
420	0	0	0	0	0	0	0	0	0	0	0	0	0	0	0	0	0	0	0	0	0	0	0	0	0	0	0	0	0	0	0	0	0
421	0	0	0	0	0	0	0	0	0	0	0	0	0	0	0	0	0	0	0	0	0	0	0	0	0	0	0	0	0	0	0	0	0
422	0	0	0	0	0	0	0	0	0	0	0	0	0	0	0	0	0	0	0	0	0	0	0	0	0	0	0	0	0	0	0	0	0
423	0	0	0	0	0	0	0	0	0	0	0	0	0	0	0	0	0	0	0	0	0	0	0	0	0	0	0	0	0	0	0	0	0
424	0	0	0	0	0	0	0	0	0	0	0	0	0	0	0	0	0	0	0	0	0	0	0	0	0	0	0	0	0	0	0	0	0
425	0	0	0	0	0	0	0	0	0	0	0	0	0	0	0	0	0	0	0	0	0	0	0	0	0	0	0	0	0	0	0	0	0
426	0	0	0	0	0	0	0	0	0	0	0	0	0	0	0	0	0	0	0	0	0	0	0	0	0	0	0	0	0	0	0	0	0
427	0	0	0	0	0	0	0	0	0	0	0	0	0	0	0	0	0	0	0	0	0	0	0	0	0	0	0	0	0	0	0	0	0
428	0	0	0	0	0	0	0	0	0	0	0	0	0	0	0	0	0	0	0	0	0	0	0	0	0	0	0	0	0	0	0	0	0
429	0	0	0	0	0	0	0	0	0	0	0	0	0	0	0	0	0	0	0	0	0	0	0	0	0	0	0	0	0	0	0	0	0
430	0	0	0	0	0	0	0	0	0	0	0	0	0	0	0	0	0	0	0	0	0	0	0	0	0	0	0	0	0	0	0	0	0
431	0	0	0	0	0	0	0	0	0	0	0	0	0	0	0	0	0	0	0	0	0	0	0	0	0	0	0	0	0	0	0	0	0
432	0	0	0	0	0	0	0	0	0	0	0	0	0	0	0	0	0	0	0	0	0	0	0	0	0	0	0	0	0	0	0	0	0
433	0	0	0	0	0	0	0	0	0	0	0	0	0	0	0	0	0	0	0	0	0	0	0	0	0	0	0	0	0	0	0	0	0
434	0	0	0	0	0	0	0	0	0	0	0	0	0	0	0	0	0	0	0	0	0	0	0	0	0	0	0	0	0	0	0	0	0
435	0	0	0	0	0	0	0	0	0	0	0	0	0	0	0	0	0	0	0	0	0	0	0	0	0	0	0	0	0	0	0	0	0
436	0	0	0	0	0	0	0	0	0	0	0	0	0	0	0	0	0	0	0	0	0	0	0	0	0	0	0	0	0	0	0	0	0
437	0	0	0	0	0	0	0	0	0	0	0	0	0	0	0	0	0	0	0	0	0	0	0	0	0	0	0	0	0	0	0	0	0
438	0	0	0	0	0	0	0	0	0	0	0	0	0	0	0	0	0	0	0	0	0	0	0	0	0	0	0	0	0	0	0	0	0
439	0	0	0	0	0	0	0	0	0	0	0	0	0	0	0	0	0	0	0	0	0	0	0	0	0	0	0	0	0	0	0	0	0
440	0	0	0	0	0	0	0	0	0	0	0	0	0	0	0	0	0	0	0	0	0	0	0	0	0	0	0	0	0	0	0	0	0
441	0	0	0	0	0	0	0	0	0	0	0	0	0	0	0	0	0	0	0	0	0	0	0	0	0	0	0	0	0	0	0	0	0
442	0	0	0	0	0	0	0	0	0	0	0	0	0	0	0	0	0	0	0	0	0	0	0	0	0	0	0	0	0	0	0	0	0
443	0	0	0	0	0	0	0	0	0	0	0	0	0	0	0	0	0	0	0	0	0	0	0	0	0	0	0	0	0	0	0	0	0
444	0	0	0	0	0	0	0	0	0	0	0	0	0	0	0	0	0	0	0	0	0	0	0	0	0	0	0	0	0	0	0	0	0
445	0	0	0	0	0	0	0	0	0	0	0	0	0	0	0	0	0	0	0	0	0	0	0	0	0	0	0	0	0	0	0	0	0
446	0	0	0	0	0	0	0	0	0	0	0	0	0	0	0	0	0	0	0	0	0	0	0	0	0	0	0	0	0	0	0	0	0
447	0	0	0	0	0	0	0	0	0	0	0	0	0	0	0	0	0	0	0	0	0	0	0	0	0	0	0	0	0	0	0	0	0
448	0	0	0	0	0	0	0	0	0	0	0	0	0	0	0	0	0	0	0	0	0	0	0	0	0	0	0	0	0	0	0	0	0
449	0	0	0	0	0	0	0	0	0	0	0	0	0	0	0	0	0	0	0	0	0	0	0	0	0	0	0	0	0	0	0	0	0
450	0	0	0	0	0	0	0	0	0	0	0	0	0	0	0	0	0	0	0	0	0	0	0	0	0	0	0	0	0	0	0	0	0
451	0	0	0	0	0	0	0	0	0	0	0	0	0	0	0	0	0	0	0	0	0	0	0	0	0	0	0	0	0	0	0	0	0
452	0	0	0	0	0	0	0	0	0	0	0	0	0	0	0	0	0	0	0	0	0	0	0	0	0	0	0	0	0	0	0	0	0
453	0	0	0	0	0	0	0	0	0	0	0	0	0	0	0	0	0	0	0	0	0	0	0	0	0	0	0	0	0	0	0	0	0
454	0	0	0	0	0	0	0	0	0	0	0	0	0	0	0	0	0	0	0	0	0	0	0	0	0	0	0	0	0	0	0	0	0
455	0	0	0	0	0	0	0	0	0	0	0	0	0	0	0	0	0	0	0	0	0	0	0	0	0	0	0	0	0	0	0	0	0
456	0	0	0	0	0	0	0	0	0	0	0	0	0	0	0	0	0	0	0	0	0	0	0	0	0	0	0	0	0	0	0	0	0
457	0	0	0	0	0	0	0	0	0	0	0	0	0	0	0	0	0	0	0	0	0	0	0	0	0	0	0	0	0	0	0	0	0
458	0	0	0	0	0	0	0	0	0	0	0	0	0	0	0	0	0	0	0	0	0	0	0	0	0	0	0	0	0	0	0	0	0
459	0	0	0	0	0	0	0	0	0	0	0	0	0	0	0	0	0	0	0	0	0	0	0	0	0	0	0	0	0	0	0	0	0
460	0	0	0	0	0	0	0	0	0	0	0	0	0	0	0	0	0	0	0	0	0	0	0	0	0	0	0	0	0	0	0	0	0
461	0	0	0	0	0	0	0	0	0	0	0	0	0	0	0	0	0	0	0	0	0	0	0	0	0	0	0	0	0	0	0	0	0
462	0	0	0	0	0	0	0	0	0	0	0	0	0	0	0	0	0	0	0	0	0	0	0	0	0	0	0	0	0	0	0	0	0
463	0	0	0	0	0	0	0	0	0	0	0	0	0	0	0	0	0	0	0	0	0	0	0	0	0	0	0	0	0	0	0	0	0
464	0	0	0	0	0	0	0	0	0	0	0	0	0	0	0	0	0	0	0	0	0	0	0	0	0	0	0	0	0	0	0	0	0
465	0	0	0	0	0	0	0	0	0	0	0	0	0	0	0	0	0	0	0	0	0	0	0	0	0	0	0	0	0	0	0	0	0
466	0	0	0	0	0	0	0	0	0	0	0	0	0	0	0	0	0	0	0	0	0	0	0	0	0	0	0	0	0	0	0	0	0
467	0	0	0	0	0	0	0	0	0	0	0	0	0	0	0	0	0	0	0	0	0	0	0	0	0	0	0	0	0	0	0	0	0
468	0	0	0	0	0	0	0	0	0	0	0	0	0	0	0	0	0	0	0	0	0	0	0	0	0	0	0	0	0	0	0	0	0
469	0	0	0	0	0	0	0	0	0	0	0	0	0	0	0	0	0	0	0	0	0	0	0	0	0	0	0	0	0	0	0	0	0
470	0	0	0	0	0	0	0	0	0	0	0	0	0	0	0	0	0	0	0	0	0	0	0	0	0	0	0	0	0	0	0	0	0
471	0	0	0	0	0	0	0	0	0	0	0	0	0	0	0	0	0	0	0	0	0	0	0	0	0	0	0	0	0	0	0	0	0
472	0	0	0	0	0	0	0	0	0	0	0	0	0	0	0	0	0	0	0	0	0	0	0	0	0	0	0	0	0	0	0	0	0
473	0	0	0	0	0	0	0	0	0	0	0	0	0	0	0	0	0	0	0	0	0	0	0	0	0	0	0	0	0	0	0	0	0
474	0	0	0	0	0	0	0	0	0	0	0	0	0	0	0	0	0	0	0	0	0	0	0	0	0	0	0	0	0	0	0	0	0
475	0	0	0	0	0	0	0	0	0	0	0	0	0	0	0	0	0	0	0	0	0	0	0	0	0	0	0	0	0	0	0	0	0
476	0	0	0	0	0	0	0	0	0	0	0	0	0	0	0	0	0	0	0	0	0	0	0	0	0	0	0	0	0	0	0	0	0
477	0	0	0	0	0	0	0	0	0	0	0	0	0	0	0	0	0	0	0	0	0	0	0	0	0	0	0	0	0	0	0	0	0
478	0	0	0	0	0	0	0	0	0	0	0	0	0	0	0	0	0	0	0	0	0	0	0	0	0	0	0	0	0	0	0	0	0
479	0	0	0	0	0	0	0	0	0	0	0	0	0	0	0	0	0	0	0	0	0	0	0	0	0	0	0	0	0	0	0	0	0
480	0	0	0	0	0	0	0	0	0	0	0	0	0	0	0	0	0	0	0	0	0	0	0	0	0	0	0	0	0	0	0	0	0
481	0	0	0	0	0	0	0	0	0	0	0	0	0	0	0	0	0	0	0	0	0	0	0	0	0	0	0	0	0	0	0	0	0
482	0	0	0	0	0	0	0	0	0	0	0	0	0	0	0	0	0	0	0	0	0	0	0	0	0	0	0	0	0	0	0	0	0
483	0	0	0	0	0	0	0	0	0	0	0	0	0	0	0	0	0	0	0	0	0	0	0	0	0	0	0	0	0	0	0	0	0
484	0	0	0	0	0	0	0	0	0	0	0	0	0	0	0	0	0	0	0	0	0	0	0	0	0	0	0	0	0	0	0	0	0
485	0	0	0	0	0	0	0	0	0	0	0	0	0	0	0	0	0	0	0	0	0	0	0	0	0	0	0	0	0	0	0	0	0
486	0	0	0	0	0	0	0	0	0	0	0	0	0	0	0	0	0	0	0	0	0	0	0	0	0	0	0	0	0	0	0	0	0
487	0	0	0	0	0	0	0	0	0	0	0	0	0	0	0	0	0	0	0	0	0	0	0	0	0	0	0	0	0	0	0	0	0
488	0	0	0	0	0	0	0	0	0	0	0	0	0	0	0	0	0	0	0	0	0	0	0	0	0	0	0	0	0	0	0	0	0
489	0	0	0	0	0	0	0	0	0	0	0	0	0	0	0	0	0	0	0	0	0	0	0	0	0	0	0	0	0	0	0	0	0
490	0	0	0	0	0	0	0	0	0	0	0	0	0	0	0	0	0	0	0	0	0	0	0	0	0	0	0	0	0	0	0	0	0
491	0	0	0	0	0	0	0	0	0	0	0	0	0	0	0	0	0	0	0	0	0	0	0	0	0	0	0	0	0	0	0	0	0
492	0	0	0	0	0	0	0	0	0	0	0	0	0	0	0	0	0	0	0	0	0	0	0	0	0	0	0	0	0	0	0	0	0
493	0	0	0	0	0	0	0	0	0	0	0	0	0	0	0	0	0	0	0	0	0	0	0	0	0	0	0	0	0	0	0	0	0
494	0	0	0	0	0	0	0	0	0	0	0	0	0	0	0	0	0	0	0	0	0	0	0	0	0	0	0	0	0	0	0	0	0
495	0	0	0	0	0	0	0	0	0	0	0	0	0	0	0	0	0	0	0	0	0	0	0	0	0	0	0	0	0	0	0	0	0
496	0	0	0	0	0	0	0	0	0	0	0	0	0	0	0	0	0	0	0	0	0	0	0	0	0	0	0	0	0	0	0	0	0
497	0	0	0	0	0	0	0	0	0	0	0	0	0	0	0	0	0	0	0	0	0	0	0	0	0	0	0	0	0	0	0	0	0
498	0	0	0	0	0	0	0	0	0	0	0	0	0	0	0	0	0	0	0	0	0	0	0	0	0	0	0	0	0	0	0	0	0
499	0	0	0	0	0	0	0	0	0	0	0	0	0	0	0	0	0	0	0	0	0	0	0	0	0	0	0	0	0	0	0	0	0
500	0	0	0	0	0	0	0	0	0	0	0	0	0	0	0	0	0	0	0	0	0	0	0	0	0	0	0	0	0	0	0	0	0
501	0	0	0	0	0	0	0	0	0	0	0	0	0	0	0	0	0	0	0	0	0	0	0	0	0	0	0	0	0	0	0	0	0
502	0	0	0	0	0	0	0	0	0	0	0	0	0	0	0	0	0	0	0	0	0	0	0	0	0	0	0	0	0	0	0	0	0
503	0	0	0	0	0	0	0	0	0	0	0	0	0	0	0	0	0	0	0	0	0	0	0	0	0	0	0	0	0	0	0	0	0
504	0	0	0	0	0	0	0	0	0	0	0	0	0	0	0	0	0	0	0	0	0	0	0	0	0	0	0	0	0	0	0	0	0
505	0	0	0	0	0	0	0	0	0	0	0	0	0	0	0	0	0	0	0	0	0	0	0	0	0	0	0	0	0	0	0	0	0
506	0	0	0	0	0	0	0	0	0	0	0	0	0	0	0	0	0	0	0	0	0	0	0	0	0	0	0	0	0	0	0	0	0
507	0	0	0	0	0	0	0	0	0	0	0	0	0	0	0	0	0	0	0	0	0	0	0	0	0	0	0	0	0	0	0	0	0
508	0	0	0	0	0	0	0	0	0	0	0	0	0	0	0	0	0	0	0	0	0	0	0	0	0	0	0	0	0	0	0	0	0
509	0	0	0	0	0	0	0	0	0	0	0	0	0	0	0	0	0	0	0	0	0	0	0	0	0	0	0	0	0	0	0	0	0
510	0	0	0	0	0	0	0	0	0	0	0	0	0	0	0	0	0	0	0	0	0	0	0	0	0	0	0	0	0	0	0	0	0
511	0	0	0	0	0	0	0	0	0	0	0	0	0	0	0	0	0	0	0	0	0	0	0	0	0	0	0	0	0	0	0	0	0
512	0	0	0	0	0	0	0	0	0	0	0	0	0	0	0	0	0	0	0	0	0	0	0	0	0	0	0	0	0	0	0	0	0
513	0	0	0	0	0	0	0	0	0	0	0	0	0	0	0	0	0	0	0	0	0	0	0	0	0	0	0	0	0	0	0	0	0
514	0	0	0	0	0	0	0	0	0	0	0	0	0	0	0	0	0	0	0	0	0	0	0	0	0	0	0	0	0	0	0	0	0
515	0	0	0	0	0	0	0	0	0	0	0	0	0	0	0	0	0	0	0	0	0	0	0	0	0	0	0	0	0	0	0	0	0
516	0	0	0	0	0	0	0	0	0	0	0	0	0	0	0	0	0	0	0	0	0	0	0	0	0	0	0	0	0	0	0	0	0
517	0	0	0	0	0	0	0	0	0	0	0	0	0	0	0	0	0	0	0	0	0	0	0	0	0	0	0	0	0	0	0	0	0
518	0	0	0	0	0	0	0	0	0	0	0	0	0	0	0	0	0	0	0	0	0	0	0	0	0	0	0	0	0	0	0	0	0
519	0	0	0	0	0	0	0	0	0	0	0	0	0	0	0	0	0	0	0	0	0	0	0	0	0	0	0	0	0	0	0	0	0
520	0	0	0	0	0	0	0	0	0	0	0	0	0	0	0	0	0	0	0	0	0	0	0	0	0	0	0	0	0	0	0	0	0
521	0	0	0	0	0	0	0	0	0	0	0	0	0	0	0	0	0	0	0	0	0	0	0	0	0	0	0	0	0	0	0	0	0
522	0	0	0	0	0	0	0	0	0	0	0	0	0	0	0	0	0	0	0	0	0	0	0	0	0	0	0	0	0	0	0	0	0
523	0	0	0	0	0	0	0	0	0	0	0	0	0	0	0	0	0	0	0	0	0	0	0	0	0	0	0	0	0	0	0	0	0
524	0	0	0	0	0	0	0	0	0	0	0	0	0	0	0	0	0	0	0	0	0	0	0	0	0	0	0	0	0	0	0	0	0
525	0	0	0	0	0	0	0	0	0	0	0	0	0	0	0	0	0	0	0	0	0	0	0	0	0	0	0	0	0	0	0	0	0
526	0	0	0	0	0	0	0	0	0	0	0	0	0	0	0	0	0	0	0	0	0	0	0	0	0	0	0	0	0	0	0	0	0
527	0	0	0	0	0	0	0	0	0	0	0	0	0	0	0	0	0	0	0	0	0	0	0	0	0	0	0	0	0	0	0	0	0
528	0	0	0	0	0	0	0	0	0	0	0	0	0	0	0	0	0	0	0	0	0	0	0	0	0	0	0	0	0	0	0	0	0
529	0	0	0	0	0	0	0	0	0	0	0	0	0	0	0	0	0	0	0	0	0	0	0	0	0	0	0	0	0	0	0	0	0
530	0	0	0	0	0	0	0	0	0	0	0	0	0	0	0	0	0	0	0	0	0	0	0	0	0	0	0	0	0	0	0	0	0
531	0	0	0	0	0	0	0	0	0	0	0	0	0	0	0	0	0	0	0	0	0	0	0	0	0	0	0	0	0	0	0	0	0
532	0	0	0	0	0	0	0	0	0	0	0	0	0	0	0	0	0	0	0	0	0	0	0	0	0	0	0	0	0	0	0	0	0
533	0	0	0	0	0	0	0	0	0	0	0	0	0	0	0	0	0	0	0	0	0	0	0	0	0	0	0	0	0	0	0	0	0
534	0	0	0	0	0	0	0	0	0	0	0	0	0	0	0	0	0	0	0	0	0	0	0	0	0	0	0	0	0	0	0	0	0
535	0	0	0	0	0	0	0	0	0	0	0	0	0	0	0	0	0	0	0	0	0	0	0	0	0	0	0	0	0	0	0	0	0
536	0	0	0	0	0	0	0	0	0	0	0	0	0	0	0	0	0	0	0	0	0	0	0	0	0	0	0	0	0	0	0	0	0
537	0	0	0	0	0	0	0	0	0	0	0	0	0	0	0	0	0	0	0	0	0	0	0	0	0	0	0	0	0	0	0	0	0
538	0	0	0	0	0	0	0	0	0	0	0	0	0	0	0	0	0	0	0	0	0	0	0	0	0	0	0	0	0	0	0	0	0
539	0	0	0	0	0	0	0	0	0	0	0	0	0	0	0	0	0	0	0	0	0	0	0	0	0	0	0	0	0	0	0	0	0
540	0	0	0	0	0	0	0	0	0	0	0	0	0	0	0	0	0	0	0	0	0	0	0	0	0	0	0	0	0	0	0	0	0
541	0	0	0	0	0	0	0	0	0	0	0	0	0	0	0	0	0	0	0	0	0	0	0	0	0	0	0	0	0	0	0	0	0
542	0	0	0	0	0	0	0	0	0	0	0	0	0	0	0	0	0	0	0	0	0	0	0	0	0	0	0	0	0	0	0	0	0
543	0	0	0	0	0	0	0	0	0	0	0	0	0	0	0	0	0	0	0	0	0	0	0	0	0	0	0	0	0	0	0	0	0
544	0	0	0	0	0	0	0	0	0	0	0	0	0	0	0	0	0	0	0	0	0	0	0	0	0	0	0	0	0	0	0	0	0
545	0	0	0	0	0	0	0	0	0	0	0	0	0	0	0	0	0	0	0	0	0	0	0	0	0	0	0	0	0	0	0	0	0
546	0	0	0	0	0	0	0	0	0	0	0	0	0	0	0	0	0	0	0	0	0	0	0	0	0	0	0	0	0	0	0	0	0
547	0	0	0	0	0	0	0	0	0	0	0	0	0	0	0	0	0	0	0	0	0	0	0	0	0	0	0	0	0	0	0	0	0
548	0	0	0	0	0	0	0	0	0	0	0	0	0	0	0	0	0	0	0	0	0	0	0	0	0	0	0	0	0	0	0	0	0
549	0	0	0	0	0	0	0	0	0	0	0	0	0	0	0	0	0	0	0	0	0	0	0	0	0	0	0	0	0	0	0	0	0
550	0	0	0	0	0	0	0	0	0	0	0	0	0	0	0	0	0	0	0	0	0	0	0	0	0	0	0	0	0	0	0	0	0
551	0	0	0	0	0	0	0	0	0	0	0	0	0	0	0	0	0	0	0	0	0	0	0	0	0	0	0	0	0	0	0	0	0
552	0	0	0	0	0	0	0	0	0	0	0	0	0	0	0	0	0	0	0	0	0	0	0	0	0	0	0	0	0	0	0	0	0
553	0	0	0	0	0	0	0	0	0	0	0	0	0	0	0	0	0	0	0	0	0	0	0	0	0	0	0	0	0	0	0	0	0
554	0	0	0	0	0	0	0	0	0	0	0	0	0	0	0	0	0	0	0	0	0	0	0	0	0	0	0	0	0	0	0	0	0
555	0	0	0	0	0	0	0	0	0	0	0	0	0	0	0	0	0	0	0	0	0	0	0	0	0	0	0	0	0	0	0	0	0
556	0	0	0	0	0	0	0	0	0	0	0	0	0	0	0	0	0	0	0	0	0	0	0	0	0	0	0	0	0	0	0	0	0
557	0	0	0	0	0	0	0	0	0	0	0	0	0	0	0	0	0	0	0	0	0	0	0	0	0	0	0	0	0	0	0	0	0
558	0	0	0	0	0	0	0	0	0	0	0	0	0	0	0	0	0	0	0	0	0	0	0	0	0	0	0	0	0	0	0	0	0
559	0	0	0	0	0	0	0	0	0	0	0	0	0	0	0	0	0	0	0	0	0	0	0	0	0	0	0	0	0	0	0	0	0
560	0	0	0	0	0	0	0	0	0	0	0	0	0	0	0	0	0	0	0	0	0	0	0	0	0	0	0	0	0	0	0	0	0
561	0	0	0	0	0	0	0	0	0	0	0	0	0	0	0	0	0	0	0	0	0	0	0	0	0	0	0	0	0	0	0	0	0
562	0	0	0	0	0	0	0	0	0	0	0	0	0	0	0	0	0	0	0	0	0	0	0	0	0	0	0	0	0	0	0	0	0
563	0	0	0	0	0	0	0	0	0	0	0	0	0	0	0	0	0	0	0	0	0	0	0	0	0	0	0	0	0	0	0	0	0
564	0	0	0	0	0	0	0	0	0	0	0	0	0	0	0	0	0	0	0	0	0	0	0	0	0	0	0	0	0	0	0	0	0
565	0	0	0	0	0	0	0	0	0	0	0	0	0	0	0	0	0	0	0	0	0	0	0	0	0	0	0	0	0	0	0	0	0
566	0	0	0	0	0	0	0	0	0	0	0	0	0	0	0	0	0	0	0	0	0	0	0	0	0	0	0	0	0	0	0	0	0
567	0	0	0	0	0	0	0	0	0	0	0	0	0	0	0	0	0	0	0	0	0	0	0	0	0	0	0	0	0	0	0	0	0
568	0	0	0	0	0	0	0	0	0	0	0	0	0	0	0	0	0	0	0	0	0	0	0	0	0	0	0	0	0	0	0	0	0
569	0	0	0	0	0	0	0	0	0	0	0	0	0	0	0	0	0	0	0	0	0	0	0	0	0	0	0	0	0	0	0	0	0
570	0	0	0	0	0	0	0	0	0	0	0	0	0	0	0	0	0	0	0	0	0	0	0	0	0	0	0	0	0	0	0	0	0
571	0	0	0	0	0	0	0	0	0	0	0	0	0	0	0	0	0	0	0	0	0	0	0	0	0	0	0	0	0	0	0	0	0
572	0	0	0	0	0	0	0	0	0	0	0	0	0	0	0	0	0	0	0	0	0	0	0	0	0	0	0	0	0	0	0	0	0
573	0	0	0	0	0	0	0	0	0	0	0	0	0	0	0	0	0	0	0	0	0	0	0	0	0	0	0	0	0	0	0	0	0
574	0	0	0	0	0	0	0	0	0	0	0	0	0	0	0	0	0	0	0	0	0	0	0	0	0	0	0	0	0	0	0	0	0
575	0	0	0	0	0	0	0	0	0	0	0	0	0	0	0	0	0	0	0	0	0	0	0	0	0	0	0	0	0	0	0	0	0
576	0	0	0	0	0	0	0	0	0	0	0	0	0	0	0	0	0	0	0	0	0	0	0	0	0	0	0	0	0	0	0	0	0
577	0	0	0	0	0	0	0	0	0	0	0	0	0	0	0	0	0	0	0	0	0	0	0	0	0	0	0	0	0	0	0	0	0
578	0	0	0	0	0	0	0	0	0	0	0	0	0	0	0	0	0	0	0	0	0	0	0	0	0	0	0	0	0	0	0	0	0
579	0	0	0	0	0	0	0	0	0	0	0	0	0	0	0	0	0	0	0	0	0	0	0	0	0	0	0	0	0	0	0	0	0
580	0	0	0	0	0	0	0	0	0	0	0	0	0	0	0	0	0	0	0	0	0	0	0	0	0	0	0	0	0	0	0	0	0
581	0	0	0	0	0	0	0	0	0	0	0	0	0	0	0	0	0	0	0	0	0	0	0	0	0	0	0	0	0	0	0	0	0
582	0	0	0	0	0	0	0	0	0	0	0	0	0	0	0	0	0	0	0	0	0	0	0	0	0	0	0	0	0	0	0	0	0
583	0	0	0	0	0	0	0	0	0	0	0	0	0	0	0	0	0	0	0	0	0	0	0	0	0	0	0	0	0	0	0	0	0
584	0	0	0	0	0	0	0	0	0	0	0	0	0	0	0	0	0	0	0	0	0	0	0	0	0	0	0	0	0	0	0	0	0
585	0	0	0	0	0	0	0	0	0	0	0	0	0	0	0	0	0	0	0	0	0	0	0	0	0	0	0	0	0	0	0	0	0
586	0	0	0	0	0	0	0	0	0	0	0	0	0	0	0	0	0	0	0	0	0	0	0	0	0	0	0	0	0	0	0	0	0
587	0	0	0	0	0	0	0	0	0	0	0	0	0	0	0	0	0	0	0	0	0	0	0	0	0	0	0	0	0	0	0	0	0
588	0	0	0	0	0	0	0	0	0	0	0	0	0	0	0	0	0	0	0	0	0	0	0	0	0	0	0	0	0	0	0	0	0
589	0	0	0	0	0	0	0	0	0	0	0	0	0	0	0	0	0	0	0	0	0	0	0	0	0	0	0	0	0	0	0	0	0
590	0	0	0	0	0	0	0	0	0	0	0	0	0	0	0	0	0	0	0	0	0	0	0	0	0	0	0	0	0	0	0	0	0
591	0	0	0	0	0	0	0	0	0	0	0	0	0	0	0	0	0	0	0	0	0	0	0	0	0	0	0	0	0	0	0	0	0
592	0	0	0	0	0	0	0	0	0	0	0	0	0	0	0	0	0	0	0	0	0	0	0	0	0	0	0	0	0	0	0	0	0
593	0	0	0	0	0	0	0	0	0	0	0	0	0	0	0	0	0	0	0	0	0	0	0	0	0	0	0	0	0	0	0	0	0
594	0	0	0	0	0	0	0	0	0	0	0	0	0	0	0	0	0	0	0	0	0	0	0	0	0	0	0	0	0	0	0	0	0
595	0	0	0	0	0	0	0	0	0	0	0	0	0	0	0	0	0	0	0	0	0	0	0	0	0	0	0	0	0	0	0	0	0
596	0	0	0	0	0	0	0	0	0	0	0	0	0	0	0	0	0	0	0	0	0	0	0	0	0	0	0	0	0	0	0	0	0
597	0	0	0	0	0	0	0	0	0	0	0	0	0	0	0	0	0	0	0	0	0	0	0	0	0	0	0	0	0	0	0	0	0
598	0	0	0	0	0	0	0	0	0	0	0	0	0	0	0	0	0	0	0	0	0	0	0	0	0	0	0	0	0	0	0	0	0
599	0	0	0	0	0	0	0	0	0	0	0	0	0	0	0	0	0	0	0	0	0	0	0	0	0	0	0	0	0	0	0	0	0
600	0	0	0	0	0	0	0	0	0	0	0	0	0	0	0	0	0	0	0	0	0	0	0	0	0	0	0	0	0	0	0	0	0
601	0	0	0	0	0	0	0	0	0	0	0	0	0	0	0	0	0	0	0	0	0	0	0	0	0	0	0	0	0	0	0	0	0
602	0	0	0	0	0	0	0	0	0	0	0	0	0	0	0	0	0	0	0	0	0	0	0	0	0	0	0	0	0	0	0	0	0
603	0	0	0	0	0	0	0	0	0	0	0	0	0	0	0	0	0	0	0	0	0	0	0	0	0	0	0	0	0	0	0	0	0
604	0	0	0	0	0	0	0	0	0	0	0	0	0	0	0	0	0	0	0	0	0	0	0	0	0	0	0	0	0	0	0	0	0
605	0	0	0	0	0	0	0	0	0	0	0	0	0	0	0	0	0	0	0	0	0	0	0	0	0	0	0	0	0	0	0	0	0
606	0	0	0	0	0	0	0	0	0	0	0	0	0	0	0	0	0	0	0	0	0	0	0	0	0	0	0	0	0	0	0	0	0
607	0	0	0	0	0	0	0	0	0	0	0	0	0	0	0	0	0	0	0	0	0	0	0	0	0	0	0	0	0	0	0	0	0
608	0	0	0	0	0	0	0	0	0	0	0	0	0	0	0	0	0	0	0	0	0	0	0	0	0	0	0	0	0	0	0	0	0
609	0	0	0	0	0	0	0	0	0	0	0	0	0	0	0	0	0	0	0	0	0	0	0	0	0	0	0	0	0	0	0	0	0
610	0	0	0	0	0	0	0	0	0	0	0	0	0	0	0	0	0	0	0	0	0	0	0	0	0	0	0	0	0	0	0	0	0
611	0	0	0	0	0	0	0	0	0	0	0	0	0	0	0	0	0	0	0	0	0	0	0	0	0	0	0	0	0	0	0	0	0
612	0	0	0	0	0	0	0	0	0	0	0	0	0	0	0	0	0	0	0	0	0	0	0	0	0	0	0	0	0	0	0	0	0
613	0	0	0	0	0	0	0	0	0	0	0	0	0	0	0	0	0	0	0	0	0	0	0	0	0	0	0	0	0	0	0	0	0
614	0	0	0	0	0	0	0	0	0	0	0	0	0	0	0	0	0	0	0	0	0	0	0	0	0	0	0	0	0	0	0	0	0
615	0	0	0	0	0	0	0	0	0	0	0	0	0	0	0	0	0	0	0	0	0	0	0	0	0	0	0	0	0	0	0	0	0
616	0	0	0	0	0	0	0	0	0	0	0	0	0	0	0	0	0	0	0	0	0	0	0	0	0	0	0	0	0	0	0	0	0
617	0	0	0	0	0	0	0	0	0	0	0	0	0	0	0	0	0	0	0	0	0	0	0	0	0	0	0	0	0	0	0	0	0
618	0	0	0	0	0	0	0	0	0	0	0	0	0	0	0	0	0	0	0	0	0	0	0	0	0	0	0	0	0	0	0	0	0
619	0	0	0	0	0	0	0	0	0	0	0	0	0	0	0	0	0	0	0	0	0	0	0	0	0	0	0	0	0	0	0	0	0
620	0	0	0	0	0	0	0	0	0	0	0	0	0	0	0	0	0	0	0	0	0	0	0	0	0	0	0	0	0	0	0	0	0
621	0	0	0	0	0	0	0	0	0	0	0	0	0	0	0	0	0	0	0	0	0	0	0	0	0	0	0	0	0	0	0	0	0
622	0	0	0	0	0	0	0	0	0	0	0	0	0	0	0	0	0	0	0	0	0	0	0	0	0	0	0	0	0	0	0	0	0
623	0	0	0	0	0	0	0	0	0	0	0	0	0	0	0	0	0	0	0	0	0	0	0	0	0	0	0	0	0	0	0	0	0
624	0	0	0	0	0	0	0	0	0	0	0	0	0	0	0	0	0	0	0	0	0	0	0	0	0	0	0	0	0	0	0	0	0
625	0	0	0	0	0	0	0	0	0	0	0	0	0	0	0	0	0	0	0	0	0	0	0	0	0	0	0	0	0	0	0	0	0
626	0	0	0	0	0	0	0	0	0	0	0	0	0	0	0	0	0	0	0	0	0	0	0	0	0	0	0	0	0	0	0	0	0
627	0	0	0	0	0	0	0	0	0	0	0	0	0	0	0	0	0	0	0	0	0	0	0	0	0	0	0	0	0	0	0	0	0
628	0	0	0	0	0	0	0	0	0	0	0	0	0	0	0	0	0	0	0	0	0	0	0	0	0	0	0	0	0	0	0	0	0
629	0	0	0	0	0	0	0	0	0	0	0	0	0	0	0	0	0	0	0	0	0	0	0	0	0	0	0	0	0	0	0	0	0
630	0	0	0	0	0	0	0	0	0	0	0	0	0	0	0	0	0	0	0	0	0	0	0	0	0	0	0	0	0	0	0	0	0
631	0	0	0	0	0	0	0	0	0	0	0	0	0	0	0	0	0	0	0	0	0	0	0	0	0	0	0	0	0	0	0	0	0
632	0	0	0	0	0	0	0	0	0	0	0	0	0	0	0	0	0	0	0	0	0	0	0	0	0	0	0	0	0	0	0	0	0
633	0	0	0	0	0	0	0	0	0	0	0	0	0	0	0	0	0	0	0	0	0	0	0	0	0	0	0	0	0	0	0	0	0
634	0	0	0	0	0	0	0	0	0	0	0	0	0	0	0	0	0	0	0	0	0	0	0	0	0	0	0	0	0	0	0	0	0
635	0	0	0	0	0	0	0	0	0	0	0	0	0	0	0	0	0	0	0	0	0	0	0	0	0	0	0	0	0	0	0	0	0
636	0	0	0	0	0	0	0	0	0	0	0	0	0	0	0	0	0	0	0	0	0	0	0	0	0	0	0	0	0	0	0	0	0
637	0	0	0	0	0	0	0	0	0	0	0	0	0	0	0	0	0	0	0	0	0	0	0	0	0	0	0	0	0	0	0	0	0
638	0	0	0	0	0	0	0	0	0	0	0	0	0	0	0	0	0	0	0	0	0	0	0	0	0	0	0	0	0	0	0	0	0
639	0	0	0	0	0	0	0	0	0	0	0	0	0	0	0	0	0	0	0	0	0	0	0	0	0	0	0	0	0	0	0	0	0
640	0	0	0	0	0	0	0	0	0	0	0	0	0	0	0	0	0	0	0	0	0	0	0	0	0	0	0	0	0	0	0	0	0
641	0	0	0	0	0	0	0	0	0	0	0	0	0	0	0	0	0	0	0	0	0	0	0	0	0	0	0	0	0	0	0	0	0
642	0	0	0	0	0	0	0	0	0	0	0	0	0	0	0	0	0	0	0	0	0	0	0	0	0	0	0	0	0	0	0	0	0
643	0	0	0	0	0	0	0	0	0	0	0	0	0	0	0	0	0	0	0	0	0	0	0	0	0	0	0	0	0	0	0	0	0
644	0	0	0	0	0	0	0	0	0	0	0	0	0	0	0	0	0	0	0	0	0	0	0	0	0	0	0	0	0	0	0	0	0
645	0	0	0	0	0	0	0	0	0	0	0	0	0	0	0	0	0	0	0	0	0	0	0	0	0	0	0	0	0	0	0	0	0
646	0	0	0	0	0	0	0	0	0	0	0	0	0	0	0	0	0	0	0	0	0	0	0	0	0	0	0	0	0	0	0	0	0
647	0	0	0	0	0	0	0	0	0	0	0	0	0	0	0	0	0	0	0	0	0	0	0	0	0	0	0	0	0	0	0	0	0
648	0	0	0	0	0	0	0	0	0	0	0	0	0	0	0	0	0	0	0	0	0	0	0	0	0	0	0	0	0	0	0	0	0
649	0	0	0	0	0	0	0	0	0	0	0	0	0	0	0	0	0	0	0	0	0	0	0	0	0	0	0	0	0	0	0	0	0
650	0	0	0	0	0	0	0	0	0	0	0	0	0	0	0	0	0	0	0	0	0	0	0	0	0	0	0	0	0	0	0	0	0
651	0	0	0	0	0	0	0	0	0	0	0	0	0	0	0	0	0	0	0	0	0	0	0	0	0	0	0	0	0	0	0	0	0
652	0	0	0	0	0	0	0	0	0	0	0	0	0	0	0	0	0	0	0	0	0	0	0	0	0	0	0	0	0	0	0	0	0
653	0	0	0	0	0	0	0	0	0	0	0	0	0	0	0	0	0	0	0	0	0	0	0	0	0	0	0	0	0	0	0	0	0
654	0	0	0	0	0	0	0	0	0	0	0	0	0	0	0	0	0	0	0	0	0	0	0	0	0	0	0	0	0	0	0	0	0
655	0	0	0	0	0	0	0	0	0	0	0	0	0	0	0	0	0	0	0	0	0	0	0	0	0	0	0	0	0	0	0	0	0
656	0	0	0	0	0	0	0	0	0	0	0	0	0	0	0	0	0	0	0	0	0	0	0	0	0	0	0	0	0	0	0	0	0
657	0	0	0	0	0	0	0	0	0	0	0	0	0	0	0	0	0	0	0	0	0	0	0	0	0	0	0	0	0	0	0	0	0
658	0	0	0	0	0	0	0	0	0	0	0	0	0	0	0	0	0	0	0	0	0	0	0	0	0	0	0	0	0	0	0	0	0
659	0	0	0	0	0	0	0	0	0	0	0	0	0	0	0	0	0	0	0	0	0	0	0	0	0	0	0	0	0	0	0	0	0
660	0	0	0	0	0	0	0	0	0	0	0	0	0	0	0	0	0	0	0	0	0	0	0	0	0	0	0	0	0	0	0	0	0
661	0	0	0	0	0	0	0	0	0	0	0	0	0	0	0	0	0	0	0	0	0	0	0	0	0	0	0	0	0	0	0	0	0
662	0	0	0	0	0	0	0	0	0	0	0	0	0	0	0	0	0	0	0	0	0	0	0	0	0	0	0	0	0	0	0	0	0
663	0	0	0	0	0	0	0	0	0	0	0	0	0	0	0	0	0	0	0	0	0	0	0	0	0	0	0	0	0	0	0	0	0
664	0	0	0	0	0	0	0	0	0	0	0	0	0	0	0	0	0	0	0	0	0	0	0	0	0	0	0	0	0	0	0	0	0
665	0	0	0	0	0	0	0	0	0	0	0	0	0	0	0	0	0	0	0	0	0	0	0	0	0	0	0	0	0	0	0	0	0
666	0	0	0	0	0	0	0	0	0	0	0	0	0	0	0	0	0	0	0	0	0	0	0	0	0	0	0	0	0	0	0	0	0
667	0	0	0	0	0	0	0	0	0	0	0	0	0	0	0	0	0	0	0	0	0	0	0	0	0	0	0	0	0	0	0	0	0
668	0	0	0	0	0	0	0	0	0	0	0	0	0	0	0	0	0	0	0	0	0	0	0	0	0	0	0	0	0	0	0	0	0
669	0	0	0	0	0	0	0	0	0	0	0	0	0	0	0	0	0	0	0	0	0	0	0	0	0	0	0	0	0	0	0	0	0
670	0	0	0	0	0	0	0	0	0	0	0	0	0	0	0	0	0	0	0	0	0	0	0	0	0	0	0	0	0	0	0	0	0
671	0	0	0	0	0	0	0	0	0	0	0	0	0	0	0	0	0	0	0	0	0	0	0	0	0	0	0	0	0	0	0	0	0
672	0	0	0	0	0	0	0	0	0	0	0	0	0	0	0	0	0	0	0	0	0	0	0	0	0	0	0	0	0	0	0	0	0
673	0	0	0	0	0	0	0	0	0	0	0	0	0	0	0	0	0	0	0	0	0	0	0	0	0	0	0	0	0	0	0	0	0
674	0	0	0	0	0	0	0	0	0	0	0	0	0	0	0	0	0	0	0	0	0	0	0	0	0	0	0	0	0	0	0	0	0
675	0	0	0	0	0	0	0	0	0	0	0	0	0	0	0	0	0	0	0	0	0	0	0	0	0	0	0	0	0	0	0	0	0
676	0	0	0	0	0	0	0	0	0	0	0	0	0	0	0	0	0	0	0	0	0	0	0	0	0	0	0	0	0	0	0	0	0
677	0	0	0	0	0	0	0	0	0	0	0	0	0	0	0	0	0	0	0	0	0	0	0	0	0	0	0	0	0	0	0	0	0
678	0	0	0	0	0	0	0	0	0	0	0	0	0	0	0	0	0	0	0	0	0	0	0	0	0	0	0	0	0	0	0	0	0
679	0	0	0	0	0	0	0	0	0	0	0	0	0	0	0	0	0	0	0	0	0	0	0	0	0	0	0	0	0	0	0	0	0
680	0	0	0	0	0	0	0	0	0	0	0	0	0	0	0	0	0	0	0	0	0	0	0	0	0	0	0	0	0	0	0	0	0
681	0	0	0	0	0	0	0	0	0	0	0	0	0	0	0	0	0	0	0	0	0	0	0	0	0	0	0	0	0	0	0	0	0
682	0	0	0	0	0	0	0	0	0	0	0	0	0	0	0	0	0	0	0	0	0	0	0	0	0	0	0	0	0	0	0	0	0
683	0	0	0	0	0	0	0	0	0	0	0	0	0	0	0	0	0	0	0	0	0	0	0	0	0	0	0	0	0	0	0	0	0
684	0	0	0	0	0	0	0	0	0	0	0	0	0	0	0	0	0	0	0	0	0	0	0	0	0	0	0	0	0	0	0	0	0
685	0	0	0	0	0	0	0	0	0	0	0	0	0	0	0	0	0	0	0	0	0	0	0	0	0	0	0	0	0	0	0	0	0
686	0	0	0	0	0	0	0	0	0	0	0	0	0	0	0	0	0	0	0	0	0	0	0	0	0	0	0	0	0	0	0	0	0
687	0	0	0	0	0	0	0	0	0	0	0	0	0	0	0	0	0	0	0	0	0	0	0	0	0	0	0	0	0	0	0	0	0
688	0	0	0	0	0	0	0	0	0	0	0	0	0	0	0	0	0	0	0	0	0	0	0	0	0	0	0	0	0	0	0	0	0
689	0	0	0	0	0	0	0	0	0	0	0	0	0	0	0	0	0	0	0	0	0	0	0	0	0	0	0	0	0	0	0	0	0
690	0	0	0	0	0	0	0	0	0	0	0	0	0	0	0	0	0	0	0	0	0	0	0	0	0	0	0	0	0	0	0	0	0
691	0	0	0	0	0	0	0	0	0	0	0	0	0	0	0	0	0	0	0	0	0	0	0	0	0	0	0	0	0	0	0	0	0
692	0	0	0	0	0	0	0	0	0	0	0	0	0	0	0	0	0	0	0	0	0	0	0	0	0	0	0	0	0	0	0	0	0
693	0	0	0	0	0	0	0	0	0	0	0	0	0	0	0	0	0	0	0	0	0	0	0	0	0	0	0	0	0	0	0	0	0
694	0	0	0	0	0	0	0	0	0	0	0	0	0	0	0	0	0	0	0	0	0	0	0	0	0	0	0	0	0	0	0	0	0
695	0	0	0	0	0	0	0	0	0	0	0	0	0	0	0	0	0	0	0	0	0	0	0	0	0	0	0	0	0	0	0	0	0
696	0	0	0	0	0	0	0	0	0	0	0	0	0	0	0	0	0	0	0	0	0	0	0	0	0	0	0	0	0	0	0	0	0
697	0	0	0	0	0	0	0	0	0	0	0	0	0	0	0	0	0	0	0	0	0	0	0	0	0	0	0	0	0	0	0	0	0
698	0	0	0	0	0	0	0	0	0	0	0	0	0	0	0	0	0	0	0	0	0	0	0	0	0	0	0	0	0	0	0	0	0
699	0	0	0	0	0	0	0	0	0	0	0	0	0	0	0	0	0	0	0	0	0	0	0	0	0	0	0	0	0	0	0	0	0
700	0	0	0	0	0	0	0	0	0	0	0	0	0	0	0	0	0	0	0	0	0	0	0	0	0	0	0	0	0	0	0	0	0
701	0	0	0	0	0	0	0	0	0	0	0	0	0	0	0	0	0	0	0	0	0	0	0	0	0	0	0	0	0	0	0	0	0
702	0	0	0	0	0	0	0	0	0	0	0	0	0	0	0	0	0	0	0	0	0	0	0	0	0	0	0	0	0	0	0	0	0
703	0	0	0	0	0	0	0	0	0	0	0	0	0	0	0	0	0	0	0	0	0	0	0	0	0	0	0	0	0	0	0	0	0
704	0	0	0	0	0	0	0	0	0	0	0	0	0	0	0	0	0	0	0	0	0	0	0	0	0	0	0	0	0	0	0	0	0
705	0	0	0	0	0	0	0	0	0	0	0	0	0	0	0	0	0	0	0	0	0	0	0	0	0	0	0	0	0	0	0	0	0
706	0	0	0	0	0	0	0	0	0	0	0	0	0	0	0	0	0	0	0	0	0	0	0	0	0	0	0	0	0	0	0	0	0
707	0	0	0	0	0	0	0	0	0	0	0	0	0	0	0	0	0	0	0	0	0	0	0	0	0	0	0	0	0	0	0	0	0
708	0	0	0	0	0	0	0	0	0	0	0	0	0	0	0	0	0	0	0	0	0	0	0	0	0	0	0	0	0	0	0	0	0
709	0	0	0	0	0	0	0	0	0	0	0	0	0	0	0	0	0	0	0	0	0	0	0	0	0	0	0	0	0	0	0	0	0
710	0	0	0	0	0	0	0	0	0	0	0	0	0	0	0	0	0	0	0	0	0	0	0	0	0	0	0	0	0	0	0	0	0
711	0	0	0	0	0	0	0	0	0	0	0	0	0	0	0	0	0	0	0	0	0	0	0	0	0	0	0	0	0	0	0	0	0
712	0	0	0	0	0	0	0	0	0	0	0	0	0	0	0	0	0	0	0	0	0	0	0	0	0	0	0	0	0	0	0	0	0
713	0	0	0	0	0	0	0	0	0	0	0	0	0	0	0	0	0	0	0	0	0	0	0	0	0	0	0	0	0	0	0	0	0
714	0	0	0	0	0	0	0	0	0	0	0	0	0	0	0	0	0	0	0	0	0	0	0	0	0	0	0	0	0	0	0	0	0
715	0	0	0	0	0	0	0	0	0	0	0	0	0	0	0	0	0	0	0	0	0	0	0	0	0	0	0	0	0	0	0	0	0
716	0	0	0	0	0	0	0	0	0	0	0	0	0	0	0	0	0	0	0	0	0	0	0	0	0	0	0	0	0	0	0	0	0
717	0	0	0	0	0	0	0	0	0	0	0	0	0	0	0	0	0	0	0	0	0	0	0	0	0	0	0	0	0	0	0	0	0
718	0	0	0	0	0	0	0	0	0	0	0	0	0	0	0	0	0	0	0	0	0	0	0	0	0	0	0	0	0	0	0	0	0
719	0	0	0	0	0	0	0	0	0	0	0	0	0	0	0	0	0	0	0	0	0	0	0	0	0	0	0	0	0	0	0	0	0
720	0	0	0	0	0	0	0	0	0	0	0	0	0	0	0	0	0	0	0	0	0	0	0	0	0	0	0	0	0	0	0	0	0
721	0	0	0	0	0	0	0	0	0	0	0	0	0	0	0	0	0	0	0	0	0	0	0	0	0	0	0	0	0	0	0	0	0
722	0	0	0	0	0	0	0	0	0	0	0	0	0	0	0	0	0	0	0	0	0	0	0	0	0	0	0	0	0	0	0	0	0
723	0	0	0	0	0	0	0	0	0	0	0	0	0	0	0	0	0	0	0	0	0	0	0	0	0	0	0	0	0	0	0	0	0
724	0	0	0	0	0	0	0	0	0	0	0	0	0	0	0	0	0	0	0	0	0	0	0	0	0	0	0	0	0	0	0	0	0
725	0	0	0	0	0	0	0	0	0	0	0	0	0	0	0	0	0	0	0	0	0	0	0	0	0	0	0	0	0	0	0	0	0
726	0	0	0	0	0	0	0	0	0	0	0	0	0	0	0	0	0	0	0	0	0	0	0	0	0	0	0	0	0	0	0	0	0
727	0	0	0	0	0	0	0	0	0	0	0	0	0	0	0	0	0	0	0	0	0	0	0	0	0	0	0	0	0	0	0	0	0
728	0	0	0	0	0	0	0	0	0	0	0	0	0	0	0	0	0	0	0	0	0	0	0	0	0	0	0	0	0	0	0	0	0
729	0	0	0	0	0	0	0	0	0	0	0	0	0	0	0	0	0	0	0	0	0	0	0	0	0	0	0	0	0	0	0	0	0
730	0	0	0	0	0	0	0	0	0	0	0	0	0	0	0	0	0	0	0	0	0	0	0	0	0	0	0	0	0	0	0	0	0
731	0	0	0	0	0	0	0	0	0	0	0	0	0	0	0	0	0	0	0	0	0	0	0	0	0	0	0	0	0	0	0	0	0
732	0	0	0	0	0	0	0	0	0	0	0	0	0	0	0	0	0	0	0	0	0	0	0	0	0	0	0	0	0	0	0	0	0
733	0	0	0	0	0	0	0	0	0	0	0	0	0	0	0	0	0	0	0	0	0	0	0	0	0	0	0	0	0	0	0	0	0
734	0	0	0	0	0	0	0	0	0	0	0	0	0	0	0	0	0	0	0	0	0	0	0	0	0	0	0	0	0	0	0	0	0
735	0	0	0	0	0	0	0	0	0	0	0	0	0	0	0	0	0	0	0	0	0	0	0	0	0	0	0	0	0	0	0	0	0
736	0	0	0	0	0	0	0	0	0	0	0	0	0	0	0	0	0	0	0	0	0	0	0	0	0	0	0	0	0	0	0	0	0
737	0	0	0	0	0	0	0	0	0	0	0	0	0	0	0	0	0	0	0	0	0	0	0	0	0	0	0	0	0	0	0	0	0
738	0	0	0	0	0	0	0	0	0	0	0	0	0	0	0	0	0	0	0	0	0	0	0	0	0	0	0	0	0	0	0	0	0
739	0	0	0	0	0	0	0	0	0	0	0	0	0	0	0	0	0	0	0	0	0	0	0	0	0	0	0	0	0	0	0	0	0
740	0	0	0	0	0	0	0	0	0	0	0	0	0	0	0	0	0	0	0	0	0	0	0	0	0	0	0	0	0	0	0	0	0
741	0	0	0	0	0	0	0	0	0	0	0	0	0	0	0	0	0	0	0	0	0	0	0	0	0	0	0	0	0	0	0	0	0
742	0	0	0	0	0	0	0	0	0	0	0	0	0	0	0	0	0	0	0	0	0	0	0	0	0	0	0	0	0	0	0	0	0
743	0	0	0	0	0	0	0	0	0	0	0	0	0	0	0	0	0	0	0	0	0	0	0	0	0	0	0	0	0	0	0	0	0
744	0	0	0	0	0	0	0	0	0	0	0	0	0	0	0	0	0	0	0	0	0	0	0	0	0	0	0	0	0	0	0	0	0
745	0	0	0	0	0	0	0	0	0	0	0	0	0	0	0	0	0	0	0	0	0	0	0	0	0	0	0	0	0	0	0	0	0
746	0	0	0	0	0	0	0	0	0	0	0	0	0	0	0	0	0	0	0	0	0	0	0	0	0	0	0	0	0	0	0	0	0
747	0	0	0	0	0	0	0	0	0	0	0	0	0	0	0	0	0	0	0	0	0	0	0	0	0	0	0	0	0	0	0	0	0
748	0	0	0	0	0	0	0	0	0	0	0	0	0	0	0	0	0	0	0	0	0	0	0	0	0	0	0	0	0	0	0	0	0
749	0	0	0	0	0	0	0	0	0	0	0	0	0	0	0	0	0	0	0	0	0	0	0	0	0	0	0	0	0	0	0	0	0
750	0	0	0	0	0	0	0	0	0	0	0	0	0	0	0	0	0	0	0	0	0	0	0	0	0	0	0	0	0	0	0	0	0
751	0	0	0	0	0	0	0	0	0	0	0	0	0	0	0	0	0	0	0	0	0	0	0	0	0	0	0	0	0	0	0	0	0
752	0	0	0	0	0	0	0	0	0	0	0	0	0	0	0	0	0	0	0	0	0	0	0	0	0	0	0	0	0	0	0	0	0
753	0	0	0	0	0	0	0	0	0	0	0	0	0	0	0	0	0	0	0	0	0	0	0	0	0	0	0	0	0	0	0	0	0
754	0	0	0	0	0	0	0	0	0	0	0	0	0	0	0	0	0	0	0	0	0	0	0	0	0	0	0	0	0	0	0	0	0
755	0	0	0	0	0	0	0	0	0	0	0	0	0	0	0	0	0	0	0	0	0	0	0	0	0	0	0	0	0	0	0	0	0
756	0	0	0	0	0	0	0	0	0	0	0	0	0	0	0	0	0	0	0	0	0	0	0	0	0	0	0	0	0	0	0	0	0
757	0	0	0	0	0	0	0	0	0	0	0	0	0	0	0	0	0	0	0	0	0	0	0	0	0	0	0	0	0	0	0	0	0
758	0	0	0	0	0	0	0	0	0	0	0	0	0	0	0	0	0	0	0	0	0	0	0	0	0	0	0	0	0	0	0	0	0
759	0	0	0	0	0	0	0	0	0	0	0	0	0	0	0	0	0	0	0	0	0	0	0	0	0	0	0	0	0	0	0	0	0
760	0	0	0	0	0	0	0	0	0	0	0	0	0	0	0	0	0	0	0	0	0	0	0	0	0	0	0	0	0	0	0	0	0
761	0	0	0	0	0	0	0	0	0	0	0	0	0	0	0	0	0	0	0	0	0	0	0	0	0	0	0	0	0	0	0	0	0
762	0	0	0	0	0	0	0	0	0	0	0	0	0	0	0	0	0	0	0	0	0	0	0	0	0	0	0	0	0	0	0	0	0
763	0	0	0	0	0	0	0	0	0	0	0	0	0	0	0	0	0	0	0	0	0	0	0	0	0	0	0	0	0	0	0	0	0
764	0	0	0	0	0	0	0	0	0	0	0	0	0	0	0	0	0	0	0	0	0	0	0	0	0	0	0	0	0	0	0	0	0
765	0	0	0	0	0	0	0	0	0	0	0	0	0	0	0	0	0	0	0	0	0	0	0	0	0	0	0	0	0	0	0	0	0
766	0	0	0	0	0	0	0	0	0	0	0	0	0	0	0	0	0	0	0	0	0	0	0	0	0	0	0	0	0	0	0	0	0
767	0	0	0	0	0	0	0	0	0	0	0	0	0	0	0	0	0	0	0	0	0	0	0	0	0	0	0	0	0	0	0	0	0
768	0	0	0	0	0	0	0	0	0	0	0	0	0	0	0	0	0	0	0	0	0	0	0	0	0	0	0	0	0	0	0	0	0
769	0	0	0	0	0	0	0	0	0	0	0	0	0	0	0	0	0	0	0	0	0	0	0	0	0	0	0	0	0	0	0	0	0
770	0	0	0	0	0	0	0	0	0	0	0	0	0	0	0	0	0	0	0	0	0	0	0	0	0	0	0	0	0	0	0	0	0
771	0	0	0	0	0	0	0	0	0	0	0	0	0	0	0	0	0	0	0	0	0	0	0	0	0	0	0	0	0	0	0	0	0
772	0	0	0	0	0	0	0	0	0	0	0	0	0	0	0	0	0	0	0	0	0	0	0	0	0	0	0	0	0	0	0	0	0
773	0	0	0	0	0	0	0	0	0	0	0	0	0	0	0	0	0	0	0	0	0	0	0	0	0	0	0	0	0	0	0	0	0
774	0	0	0	0	0	0	0	0	0	0	0	0	0	0	0	0	0	0	0	0	0	0	0	0	0	0	0	0	0	0	0	0	0
775	0	0	0	0	0	0	0	0	0	0	0	0	0	0	0	0	0	0	0	0	0	0	0	0	0	0	0	0	0	0	0	0	0
776	0	0	0	0	0	0	0	0	0	0	0	0	0	0	0	0	0	0	0	0	0	0	0	0	0	0	0	0	0	0	0	0	0
777	0	0	0	0	0	0	0	0	0	0	0	0	0	0	0	0	0	0	0	0	0	0	0	0	0	0	0	0	0	0	0	0	0
778	0	0	0	0	0	0	0	0	0	0	0	0	0	0	0	0	0	0	0	0	0	0	0	0	0	0	0	0	0	0	0	0	0
779	0	0	0	0	0	0	0	0	0	0	0	0	0	0	0	0	0	0	0	0	0	0	0	0	0	0	0	0	0	0	0	0	0
780	0	0	0	0	0	0	0	0	0	0	0	0	0	0	0	0	0	0	0	0	0	0	0	0	0	0	0	0	0	0	0	0	0
781	0	0	0	0	0	0	0	0	0	0	0	0	0	0	0	0	0	0	0	0	0	0	0	0	0	0	0	0	0	0	0	0	0
782	0	0	0	0	0	0	0	0	0	0	0	0	0	0	0	0	0	0	0	0	0	0	0	0	0	0	0	0	0	0	0	0	0
783	0	0	0	0	0	0	0	0	0	0	0	0	0	0	0	0	0	0	0	0	0	0	0	0	0	0	0	0	0	0	0	0	0
784	0	0	0	0	0	0	0	0	0	0	0	0	0	0	0	0	0	0	0	0	0	0	0	0	0	0	0	0	0	0	0	0	0
785	0	0	0	0	0	0	0	0	0	0	0	0	0	0	0	0	0	0	0	0	0	0	0	0	0	0	0	0	0	0	0	0	0
786	0	0	0	0	0	0	0	0	0	0	0	0	0	0	0	0	0	0	0	0	0	0	0	0	0	0	0	0	0	0	0	0	0
787	0	0	0	0	0	0	0	0	0	0	0	0	0	0	0	0	0	0	0	0	0	0	0	0	0	0	0	0	0	0	0	0	0
788	0	0	0	0	0	0	0	0	0	0	0	0	0	0	0	0	0	0	0	0	0	0	0	0	0	0	0	0	0	0	0	0	0
789	0	0	0	0	0	0	0	0	0	0	0	0	0	0	0	0	0	0	0	0	0	0	0	0	0	0	0	0	0	0	0	0	0
790	0	0	0	0	0	0	0	0	0	0	0	0	0	0	0	0	0	0	0	0	0	0	0	0	0	0	0	0	0	0	0	0	0
791	0	0	0	0	0	0	0	0	0	0	0	0	0	0	0	0	0	0	0	0	0	0	0	0	0	0	0	0	0	0	0	0	0
792	0	0	0	0	0	0	0	0	0	0	0	0	0	0	0	0	0	0	0	0	0	0	0	0	0	0	0	0	0	0	0	0	0
793	0	0	0	0	0	0	0	0	0	0	0	0	0	0	0	0	0	0	0	0	0	0	0	0	0	0	0	0	0	0	0	0	0
794	0	0	0	0	0	0	0	0	0	0	0	0	0	0	0	0	0	0	0	0	0	0	0	0	0	0	0	0	0	0	0	0	0
795	0	0	0	0	0	0	0	0	0	0	0	0	0	0	0	0	0	0	0	0	0	0	0	0	0	0	0	0	0	0	0	0	0
796	0	0	0	0	0	0	0	0	0	0	0	0	0	0	0	0	0	0	0	0	0	0	0	0	0	0	0	0	0	0	0	0	0
797	0	0	0	0	0	0	0	0	0	0	0	0	0	0	0	0	0	0	0	0	0	0	0	0	0	0	0	0	0	0	0	0	0
798	0	0	0	0	0	0	0	0	0	0	0	0	0	0	0	0	0	0	0	0	0	0	0	0	0	0	0	0	0	0	0	0	0
799	0	0	0	0	0	0	0	0	0	0	0	0	0	0	0	0	0	0	0	0	0	0	0	0	0	0	0	0	0	0	0	0	0
800	0	0	0	0	0	0	0	0	0	0	0	0	0	0	0	0	0	0	0	0	0	0	0	0	0	0	0	0	0	0	0	0	0
801	0	0	0	0	0	0	0	0	0	0	0	0	0	0	0	0	0	0	0	0	0	0	0	0	0	0	0	0	0	0	0	0	0
802	0	0	0	0	0	0	0	0	0	0	0	0	0	0	0	0	0	0	0	0	0	0	0	0	0	0	0	0	0	0	0	0	0
803	0	0	0	0	0	0	0	0	0	0	0	0	0	0	0	0	0	0	0	0	0	0	0	0	0	0	0	0	0	0	0	0	0
804	0	0	0	0	0	0	0	0	0	0	0	0	0	0	0	0	0	0	0	0	0	0	0	0	0	0	0	0	0	0	0	0	0
805	0	0	0	0	0	0	0	0	0	0	0	0	0	0	0	0	0	0	0	0	0	0	0	0	0	0	0	0	0	0	0	0	0
806	0	0	0	0	0	0	0	0	0	0	0	0	0	0	0	0	0	0	0	0	0	0	0	0	0	0	0	0	0	0	0	0	0
807	0	0	0	0	0	0	0	0	0	0	0	0	0	0	0	0	0	0	0	0	0	0	0	0	0	0	0	0	0	0	0	0	0
808	0	0	0	0	0	0	0	0	0	0	0	0	0	0	0	0	0	0	0	0	0	0	0	0	0	0	0	0	0	0	0	0	0
809	0	0	0	0	0	0	0	0	0	0	0	0	0	0	0	0	0	0	0	0	0	0	0	0	0	0	0	0	0	0	0	0	0
810	0	0	0	0	0	0	0	0	0	0	0	0	0	0	0	0	0	0	0	0	0	0	0	0	0	0	0	0	0	0	0	0	0
811	0	0	0	0	0	0	0	0	0	0	0	0	0	0	0	0	0	0	0	0	0	0	0	0	0	0	0	0	0	0	0	0	0
812	0	0	0	0	0	0	0	0	0	0	0	0	0	0	0	0	0	0	0	0	0	0	0	0	0	0	0	0	0	0	0	0	0
813	0	0	0	0	0	0	0	0	0	0	0	0	0	0	0	0	0	0	0	0	0	0	0	0	0	0	0	0	0	0	0	0	0
814	0	0	0	0	0	0	0	0	0	0	0	0	0	0	0	0	0	0	0	0	0	0	0	0	0	0	0	0	0	0	0	0	0
815	0	0	0	0	0	0	0	0	0	0	0	0	0	0	0	0	0	0	0	0	0	0	0	0	0	0	0	0	0	0	0	0	0
816	0	0	0	0	0	0	0	0	0	0	0	0	0	0	0	0	0	0	0	0	0	0	0	0	0	0	0	0	0	0	0	0	0
817	0	0	0	0	0	0	0	0	0	0	0	0	0	0	0	0	0	0	0	0	0	0	0	0	0	0	0	0	0	0	0	0	0
818	0	0	0	0	0	0	0	0	0	0	0	0	0	0	0	0	0	0	0	0	0	0	0	0	0	0	0	0	0	0	0	0	0
819	0	0	0	0	0	0	0	0	0	0	0	0	0	0	0	0	0	0	0	0	0	0	0	0	0	0	0	0	0	0	0	0	0
820	0	0	0	0	0	0	0	0	0	0	0	0	0	0	0	0	0	0	0	0	0	0	0	0	0	0	0	0	0	0	0	0	0
821	0	0	0	0	0	0	0	0	0	0	0	0	0	0	0	0	0	0	0	0	0	0	0	0	0	0	0	0	0	0	0	0	0
822	0	0	0	0	0	0	0	0	0	0	0	0	0	0	0	0	0	0	0	0	0	0	0	0	0	0	0	0	0	0	0	0	0
823	0	0	0	0	0	0	0	0	0	0	0	0	0	0	0	0	0	0	0	0	0	0	0	0	0	0	0	0	0	0	0	0	0
824	0	0	0	0	0	0	0	0	0	0	0	0	0	0	0	0	0	0	0	0	0	0	0	0	0	0	0	0	0	0	0	0	0
825	0	0	0	0	0	0	0	0	0	0	0	0	0	0	0	0	0	0	0	0	0	0	0	0	0	0	0	0	0	0	0	0	0
826	0	0	0	0	0	0	0	0	0	0	0	0	0	0	0	0	0	0	0	0	0	0	0	0	0	0	0	0	0	0	0	0	0
827	0	0	0	0	0	0	0	0	0	0	0	0	0	0	0	0	0	0	0	0	0	0	0	0	0	0	0	0	0	0	0	0	0
828	0	0	0	0	0	0	0	0	0	0	0	0	0	0	0	0	0	0	0	0	0	0	0	0	0	0	0	0	0	0	0	0	0
829	0	0	0	0	0	0	0	0	0	0	0	0	0	0	0	0	0	0	0	0	0	0	0	0	0	0	0	0	0	0	0	0	0
830	0	0	0	0	0	0	0	0	0	0	0	0	0	0	0	0	0	0	0	0	0	0	0	0	0	0	0	0	0	0	0	0	0
831	0	0	0	0	0	0	0	0	0	0	0	0	0	0	0	0	0	0	0	0	0	0	0	0	0	0	0	0	0	0	0	0	0
832	0	0	0	0	0	0	0	0	0	0	0	0	0	0	0	0	0	0	0	0	0	0	0	0	0	0	0	0	0	0	0	0	0
833	0	0	0	0	0	0	0	0	0	0	0	0	0	0	0	0	0	0	0	0	0	0	0	0	0	0	0	0	0	0	0	0	0
834	0	0	0	0	0	0	0	0	0	0	0	0	0	0	0	0	0	0	0	0	0	0	0	0	0	0	0	0	0	0	0	0	0
835	0	0	0	0	0	0	0	0	0	0	0	0	0	0	0	0	0	0	0	0	0	0	0	0	0	0	0	0	0	0	0	0	0
836	0	0	0	0	0	0	0	0	0	0	0	0	0	0	0	0	0	0	0	0	0	0	0	0	0	0	0	0	0	0	0	0	0
837	0	0	0	0	0	0	0	0	0	0	0	0	0	0	0	0	0	0	0	0	0	0	0	0	0	0	0	0	0	0	0	0	0
838	0	0	0	0	0	0	0	0	0	0	0	0	0	0	0	0	0	0	0	0	0	0	0	0	0	0	0	0	0	0	0	0	0
839	0	0	0	0	0	0	0	0	0	0	0	0	0	0	0	0	0	0	0	0	0	0	0	0	0	0	0	0	0	0	0	0	0
840	0	0	0	0	0	0	0	0	0	0	0	0	0	0	0	0	0	0	0	0	0	0	0	0	0	0	0	0	0	0	0	0	0
841	0	0	0	0	0	0	0	0	0	0	0	0	0	0	0	0	0	0	0	0	0	0	0	0	0	0	0	0	0	0	0	0	0
842	0	0	0	0	0	0	0	0	0	0	0	0	0	0	0	0	0	0	0	0	0	0	0	0	0	0	0	0	0	0	0	0	0
843	0	0	0	0	0	0	0	0	0	0	0	0	0	0	0	0	0	0	0	0	0	0	0	0	0	0	0	0	0	0	0	0	0
844	0	0	0	0	0	0	0	0	0	0	0	0	0	0	0	0	0	0	0	0	0	0	0	0	0	0	0	0	0	0	0	0	0
845	0	0	0	0	0	0	0	0	0	0	0	0	0	0	0	0	0	0	0	0	0	0	0	0	0	0	0	0	0	0	0	0	0
846	0	0	0	0	0	0	0	0	0	0	0	0	0	0	0	0	0	0	0	0	0	0	0	0	0	0	0	0	0	0	0	0	0
847	0	0	0	0	0	0	0	0	0	0	0	0	0	0	0	0	0	0	0	0	0	0	0	0	0	0	0	0	0	0	0	0	0
848	0	0	0	0	0	0	0	0	0	0	0	0	0	0	0	0	0	0	0	0	0	0	0	0	0	0	0	0	0	0	0	0	0
849	0	0	0	0	0	0	0	0	0	0	0	0	0	0	0	0	0	0	0	0	0	0	0	0	0	0	0	0	0	0	0	0	0
850	0	0	0	0	0	0	0	0	0	0	0	0	0	0	0	0	0	0	0	0	0	0	0	0	0	0	0	0	0	0	0	0	0
851	0	0	0	0	0	0	0	0	0	0	0	0	0	0	0	0	0	0	0	0	0	0	0	0	0	0	0	0	0	0	0	0	0
852	0	0	0	0	0	0	0	0	0	0	0	0	0	0	0	0	0	0	0	0	0	0	0	0	0	0	0	0	0	0	0	0	0
853	0	0	0	0	0	0	0	0	0	0	0	0	0	0	0	0	0	0	0	0	0	0	0	0	0	0	0	0	0	0	0	0	0
854	0	0	0	0	0	0	0	0	0	0	0	0	0	0	0	0	0	0	0	0	0	0	0	0	0	0	0	0	0	0	0	0	0
855	0	0	0	0	0	0	0	0	0	0	0	0	0	0	0	0	0	0	0	0	0	0	0	0	0	0	0	0	0	0	0	0	0
856	0	0	0	0	0	0	0	0	0	0	0	0	0	0	0	0	0	0	0	0	0	0	0	0	0	0	0	0	0	0	0	0	0
857	0	0	0	0	0	0	0	0	0	0	0	0	0	0	0	0	0	0	0	0	0	0	0	0	0	0	0	0	0	0	0	0	0
858	0	0	0	0	0	0	0	0	0	0	0	0	0	0	0	0	0	0	0	0	0	0	0	0	0	0	0	0	0	0	0	0	0
859	0	0	0	0	0	0	0	0	0	0	0	0	0	0	0	0	0	0	0	0	0	0	0	0	0	0	0	0	0	0	0	0	0
860	0	0	0	0	0	0	0	0	0	0	0	0	0	0	0	0	0	0	0	0	0	0	0	0	0	0	0	0	0	0	0	0	0
861	0	0	0	0	0	0	0	0	0	0	0	0	0	0	0	0	0	0	0	0	0	0	0	0	0	0	0	0	0	0	0	0	0
862	0	0	0	0	0	0	0	0	0	0	0	0	0	0	0	0	0	0	0	0	0	0	0	0	0	0	0	0	0	0	0	0	0
863	0	0	0	0	0	0	0	0	0	0	0	0	0	0	0	0	0	0	0	0	0	0	0	0	0	0	0	0	0	0	0	0	0
864	0	0	0	0	0	0	0	0	0	0	0	0	0	0	0	0	0	0	0	0	0	0	0	0	0	0	0	0	0	0	0	0	0
865	0	0	0	0	0	0	0	0	0	0	0	0	0	0	0	0	0	0	0	0	0	0	0	0	0	0	0	0	0	0	0	0	0
866	0	0	0	0	0	0	0	0	0	0	0	0	0	0	0	0	0	0	0	0	0	0	0	0	0	0	0	0	0	0	0	0	0
867	0	0	0	0	0	0	0	0	0	0	0	0	0	0	0	0	0	0	0	0	0	0	0	0	0	0	0	0	0	0	0	0	0
868	0	0	0	0	0	0	0	0	0	0	0	0	0	0	0	0	0	0	0	0	0	0	0	0	0	0	0	0	0	0	0	0	0
869	0	0	0	0	0	0	0	0	0	0	0	0	0	0	0	0	0	0	0	0	0	0	0	0	0	0	0	0	0	0	0	0	0
870	0	0	0	0	0	0	0	0	0	0	0	0	0	0	0	0	0	0	0	0	0	0	0	0	0	0	0	0	0	0	0	0	0
871	0	0	0	0	0	0	0	0	0	0	0	0	0	0	0	0	0	0	0	0	0	0	0	0	0	0	0	0	0	0	0	0	0
872	0	0	0	0	0	0	0	0	0	0	0	0	0	0	0	0	0	0	0	0	0	0	0	0	0	0	0	0	0	0	0	0	0
873	0	0	0	0	0	0	0	0	0	0	0	0	0	0	0	0	0	0	0	0	0	0	0	0	0	0	0	0	0	0	0	0	0
874	0	0	0	0	0	0	0	0	0	0	0	0	0	0	0	0	0	0	0	0	0	0	0	0	0	0	0	0	0	0	0	0	0
875	0	0	0	0	0	0	0	0	0	0	0	0	0	0	0	0	0	0	0	0	0	0	0	0	0	0	0	0	0	0	0	0	0
876	0	0	0	0	0	0	0	0	0	0	0	0	0	0	0	0	0	0	0	0	0	0	0	0	0	0	0	0	0	0	0	0	0
877	0	0	0	0	0	0	0	0	0	0	0	0	0	0	0	0	0	0	0	0	0	0	0	0	0	0	0	0	0	0	0	0	0
878	0	0	0	0	0	0	0	0	0	0	0	0	0	0	0	0	0	0	0	0	0	0	0	0	0	0	0	0	0	0	0	0	0
879	0	0	0	0	0	0	0	0	0	0	0	0	0	0	0	0	0	0	0	0	0	0	0	0	0	0	0	0	0	0	0	0	0
880	0	0	0	0	0	0	0	0	0	0	0	0	0	0	0	0	0	0	0	0	0	0	0	0	0	0	0	0	0	0	0	0	0
881	0	0	0	0	0	0	0	0	0	0	0	0	0	0	0	0	0	0	0	0	0	0	0	0	0	0	0	0	0	0	0	0	0
882	0	0	0	0	0	0	0	0	0	0	0	0	0	0	0	0	0	0	0	0	0	0	0	0	0	0	0	0	0	0	0	0	0
883	0	0	0	0	0	0	0	0	0	0	0	0	0	0	0	0	0	0	0	0	0	0	0	0	0	0	0	0	0	0	0	0	0
884	0	0	0	0	0	0	0	0	0	0	0	0	0	0	0	0	0	0	0	0	0	0	0	0	0	0	0	0	0	0	0	0	0
885	0	0	0	0	0	0	0	0	0	0	0	0	0	0	0	0	0	0	0	0	0	0	0	0	0	0	0	0	0	0	0	0	0
886	0	0	0	0	0	0	0	0	0	0	0	0	0	0	0	0	0	0	0	0	0	0	0	0	0	0	0	0	0	0	0	0	0
887	0	0	0	0	0	0	0	0	0	0	0	0	0	0	0	0	0	0	0	0	0	0	0	0	0	0	0	0	0	0	0	0	0
888	0	0	0	0	0	0	0	0	0	0	0	0	0	0	0	0	0	0	0	0	0	0	0	0	0	0	0	0	0	0	0	0	0
889	0	0	0	0	0	0	0	0	0	0	0	0	0	0	0	0	0	0	0	0	0	0	0	0	0	0	0	0	0	0	0	0	0
890	0	0	0	0	0	0	0	0	0	0	0	0	0	0	0	0	0	0	0	0	0	0	0	0	0	0	0	0	0	0	0	0	0
891	0	0	0	0	0	0	0	0	0	0	0	0	0	0	0	0	0	0	0	0	0	0	0	0	0	0	0	0	0	0	0	0	0
892	0	0	0	0	0	0	0	0	0	0	0	0	0	0	0	0	0	0	0	0	0	0	0	0	0	0	0	0	0	0	0	0	0
893	0	0	0	0	0	0	0	0	0	0	0	0	0	0	0	0	0	0	0	0	0	0	0	0	0	0	0	0	0	0	0	0	0
894	0	0	0	0	0	0	0	0	0	0	0	0	0	0	0	0	0	0	0	0	0	0	0	0	0	0	0	0	0	0	0	0	0
895	0	0	0	0	0	0	0	0	0	0	0	0	0	0	0	0	0	0	0	0	0	0	0	0	0	0	0	0	0	0	0	0	0
896	0	0	0	0	0	0	0	0	0	0	0	0	0	0	0	0	0	0	0	0	0	0	0	0	0	0	0	0	0	0	0	0	0
897	0	0	0	0	0	0	0	0	0	0	0	0	0	0	0	0	0	0	0	0	0	0	0	0	0	0	0	0	0	0	0	0	0
898	0	0	0	0	0	0	0	0	0	0	0	0	0	0	0	0	0	0	0	0	0	0	0	0	0	0	0	0	0	0	0	0	0
899	0	0	0	0	0	0	0	0	0	0	0	0	0	0	0	0	0	0	0	0	0	0	0	0	0	0	0	0	0	0	0	0	0
900	0	0	0	0	0	0	0	0	0	0	0	0	0	0	0	0	0	0	0	0	0	0	0	0	0	0	0	0	0	0	0	0	0
901	0	0	0	0	0	0	0	0	0	0	0	0	0	0	0	0	0	0	0	0	0	0	0	0	0	0	0	0	0	0	0	0	0
902	0	0	0	0	0	0	0	0	0	0	0	0	0	0	0	0	0	0	0	0	0	0	0	0	0	0	0	0	0	0	0	0	0
903	0	0	0	0	0	0	0	0	0	0	0	0	0	0	0	0	0	0	0	0	0	0	0	0	0	0	0	0	0	0	0	0	0
904	0	0	0	0	0	0	0	0	0	0	0	0	0	0	0	0	0	0	0	0	0	0	0	0	0	0	0	0	0	0	0	0	0
905	0	0	0	0	0	0	0	0	0	0	0	0	0	0	0	0	0	0	0	0	0	0	0	0	0	0	0	0	0	0	0	0	0
906	0	0	0	0	0	0	0	0	0	0	0	0	0	0	0	0	0	0	0	0	0	0	0	0	0	0	0	0	0	0	0	0	0
907	0	0	0	0	0	0	0	0	0	0	0	0	0	0	0	0	0	0	0	0	0	0	0	0	0	0	0	0	0	0	0	0	0
908	0	0	0	0	0	0	0	0	0	0	0	0	0	0	0	0	0	0	0	0	0	0	0	0	0	0	0	0	0	0	0	0	0
909	0	0	0	0	0	0	0	0	0	0	0	0	0	0	0	0	0	0	0	0	0	0	0	0	0	0	0	0	0	0	0	0	0
910	0	0	0	0	0	0	0	0	0	0	0	0	0	0	0	0	0	0	0	0	0	0	0	0	0	0	0	0	0	0	0	0	0
911	0	0	0	0	0	0	0	0	0	0	0	0	0	0	0	0	0	0	0	0	0	0	0	0	0	0	0	0	0	0	0	0	0
912	0	0	0	0	0	0	0	0	0	0	0	0	0	0	0	0	0	0	0	0	0	0	0	0	0	0	0	0	0	0	0	0	0
913	0	0	0	0	0	0	0	0	0	0	0	0	0	0	0	0	0	0	0	0	0	0	0	0	0	0	0	0	0	0	0	0	0
914	0	0	0	0	0	0	0	0	0	0	0	0	0	0	0	0	0	0	0	0	0	0	0	0	0	0	0	0	0	0	0	0	0
915	0	0	0	0	0	0	0	0	0	0	0	0	0	0	0	0	0	0	0	0	0	0	0	0	0	0	0	0	0	0	0	0	0
916	0	0	0	0	0	0	0	0	0	0	0	0	0	0	0	0	0	0	0	0	0	0	0	0	0	0	0	0	0	0	0	0	0
917	0	0	0	0	0	0	0	0	0	0	0	0	0	0	0	0	0	0	0	0	0	0	0	0	0	0	0	0	0	0	0	0	0
918	0	0	0	0	0	0	0	0	0	0	0	0	0	0	0	0	0	0	0	0	0	0	0	0	0	0	0	0	0	0	0	0	0
919	0	0	0	0	0	0	0	0	0	0	0	0	0	0	0	0	0	0	0	0	0	0	0	0	0	0	0	0	0	0	0	0	0
920	0	0	0	0	0	0	0	0	0	0	0	0	0	0	0	0	0	0	0	0	0	0	0	0	0	0	0	0	0	0	0	0	0
921	0	0	0	0	0	0	0	0	0	0	0	0	0	0	0	0	0	0	0	0	0	0	0	0	0	0	0	0	0	0	0	0	0
922	0	0	0	0	0	0	0	0	0	0	0	0	0	0	0	0	0	0	0	0	0	0	0	0	0	0	0	0	0	0	0	0	0
923	0	0	0	0	0	0	0	0	0	0	0	0	0	0	0	0	0	0	0	0	0	0	0	0	0	0	0	0	0	0	0	0	0
924	0	0	0	0	0	0	0	0	0	0	0	0	0	0	0	0	0	0	0	0	0	0	0	0	0	0	0	0	0	0	0	0	0
925	0	0	0	0	0	0	0	0	0	0	0	0	0	0	0	0	0	0	0	0	0	0	0	0	0	0	0	0	0	0	0	0	0
926	0	0	0	0	0	0	0	0	0	0	0	0	0	0	0	0	0	0	0	0	0	0	0	0	0	0	0	0	0	0	0	0	0
927	0	0	0	0	0	0	0	0	0	0	0	0	0	0	0	0	0	0	0	0	0	0	0	0	0	0	0	0	0	0	0	0	0
928	0	0	0	0	0	0	0	0	0	0	0	0	0	0	0	0	0	0	0	0	0	0	0	0	0	0	0	0	0	0	0	0	0
929	0	0	0	0	0	0	0	0	0	0	0	0	0	0	0	0	0	0	0	0	0	0	0	0	0	0	0	0	0	0	0	0	0
930	0	0	0	0	0	0	0	0	0	0	0	0	0	0	0	0	0	0	0	0	0	0	0	0	0	0	0	0	0	0	0	0	0
931	0	0	0	0	0	0	0	0	0	0	0	0	0	0	0	0	0	0	0	0	0	0	0	0	0	0	0	0	0	0	0	0	0
932	0	0	0	0	0	0	0	0	0	0	0	0	0	0	0	0	0	0	0	0	0	0	0	0	0	0	0	0	0	0	0	0	0
933	0	0	0	0	0	0	0	0	0	0	0	0	0	0	0	0	0	0	0	0	0	0	0	0	0	0	0	0	0	0	0	0	0
934	0	0	0	0	0	0	0	0	0	0	0	0	0	0	0	0	0	0	0	0	0	0	0	0	0	0	0	0	0	0	0	0	0
935	0	0	0	0	0	0	0	0	0	0	0	0	0	0	0	0	0	0	0	0	0	0	0	0	0	0	0	0	0	0	0	0	0
936	0	0	0	0	0	0	0	0	0	0	0	0	0	0	0	0	0	0	0	0	0	0	0	0	0	0	0	0	0	0	0	0	0
937	0	0	0	0	0	0	0	0	0	0	0	0	0	0	0	0	0	0	0	0	0	0	0	0	0	0	0	0	0	0	0	0	0
938	0	0	0	0	0	0	0	0	0	0	0	0	0	0	0	0	0	0	0	0	0	0	0	0	0	0	0	0	0	0	0	0	0
939	0	0	0	0	0	0	0	0	0	0	0	0	0	0	0	0	0	0	0	0	0	0	0	0	0	0	0	0	0	0	0	0	0
940	0	0	0	0	0	0	0	0	0	0	0	0	0	0	0	0	0	0	0	0	0	0	0	0	0	0	0	0	0	0	0	0	0
941	0	0	0	0	0	0	0	0	0	0	0	0	0	0	0	0	0	0	0	0	0	0	0	0	0	0	0	0	0	0	0	0	0
942	0	0	0	0	0	0	0	0	0	0	0	0	0	0	0	0	0	0	0	0	0	0	0	0	0	0	0	0	0	0	0	0	0
943	0	0	0	0	0	0	0	0	0	0	0	0	0	0	0	0	0	0	0	0	0	0	0	0	0	0	0	0	0	0	0	0	0
944	0	0	0	0	0	0	0	0	0	0	0	0	0	0	0	0	0	0	0	0	0	0	0	0	0	0	0	0	0	0	0	0	0
945	0	0	0	0	0	0	0	0	0	0	0	0	0	0	0	0	0	0	0	0	0	0	0	0	0	0	0	0	0	0	0	0	0
946	0	0	0	0	0	0	0	0	0	0	0	0	0	0	0	0	0	0	0	0	0	0	0	0	0	0	0	0	0	0	0	0	0
947	0	0	0	0	0	0	0	0	0	0	0	0	0	0	0	0	0	0	0	0	0	0	0	0	0	0	0	0	0	0	0	0	0
948	0	0	0	0	0	0	0	0	0	0	0	0	0	0	0	0	0	0	0	0	0	0	0	0	0	0	0	0	0	0	0	0	0
949	0	0	0	0	0	0	0	0	0	0	0	0	0	0	0	0	0	0	0	0	0	0	0	0	0	0	0	0	0	0	0	0	0
950	0	0	0	0	0	0	0	0	0	0	0	0	0	0	0	0	0	0	0	0	0	0	0	0	0	0	0	0	0	0	0	0	0
951	0	0	0	0	0	0	0	0	0	0	0	0	0	0	0	0	0	0	0	0	0	0	0	0	0	0	0	0	0	0	0	0	0
952	0	0	0	0	0	0	0	0	0	0	0	0	0	0	0	0	0	0	0	0	0	0	0	0	0	0	0	0	0	0	0	0	0
953	0	0	0	0	0	0	0	0	0	0	0	0	0	0	0	0	0	0	0	0	0	0	0	0	0	0	0	0	0	0	0	0	0
954	0	0	0	0	0	0	0	0	0	0	0	0	0	0	0	0	0	0	0	0	0	0	0	0	0	0	0	0	0	0	0	0	0
955	0	0	0	0	0	0	0	0	0	0	0	0	0	0	0	0	0	0	0	0	0	0	0	0	0	0	0	0	0	0	0	0	0
956	0	0	0	0	0	0	0	0	0	0	0	0	0	0	0	0	0	0	0	0	0	0	0	0	0	0	0	0	0	0	0	0	0
957	0	0	0	0	0	0	0	0	0	0	0	0	0	0	0	0	0	0	0	0	0	0	0	0	0	0	0	0	0	0	0	0	0
958	0	0	0	0	0	0	0	0	0	0	0	0	0	0	0	0	0	0	0	0	0	0	0	0	0	0	0	0	0	0	0	0	0
959	0	0	0	0	0	0	0	0	0	0	0	0	0	0	0	0	0	0	0	0	0	0	0	0	0	0	0	0	0	0	0	0	0
960	0	0	0	0	0	0	0	0	0	0	0	0	0	0	0	0	0	0	0	0	0	0	0	0	0	0	0	0	0	0	0	0	0
961	0	0	0	0	0	0	0	0	0	0	0	0	0	0	0	0	0	0	0	0	0	0	0	0	0	0	0	0	0	0	0	0	0
962	0	0	0	0	0	0	0	0	0	0	0	0	0	0	0	0	0	0	0	0	0	0	0	0	0	0	0	0	0	0	0	0	0
963	0	0	0	0	0	0	0	0	0	0	0	0	0	0	0	0	0	0	0	0	0	0	0	0	0	0	0	0	0	0	0	0	0
964	0	0	0	0	0	0	0	0	0	0	0	0	0	0	0	0	0	0	0	0	0	0	0	0	0	0	0	0	0	0	0	0	0
965	0	0	0	0	0	0	0	0	0	0	0	0	0	0	0	0	0	0	0	0	0	0	0	0	0	0	0	0	0	0	0	0	0
966	0	0	0	0	0	0	0	0	0	0	0	0	0	0	0	0	0	0	0	0	0	0	0	0	0	0	0	0	0	0	0	0	0
967	0	0	0	0	0	0	0	0	0	0	0	0	0	0	0	0	0	0	0	0	0	0	0	0	0	0	0	0	0	0	0	0	0
968	0	0	0	0	0	0	0	0	0	0	0	0	0	0	0	0	0	0	0	0	0	0	0	0	0	0	0	0	0	0	0	0	0
969	0	0	0	0	0	0	0	0	0	0	0	0	0	0	0	0	0	0	0	0	0	0	0	0	0	0	0	0	0	0	0	0	0
970	0	0	0	0	0	0	0	0	0	0	0	0	0	0	0	0	0	0	0	0	0	0	0	0	0	0	0	0	0	0	0	0	0
971	0	0	0	0	0	0	0	0	0	0	0	0	0	0	0	0	0	0	0	0	0	0	0	0	0	0	0	0	0	0	0	0	0
972	0	0	0	0	0	0	0	0	0	0	0	0	0	0	0	0	0	0	0	0	0	0	0	0	0	0	0	0	0	0	0	0	0
973	0	0	0	0	0	0	0	0	0	0	0	0	0	0	0	0	0	0	0	0	0	0	0	0	0	0	0	0	0	0	0	0	0
974	0	0	0	0	0	0	0	0	0	0	0	0	0	0	0	0	0	0	0	0	0	0	0	0	0	0	0	0	0	0	0	0	0
975	0	0	0	0	0	0	0	0	0	0	0	0	0	0	0	0	0	0	0	0	0	0	0	0	0	0	0	0	0	0	0	0	0
976	0	0	0	0	0	0	0	0	0	0	0	0	0	0	0	0	0	0	0	0	0	0	0	0	0	0	0	0	0	0	0	0	0
977	0	0	0	0	0	0	0	0	0	0	0	0	0	0	0	0	0	0	0	0	0	0	0	0	0	0	0	0	0	0	0	0	0
978	0	0	0	0	0	0	0	0	0	0	0	0	0	0	0	0	0	0	0	0	0	0	0	0	0	0	0	0	0	0	0	0	0
979	0	0	0	0	0	0	0	0	0	0	0	0	0	0	0	0	0	0	0	0	0	0	0	0	0	0	0	0	0	0	0	0	0
980	0	0	0	0	0	0	0	0	0	0	0	0	0	0	0	0	0	0	0	0	0	0	0	0	0	0	0	0	0	0	0	0	0
981	0	0	0	0	0	0	0	0	0	0	0	0	0	0	0	0	0	0	0	0	0	0	0	0	0	0	0	0	0	0	0	0	0
982	0	0	0	0	0	0	0	0	0	0	0	0	0	0	0	0	0	0	0	0	0	0	0	0	0	0	0	0	0	0	0	0	0
983	0	0	0	0	0	0	0	0	0	0	0	0	0	0	0	0	0	0	0	0	0	0	0	0	0	0	0	0	0	0	0	0	0
984	0	0	0	0	0	0	0	0	0	0	0	0	0	0	0	0	0	0	0	0	0	0	0	0	0	0	0	0	0	0	0	0	0
985	0	0	0	0	0	0	0	0	0	0	0	0	0	0	0	0	0	0	0	0	0	0	0	0	0	0	0	0	0	0	0	0	0
986	0	0	0	0	0	0	0	0	0	0	0	0	0	0	0	0	0	0	0	0	0	0	0	0	0	0	0	0	0	0	0	0	0
987	0	0	0	0	0	0	0	0	0	0	0	0	0	0	0	0	0	0	0	0	0	0	0	0	0	0	0	0	0	0	0	0	0
988	0	0	0	0	0	0	0	0	0	0	0	0	0	0	0	0	0	0	0	0	0	0	0	0	0	0	0	0	0	0	0	0	0
989	0	0	0	0	0	0	0	0	0	0	0	0	0	0	0	0	0	0	0	0	0	0	0	0	0	0	0	0	0	0	0	0	0
990	0	0	0	0	0	0	0	0	0	0	0	0	0	0	0	0	0	0	0	0	0	0	0	0	0	0	0	0	0	0	0	0	0
991	0	0	0	0	0	0	0	0	0	0	0	0	0	0	0	0	0	0	0	0	0	0	0	0	0	0	0	0	0	0	0	0	0
992	0	0	0	0	0	0	0	0	0	0	0	0	0	0	0	0	0	0	0	0	0	0	0	0	0	0	0	0	0	0	0	0	0
993	0	0	0	0	0	0	0	0	0	0	0	0	0	0	0	0	0	0	0	0	0	0	0	0	0	0	0	0	0	0	0	0	0
994	0	0	0	0	0	0	0	0	0	0	0	0	0	0	0	0	0	0	0	0	0	0	0	0	0	0	0	0	0	0	0	0	0
995	0	0	0	0	0	0	0	0	0	0	0	0	0	0	0	0	0	0	0	0	0	0	0	0	0	0	0	0	0	0	0	0	0
996	0	0	0	0	0	0	0	0	0	0	0	0	0	0	0	0	0	0	0	0	0	0	0	0	0	0	0	0	0	0	0	0	0
997	0	0	0	0	0	0	0	0	0	0	0	0	0	0	0	0	0	0	0	0	0	0	0	0	0	0	0	0	0	0	0	0	0
998	0	0	0	0	0	0	0	0	0	0	0	0	0	0	0	0	0	0	0	0	0	0	0	0	0	0	0	0	0	0	0	0	0
999	0	0	0	0	0	0	0	0	0	0	0	0	0	0	0	0	0	0	0	0	0	0	0	0	0	0	0	0	0	0	0	0	0
1000	0	0	0	0	0	0	0	0	0	0	0	0	0	0	0	0	0	0	0	0	0	0	0	0	0	0	0	0	0	0	0	0	0
1001	0	0	0	0	0	0	0	0	0	0	0	0	0	0	0	0	0	0	0	0	0	0	0	0	0	0	0	0	0	0	0	0	0
1002	0	0	0	0	0	0	0	0	0	0	0	0	0	0	0	0	0	0	0	0	0	0	0	0	0	0	0	0	0	0	0	0	0
1003	0	0	0	0	0	0	0	0	0	0	0	0	0	0	0	0	0	0	0	0	0	0	0	0	0	0	0	0	0	0	0	0	0
1004	0	0	0	0	0	0	0	0	0	0	0	0	0	0	0	0	0	0	0	0	0	0	0	0	0	0	0	0	0	0	0	0	0
1005	0	0	0	0	0	0	0	0	0	0	0	0	0	0	0	0	0	0	0	0	0	0	0	0	0	0	0	0	0	0	0	0	0
1006	0	0	0	0	0	0	0	0	0	0	0	0	0	0	0	0	0	0	0	0	0	0	0	0	0	0	0	0	0	0	0	0	0
1007	0	0	0	0	0	0	0	0	0	0	0	0	0	0	0	0	0	0	0	0	0	0	0	0	0	0	0	0	0	0	0	0	0
1008	0	0	0	0	0	0	0	0	0	0	0	0	0	0	0	0	0	0	0	0	0	0	0	0	0	0	0	0	0	0	0	0	0
1009	0	0	0	0	0	0	0	0	0	0	0	0	0	0	0	0	0	0	0	0	0	0	0	0	0	0	0	0	0	0	0	0	0
1010	0	0	0	0	0	0	0	0	0	0	0	0	0	0	0	0	0	0	0	0	0	0	0	0	0	0	0	0	0	0	0	0	0
1011	0	0	0	0	0	0	0	0	0	0	0	0	0	0	0	0	0	0	0	0	0	0	0	0	0	0	0	0	0	0	0	0	0
1012	0	0	0	0	0	0	0	0	0	0	0	0	0	0	0	0	0	0	0	0	0	0	0	0	0	0	0	0	0	0	0	0	0
1013	0	0	0	0	0	0	0	0	0	0	0	0	0	0	0	0	0	0	0	0	0	0	0	0	0	0	0	0	0	0	0	0	0
1014	0	0	0	0	0	0	0	0	0	0	0	0	0	0	0	0	0	0	0	0	0	0	0	0	0	0	0	0	0	0	0	0	0
1015	0	0	0	0	0	0	0	0	0	0	0	0	0	0	0	0	0	0	0	0	0	0	0	0	0	0	0	0	0	0	0	0	0
1016	0	0	0	0	0	0	0	0	0	0	0	0	0	0	0	0	0	0	0	0	0	0	0	0	0	0	0	0	0	0	0	0	0
1017	0	0	0	0	0	0	0	0	0	0	0	0	0	0	0	0	0	0	0	0	0	0	0	0	0	0	0	0	0	0	0	0	0
1018	0	0	0	0	0	0	0	0	0	0	0	0	0	0	0	0	0	0	0	0	0	0	0	0	0	0	0	0	0	0	0	0	0
1019	0	0	0	0	0	0	0	0	0	0	0	0	0	0	0	0	0	0	0	0	0	0	0	0	0	0	0	0	0	0	0	0	0
1020	0	0	0	0	0	0	0	0	0	0	0	0	0	0	0	0	0	0	0	0	0	0	0	0	0	0	0	0	0	0	0	0	0
1021	0	0	0	0	0	0	0	0	0	0	0	0	0	0	0	0	0	0	0	0	0	0	0	0	0	0	0	0	0	0	0	0	0
1022	0	0	0	0	0	0	0	0	0	0	0	0	0	0	0	0	0	0	0	0	0	0	0	0	0	0	0	0	0	0	0	0	0
1023	0	0	0	0	0	0	0	0	0	0	0	0	0	0	0	0	0	0	0	0	0	0	0	0	0	0	0	0	0	0	0	0	0
1024	0	0	0	0	0	0	0	0	0	0	0	0	0	0	0	0	0	0	0	0	0	0	0	0	0	0	0	0	0	0	0	0	0
1025	0	0	0	0	0	0	0	0	0	0	0	0	0	0	0	0	0	0	0	0	0	0	0	0	0	0	0	0	0	0	0	0	0
1026	0	0	0	0	0	0	0	0	0	0	0	0	0	0	0	0	0	0	0	0	0	0	0	0	0	0	0	0	0	0	0	0	0
1027	0	0	0	0	0	0	0	0	0	0	0	0	0	0	0	0	0	0	0	0	0	0	0	0	0	0	0	0	0	0	0	0	0
1028	0	0	0	0	0	0	0	0	0	0	0	0	0	0	0	0	0	0	0	0	0	0	0	0	0	0	0	0	0	0	0	0	0
1029	0	0	0	0	0	0	0	0	0	0	0	0	0	0	0	0	0	0	0	0	0	0	0	0	0	0	0	0	0	0	0	0	0
1030	0	0	0	0	0	0	0	0	0	0	0	0	0	0	0	0	0	0	0	0	0	0	0	0	0	0	0	0	0	0	0	0	0
1031	0	0	0	0	0	0	0	0	0	0	0	0	0	0	0	0	0	0	0	0	0	0	0	0	0	0	0	0	0	0	0	0	0
1032	0	0	0	0	0	0	0	0	0	0	0	0	0	0	0	0	0	0	0	0	0	0	0	0	0	0	0	0	0	0	0	0	0
1033	0	0	0	0	0	0	0	0	0	0	0	0	0	0	0	0	0	0	0	0	0	0	0	0	0	0	0	0	0	0	0	0	0
1034	0	0	0	0	0	0	0	0	0	0	0	0	0	0	0	0	0	0	0	0	0	0	0	0	0	0	0	0	0	0	0	0	0
1035	0	0	0	0	0	0	0	0	0	0	0	0	0	0	0	0	0	0	0	0	0	0	0	0	0	0	0	0	0	0	0	0	0
1036	0	0	0	0	0	0	0	0	0	0	0	0	0	0	0	0	0	0	0	0	0	0	0	0	0	0	0	0	0	0	0	0	0
1037	0	0	0	0	0	0	0	0	0	0	0	0	0	0	0	0	0	0	0	0	0	0	0	0	0	0	0	0	0	0	0	0	0
1038	0	0	0	0	0	0	0	0	0	0	0	0	0	0	0	0	0	0	0	0	0	0	0	0	0	0	0	0	0	0	0	0	0
1039	0	0	0	0	0	0	0	0	0	0	0	0	0	0	0	0	0	0	0	0	0	0	0	0	0	0	0	0	0	0	0	0	0
1040	0	0	0	0	0	0	0	0	0	0	0	0	0	0	0	0	0	0	0	0	0	0	0	0	0	0	0	0	0	0	0	0	0
1041	0	0	0	0	0	0	0	0	0	0	0	0	0	0	0	0	0	0	0	0	0	0	0	0	0	0	0	0	0	0	0	0	0
1042	0	0	0	0	0	0	0	0	0	0	0	0	0	0	0	0	0	0	0	0	0	0	0	0	0	0	0	0	0	0	0	0	0
1043	0	0	0	0	0	0	0	0	0	0	0	0	0	0	0	0	0	0	0	0	0	0	0	0	0	0	0	0	0	0	0	0	0
1044	0	0	0	0	0	0	0	0	0	0	0	0	0	0	0	0	0	0	0	0	0	0	0	0	0	0	0	0	0	0	0	0	0
1045	0	0	0	0	0	0	0	0	0	0	0	0	0	0	0	0	0	0	0	0	0	0	0	0	0	0	0	0	0	0	0	0	0
1046	0	0	0	0	0	0	0	0	0	0	0	0	0	0	0	0	0	0	0	0	0	0	0	0	0	0	0	0	0	0	0	0	0
1047	0	0	0	0	0	0	0	0	0	0	0	0	0	0	0	0	0	0	0	0	0	0	0	0	0	0	0	0	0	0	0	0	0
1048	0	0	0	0	0	0	0	0	0	0	0	0	0	0	0	0	0	0	0	0	0	0	0	0	0	0	0	0	0	0	0	0	0
1049	0	0	0	0	0	0	0	0	0	0	0	0	0	0	0	0	0	0	0	0	0	0	0	0	0	0	0	0	0	0	0	0	0
1050	0	0	0	0	0	0	0	0	0	0	0	0	0	0	0	0	0	0	0	0	0	0	0	0	0	0	0	0	0	0	0	0	0
1051	0	0	0	0	0	0	0	0	0	0	0	0	0	0	0	0	0	0	0	0	0	0	0	0	0	0	0	0	0	0	0	0	0
1052	0	0	0	0	0	0	0	0	0	0	0	0	0	0	0	0	0	0	0	0	0	0	0	0	0	0	0	0	0	0	0	0	0
1053	0	0	0	0	0	0	0	0	0	0	0	0	0	0	0	0	0	0	0	0	0	0	0	0	0	0	0	0	0	0	0	0	0
1054	0	0	0	0	0	0	0	0	0	0	0	0	0	0	0	0	0	0	0	0	0	0	0	0	0	0	0	0	0	0	0	0	0
1055	0	0	0	0	0	0	0	0	0	0	0	0	0	0	0	0	0	0	0	0	0	0	0	0	0	0	0	0	0	0	0	0	0
1056	0	0	0	0	0	0	0	0	0	0	0	0	0	0	0	0	0	0	0	0	0	0	0	0	0	0	0	0	0	0	0	0	0
1057	0	0	0	0	0	0	0	0	0	0	0	0	0	0	0	0	0	0	0	0	0	0	0	0	0	0	0	0	0	0	0	0	0
1058	0	0	0	0	0	0	0	0	0	0	0	0	0	0	0	0	0	0	0	0	0	0	0	0	0	0	0	0	0	0	0	0	0
1059	0	0	0	0	0	0	0	0	0	0	0	0	0	0	0	0	0	0	0	0	0	0	0	0	0	0	0	0	0	0	0	0	0
1060	0	0	0	0	0	0	0	0	0	0	0	0	0	0	0	0	0	0	0	0	0	0	0	0	0	0	0	0	0	0	0	0	0
1061	0	0	0	0	0	0	0	0	0	0	0	0	0	0	0	0	0	0	0	0	0	0	0	0	0	0	0	0	0	0	0	0	0
1062	0	0	0	0	0	0	0	0	0	0	0	0	0	0	0	0	0	0	0	0	0	0	0	0	0	0	0	0	0	0	0	0	0
1063	0	0	0	0	0	0	0	0	0	0	0	0	0	0	0	0	0	0	0	0	0	0	0	0	0	0	0	0	0	0	0	0	0
1064	0	0	0	0	0	0	0	0	0	0	0	0	0	0	0	0	0	0	0	0	0	0	0	0	0	0	0	0	0	0	0	0	0
1065	0	0	0	0	0	0	0	0	0	0	0	0	0	0	0	0	0	0	0	0	0	0	0	0	0	0	0	0	0	0	0	0	0
1066	0	0	0	0	0	0	0	0	0	0	0	0	0	0	0	0	0	0	0	0	0	0	0	0	0	0	0	0	0	0	0	0	0
1067	0	0	0	0	0	0	0	0	0	0	0	0	0	0	0	0	0	0	0	0	0	0	0	0	0	0	0	0	0	0	0	0	0
1068	0	0	0	0	0	0	0	0	0	0	0	0	0	0	0	0	0	0	0	0	0	0	0	0	0	0	0	0	0	0	0	0	0
1069	0	0	0	0	0	0	0	0	0	0	0	0	0	0	0	0	0	0	0	0	0	0	0	0	0	0	0	0	0	0	0	0	0
1070	0	0	0	0	0	0	0	0	0	0	0	0	0	0	0	0	0	0	0	0	0	0	0	0	0	0	0	0	0	0	0	0	0
1071	0	0	0	0	0	0	0	0	0	0	0	0	0	0	0	0	0	0	0	0	0	0	0	0	0	0	0	0	0	0	0	0	0
1072	0	0	0	0	0	0	0	0	0	0	0	0	0	0	0	0	0	0	0	0	0	0	0	0	0	0	0	0	0	0	0	0	0
1073	0	0	0	0	0	0	0	0	0	0	0	0	0	0	0	0	0	0	0	0	0	0	0	0	0	0	0	0	0	0	0	0	0
1074	0	0	0	0	0	0	0	0	0	0	0	0	0	0	0	0	0	0	0	0	0	0	0	0	0	0	0	0	0	0	0	0	0
1075	0	0	0	0	0	0	0	0	0	0	0	0	0	0	0	0	0	0	0	0	0	0	0	0	0	0	0	0	0	0	0	0	0
1076	0	0	0	0	0	0	0	0	0	0	0	0	0	0	0	0	0	0	0	0	0	0	0	0	0	0	0	0	0	0	0	0	0
1077	0	0	0	0	0	0	0	0	0	0	0	0	0	0	0	0	0	0	0	0	0	0	0	0	0	0	0	0	0	0	0	0	0
1078	0	0	0	0	0	0	0	0	0	0	0	0	0	0	0	0	0	0	0	0	0	0	0	0	0	0	0	0	0	0	0	0	0
1079	0	0	0	0	0	0	0	0	0	0	0	0	0	0	0	0	0	0	0	0	0	0	0	0	0	0	0	0	0	0	0	0	0
1080	0	0	0	0	0	0	0	0	0	0	0	0	0	0	0	0	0	0	0	0	0	0	0	0	0	0	0	0	0	0	0	0	0
1081	0	0	0	0	0	0	0	0	0	0	0	0	0	0	0	0	0	0	0	0	0	0	0	0	0	0	0	0	0	0	0	0	0
1082	0	0	0	0	0	0	0	0	0	0	0	0	0	0	0	0	0	0	0	0	0	0	0	0	0	0	0	0	0	0	0	0	0
1083	0	0	0	0	0	0	0	0	0	0	0	0	0	0	0	0	0	0	0	0	0	0	0	0	0	0	0	0	0	0	0	0	0
1084	0	0	0	0	0	0	0	0	0	0	0	0	0	0	0	0	0	0	0	0	0	0	0	0	0	0	0	0	0	0	0	0	0
1085	0	0	0	0	0	0	0	0	0	0	0	0	0	0	0	0	0	0	0	0	0	0	0	0	0	0	0	0	0	0	0	0	0
1086	0	0	0	0	0	0	0	0	0	0	0	0	0	0	0	0	0	0	0	0	0	0	0	0	0	0	0	0	0	0	0	0	0
1087	0	0	0	0	0	0	0	0	0	0	0	0	0	0	0	0	0	0	0	0	0	0	0	0	0	0	0	0	0	0	0	0	0
1088	0	0	0	0	0	0	0	0	0	0	0	0	0	0	0	0	0	0	0	0	0	0	0	0	0	0	0	0	0	0	0	0	0
1089	0	0	0	0	0	0	0	0	0	0	0	0	0	0	0	0	0	0	0	0	0	0	0	0	0	0	0	0	0	0	0	0	0
1090	0	0	0	0	0	0	0	0	0	0	0	0	0	0	0	0	0	0	0	0	0	0	0	0	0	0	0	0	0	0	0	0	0
1091	0	0	0	0	0	0	0	0	0	0	0	0	0	0	0	0	0	0	0	0	0	0	0	0	0	0	0	0	0	0	0	0	0
1092	0	0	0	0	0	0	0	0	0	0	0	0	0	0	0	0	0	0	0	0	0	0	0	0	0	0	0	0	0	0	0	0	0
1093	0	0	0	0	0	0	0	0	0	0	0	0	0	0	0	0	0	0	0	0	0	0	0	0	0	0	0	0	0	0	0	0	0
1094	0	0	0	0	0	0	0	0	0	0	0	0	0	0	0	0	0	0	0	0	0	0	0	0	0	0	0	0	0	0	0	0	0
1095	0	0	0	0	0	0	0	0	0	0	0	0	0	0	0	0	0	0	0	0	0	0	0	0	0	0	0	0	0	0	0	0	0
1096	0	0	0	0	0	0	0	0	0	0	0	0	0	0	0	0	0	0	0	0	0	0	0	0	0	0	0	0	0	0	0	0	0
1097	0	0	0	0	0	0	0	0	0	0	0	0	0	0	0	0	0	0	0	0	0	0	0	0	0	0	0	0	0	0	0	0	0
1098	0	0	0	0	0	0	0	0	0	0	0	0	0	0	0	0	0	0	0	0	0	0	0	0	0	0	0	0	0	0	0	0	0
1099	0	0	0	0	0	0	0	0	0	0	0	0	0	0	0	0	0	0	0	0	0	0	0	0	0	0	0	0	0	0	0	0	0
1100	0	0	0	0	0	0	0	0	0	0	0	0	0	0	0	0	0	0	0	0	0	0	0	0	0	0	0	0	0	0	0	0	0
1101	0	0	0	0	0	0	0	0	0	0	0	0	0	0	0	0	0	0	0	0	0	0	0	0	0	0	0	0	0	0	0	0	0
1102	0	0	0	0	0	0	0	0	0	0	0	0	0	0	0	0	0	0	0	0	0	0	0	0	0	0	0	0	0	0	0	0	0
1103	0	0	0	0	0	0	0	0	0	0	0	0	0	0	0	0	0	0	0	0	0	0	0	0	0	0	0	0	0	0	0	0	0
1104	0	0	0	0	0	0	0	0	0	0	0	0	0	0	0	0	0	0	0	0	0	0	0	0	0	0	0	0	0	0	0	0	0
1105	0	0	0	0	0	0	0	0	0	0	0	0	0	0	0	0	0	0	0	0	0	0	0	0	0	0	0	0	0	0	0	0	0
1106	0	0	0	0	0	0	0	0	0	0	0	0	0	0	0	0	0	0	0	0	0	0	0	0	0	0	0	0	0	0	0	0	0
1107	0	0	0	0	0	0	0	0	0	0	0	0	0	0	0	0	0	0	0	0	0	0	0	0	0	0	0	0	0	0	0	0	0
1108	0	0	0	0	0	0	0	0	0	0	0	0	0	0	0	0	0	0	0	0	0	0	0	0	0	0	0	0	0	0	0	0	0
1109	0	0	0	0	0	0	0	0	0	0	0	0	0	0	0	0	0	0	0	0	0	0	0	0	0	0	0	0	0	0	0	0	0
1110	0	0	0	0	0	0	0	0	0	0	0	0	0	0	0	0	0	0	0	0	0	0	0	0	0	0	0	0	0	0	0	0	0
1111	0	0	0	0	0	0	0	0	0	0	0	0	0	0	0	0	0	0	0	0	0	0	0	0	0	0	0	0	0	0	0	0	0
1112	0	0	0	0	0	0	0	0	0	0	0	0	0	0	0	0	0	0	0	0	0	0	0	0	0	0	0	0	0	0	0	0	0
1113	0	0	0	0	0	0	0	0	0	0	0	0	0	0	0	0	0	0	0	0	0	0	0	0	0	0	0	0	0	0	0	0	0
1114	0	0	0	0	0	0	0	0	0	0	0	0	0	0	0	0	0	0	0	0	0	0	0	0	0	0	0	0	0	0	0	0	0
1115	0	0	0	0	0	0	0	0	0	0	0	0	0	0	0	0	0	0	0	0	0	0	0	0	0	0	0	0	0	0	0	0	0
1116	0	0	0	0	0	0	0	0	0	0	0	0	0	0	0	0	0	0	0	0	0	0	0	0	0	0	0	0	0	0	0	0	0
1117	0	0	0	0	0	0	0	0	0	0	0	0	0	0	0	0	0	0	0	0	0	0	0	0	0	0	0	0	0	0	0	0	0
1118	0	0	0	0	0	0	0	0	0	0	0	0	0	0	0	0	0	0	0	0	0	0	0	0	0	0	0	0	0	0	0	0	0
1119	0	0	0	0	0	0	0	0	0	0	0	0	0	0	0	0	0	0	0	0	0	0	0	0	0	0	0	0	0	0	0	0	0
1120	0	0	0	0	0	0	0	0	0	0	0	0	0	0	0	0	0	0	0	0	0	0	0	0	0	0	0	0	0	0	0	0	0
1121	0	0	0	0	0	0	0	0	0	0	0	0	0	0	0	0	0	0	0	0	0	0	0	0	0	0	0	0	0	0	0	0	0
1122	0	0	0	0	0	0	0	0	0	0	0	0	0	0	0	0	0	0	0	0	0	0	0	0	0	0	0	0	0	0	0	0	0
1123	0	0	0	0	0	0	0	0	0	0	0	0	0	0	0	0	0	0	0	0	0	0	0	0	0	0	0	0	0	0	0	0	0
1124	0	0	0	0	0	0	0	0	0	0	0	0	0	0	0	0	0	0	0	0	0	0	0	0	0	0	0	0	0	0	0	0	0
1125	0	0	0	0	0	0	0	0	0	0	0	0	0	0	0	0	0	0	0	0	0	0	0	0	0	0	0	0	0	0	0	0	0
1126	0	0	0	0	0	0	0	0	0	0	0	0	0	0	0	0	0	0	0	0	0	0	0	0	0	0	0	0	0	0	0	0	0
1127	0	0	0	0	0	0	0	0	0	0	0	0	0	0	0	0	0	0	0	0	0	0	0	0	0	0	0	0	0	0	0	0	0
1128	0	0	0	0	0	0	0	0	0	0	0	0	0	0	0	0	0	0	0	0	0	0	0	0	0	0	0	0	0	0	0	0	0
1129	0	0	0	0	0	0	0	0	0	0	0	0	0	0	0	0	0	0	0	0	0	0	0	0	0	0	0	0	0	0	0	0	0
1130	0	0	0	0	0	0	0	0	0	0	0	0	0	0	0	0	0	0	0	0	0	0	0	0	0	0	0	0	0	0	0	0	0
1131	0	0	0	0	0	0	0	0	0	0	0	0	0	0	0	0	0	0	0	0	0	0	0	0	0	0	0	0	0	0	0	0	0
1132	0	0	0	0	0	0	0	0	0	0	0	0	0	0	0	0	0	0	0	0	0	0	0	0	0	0	0	0	0	0	0	0	0
1133	0	0	0	0	0	0	0	0	0	0	0	0	0	0	0	0	0	0	0	0	0	0	0	0	0	0	0	0	0	0	0	0	0
1134	0	0	0	0	0	0	0	0	0	0	0	0	0	0	0	0	0	0	0	0	0	0	0	0	0	0	0	0	0	0	0	0	0
1135	0	0	0	0	0	0	0	0	0	0	0	0	0	0	0	0	0	0	0	0	0	0	0	0	0	0	0	0	0	0	0	0	0
1136	0	0	0	0	0	0	0	0	0	0	0	0	0	0	0	0	0	0	0	0	0	0	0	0	0	0	0	0	0	0	0	0	0
1137	0	0	0	0	0	0	0	0	0	0	0	0	0	0	0	0	0	0	0	0	0	0	0	0	0	0	0	0	0	0	0	0	0
1138	0	0	0	0	0	0	0	0	0	0	0	0	0	0	0	0	0	0	0	0	0	0	0	0	0	0	0	0	0	0	0	0	0
1139	0	0	0	0	0	0	0	0	0	0	0	0	0	0	0	0	0	0	0	0	0	0	0	0	0	0	0	0	0	0	0	0	0
1140	0	0	0	0	0	0	0	0	0	0	0	0	0	0	0	0	0	0	0	0	0	0	0	0	0	0	0	0	0	0	0	0	0
1141	0	0	0	0	0	0	0	0	0	0	0	0	0	0	0	0	0	0	0	0	0	0	0	0	0	0	0	0	0	0	0	0	0
1142	0	0	0	0	0	0	0	0	0	0	0	0	0	0	0	0	0	0	0	0	0	0	0	0	0	0	0	0	0	0	0	0	0
1143	0	0	0	0	0	0	0	0	0	0	0	0	0	0	0	0	0	0	0	0	0	0	0	0	0	0	0	0	0	0	0	0	0
1144	0	0	0	0	0	0	0	0	0	0	0	0	0	0	0	0	0	0	0	0	0	0	0	0	0	0	0	0	0	0	0	0	0
1145	0	0	0	0	0	0	0	0	0	0	0	0	0	0	0	0	0	0	0	0	0	0	0	0	0	0	0	0	0	0	0	0	0
1146	0	0	0	0	0	0	0	0	0	0	0	0	0	0	0	0	0	0	0	0	0	0	0	0	0	0	0	0	0	0	0	0	0
1147	0	0	0	0	0	0	0	0	0	0	0	0	0	0	0	0	0	0	0	0	0	0	0	0	0	0	0	0	0	0	0	0	0
1148	0	0	0	0	0	0	0	0	0	0	0	0	0	0	0	0	0	0	0	0	0	0	0	0	0	0	0	0	0	0	0	0	0
1149	0	0	0	0	0	0	0	0	0	0	0	0	0	0	0	0	0	0	0	0	0	0	0	0	0	0	0	0	0	0	0	0	0
1150	0	0	0	0	0	0	0	0	0	0	0	0	0	0	0	0	0	0	0	0	0	0	0	0	0	0	0	0	0	0	0	0	0
1151	0	0	0	0	0	0	0	0	0	0	0	0	0	0	0	0	0	0	0	0	0	0	0	0	0	0	0	0	0	0	0	0	0
1152	0	0	0	0	0	0	0	0	0	0	0	0	0	0	0	0	0	0	0	0	0	0	0	0	0	0	0	0	0	0	0	0	0
1153	0	0	0	0	0	0	0	0	0	0	0	0	0	0	0	0	0	0	0	0	0	0	0	0	0	0	0	0	0	0	0	0	0
1154	0	0	0	0	0	0	0	0	0	0	0	0	0	0	0	0	0	0	0	0	0	0	0	0	0	0	0	0	0	0	0	0	0
1155	0	0	0	0	0	0	0	0	0	0	0	0	0	0	0	0	0	0	0	0	0	0	0	0	0	0	0	0	0	0	0	0	0
1156	0	0	0	0	0	0	0	0	0	0	0	0	0	0	0	0	0	0	0	0	0	0	0	0	0	0	0	0	0	0	0	0	0
1157	0	0	0	0	0	0	0	0	0	0	0	0	0	0	0	0	0	0	0	0	0	0	0	0	0	0	0	0	0	0	0	0	0
1158	0	0	0	0	0	0	0	0	0	0	0	0	0	0	0	0	0	0	0	0	0	0	0	0	0	0	0	0	0	0	0	0	0
1159	0	0	0	0	0	0	0	0	0	0	0	0	0	0	0	0	0	0	0	0	0	0	0	0	0	0	0	0	0	0	0	0	0
1160	0	0	0	0	0	0	0	0	0	0	0	0	0	0	0	0	0	0	0	0	0	0	0	0	0	0	0	0	0	0	0	0	0
1161	0	0	0	0	0	0	0	0	0	0	0	0	0	0	0	0	0	0	0	0	0	0	0	0	0	0	0	0	0	0	0	0	0
1162	0	0	0	0	0	0	0	0	0	0	0	0	0	0	0	0	0	0	0	0	0	0	0	0	0	0	0	0	0	0	0	0	0
1163	0	0	0	0	0	0	0	0	0	0	0	0	0	0	0	0	0	0	0	0	0	0	0	0	0	0	0	0	0	0	0	0	0
1164	0	0	0	0	0	0	0	0	0	0	0	0	0	0	0	0	0	0	0	0	0	0	0	0	0	0	0	0	0	0	0	0	0
1165	0	0	0	0	0	0	0	0	0	0	0	0	0	0	0	0	0	0	0	0	0	0	0	0	0	0	0	0	0	0	0	0	0
1166	0	0	0	0	0	0	0	0	0	0	0	0	0	0	0	0	0	0	0	0	0	0	0	0	0	0	0	0	0	0	0	0	0
1167	0	0	0	0	0	0	0	0	0	0	0	0	0	0	0	0	0	0	0	0	0	0	0	0	0	0	0	0	0	0	0	0	0
1168	0	0	0	0	0	0	0	0	0	0	0	0	0	0	0	0	0	0	0	0	0	0	0	0	0	0	0	0	0	0	0	0	0
1169	0	0	0	0	0	0	0	0	0	0	0	0	0	0	0	0	0	0	0	0	0	0	0	0	0	0	0	0	0	0	0	0	0
1170	0	0	0	0	0	0	0	0	0	0	0	0	0	0	0	0	0	0	0	0	0	0	0	0	0	0	0	0	0	0	0	0	0
1171	0	0	0	0	0	0	0	0	0	0	0	0	0	0	0	0	0	0	0	0	0	0	0	0	0	0	0	0	0	0	0	0	0
1172	0	0	0	0	0	0	0	0	0	0	0	0	0	0	0	0	0	0	0	0	0	0	0	0	0	0	0	0	0	0	0	0	0
1173	0	0	0	0	0	0	0	0	0	0	0	0	0	0	0	0	0	0	0	0	0	0	0	0	0	0	0	0	0	0	0	0	0
1174	0	0	0	0	0	0	0	0	0	0	0	0	0	0	0	0	0	0	0	0	0	0	0	0	0	0	0	0	0	0	0	0	0
1175	0	0	0	0	0	0	0	0	0	0	0	0	0	0	0	0	0	0	0	0	0	0	0	0	0	0	0	0	0	0	0	0	0
1176	0	0	0	0	0	0	0	0	0	0	0	0	0	0	0	0	0	0	0	0	0	0	0	0	0	0	0	0	0	0	0	0	0
1177	0	0	0	0	0	0	0	0	0	0	0	0	0	0	0	0	0	0	0	0	0	0	0	0	0	0	0	0	0	0	0	0	0
1178	0	0	0	0	0	0	0	0	0	0	0	0	0	0	0	0	0	0	0	0	0	0	0	0	0	0	0	0	0	0	0	0	0
1179	0	0	0	0	0	0	0	0	0	0	0	0	0	0	0	0	0	0	0	0	0	0	0	0	0	0	0	0	0	0	0	0	0
1180	0	0	0	0	0	0	0	0	0	0	0	0	0	0	0	0	0	0	0	0	0	0	0	0	0	0	0	0	0	0	0	0	0
1181	0	0	0	0	0	0	0	0	0	0	0	0	0	0	0	0	0	0	0	0	0	0	0	0	0	0	0	0	0	0	0	0	0
1182	0	0	0	0	0	0	0	0	0	0	0	0	0	0	0	0	0	0	0	0	0	0	0	0	0	0	0	0	0	0	0	0	0
1183	0	0	0	0	0	0	0	0	0	0	0	0	0	0	0	0	0	0	0	0	0	0	0	0	0	0	0	0	0	0	0	0	0
1184	0	0	0	0	0	0	0	0	0	0	0	0	0	0	0	0	0	0	0	0	0	0	0	0	0	0	0	0	0	0	0	0	0
1185	0	0	0	0	0	0	0	0	0	0	0	0	0	0	0	0	0	0	0	0	0	0	0	0	0	0	0	0	0	0	0	0	0
1186	0	0	0	0	0	0	0	0	0	0	0	0	0	0	0	0	0	0	0	0	0	0	0	0	0	0	0	0	0	0	0	0	0
1187	0	0	0	0	0	0	0	0	0	0	0	0	0	0	0	0	0	0	0	0	0	0	0	0	0	0	0	0	0	0	0	0	0
1188	0	0	0	0	0	0	0	0	0	0	0	0	0	0	0	0	0	0	0	0	0	0	0	0	0	0	0	0	0	0	0	0	0
1189	0	0	0	0	0	0	0	0	0	0	0	0	0	0	0	0	0	0	0	0	0	0	0	0	0	0	0	0	0	0	0	0	0
1190	0	0	0	0	0	0	0	0	0	0	0	0	0	0	0	0	0	0	0	0	0	0	0	0	0	0	0	0	0	0	0	0	0
1191	0	0	0	0	0	0	0	0	0	0	0	0	0	0	0	0	0	0	0	0	0	0	0	0	0	0	0	0	0	0	0	0	0
1192	0	0	0	0	0	0	0	0	0	0	0	0	0	0	0	0	0	0	0	0	0	0	0	0	0	0	0	0	0	0	0	0	0
1193	0	0	0	0	0	0	0	0	0	0	0	0	0	0	0	0	0	0	0	0	0	0	0	0	0	0	0	0	0	0	0	0	0
1194	0	0	0	0	0	0	0	0	0	0	0	0	0	0	0	0	0	0	0	0	0	0	0	0	0	0	0	0	0	0	0	0	0
1195	0	0	0	0	0	0	0	0	0	0	0	0	0	0	0	0	0	0	0	0	0	0	0	0	0	0	0	0	0	0	0	0	0
1196	0	0	0	0	0	0	0	0	0	0	0	0	0	0	0	0	0	0	0	0	0	0	0	0	0	0	0	0	0	0	0	0	0
1197	0	0	0	0	0	0	0	0	0	0	0	0	0	0	0	0	0	0	0	0	0	0	0	0	0	0	0	0	0	0	0	0	0
1198	0	0	0	0	0	0	0	0	0	0	0	0	0	0	0	0	0	0	0	0	0	0	0	0	0	0	0	0	0	0	0	0	0
1199	0	0	0	0	0	0	0	0	0	0	0	0	0	0	0	0	0	0	0	0	0	0	0	0	0	0	0	0	0	0	0	0	0
1200	0	0	0	0	0	0	0	0	0	0	0	0	0	0	0	0	0	0	0	0	0	0	0	0	0	0	0	0	0	0	0	0	0
1201	0	0	0	0	0	0	0	0	0	0	0	0	0	0	0	0	0	0	0	0	0	0	0	0	0	0	0	0	0	0	0	0	0
1202	0	0	0	0	0	0	0	0	0	0	0	0	0	0	0	0	0	0	0	0	0	0	0	0	0	0	0	0	0	0	0	0	0
1203	0	0	0	0	0	0	0	0	0	0	0	0	0	0	0	0	0	0	0	0	0	0	0	0	0	0	0	0	0	0	0	0	0
1204	0	0	0	0	0	0	0	0	0	0	0	0	0	0	0	0	0	0	0	0	0	0	0	0	0	0	0	0	0	0	0	0	0
1205	0	0	0	0	0	0	0	0	0	0	0	0	0	0	0	0	0	0	0	0	0	0	0	0	0	0	0	0	0	0	0	0	0
1206	0	0	0	0	0	0	0	0	0	0	0	0	0	0	0	0	0	0	0	0	0	0	0	0	0	0	0	0	0	0	0	0	0
1207	0	0	0	0	0	0	0	0	0	0	0	0	0	0	0	0	0	0	0	0	0	0	0	0	0	0	0	0	0	0	0	0	0
1208	0	0	0	0	0	0	0	0	0	0	0	0	0	0	0	0	0	0	0	0	0	0	0	0	0	0	0	0	0	0	0	0	0
1209	0	0	0	0	0	0	0	0	0	0	0	0	0	0	0	0	0	0	0	0	0	0	0	0	0	0	0	0	0	0	0	0	0
1210	0	0	0	0	0	0	0	0	0	0	0	0	0	0	0	0	0	0	0	0	0	0	0	0	0	0	0	0	0	0	0	0	0
1211	0	0	0	0	0	0	0	0	0	0	0	0	0	0	0	0	0	0	0	0	0	0	0	0	0	0	0	0	0	0	0	0	0
1212	0	0	0	0	0	0	0	0	0	0	0	0	0	0	0	0	0	0	0	0	0	0	0	0	0	0	0	0	0	0	0	0	0
1213	0	0	0	0	0	0	0	0	0	0	0	0	0	0	0	0	0	0	0	0	0	0	0	0	0	0	0	0	0	0	0	0	0
1214	0	0	0	0	0	0	0	0	0	0	0	0	0	0	0	0	0	0	0	0	0	0	0	0	0	0	0	0	0	0	0	0	0
1215	0	0	0	0	0	0	0	0	0	0	0	0	0	0	0	0	0	0	0	0	0	0	0	0	0	0	0	0	0	0	0	0	0
1216	0	0	0	0	0	0	0	0	0	0	0	0	0	0	0	0	0	0	0	0	0	0	0	0	0	0	0	0	0	0	0	0	0
1217	0	0	0	0	0	0	0	0	0	0	0	0	0	0	0	0	0	0	0	0	0	0	0	0	0	0	0	0	0	0	0	0	0
1218	0	0	0	0	0	0	0	0	0	0	0	0	0	0	0	0	0	0	0	0	0	0	0	0	0	0	0	0	0	0	0	0	0
1219	0	0	0	0	0	0	0	0	0	0	0	0	0	0	0	0	0	0	0	0	0	0	0	0	0	0	0	0	0	0	0	0	0
1220	0	0	0	0	0	0	0	0	0	0	0	0	0	0	0	0	0	0	0	0	0	0	0	0	0	0	0	0	0	0	0	0	0
1221	0	0	0	0	0	0	0	0	0	0	0	0	0	0	0	0	0	0	0	0	0	0	0	0	0	0	0	0	0	0	0	0	0
1222	0	0	0	0	0	0	0	0	0	0	0	0	0	0	0	0	0	0	0	0	0	0	0	0	0	0	0	0	0	0	0	0	0
1223	0	0	0	0	0	0	0	0	0	0	0	0	0	0	0	0	0	0	0	0	0	0	0	0	0	0	0	0	0	0	0	0	0
1224	0	0	0	0	0	0	0	0	0	0	0	0	0	0	0	0	0	0	0	0	0	0	0	0	0	0	0	0	0	0	0	0	0
1225	0	0	0	0	0	0	0	0	0	0	0	0	0	0	0	0	0	0	0	0	0	0	0	0	0	0	0	0	0	0	0	0	0
1226	0	0	0	0	0	0	0	0	0	0	0	0	0	0	0	0	0	0	0	0	0	0	0	0	0	0	0	0	0	0	0	0	0
1227	0	0	0	0	0	0	0	0	0	0	0	0	0	0	0	0	0	0	0	0	0	0	0	0	0	0	0	0	0	0	0	0	0
1228	0	0	0	0	0	0	0	0	0	0	0	0	0	0	0	0	0	0	0	0	0	0	0	0	0	0	0	0	0	0	0	0	0
1229	0	0	0	0	0	0	0	0	0	0	0	0	0	0	0	0	0	0	0	0	0	0	0	0	0	0	0	0	0	0	0	0	0
1230	0	0	0	0	0	0	0	0	0	0	0	0	0	0	0	0	0	0	0	0	0	0	0	0	0	0	0	0	0	0	0	0	0
1231	0	0	0	0	0	0	0	0	0	0	0	0	0	0	0	0	0	0	0	0	0	0	0	0	0	0	0	0	0	0	0	0	0
1232	0	0	0	0	0	0	0	0	0	0	0	0	0	0	0	0	0	0	0	0	0	0	0	0	0	0	0	0	0	0	0	0	0
1233	0	0	0	0	0	0	0	0	0	0	0	0	0	0	0	0	0	0	0	0	0	0	0	0	0	0	0	0	0	0	0	0	0
1234	0	0	0	0	0	0	0	0	0	0	0	0	0	0	0	0	0	0	0	0	0	0	0	0	0	0	0	0	0	0	0	0	0
1235	0	0	0	0	0	0	0	0	0	0	0	0	0	0	0	0	0	0	0	0	0	0	0	0	0	0	0	0	0	0	0	0	0
1236	0	0	0	0	0	0	0	0	0	0	0	0	0	0	0	0	0	0	0	0	0	0	0	0	0	0	0	0	0	0	0	0	0
1237	0	0	0	0	0	0	0	0	0	0	0	0	0	0	0	0	0	0	0	0	0	0	0	0	0	0	0	0	0	0	0	0	0
1238	0	0	0	0	0	0	0	0	0	0	0	0	0	0	0	0	0	0	0	0	0	0	0	0	0	0	0	0	0	0	0	0	0
1239	0	0	0	0	0	0	0	0	0	0	0	0	0	0	0	0	0	0	0	0	0	0	0	0	0	0	0	0	0	0	0	0	0
1240	0	0	0	0	0	0	0	0	0	0	0	0	0	0	0	0	0	0	0	0	0	0	0	0	0	0	0	0	0	0	0	0	0
1241	0	0	0	0	0	0	0	0	0	0	0	0	0	0	0	0	0	0	0	0	0	0	0	0	0	0	0	0	0	0	0	0	0
1242	0	0	0	0	0	0	0	0	0	0	0	0	0	0	0	0	0	0	0	0	0	0	0	0	0	0	0	0	0	0	0	0	0
1243	0	0	0	0	0	0	0	0	0	0	0	0	0	0	0	0	0	0	0	0	0	0	0	0	0	0	0	0	0	0	0	0	0
1244	0	0	0	0	0	0	0	0	0	0	0	0	0	0	0	0	0	0	0	0	0	0	0	0	0	0	0	0	0	0	0	0	0
1245	0	0	0	0	0	0	0	0	0	0	0	0	0	0	0	0	0	0	0	0	0	0	0	0	0	0	0	0	0	0	0	0	0
1246	0	0	0	0	0	0	0	0	0	0	0	0	0	0	0	0	0	0	0	0	0	0	0	0	0	0	0	0	0	0	0	0	0
1247	0	0	0	0	0	0	0	0	0	0	0	0	0	0	0	0	0	0	0	0	0	0	0	0	0	0	0	0	0	0	0	0	0
1248	0	0	0	0	0	0	0	0	0	0	0	0	0	0	0	0	0	0	0	0	0	0	0	0	0	0	0	0	0	0	0	0	0
1249	0	0	0	0	0	0	0	0	0	0	0	0	0	0	0	0	0	0	0	0	0	0	0	0	0	0	0	0	0	0	0	0	0
1250	0	0	0	0	0	0	0	0	0	0	0	0	0	0	0	0	0	0	0	0	0	0	0	0	0	0	0	0	0	0	0	0	0
1251	0	0	0	0	0	0	0	0	0	0	0	0	0	0	0	0	0	0	0	0	0	0	0	0	0	0	0	0	0	0	0	0	0
1252	0	0	0	0	0	0	0	0	0	0	0	0	0	0	0	0	0	0	0	0	0	0	0	0	0	0	0	0	0	0	0	0	0
1253	0	0	0	0	0	0	0	0	0	0	0	0	0	0	0	0	0	0	0	0	0	0	0	0	0	0	0	0	0	0	0	0	0
1254	0	0	0	0	0	0	0	0	0	0	0	0	0	0	0	0	0	0	0	0	0	0	0	0	0	0	0	0	0	0	0	0	0
1255	0	0	0	0	0	0	0	0	0	0	0	0	0	0	0	0	0	0	0	0	0	0	0	0	0	0	0	0	0	0	0	0	0
1256	0	0	0	0	0	0	0	0	0	0	0	0	0	0	0	0	0	0	0	0	0	0	0	0	0	0	0	0	0	0	0	0	0
1257	0	0	0	0	0	0	0	0	0	0	0	0	0	0	0	0	0	0	0	0	0	0	0	0	0	0	0	0	0	0	0	0	0
1258	0	0	0	0	0	0	0	0	0	0	0	0	0	0	0	0	0	0	0	0	0	0	0	0	0	0	0	0	0	0	0	0	0
1259	0	0	0	0	0	0	0	0	0	0	0	0	0	0	0	0	0	0	0	0	0	0	0	0	0	0	0	0	0	0	0	0	0
1260	0	0	0	0	0	0	0	0	0	0	0	0	0	0	0	0	0	0	0	0	0	0	0	0	0	0	0	0	0	0	0	0	0
1261	0	0	0	0	0	0	0	0	0	0	0	0	0	0	0	0	0	0	0	0	0	0	0	0	0	0	0	0	0	0	0	0	0
1262	0	0	0	0	0	0	0	0	0	0	0	0	0	0	0	0	0	0	0	0	0	0	0	0	0	0	0	0	0	0	0	0	0
1263	0	0	0	0	0	0	0	0	0	0	0	0	0	0	0	0	0	0	0	0	0	0	0	0	0	0	0	0	0	0	0	0	0
1264	0	0	0	0	0	0	0	0	0	0	0	0	0	0	0	0	0	0	0	0	0	0	0	0	0	0	0	0	0	0	0	0	0
1265	0	0	0	0	0	0	0	0	0	0	0	0	0	0	0	0	0	0	0	0	0	0	0	0	0	0	0	0	0	0	0	0	0
1266	0	0	0	0	0	0	0	0	0	0	0	0	0	0	0	0	0	0	0	0	0	0	0	0	0	0	0	0	0	0	0	0	0
1267	0	0	0	0	0	0	0	0	0	0	0	0	0	0	0	0	0	0	0	0	0	0	0	0	0	0	0	0	0	0	0	0	0
1268	0	0	0	0	0	0	0	0	0	0	0	0	0	0	0	0	0	0	0	0	0	0	0	0	0	0	0	0	0	0	0	0	0
1269	0	0	0	0	0	0	0	0	0	0	0	0	0	0	0	0	0	0	0	0	0	0	0	0	0	0	0	0	0	0	0	0	0
1270	0	0	0	0	0	0	0	0	0	0	0	0	0	0	0	0	0	0	0	0	0	0	0	0	0	0	0	0	0	0	0	0	0
1271	0	0	0	0	0	0	0	0	0	0	0	0	0	0	0	0	0	0	0	0	0	0	0	0	0	0	0	0	0	0	0	0	0
1272	0	0	0	0	0	0	0	0	0	0	0	0	0	0	0	0	0	0	0	0	0	0	0	0	0	0	0	0	0	0	0	0	0
1273	0	0	0	0	0	0	0	0	0	0	0	0	0	0	0	0	0	0	0	0	0	0	0	0	0	0	0	0	0	0	0	0	0
1274	0	0	0	0	0	0	0	0	0	0	0	0	0	0	0	0	0	0	0	0	0	0	0	0	0	0	0	0	0	0	0	0	0
1275	0	0	0	0	0	0	0	0	0	0	0	0	0	0	0	0	0	0	0	0	0	0	0	0	0	0	0	0	0	0	0	0	0
1276	0	0	0	0	0	0	0	0	0	0	0	0	0	0	0	0	0	0	0	0	0	0	0	0	0	0	0	0	0	0	0	0	0
1277	0	0	0	0	0	0	0	0	0	0	0	0	0	0	0	0	0	0	0	0	0	0	0	0	0	0	0	0	0	0	0	0	0
1278	0	0	0	0	0	0	0	0	0	0	0	0	0	0	0	0	0	0	0	0	0	0	0	0	0	0	0	0	0	0	0	0	0
1279	0	0	0	0	0	0	0	0	0	0	0	0	0	0	0	0	0	0	0	0	0	0	0	0	0	0	0	0	0	0	0	0	0
1280	0	0	0	0	0	0	0	0	0	0	0	0	0	0	0	0	0	0	0	0	0	0	0	0	0	0	0	0	0	0	0	0	0
1281	0	0	0	0	0	0	0	0	0	0	0	0	0	0	0	0	0	0	0	0	0	0	0	0	0	0	0	0	0	0	0	0	0
1282	0	0	0	0	0	0	0	0	0	0	0	0	0	0	0	0	0	0	0	0	0	0	0	0	0	0	0	0	0	0	0	0	0
1283	0	0	0	0	0	0	0	0	0	0	0	0	0	0	0	0	0	0	0	0	0	0	0	0	0	0	0	0	0	0	0	0	0
1284	0	0	0	0	0	0	0	0	0	0	0	0	0	0	0	0	0	0	0	0	0	0	0	0	0	0	0	0	0	0	0	0	0
1285	0	0	0	0	0	0	0	0	0	0	0	0	0	0	0	0	0	0	0	0	0	0	0	0	0	0	0	0	0	0	0	0	0
1286	0	0	0	0	0	0	0	0	0	0	0	0	0	0	0	0	0	0	0	0	0	0	0	0	0	0	0	0	0	0	0	0	0
1287	0	0	0	0	0	0	0	0	0	0	0	0	0	0	0	0	0	0	0	0	0	0	0	0	0	0	0	0	0	0	0	0	0
1288	0	0	0	0	0	0	0	0	0	0	0	0	0	0	0	0	0	0	0	0	0	0	0	0	0	0	0	0	0	0	0	0	0
1289	0	0	0	0	0	0	0	0	0	0	0	0	0	0	0	0	0	0	0	0	0	0	0	0	0	0	0	0	0	0	0	0	0
1290	0	0	0	0	0	0	0	0	0	0	0	0	0	0	0	0	0	0	0	0	0	0	0	0	0	0	0	0	0	0	0	0	0
1291	0	0	0	0	0	0	0	0	0	0	0	0	0	0	0	0	0	0	0	0	0	0	0	0	0	0	0	0	0	0	0	0	0
1292	0	0	0	0	0	0	0	0	0	0	0	0	0	0	0	0	0	0	0	0	0	0	0	0	0	0	0	0	0	0	0	0	0
1293	0	0	0	0	0	0	0	0	0	0	0	0	0	0	0	0	0	0	0	0	0	0	0	0	0	0	0	0	0	0	0	0	0
1294	0	0	0	0	0	0	0	0	0	0	0	0	0	0	0	0	0	0	0	0	0	0	0	0	0	0	0	0	0	0	0	0	0
1295	0	0	0	0	0	0	0	0	0	0	0	0	0	0	0	0	0	0	0	0	0	0	0	0	0	0	0	0	0	0	0	0	0
1296	0	0	0	0	0	0	0	0	0	0	0	0	0	0	0	0	0	0	0	0	0	0	0	0	0	0	0	0	0	0	0	0	0
1297	0	0	0	0	0	0	0	0	0	0	0	0	0	0	0	0	0	0	0	0	0	0	0	0	0	0	0	0	0	0	0	0	0
1298	0	0	0	0	0	0	0	0	0	0	0	0	0	0	0	0	0	0	0	0	0	0	0	0	0	0	0	0	0	0	0	0	0
1299	0	0	0	0	0	0	0	0	0	0	0	0	0	0	0	0	0	0	0	0	0	0	0	0	0	0	0	0	0	0	0	0	0
1300	0	0	0	0	0	0	0	0	0	0	0	0	0	0	0	0	0	0	0	0	0	0	0	0	0	0	0	0	0	0	0	0	0
1301	0	0	0	0	0	0	0	0	0	0	0	0	0	0	0	0	0	0	0	0	0	0	0	0	0	0	0	0	0	0	0	0	0
1302	0	0	0	0	0	0	0	0	0	0	0	0	0	0	0	0	0	0	0	0	0	0	0	0	0	0	0	0	0	0	0	0	0
1303	0	0	0	0	0	0	0	0	0	0	0	0	0	0	0	0	0	0	0	0	0	0	0	0	0	0	0	0	0	0	0	0	0
1304	0	0	0	0	0	0	0	0	0	0	0	0	0	0	0	0	0	0	0	0	0	0	0	0	0	0	0	0	0	0	0	0	0
1305	0	0	0	0	0	0	0	0	0	0	0	0	0	0	0	0	0	0	0	0	0	0	0	0	0	0	0	0	0	0	0	0	0
1306	0	0	0	0	0	0	0	0	0	0	0	0	0	0	0	0	0	0	0	0	0	0	0	0	0	0	0	0	0	0	0	0	0
1307	0	0	0	0	0	0	0	0	0	0	0	0	0	0	0	0	0	0	0	0	0	0	0	0	0	0	0	0	0	0	0	0	0
1308	0	0	0	0	0	0	0	0	0	0	0	0	0	0	0	0	0	0	0	0	0	0	0	0	0	0	0	0	0	0	0	0	0
1309	0	0	0	0	0	0	0	0	0	0	0	0	0	0	0	0	0	0	0	0	0	0	0	0	0	0	0	0	0	0	0	0	0
1310	0	0	0	0	0	0	0	0	0	0	0	0	0	0	0	0	0	0	0	0	0	0	0	0	0	0	0	0	0	0	0	0	0
1311	0	0	0	0	0	0	0	0	0	0	0	0	0	0	0	0	0	0	0	0	0	0	0	0	0	0	0	0	0	0	0	0	0
1312	0	0	0	0	0	0	0	0	0	0	0	0	0	0	0	0	0	0	0	0	0	0	0	0	0	0	0	0	0	0	0	0	0
1313	0	0	0	0	0	0	0	0	0	0	0	0	0	0	0	0	0	0	0	0	0	0	0	0	0	0	0	0	0	0	0	0	0
1314	0	0	0	0	0	0	0	0	0	0	0	0	0	0	0	0	0	0	0	0	0	0	0	0	0	0	0	0	0	0	0	0	0
1315	0	0	0	0	0	0	0	0	0	0	0	0	0	0	0	0	0	0	0	0	0	0	0	0	0	0	0	0	0	0	0	0	0
1316	0	0	0	0	0	0	0	0	0	0	0	0	0	0	0	0	0	0	0	0	0	0	0	0	0	0	0	0	0	0	0	0	0
1317	0	0	0	0	0	0	0	0	0	0	0	0	0	0	0	0	0	0	0	0	0	0	0	0	0	0	0	0	0	0	0	0	0
1318	0	0	0	0	0	0	0	0	0	0	0	0	0	0	0	0	0	0	0	0	0	0	0	0	0	0	0	0	0	0	0	0	0
1319	0	0	0	0	0	0	0	0	0	0	0	0	0	0	0	0	0	0	0	0	0	0	0	0	0	0	0	0	0	0	0	0	0
1320	0	0	0	0	0	0	0	0	0	0	0	0	0	0	0	0	0	0	0	0	0	0	0	0	0	0	0	0	0	0	0	0	0
1321	0	0	0	0	0	0	0	0	0	0	0	0	0	0	0	0	0	0	0	0	0	0	0	0	0	0	0	0	0	0	0	0	0
1322	0	0	0	0	0	0	0	0	0	0	0	0	0	0	0	0	0	0	0	0	0	0	0	0	0	0	0	0	0	0	0	0	0
1323	0	0	0	0	0	0	0	0	0	0	0	0	0	0	0	0	0	0	0	0	0	0	0	0	0	0	0	0	0	0	0	0	0
1324	0	0	0	0	0	0	0	0	0	0	0	0	0	0	0	0	0	0	0	0	0	0	0	0	0	0	0	0	0	0	0	0	0
1325	0	0	0	0	0	0	0	0	0	0	0	0	0	0	0	0	0	0	0	0	0	0	0	0	0	0	0	0	0	0	0	0	0
1326	0	0	0	0	0	0	0	0	0	0	0	0	0	0	0	0	0	0	0	0	0	0	0	0	0	0	0	0	0	0	0	0	0
1327	0	0	0	0	0	0	0	0	0	0	0	0	0	0	0	0	0	0	0	0	0	0	0	0	0	0	0	0	0	0	0	0	0
1328	0	0	0	0	0	0	0	0	0	0	0	0	0	0	0	0	0	0	0	0	0	0	0	0	0	0	0	0	0	0	0	0	0
1329	0	0	0	0	0	0	0	0	0	0	0	0	0	0	0	0	0	0	0	0	0	0	0	0	0	0	0	0	0	0	0	0	0
1330	0	0	0	0	0	0	0	0	0	0	0	0	0	0	0	0	0	0	0	0	0	0	0	0	0	0	0	0	0	0	0	0	0
1331	0	0	0	0	0	0	0	0	0	0	0	0	0	0	0	0	0	0	0	0	0	0	0	0	0	0	0	0	0	0	0	0	0
1332	0	0	0	0	0	0	0	0	0	0	0	0	0	0	0	0	0	0	0	0	0	0	0	0	0	0	0	0	0	0	0	0	0
1333	0	0	0	0	0	0	0	0	0	0	0	0	0	0	0	0	0	0	0	0	0	0	0	0	0	0	0	0	0	0	0	0	0
1334	0	0	0	0	0	0	0	0	0	0	0	0	0	0	0	0	0	0	0	0	0	0	0	0	0	0	0	0	0	0	0	0	0
1335	0	0	0	0	0	0	0	0	0	0	0	0	0	0	0	0	0	0	0	0	0	0	0	0	0	0	0	0	0	0	0	0	0
1336	0	0	0	0	0	0	0	0	0	0	0	0	0	0	0	0	0	0	0	0	0	0	0	0	0	0	0	0	0	0	0	0	0
1337	0	0	0	0	0	0	0	0	0	0	0	0	0	0	0	0	0	0	0	0	0	0	0	0	0	0	0	0	0	0	0	0	0
1338	0	0	0	0	0	0	0	0	0	0	0	0	0	0	0	0	0	0	0	0	0	0	0	0	0	0	0	0	0	0	0	0	0
1339	0	0	0	0	0	0	0	0	0	0	0	0	0	0	0	0	0	0	0	0	0	0	0	0	0	0	0	0	0	0	0	0	0
1340	0	0	0	0	0	0	0	0	0	0	0	0	0	0	0	0	0	0	0	0	0	0	0	0	0	0	0	0	0	0	0	0	0
1341	0	0	0	0	0	0	0	0	0	0	0	0	0	0	0	0	0	0	0	0	0	0	0	0	0	0	0	0	0	0	0	0	0
1342	0	0	0	0	0	0	0	0	0	0	0	0	0	0	0	0	0	0	0	0	0	0	0	0	0	0	0	0	0	0	0	0	0
1343	0	0	0	0	0	0	0	0	0	0	0	0	0	0	0	0	0	0	0	0	0	0	0	0	0	0	0	0	0	0	0	0	0
1344	0	0	0	0	0	0	0	0	0	0	0	0	0	0	0	0	0	0	0	0	0	0	0	0	0	0	0	0	0	0	0	0	0
1345	0	0	0	0	0	0	0	0	0	0	0	0	0	0	0	0	0	0	0	0	0	0	0	0	0	0	0	0	0	0	0	0	0
1346	0	0	0	0	0	0	0	0	0	0	0	0	0	0	0	0	0	0	0	0	0	0	0	0	0	0	0	0	0	0	0	0	0
1347	0	0	0	0	0	0	0	0	0	0	0	0	0	0	0	0	0	0	0	0	0	0	0	0	0	0	0	0	0	0	0	0	0
1348	0	0	0	0	0	0	0	0	0	0	0	0	0	0	0	0	0	0	0	0	0	0	0	0	0	0	0	0	0	0	0	0	0
1349	0	0	0	0	0	0	0	0	0	0	0	0	0	0	0	0	0	0	0	0	0	0	0	0	0	0	0	0	0	0	0	0	0
1350	0	0	0	0	0	0	0	0	0	0	0	0	0	0	0	0	0	0	0	0	0	0	0	0	0	0	0	0	0	0	0	0	0
1351	0	0	0	0	0	0	0	0	0	0	0	0	0	0	0	0	0	0	0	0	0	0	0	0	0	0	0	0	0	0	0	0	0
1352	0	0	0	0	0	0	0	0	0	0	0	0	0	0	0	0	0	0	0	0	0	0	0	0	0	0	0	0	0	0	0	0	0
1353	0	0	0	0	0	0	0	0	0	0	0	0	0	0	0	0	0	0	0	0	0	0	0	0	0	0	0	0	0	0	0	0	0
1354	0	0	0	0	0	0	0	0	0	0	0	0	0	0	0	0	0	0	0	0	0	0	0	0	0	0	0	0	0	0	0	0	0
1355	0	0	0	0	0	0	0	0	0	0	0	0	0	0	0	0	0	0	0	0	0	0	0	0	0	0	0	0	0	0	0	0	0
1356	0	0	0	0	0	0	0	0	0	0	0	0	0	0	0	0	0	0	0	0	0	0	0	0	0	0	0	0	0	0	0	0	0
1357	0	0	0	0	0	0	0	0	0	0	0	0	0	0	0	0	0	0	0	0	0	0	0	0	0	0	0	0	0	0	0	0	0
1358	0	0	0	0	0	0	0	0	0	0	0	0	0	0	0	0	0	0	0	0	0	0	0	0	0	0	0	0	0	0	0	0	0
1359	0	0	0	0	0	0	0	0	0	0	0	0	0	0	0	0	0	0	0	0	0	0	0	0	0	0	0	0	0	0	0	0	0
1360	0	0	0	0	0	0	0	0	0	0	0	0	0	0	0	0	0	0	0	0	0	0	0	0	0	0	0	0	0	0	0	0	0
1361	0	0	0	0	0	0	0	0	0	0	0	0	0	0	0	0	0	0	0	0	0	0	0	0	0	0	0	0	0	0	0	0	0
1362	0	0	0	0	0	0	0	0	0	0	0	0	0	0	0	0	0	0	0	0	0	0	0	0	0	0	0	0	0	0	0	0	0
1363	0	0	0	0	0	0	0	0	0	0	0	0	0	0	0	0	0	0	0	0	0	0	0	0	0	0	0	0	0	0	0	0	0
1364	0	0	0	0	0	0	0	0	0	0	0	0	0	0	0	0	0	0	0	0	0	0	0	0	0	0	0	0	0	0	0	0	0
1365	0	0	0	0	0	0	0	0	0	0	0	0	0	0	0	0	0	0	0	0	0	0	0	0	0	0	0	0	0	0	0	0	0
1366	0	0	0	0	0	0	0	0	0	0	0	0	0	0	0	0	0	0	0	0	0	0	0	0	0	0	0	0	0	0	0	0	0
1367	0	0	0	0	0	0	0	0	0	0	0	0	0	0	0	0	0	0	0	0	0	0	0	0	0	0	0	0	0	0	0	0	0
1368	0	0	0	0	0	0	0	0	0	0	0	0	0	0	0	0	0	0	0	0	0	0	0	0	0	0	0	0	0	0	0	0	0
1369	0	0	0	0	0	0	0	0	0	0	0	0	0	0	0	0	0	0	0	0	0	0	0	0	0	0	0	0	0	0	0	0	0
1370	0	0	0	0	0	0	0	0	0	0	0	0	0	0	0	0	0	0	0	0	0	0	0	0	0	0	0	0	0	0	0	0	0
1371	0	0	0	0	0	0	0	0	0	0	0	0	0	0	0	0	0	0	0	0	0	0	0	0	0	0	0	0	0	0	0	0	0
1372	0	0	0	0	0	0	0	0	0	0	0	0	0	0	0	0	0	0	0	0	0	0	0	0	0	0	0	0	0	0	0	0	0
1373	0	0	0	0	0	0	0	0	0	0	0	0	0	0	0	0	0	0	0	0	0	0	0	0	0	0	0	0	0	0	0	0	0
1374	0	0	0	0	0	0	0	0	0	0	0	0	0	0	0	0	0	0	0	0	0	0	0	0	0	0	0	0	0	0	0	0	0
1375	0	0	0	0	0	0	0	0	0	0	0	0	0	0	0	0	0	0	0	0	0	0	0	0	0	0	0	0	0	0	0	0	0
1376	0	0	0	0	0	0	0	0	0	0	0	0	0	0	0	0	0	0	0	0	0	0	0	0	0	0	0	0	0	0	0	0	0
1377	0	0	0	0	0	0	0	0	0	0	0	0	0	0	0	0	0	0	0	0	0	0	0	0	0	0	0	0	0	0	0	0	0
1378	0	0	0	0	0	0	0	0	0	0	0	0	0	0	0	0	0	0	0	0	0	0	0	0	0	0	0	0	0	0	0	0	0
1379	0	0	0	0	0	0	0	0	0	0	0	0	0	0	0	0	0	0	0	0	0	0	0	0	0	0	0	0	0	0	0	0	0
1380	0	0	0	0	0	0	0	0	0	0	0	0	0	0	0	0	0	0	0	0	0	0	0	0	0	0	0	0	0	0	0	0	0
1381	0	0	0	0	0	0	0	0	0	0	0	0	0	0	0	0	0	0	0	0	0	0	0	0	0	0	0	0	0	0	0	0	0
1382	0	0	0	0	0	0	0	0	0	0	0	0	0	0	0	0	0	0	0	0	0	0	0	0	0	0	0	0	0	0	0	0	0
1383	0	0	0	0	0	0	0	0	0	0	0	0	0	0	0	0	0	0	0	0	0	0	0	0	0	0	0	0	0	0	0	0	0
1384	0	0	0	0	0	0	0	0	0	0	0	0	0	0	0	0	0	0	0	0	0	0	0	0	0	0	0	0	0	0	0	0	0
1385	0	0	0	0	0	0	0	0	0	0	0	0	0	0	0	0	0	0	0	0	0	0	0	0	0	0	0	0	0	0	0	0	0
1386	0	0	0	0	0	0	0	0	0	0	0	0	0	0	0	0	0	0	0	0	0	0	0	0	0	0	0	0	0	0	0	0	0
1387	0	0	0	0	0	0	0	0	0	0	0	0	0	0	0	0	0	0	0	0	0	0	0	0	0	0	0	0	0	0	0	0	0
1388	0	0	0	0	0	0	0	0	0	0	0	0	0	0	0	0	0	0	0	0	0	0	0	0	0	0	0	0	0	0	0	0	0
1389	0	0	0	0	0	0	0	0	0	0	0	0	0	0	0	0	0	0	0	0	0	0	0	0	0	0	0	0	0	0	0	0	0
1390	0	0	0	0	0	0	0	0	0	0	0	0	0	0	0	0	0	0	0	0	0	0	0	0	0	0	0	0	0	0	0	0	0
1391	0	0	0	0	0	0	0	0	0	0	0	0	0	0	0	0	0	0	0	0	0	0	0	0	0	0	0	0	0	0	0	0	0
1392	0	0	0	0	0	0	0	0	0	0	0	0	0	0	0	0	0	0	0	0	0	0	0	0	0	0	0	0	0	0	0	0	0
1393	0	0	0	0	0	0	0	0	0	0	0	0	0	0	0	0	0	0	0	0	0	0	0	0	0	0	0	0	0	0	0	0	0
1394	0	0	0	0	0	0	0	0	0	0	0	0	0	0	0	0	0	0	0	0	0	0	0	0	0	0	0	0	0	0	0	0	0
1395	0	0	0	0	0	0	0	0	0	0	0	0	0	0	0	0	0	0	0	0	0	0	0	0	0	0	0	0	0	0	0	0	0
1396	0	0	0	0	0	0	0	0	0	0	0	0	0	0	0	0	0	0	0	0	0	0	0	0	0	0	0	0	0	0	0	0	0
1397	0	0	0	0	0	0	0	0	0	0	0	0	0	0	0	0	0	0	0	0	0	0	0	0	0	0	0	0	0	0	0	0	0
1398	0	0	0	0	0	0	0	0	0	0	0	0	0	0	0	0	0	0	0	0	0	0	0	0	0	0	0	0	0	0	0	0	0
1399	0	0	0	0	0	0	0	0	0	0	0	0	0	0	0	0	0	0	0	0	0	0	0	0	0	0	0	0	0	0	0	0	0
1400	0	0	0	0	0	0	0	0	0	0	0	0	0	0	0	0	0	0	0	0	0	0	0	0	0	0	0	0	0	0	0	0	0
1401	0	0	0	0	0	0	0	0	0	0	0	0	0	0	0	0	0	0	0	0	0	0	0	0	0	0	0	0	0	0	0	0	0
1402	0	0	0	0	0	0	0	0	0	0	0	0	0	0	0	0	0	0	0	0	0	0	0	0	0	0	0	0	0	0	0	0	0
1403	0	0	0	0	0	0	0	0	0	0	0	0	0	0	0	0	0	0	0	0	0	0	0	0	0	0	0	0	0	0	0	0	0
1404	0	0	0	0	0	0	0	0	0	0	0	0	0	0	0	0	0	0	0	0	0	0	0	0	0	0	0	0	0	0	0	0	0
1405	0	0	0	0	0	0	0	0	0	0	0	0	0	0	0	0	0	0	0	0	0	0	0	0	0	0	0	0	0	0	0	0	0
1406	0	0	0	0	0	0	0	0	0	0	0	0	0	0	0	0	0	0	0	0	0	0	0	0	0	0	0	0	0	0	0	0	0
1407	0	0	0	0	0	0	0	0	0	0	0	0	0	0	0	0	0	0	0	0	0	0	0	0	0	0	0	0	0	0	0	0	0
1408	0	0	0	0	0	0	0	0	0	0	0	0	0	0	0	0	0	0	0	0	0	0	0	0	0	0	0	0	0	0	0	0	0
1409	0	0	0	0	0	0	0	0	0	0	0	0	0	0	0	0	0	0	0	0	0	0	0	0	0	0	0	0	0	0	0	0	0
1410	0	0	0	0	0	0	0	0	0	0	0	0	0	0	0	0	0	0	0	0	0	0	0	0	0	0	0	0	0	0	0	0	0
1411	0	0	0	0	0	0	0	0	0	0	0	0	0	0	0	0	0	0	0	0	0	0	0	0	0	0	0	0	0	0	0	0	0
1412	0	0	0	0	0	0	0	0	0	0	0	0	0	0	0	0	0	0	0	0	0	0	0	0	0	0	0	0	0	0	0	0	0
1413	0	0	0	0	0	0	0	0	0	0	0	0	0	0	0	0	0	0	0	0	0	0	0	0	0	0	0	0	0	0	0	0	0
1414	0	0	0	0	0	0	0	0	0	0	0	0	0	0	0	0	0	0	0	0	0	0	0	0	0	0	0	0	0	0	0	0	0
1415	0	0	0	0	0	0	0	0	0	0	0	0	0	0	0	0	0	0	0	0	0	0	0	0	0	0	0	0	0	0	0	0	0
1416	0	0	0	0	0	0	0	0	0	0	0	0	0	0	0	0	0	0	0	0	0	0	0	0	0	0	0	0	0	0	0	0	0
1417	0	0	0	0	0	0	0	0	0	0	0	0	0	0	0	0	0	0	0	0	0	0	0	0	0	0	0	0	0	0	0	0	0
1418	0	0	0	0	0	0	0	0	0	0	0	0	0	0	0	0	0	0	0	0	0	0	0	0	0	0	0	0	0	0	0	0	0
1419	0	0	0	0	0	0	0	0	0	0	0	0	0	0	0	0	0	0	0	0	0	0	0	0	0	0	0	0	0	0	0	0	0
1420	0	0	0	0	0	0	0	0	0	0	0	0	0	0	0	0	0	0	0	0	0	0	0	0	0	0	0	0	0	0	0	0	0
1421	0	0	0	0	0	0	0	0	0	0	0	0	0	0	0	0	0	0	0	0	0	0	0	0	0	0	0	0	0	0	0	0	0
1422	0	0	0	0	0	0	0	0	0	0	0	0	0	0	0	0	0	0	0	0	0	0	0	0	0	0	0	0	0	0	0	0	0
1423	0	0	0	0	0	0	0	0	0	0	0	0	0	0	0	0	0	0	0	0	0	0	0	0	0	0	0	0	0	0	0	0	0
1424	0	0	0	0	0	0	0	0	0	0	0	0	0	0	0	0	0	0	0	0	0	0	0	0	0	0	0	0	0	0	0	0	0
1425	0	0	0	0	0	0	0	0	0	0	0	0	0	0	0	0	0	0	0	0	0	0	0	0	0	0	0	0	0	0	0	0	0
1426	0	0	0	0	0	0	0	0	0	0	0	0	0	0	0	0	0	0	0	0	0	0	0	0	0	0	0	0	0	0	0	0	0
1427	0	0	0	0	0	0	0	0	0	0	0	0	0	0	0	0	0	0	0	0	0	0	0	0	0	0	0	0	0	0	0	0	0
1428	0	0	0	0	0	0	0	0	0	0	0	0	0	0	0	0	0	0	0	0	0	0	0	0	0	0	0	0	0	0	0	0	0
1429	0	0	0	0	0	0	0	0	0	0	0	0	0	0	0	0	0	0	0	0	0	0	0	0	0	0	0	0	0	0	0	0	0
1430	0	0	0	0	0	0	0	0	0	0	0	0	0	0	0	0	0	0	0	0	0	0	0	0	0	0	0	0	0	0	0	0	0
1431	0	0	0	0	0	0	0	0	0	0	0	0	0	0	0	0	0	0	0	0	0	0	0	0	0	0	0	0	0	0	0	0	0
1432	0	0	0	0	0	0	0	0	0	0	0	0	0	0	0	0	0	0	0	0	0	0	0	0	0	0	0	0	0	0	0	0	0
1433	0	0	0	0	0	0	0	0	0	0	0	0	0	0	0	0	0	0	0	0	0	0	0	0	0	0	0	0	0	0	0	0	0
1434	0	0	0	0	0	0	0	0	0	0	0	0	0	0	0	0	0	0	0	0	0	0	0	0	0	0	0	0	0	0	0	0	0
1435	0	0	0	0	0	0	0	0	0	0	0	0	0	0	0	0	0	0	0	0	0	0	0	0	0	0	0	0	0	0	0	0	0
1436	0	0	0	0	0	0	0	0	0	0	0	0	0	0	0	0	0	0	0	0	0	0	0	0	0	0	0	0	0	0	0	0	0
1437	0	0	0	0	0	0	0	0	0	0	0	0	0	0	0	0	0	0	0	0	0	0	0	0	0	0	0	0	0	0	0	0	0
1438	0	0	0	0	0	0	0	0	0	0	0	0	0	0	0	0	0	0	0	0	0	0	0	0	0	0	0	0	0	0	0	0	0
1439	0	0	0	0	0	0	0	0	0	0	0	0	0	0	0	0	0	0	0	0	0	0	0	0	0	0	0	0	0	0	0	0	0
1440	0	0	0	0	0	0	0	0	0	0	0	0	0	0	0	0	0	0	0	0	0	0	0	0	0	0	0	0	0	0	0	0	0
1441	0	0	0	0	0	0	0	0	0	0	0	0	0	0	0	0	0	0	0	0	0	0	0	0	0	0	0	0	0	0	0	0	0
1442	0	0	0	0	0	0	0	0	0	0	0	0	0	0	0	0	0	0	0	0	0	0	0	0	0	0	0	0	0	0	0	0	0
1443	0	0	0	0	0	0	0	0	0	0	0	0	0	0	0	0	0	0	0	0	0	0	0	0	0	0	0	0	0	0	0	0	0
1444	0	0	0	0	0	0	0	0	0	0	0	0	0	0	0	0	0	0	0	0	0	0	0	0	0	0	0	0	0	0	0	0	0
1445	0	0	0	0	0	0	0	0	0	0	0	0	0	0	0	0	0	0	0	0	0	0	0	0	0	0	0	0	0	0	0	0	0
1446	0	0	0	0	0	0	0	0	0	0	0	0	0	0	0	0	0	0	0	0	0	0	0	0	0	0	0	0	0	0	0	0	0
1447	0	0	0	0	0	0	0	0	0	0	0	0	0	0	0	0	0	0	0	0	0	0	0	0	0	0	0	0	0	0	0	0	0
1448	0	0	0	0	0	0	0	0	0	0	0	0	0	0	0	0	0	0	0	0	0	0	0	0	0	0	0	0	0	0	0	0	0
1449	0	0	0	0	0	0	0	0	0	0	0	0	0	0	0	0	0	0	0	0	0	0	0	0	0	0	0	0	0	0	0	0	0
1450	0	0	0	0	0	0	0	0	0	0	0	0	0	0	0	0	0	0	0	0	0	0	0	0	0	0	0	0	0	0	0	0	0
1451	0	0	0	0	0	0	0	0	0	0	0	0	0	0	0	0	0	0	0	0	0	0	0	0	0	0	0	0	0	0	0	0	0
1452	0	0	0	0	0	0	0	0	0	0	0	0	0	0	0	0	0	0	0	0	0	0	0	0	0	0	0	0	0	0	0	0	0
1453	0	0	0	0	0	0	0	0	0	0	0	0	0	0	0	0	0	0	0	0	0	0	0	0	0	0	0	0	0	0	0	0	0
1454	0	0	0	0	0	0	0	0	0	0	0	0	0	0	0	0	0	0	0	0	0	0	0	0	0	0	0	0	0	0	0	0	0
1455	0	0	0	0	0	0	0	0	0	0	0	0	0	0	0	0	0	0	0	0	0	0	0	0	0	0	0	0	0	0	0	0	0
1456	0	0	0	0	0	0	0	0	0	0	0	0	0	0	0	0	0	0	0	0	0	0	0	0	0	0	0	0	0	0	0	0	0
1457	0	0	0	0	0	0	0	0	0	0	0	0	0	0	0	0	0	0	0	0	0	0	0	0	0	0	0	0	0	0	0	0	0
1458	0	0	0	0	0	0	0	0	0	0	0	0	0	0	0	0	0	0	0	0	0	0	0	0	0	0	0	0	0	0	0	0	0
1459	0	0	0	0	0	0	0	0	0	0	0	0	0	0	0	0	0	0	0	0	0	0	0	0	0	0	0	0	0	0	0	0	0
1460	0	0	0	0	0	0	0	0	0	0	0	0	0	0	0	0	0	0	0	0	0	0	0	0	0	0	0	0	0	0	0	0	0
1461	0	0	0	0	0	0	0	0	0	0	0	0	0	0	0	0	0	0	0	0	0	0	0	0	0	0	0	0	0	0	0	0	0
1462	0	0	0	0	0	0	0	0	0	0	0	0	0	0	0	0	0	0	0	0	0	0	0	0	0	0	0	0	0	0	0	0	0
1463	0	0	0	0	0	0	0	0	0	0	0	0	0	0	0	0	0	0	0	0	0	0	0	0	0	0	0	0	0	0	0	0	0
1464	0	0	0	0	0	0	0	0	0	0	0	0	0	0	0	0	0	0	0	0	0	0	0	0	0	0	0	0	0	0	0	0	0
1465	0	0	0	0	0	0	0	0	0	0	0	0	0	0	0	0	0	0	0	0	0	0	0	0	0	0	0	0	0	0	0	0	0
1466	0	0	0	0	0	0	0	0	0	0	0	0	0	0	0	0	0	0	0	0	0	0	0	0	0	0	0	0	0	0	0	0	0
1467	0	0	0	0	0	0	0	0	0	0	0	0	0	0	0	0	0	0	0	0	0	0	0	0	0	0	0	0	0	0	0	0	0
1468	0	0	0	0	0	0	0	0	0	0	0	0	0	0	0	0	0	0	0	0	0	0	0	0	0	0	0	0	0	0	0	0	0
1469	0	0	0	0	0	0	0	0	0	0	0	0	0	0	0	0	0	0	0	0	0	0	0	0	0	0	0	0	0	0	0	0	0
1470	0	0	0	0	0	0	0	0	0	0	0	0	0	0	0	0	0	0	0	0	0	0	0	0	0	0	0	0	0	0	0	0	0
1471	0	0	0	0	0	0	0	0	0	0	0	0	0	0	0	0	0	0	0	0	0	0	0	0	0	0	0	0	0	0	0	0	0
1472	0	0	0	0	0	0	0	0	0	0	0	0	0	0	0	0	0	0	0	0	0	0	0	0	0	0	0	0	0	0	0	0	0
1473	0	0	0	0	0	0	0	0	0	0	0	0	0	0	0	0	0	0	0	0	0	0	0	0	0	0	0	0	0	0	0	0	0
1474	0	0	0	0	0	0	0	0	0	0	0	0	0	0	0	0	0	0	0	0	0	0	0	0	0	0	0	0	0	0	0	0	0
1475	0	0	0	0	0	0	0	0	0	0	0	0	0	0	0	0	0	0	0	0	0	0	0	0	0	0	0	0	0	0	0	0	0
1476	0	0	0	0	0	0	0	0	0	0	0	0	0	0	0	0	0	0	0	0	0	0	0	0	0	0	0	0	0	0	0	0	0
1477	0	0	0	0	0	0	0	0	0	0	0	0	0	0	0	0	0	0	0	0	0	0	0	0	0	0	0	0	0	0	0	0	0
1478	0	0	0	0	0	0	0	0	0	0	0	0	0	0	0	0	0	0	0	0	0	0	0	0	0	0	0	0	0	0	0	0	0
1479	0	0	0	0	0	0	0	0	0	0	0	0	0	0	0	0	0	0	0	0	0	0	0	0	0	0	0	0	0	0	0	0	0
1480	0	0	0	0	0	0	0	0	0	0	0	0	0	0	0	0	0	0	0	0	0	0	0	0	0	0	0	0	0	0	0	0	0
1481	0	0	0	0	0	0	0	0	0	0	0	0	0	0	0	0	0	0	0	0	0	0	0	0	0	0	0	0	0	0	0	0	0
1482	0	0	0	0	0	0	0	0	0	0	0	0	0	0	0	0	0	0	0	0	0	0	0	0	0	0	0	0	0	0	0	0	0
1483	0	0	0	0	0	0	0	0	0	0	0	0	0	0	0	0	0	0	0	0	0	0	0	0	0	0	0	0	0	0	0	0	0
1484	0	0	0	0	0	0	0	0	0	0	0	0	0	0	0	0	0	0	0	0	0	0	0	0	0	0	0	0	0	0	0	0	0
1485	0	0	0	0	0	0	0	0	0	0	0	0	0	0	0	0	0	0	0	0	0	0	0	0	0	0	0	0	0	0	0	0	0
1486	0	0	0	0	0	0	0	0	0	0	0	0	0	0	0	0	0	0	0	0	0	0	0	0	0	0	0	0	0	0	0	0	0
1487	0	0	0	0	0	0	0	0	0	0	0	0	0	0	0	0	0	0	0	0	0	0	0	0	0	0	0	0	0	0	0	0	0
1488	0	0	0	0	0	0	0	0	0	0	0	0	0	0	0	0	0	0	0	0	0	0	0	0	0	0	0	0	0	0	0	0	0
1489	0	0	0	0	0	0	0	0	0	0	0	0	0	0	0	0	0	0	0	0	0	0	0	0	0	0	0	0	0	0	0	0	0
1490	0	0	0	0	0	0	0	0	0	0	0	0	0	0	0	0	0	0	0	0	0	0	0	0	0	0	0	0	0	0	0	0	0
1491	0	0	0	0	0	0	0	0	0	0	0	0	0	0	0	0	0	0	0	0	0	0	0	0	0	0	0	0	0	0	0	0	0
1492	0	0	0	0	0	0	0	0	0	0	0	0	0	0	0	0	0	0	0	0	0	0	0	0	0	0	0	0	0	0	0	0	0
1493	0	0	0	0	0	0	0	0	0	0	0	0	0	0	0	0	0	0	0	0	0	0	0	0	0	0	0	0	0	0	0	0	0
1494	0	0	0	0	0	0	0	0	0	0	0	0	0	0	0	0	0	0	0	0	0	0	0	0	0	0	0	0	0	0	0	0	0
1495	0	0	0	0	0	0	0	0	0	0	0	0	0	0	0	0	0	0	0	0	0	0	0	0	0	0	0	0	0	0	0	0	0
1496	0	0	0	0	0	0	0	0	0	0	0	0	0	0	0	0	0	0	0	0	0	0	0	0	0	0	0	0	0	0	0	0	0
1497	0	0	0	0	0	0	0	0	0	0	0	0	0	0	0	0	0	0	0	0	0	0	0	0	0	0	0	0	0	0	0	0	0
1498	0	0	0	0	0	0	0	0	0	0	0	0	0	0	0	0	0	0	0	0	0	0	0	0	0	0	0	0	0	0	0	0	0
1499	0	0	0	0	0	0	0	0	0	0	0	0	0	0	0	0	0	0	0	0	0	0	0	0	0	0	0	0	0	0	0	0	0
1500	0	0	0	0	0	0	0	0	0	0	0	0	0	0	0	0	0	0	0	0	0	0	0	0	0	0	0	0	0	0	0	0	0
1501	0	0	0	0	0	0	0	0	0	0	0	0	0	0	0	0	0	0	0	0	0	0	0	0	0	0	0	0	0	0	0	0	0
1502	0	0	0	0	0	0	0	0	0	0	0	0	0	0	0	0	0	0	0	0	0	0	0	0	0	0	0	0	0	0	0	0	0
1503	0	0	0	0	0	0	0	0	0	0	0	0	0	0	0	0	0	0	0	0	0	0	0	0	0	0	0	0	0	0	0	0	0
1504	0	0	0	0	0	0	0	0	0	0	0	0	0	0	0	0	0	0	0	0	0	0	0	0	0	0	0	0	0	0	0	0	0
1505	0	0	0	0	0	0	0	0	0	0	0	0	0	0	0	0	0	0	0	0	0	0	0	0	0	0	0	0	0	0	0	0	0
1506	0	0	0	0	0	0	0	0	0	0	0	0	0	0	0	0	0	0	0	0	0	0	0	0	0	0	0	0	0	0	0	0	0
1507	0	0	0	0	0	0	0	0	0	0	0	0	0	0	0	0	0	0	0	0	0	0	0	0	0	0	0	0	0	0	0	0	0
1508	0	0	0	0	0	0	0	0	0	0	0	0	0	0	0	0	0	0	0	0	0	0	0	0	0	0	0	0	0	0	0	0	0
1509	0	0	0	0	0	0	0	0	0	0	0	0	0	0	0	0	0	0	0	0	0	0	0	0	0	0	0	0	0	0	0	0	0
1510	0	0	0	0	0	0	0	0	0	0	0	0	0	0	0	0	0	0	0	0	0	0	0	0	0	0	0	0	0	0	0	0	0
1511	0	0	0	0	0	0	0	0	0	0	0	0	0	0	0	0	0	0	0	0	0	0	0	0	0	0	0	0	0	0	0	0	0
1512	0	0	0	0	0	0	0	0	0	0	0	0	0	0	0	0	0	0	0	0	0	0	0	0	0	0	0	0	0	0	0	0	0
1513	0	0	0	0	0	0	0	0	0	0	0	0	0	0	0	0	0	0	0	0	0	0	0	0	0	0	0	0	0	0	0	0	0
1514	0	0	0	0	0	0	0	0	0	0	0	0	0	0	0	0	0	0	0	0	0	0	0	0	0	0	0	0	0	0	0	0	0
1515	0	0	0	0	0	0	0	0	0	0	0	0	0	0	0	0	0	0	0	0	0	0	0	0	0	0	0	0	0	0	0	0	0
1516	0	0	0	0	0	0	0	0	0	0	0	0	0	0	0	0	0	0	0	0	0	0	0	0	0	0	0	0	0	0	0	0	0
1517	0	0	0	0	0	0	0	0	0	0	0	0	0	0	0	0	0	0	0	0	0	0	0	0	0	0	0	0	0	0	0	0	0
1518	0	0	0	0	0	0	0	0	0	0	0	0	0	0	0	0	0	0	0	0	0	0	0	0	0	0	0	0	0	0	0	0	0
1519	0	0	0	0	0	0	0	0	0	0	0	0	0	0	0	0	0	0	0	0	0	0	0	0	0	0	0	0	0	0	0	0	0
1520	0	0	0	0	0	0	0	0	0	0	0	0	0	0	0	0	0	0	0	0	0	0	0	0	0	0	0	0	0	0	0	0	0
1521	0	0	0	0	0	0	0	0	0	0	0	0	0	0	0	0	0	0	0	0	0	0	0	0	0	0	0	0	0	0	0	0	0
1522	0	0	0	0	0	0	0	0	0	0	0	0	0	0	0	0	0	0	0	0	0	0	0	0	0	0	0	0	0	0	0	0	0
1523	0	0	0	0	0	0	0	0	0	0	0	0	0	0	0	0	0	0	0	0	0	0	0	0	0	0	0	0	0	0	0	0	0
1524	0	0	0	0	0	0	0	0	0	0	0	0	0	0	0	0	0	0	0	0	0	0	0	0	0	0	0	0	0	0	0	0	0
1525	0	0	0	0	0	0	0	0	0	0	0	0	0	0	0	0	0	0	0	0	0	0	0	0	0	0	0	0	0	0	0	0	0
1526	0	0	0	0	0	0	0	0	0	0	0	0	0	0	0	0	0	0	0	0	0	0	0	0	0	0	0	0	0	0	0	0	0
1527	0	0	0	0	0	0	0	0	0	0	0	0	0	0	0	0	0	0	0	0	0	0	0	0	0	0	0	0	0	0	0	0	0
1528	0	0	0	0	0	0	0	0	0	0	0	0	0	0	0	0	0	0	0	0	0	0	0	0	0	0	0	0	0	0	0	0	0
1529	0	0	0	0	0	0	0	0	0	0	0	0	0	0	0	0	0	0	0	0	0	0	0	0	0	0	0	0	0	0	0	0	0
1530	0	0	0	0	0	0	0	0	0	0	0	0	0	0	0	0	0	0	0	0	0	0	0	0	0	0	0	0	0	0	0	0	0
1531	0	0	0	0	0	0	0	0	0	0	0	0	0	0	0	0	0	0	0	0	0	0	0	0	0	0	0	0	0	0	0	0	0
1532	0	0	0	0	0	0	0	0	0	0	0	0	0	0	0	0	0	0	0	0	0	0	0	0	0	0	0	0	0	0	0	0	0
1533	0	0	0	0	0	0	0	0	0	0	0	0	0	0	0	0	0	0	0	0	0	0	0	0	0	0	0	0	0	0	0	0	0
1534	0	0	0	0	0	0	0	0	0	0	0	0	0	0	0	0	0	0	0	0	0	0	0	0	0	0	0	0	0	0	0	0	0
1535	0	0	0	0	0	0	0	0	0	0	0	0	0	0	0	0	0	0	0	0	0	0	0	0	0	0	0	0	0	0	0	0	0
1536	0	0	0	0	0	0	0	0	0	0	0	0	0	0	0	0	0	0	0	0	0	0	0	0	0	0	0	0	0	0	0	0	0
1537	0	0	0	0	0	0	0	0	0	0	0	0	0	0	0	0	0	0	0	0	0	0	0	0	0	0	0	0	0	0	0	0	0
1538	0	0	0	0	0	0	0	0	0	0	0	0	0	0	0	0	0	0	0	0	0	0	0	0	0	0	0	0	0	0	0	0	0
1539	0	0	0	0	0	0	0	0	0	0	0	0	0	0	0	0	0	0	0	0	0	0	0	0	0	0	0	0	0	0	0	0	0
1540	0	0	0	0	0	0	0	0	0	0	0	0	0	0	0	0	0	0	0	0	0	0	0	0	0	0	0	0	0	0	0	0	0
1541	0	0	0	0	0	0	0	0	0	0	0	0	0	0	0	0	0	0	0	0	0	0	0	0	0	0	0	0	0	0	0	0	0
1542	0	0	0	0	0	0	0	0	0	0	0	0	0	0	0	0	0	0	0	0	0	0	0	0	0	0	0	0	0	0	0	0	0
1543	0	0	0	0	0	0	0	0	0	0	0	0	0	0	0	0	0	0	0	0	0	0	0	0	0	0	0	0	0	0	0	0	0
1544	0	0	0	0	0	0	0	0	0	0	0	0	0	0	0	0	0	0	0	0	0	0	0	0	0	0	0	0	0	0	0	0	0
1545	0	0	0	0	0	0	0	0	0	0	0	0	0	0	0	0	0	0	0	0	0	0	0	0	0	0	0	0	0	0	0	0	0
1546	0	0	0	0	0	0	0	0	0	0	0	0	0	0	0	0	0	0	0	0	0	0	0	0	0	0	0	0	0	0	0	0	0
1547	0	0	0	0	0	0	0	0	0	0	0	0	0	0	0	0	0	0	0	0	0	0	0	0	0	0	0	0	0	0	0	0	0
1548	0	0	0	0	0	0	0	0	0	0	0	0	0	0	0	0	0	0	0	0	0	0	0	0	0	0	0	0	0	0	0	0	0
1549	0	0	0	0	0	0	0	0	0	0	0	0	0	0	0	0	0	0	0	0	0	0	0	0	0	0	0	0	0	0	0	0	0
1550	0	0	0	0	0	0	0	0	0	0	0	0	0	0	0	0	0	0	0	0	0	0	0	0	0	0	0	0	0	0	0	0	0
1551	0	0	0	0	0	0	0	0	0	0	0	0	0	0	0	0	0	0	0	0	0	0	0	0	0	0	0	0	0	0	0	0	0
1552	0	0	0	0	0	0	0	0	0	0	0	0	0	0	0	0	0	0	0	0	0	0	0	0	0	0	0	0	0	0	0	0	0
1553	0	0	0	0	0	0	0	0	0	0	0	0	0	0	0	0	0	0	0	0	0	0	0	0	0	0	0	0	0	0	0	0	0
1554	0	0	0	0	0	0	0	0	0	0	0	0	0	0	0	0	0	0	0	0	0	0	0	0	0	0	0	0	0	0	0	0	0
1555	0	0	0	0	0	0	0	0	0	0	0	0	0	0	0	0	0	0	0	0	0	0	0	0	0	0	0	0	0	0	0	0	0
1556	0	0	0	0	0	0	0	0	0	0	0	0	0	0	0	0	0	0	0	0	0	0	0	0	0	0	0	0	0	0	0	0	0
1557	0	0	0	0	0	0	0	0	0	0	0	0	0	0	0	0	0	0	0	0	0	0	0	0	0	0	0	0	0	0	0	0	0
1558	0	0	0	0	0	0	0	0	0	0	0	0	0	0	0	0	0	0	0	0	0	0	0	0	0	0	0	0	0	0	0	0	0
1559	0	0	0	0	0	0	0	0	0	0	0	0	0	0	0	0	0	0	0	0	0	0	0	0	0	0	0	0	0	0	0	0	0
1560	0	0	0	0	0	0	0	0	0	0	0	0	0	0	0	0	0	0	0	0	0	0	0	0	0	0	0	0	0	0	0	0	0
1561	0	0	0	0	0	0	0	0	0	0	0	0	0	0	0	0	0	0	0	0	0	0	0	0	0	0	0	0	0	0	0	0	0
1562	0	0	0	0	0	0	0	0	0	0	0	0	0	0	0	0	0	0	0	0	0	0	0	0	0	0	0	0	0	0	0	0	0
1563	0	0	0	0	0	0	0	0	0	0	0	0	0	0	0	0	0	0	0	0	0	0	0	0	0	0	0	0	0	0	0	0	0
1564	0	0	0	0	0	0	0	0	0	0	0	0	0	0	0	0	0	0	0	0	0	0	0	0	0	0	0	0	0	0	0	0	0
1565	0	0	0	0	0	0	0	0	0	0	0	0	0	0	0	0	0	0	0	0	0	0	0	0	0	0	0	0	0	0	0	0	0
1566	0	0	0	0	0	0	0	0	0	0	0	0	0	0	0	0	0	0	0	0	0	0	0	0	0	0	0	0	0	0	0	0	0
1567	0	0	0	0	0	0	0	0	0	0	0	0	0	0	0	0	0	0	0	0	0	0	0	0	0	0	0	0	0	0	0	0	0
1568	0	0	0	0	0	0	0	0	0	0	0	0	0	0	0	0	0	0	0	0	0	0	0	0	0	0	0	0	0	0	0	0	0
1569	0	0	0	0	0	0	0	0	0	0	0	0	0	0	0	0	0	0	0	0	0	0	0	0	0	0	0	0	0	0	0	0	0
1570	0	0	0	0	0	0	0	0	0	0	0	0	0	0	0	0	0	0	0	0	0	0	0	0	0	0	0	0	0	0	0	0	0
1571	0	0	0	0	0	0	0	0	0	0	0	0	0	0	0	0	0	0	0	0	0	0	0	0	0	0	0	0	0	0	0	0	0
1572	0	0	0	0	0	0	0	0	0	0	0	0	0	0	0	0	0	0	0	0	0	0	0	0	0	0	0	0	0	0	0	0	0
1573	0	0	0	0	0	0	0	0	0	0	0	0	0	0	0	0	0	0	0	0	0	0	0	0	0	0	0	0	0	0	0	0	0
1574	0	0	0	0	0	0	0	0	0	0	0	0	0	0	0	0	0	0	0	0	0	0	0	0	0	0	0	0	0	0	0	0	0
1575	0	0	0	0	0	0	0	0	0	0	0	0	0	0	0	0	0	0	0	0	0	0	0	0	0	0	0	0	0	0	0	0	0
1576	0	0	0	0	0	0	0	0	0	0	0	0	0	0	0	0	0	0	0	0	0	0	0	0	0	0	0	0	0	0	0	0	0
1577	0	0	0	0	0	0	0	0	0	0	0	0	0	0	0	0	0	0	0	0	0	0	0	0	0	0	0	0	0	0	0	0	0
1578	0	0	0	0	0	0	0	0	0	0	0	0	0	0	0	0	0	0	0	0	0	0	0	0	0	0	0	0	0	0	0	0	0
1579	0	0	0	0	0	0	0	0	0	0	0	0	0	0	0	0	0	0	0	0	0	0	0	0	0	0	0	0	0	0	0	0	0
1580	0	0	0	0	0	0	0	0	0	0	0	0	0	0	0	0	0	0	0	0	0	0	0	0	0	0	0	0	0	0	0	0	0
1581	0	0	0	0	0	0	0	0	0	0	0	0	0	0	0	0	0	0	0	0	0	0	0	0	0	0	0	0	0	0	0	0	0
1582	0	0	0	0	0	0	0	0	0	0	0	0	0	0	0	0	0	0	0	0	0	0	0	0	0	0	0	0	0	0	0	0	0
1583	0	0	0	0	0	0	0	0	0	0	0	0	0	0	0	0	0	0	0	0	0	0	0	0	0	0	0	0	0	0	0	0	0
1584	0	0	0	0	0	0	0	0	0	0	0	0	0	0	0	0	0	0	0	0	0	0	0	0	0	0	0	0	0	0	0	0	0
1585	0	0	0	0	0	0	0	0	0	0	0	0	0	0	0	0	0	0	0	0	0	0	0	0	0	0	0	0	0	0	0	0	0
1586	0	0	0	0	0	0	0	0	0	0	0	0	0	0	0	0	0	0	0	0	0	0	0	0	0	0	0	0	0	0	0	0	0
1587	0	0	0	0	0	0	0	0	0	0	0	0	0	0	0	0	0	0	0	0	0	0	0	0	0	0	0	0	0	0	0	0	0
1588	0	0	0	0	0	0	0	0	0	0	0	0	0	0	0	0	0	0	0	0	0	0	0	0	0	0	0	0	0	0	0	0	0
1589	0	0	0	0	0	0	0	0	0	0	0	0	0	0	0	0	0	0	0	0	0	0	0	0	0	0	0	0	0	0	0	0	0
1590	0	0	0	0	0	0	0	0	0	0	0	0	0	0	0	0	0	0	0	0	0	0	0	0	0	0	0	0	0	0	0	0	0
1591	0	0	0	0	0	0	0	0	0	0	0	0	0	0	0	0	0	0	0	0	0	0	0	0	0	0	0	0	0	0	0	0	0
1592	0	0	0	0	0	0	0	0	0	0	0	0	0	0	0	0	0	0	0	0	0	0	0	0	0	0	0	0	0	0	0	0	0
1593	0	0	0	0	0	0	0	0	0	0	0	0	0	0	0	0	0	0	0	0	0	0	0	0	0	0	0	0	0	0	0	0	0
1594	0	0	0	0	0	0	0	0	0	0	0	0	0	0	0	0	0	0	0	0	0	0	0	0	0	0	0	0	0	0	0	0	0
1595	0	0	0	0	0	0	0	0	0	0	0	0	0	0	0	0	0	0	0	0	0	0	0	0	0	0	0	0	0	0	0	0	0
1596	0	0	0	0	0	0	0	0	0	0	0	0	0	0	0	0	0	0	0	0	0	0	0	0	0	0	0	0	0	0	0	0	0
1597	0	0	0	0	0	0	0	0	0	0	0	0	0	0	0	0	0	0	0	0	0	0	0	0	0	0	0	0	0	0	0	0	0
1598	0	0	0	0	0	0	0	0	0	0	0	0	0	0	0	0	0	0	0	0	0	0	0	0	0	0	0	0	0	0	0	0	0
1599	0	0	0	0	0	0	0	0	0	0	0	0	0	0	0	0	0	0	0	0	0	0	0	0	0	0	0	0	0	0	0	0	0
1600	0	0	0	0	0	0	0	0	0	0	0	0	0	0	0	0	0	0	0	0	0	0	0	0	0	0	0	0	0	0	0	0	0
1601	0	0	0	0	0	0	0	0	0	0	0	0	0	0	0	0	0	0	0	0	0	0	0	0	0	0	0	0	0	0	0	0	0
1602	0	0	0	0	0	0	0	0	0	0	0	0	0	0	0	0	0	0	0	0	0	0	0	0	0	0	0	0	0	0	0	0	0
1603	0	0	0	0	0	0	0	0	0	0	0	0	0	0	0	0	0	0	0	0	0	0	0	0	0	0	0	0	0	0	0	0	0
1604	0	0	0	0	0	0	0	0	0	0	0	0	0	0	0	0	0	0	0	0	0	0	0	0	0	0	0	0	0	0	0	0	0
1605	0	0	0	0	0	0	0	0	0	0	0	0	0	0	0	0	0	0	0	0	0	0	0	0	0	0	0	0	0	0	0	0	0
1606	0	0	0	0	0	0	0	0	0	0	0	0	0	0	0	0	0	0	0	0	0	0	0	0	0	0	0	0	0	0	0	0	0
1607	0	0	0	0	0	0	0	0	0	0	0	0	0	0	0	0	0	0	0	0	0	0	0	0	0	0	0	0	0	0	0	0	0
1608	0	0	0	0	0	0	0	0	0	0	0	0	0	0	0	0	0	0	0	0	0	0	0	0	0	0	0	0	0	0	0	0	0
1609	0	0	0	0	0	0	0	0	0	0	0	0	0	0	0	0	0	0	0	0	0	0	0	0	0	0	0	0	0	0	0	0	0
1610	0	0	0	0	0	0	0	0	0	0	0	0	0	0	0	0	0	0	0	0	0	0	0	0	0	0	0	0	0	0	0	0	0
1611	0	0	0	0	0	0	0	0	0	0	0	0	0	0	0	0	0	0	0	0	0	0	0	0	0	0	0	0	0	0	0	0	0
1612	0	0	0	0	0	0	0	0	0	0	0	0	0	0	0	0	0	0	0	0	0	0	0	0	0	0	0	0	0	0	0	0	0
1613	0	0	0	0	0	0	0	0	0	0	0	0	0	0	0	0	0	0	0	0	0	0	0	0	0	0	0	0	0	0	0	0	0
1614	0	0	0	0	0	0	0	0	0	0	0	0	0	0	0	0	0	0	0	0	0	0	0	0	0	0	0	0	0	0	0	0	0
1615	0	0	0	0	0	0	0	0	0	0	0	0	0	0	0	0	0	0	0	0	0	0	0	0	0	0	0	0	0	0	0	0	0
1616	0	0	0	0	0	0	0	0	0	0	0	0	0	0	0	0	0	0	0	0	0	0	0	0	0	0	0	0	0	0	0	0	0
1617	0	0	0	0	0	0	0	0	0	0	0	0	0	0	0	0	0	0	0	0	0	0	0	0	0	0	0	0	0	0	0	0	0
1618	0	0	0	0	0	0	0	0	0	0	0	0	0	0	0	0	0	0	0	0	0	0	0	0	0	0	0	0	0	0	0	0	0
1619	0	0	0	0	0	0	0	0	0	0	0	0	0	0	0	0	0	0	0	0	0	0	0	0	0	0	0	0	0	0	0	0	0
1620	0	0	0	0	0	0	0	0	0	0	0	0	0	0	0	0	0	0	0	0	0	0	0	0	0	0	0	0	0	0	0	0	0
1621	0	0	0	0	0	0	0	0	0	0	0	0	0	0	0	0	0	0	0	0	0	0	0	0	0	0	0	0	0	0	0	0	0
1622	0	0	0	0	0	0	0	0	0	0	0	0	0	0	0	0	0	0	0	0	0	0	0	0	0	0	0	0	0	0	0	0	0
1623	0	0	0	0	0	0	0	0	0	0	0	0	0	0	0	0	0	0	0	0	0	0	0	0	0	0	0	0	0	0	0	0	0
1624	0	0	0	0	0	0	0	0	0	0	0	0	0	0	0	0	0	0	0	0	0	0	0	0	0	0	0	0	0	0	0	0	0
1625	0	0	0	0	0	0	0	0	0	0	0	0	0	0	0	0	0	0	0	0	0	0	0	0	0	0	0	0	0	0	0	0	0
1626	0	0	0	0	0	0	0	0	0	0	0	0	0	0	0	0	0	0	0	0	0	0	0	0	0	0	0	0	0	0	0	0	0
1627	0	0	0	0	0	0	0	0	0	0	0	0	0	0	0	0	0	0	0	0	0	0	0	0	0	0	0	0	0	0	0	0	0
1628	0	0	0	0	0	0	0	0	0	0	0	0	0	0	0	0	0	0	0	0	0	0	0	0	0	0	0	0	0	0	0	0	0
1629	0	0	0	0	0	0	0	0	0	0	0	0	0	0	0	0	0	0	0	0	0	0	0	0	0	0	0	0	0	0	0	0	0
1630	0	0	0	0	0	0	0	0	0	0	0	0	0	0	0	0	0	0	0	0	0	0	0	0	0	0	0	0	0	0	0	0	0
1631	0	0	0	0	0	0	0	0	0	0	0	0	0	0	0	0	0	0	0	0	0	0	0	0	0	0	0	0	0	0	0	0	0
1632	0	0	0	0	0	0	0	0	0	0	0	0	0	0	0	0	0	0	0	0	0	0	0	0	0	0	0	0	0	0	0	0	0
1633	0	0	0	0	0	0	0	0	0	0	0	0	0	0	0	0	0	0	0	0	0	0	0	0	0	0	0	0	0	0	0	0	0
1634	0	0	0	0	0	0	0	0	0	0	0	0	0	0	0	0	0	0	0	0	0	0	0	0	0	0	0	0	0	0	0	0	0
1635	0	0	0	0	0	0	0	0	0	0	0	0	0	0	0	0	0	0	0	0	0	0	0	0	0	0	0	0	0	0	0	0	0
1636	0	0	0	0	0	0	0	0	0	0	0	0	0	0	0	0	0	0	0	0	0	0	0	0	0	0	0	0	0	0	0	0	0
1637	0	0	0	0	0	0	0	0	0	0	0	0	0	0	0	0	0	0	0	0	0	0	0	0	0	0	0	0	0	0	0	0	0
1638	0	0	0	0	0	0	0	0	0	0	0	0	0	0	0	0	0	0	0	0	0	0	0	0	0	0	0	0	0	0	0	0	0
1639	0	0	0	0	0	0	0	0	0	0	0	0	0	0	0	0	0	0	0	0	0	0	0	0	0	0	0	0	0	0	0	0	0
1640	0	0	0	0	0	0	0	0	0	0	0	0	0	0	0	0	0	0	0	0	0	0	0	0	0	0	0	0	0	0	0	0	0
1641	0	0	0	0	0	0	0	0	0	0	0	0	0	0	0	0	0	0	0	0	0	0	0	0	0	0	0	0	0	0	0	0	0
1642	0	0	0	0	0	0	0	0	0	0	0	0	0	0	0	0	0	0	0	0	0	0	0	0	0	0	0	0	0	0	0	0	0
1643	0	0	0	0	0	0	0	0	0	0	0	0	0	0	0	0	0	0	0	0	0	0	0	0	0	0	0	0	0	0	0	0	0
1644	0	0	0	0	0	0	0	0	0	0	0	0	0	0	0	0	0	0	0	0	0	0	0	0	0	0	0	0	0	0	0	0	0
1645	0	0	0	0	0	0	0	0	0	0	0	0	0	0	0	0	0	0	0	0	0	0	0	0	0	0	0	0	0	0	0	0	0
1646	0	0	0	0	0	0	0	0	0	0	0	0	0	0	0	0	0	0	0	0	0	0	0	0	0	0	0	0	0	0	0	0	0
1647	0	0	0	0	0	0	0	0	0	0	0	0	0	0	0	0	0	0	0	0	0	0	0	0	0	0	0	0	0	0	0	0	0
1648	0	0	0	0	0	0	0	0	0	0	0	0	0	0	0	0	0	0	0	0	0	0	0	0	0	0	0	0	0	0	0	0	0
1649	0	0	0	0	0	0	0	0	0	0	0	0	0	0	0	0	0	0	0	0	0	0	0	0	0	0	0	0	0	0	0	0	0
1650	0	0	0	0	0	0	0	0	0	0	0	0	0	0	0	0	0	0	0	0	0	0	0	0	0	0	0	0	0	0	0	0	0
1651	0	0	0	0	0	0	0	0	0	0	0	0	0	0	0	0	0	0	0	0	0	0	0	0	0	0	0	0	0	0	0	0	0
1652	0	0	0	0	0	0	0	0	0	0	0	0	0	0	0	0	0	0	0	0	0	0	0	0	0	0	0	0	0	0	0	0	0
1653	0	0	0	0	0	0	0	0	0	0	0	0	0	0	0	0	0	0	0	0	0	0	0	0	0	0	0	0	0	0	0	0	0
1654	0	0	0	0	0	0	0	0	0	0	0	0	0	0	0	0	0	0	0	0	0	0	0	0	0	0	0	0	0	0	0	0	0
1655	0	0	0	0	0	0	0	0	0	0	0	0	0	0	0	0	0	0	0	0	0	0	0	0	0	0	0	0	0	0	0	0	0
1656	0	0	0	0	0	0	0	0	0	0	0	0	0	0	0	0	0	0	0	0	0	0	0	0	0	0	0	0	0	0	0	0	0
1657	0	0	0	0	0	0	0	0	0	0	0	0	0	0	0	0	0	0	0	0	0	0	0	0	0	0	0	0	0	0	0	0	0
1658	0	0	0	0	0	0	0	0	0	0	0	0	0	0	0	0	0	0	0	0	0	0	0	0	0	0	0	0	0	0	0	0	0
1659	0	0	0	0	0	0	0	0	0	0	0	0	0	0	0	0	0	0	0	0	0	0	0	0	0	0	0	0	0	0	0	0	0
1660	0	0	0	0	0	0	0	0	0	0	0	0	0	0	0	0	0	0	0	0	0	0	0	0	0	0	0	0	0	0	0	0	0
1661	0	0	0	0	0	0	0	0	0	0	0	0	0	0	0	0	0	0	0	0	0	0	0	0	0	0	0	0	0	0	0	0	0
1662	0	0	0	0	0	0	0	0	0	0	0	0	0	0	0	0	0	0	0	0	0	0	0	0	0	0	0	0	0	0	0	0	0
1663	0	0	0	0	0	0	0	0	0	0	0	0	0	0	0	0	0	0	0	0	0	0	0	0	0	0	0	0	0	0	0	0	0
1664	0	0	0	0	0	0	0	0	0	0	0	0	0	0	0	0	0	0	0	0	0	0	0	0	0	0	0	0	0	0	0	0	0
1665	0	0	0	0	0	0	0	0	0	0	0	0	0	0	0	0	0	0	0	0	0	0	0	0	0	0	0	0	0	0	0	0	0
1666	0	0	0	0	0	0	0	0	0	0	0	0	0	0	0	0	0	0	0	0	0	0	0	0	0	0	0	0	0	0	0	0	0
1667	0	0	0	0	0	0	0	0	0	0	0	0	0	0	0	0	0	0	0	0	0	0	0	0	0	0	0	0	0	0	0	0	0
1668	0	0	0	0	0	0	0	0	0	0	0	0	0	0	0	0	0	0	0	0	0	0	0	0	0	0	0	0	0	0	0	0	0
1669	0	0	0	0	0	0	0	0	0	0	0	0	0	0	0	0	0	0	0	0	0	0	0	0	0	0	0	0	0	0	0	0	0
1670	0	0	0	0	0	0	0	0	0	0	0	0	0	0	0	0	0	0	0	0	0	0	0	0	0	0	0	0	0	0	0	0	0
1671	0	0	0	0	0	0	0	0	0	0	0	0	0	0	0	0	0	0	0	0	0	0	0	0	0	0	0	0	0	0	0	0	0
1672	0	0	0	0	0	0	0	0	0	0	0	0	0	0	0	0	0	0	0	0	0	0	0	0	0	0	0	0	0	0	0	0	0
1673	0	0	0	0	0	0	0	0	0	0	0	0	0	0	0	0	0	0	0	0	0	0	0	0	0	0	0	0	0	0	0	0	0
1674	0	0	0	0	0	0	0	0	0	0	0	0	0	0	0	0	0	0	0	0	0	0	0	0	0	0	0	0	0	0	0	0	0
1675	0	0	0	0	0	0	0	0	0	0	0	0	0	0	0	0	0	0	0	0	0	0	0	0	0	0	0	0	0	0	0	0	0
1676	0	0	0	0	0	0	0	0	0	0	0	0	0	0	0	0	0	0	0	0	0	0	0	0	0	0	0	0	0	0	0	0	0
1677	0	0	0	0	0	0	0	0	0	0	0	0	0	0	0	0	0	0	0	0	0	0	0	0	0	0	0	0	0	0	0	0	0
1678	0	0	0	0	0	0	0	0	0	0	0	0	0	0	0	0	0	0	0	0	0	0	0	0	0	0	0	0	0	0	0	0	0
1679	0	0	0	0	0	0	0	0	0	0	0	0	0	0	0	0	0	0	0	0	0	0	0	0	0	0	0	0	0	0	0	0	0
1680	0	0	0	0	0	0	0	0	0	0	0	0	0	0	0	0	0	0	0	0	0	0	0	0	0	0	0	0	0	0	0	0	0
1681	0	0	0	0	0	0	0	0	0	0	0	0	0	0	0	0	0	0	0	0	0	0	0	0	0	0	0	0	0	0	0	0	0
1682	0	0	0	0	0	0	0	0	0	0	0	0	0	0	0	0	0	0	0	0	0	0	0	0	0	0	0	0	0	0	0	0	0
1683	0	0	0	0	0	0	0	0	0	0	0	0	0	0	0	0	0	0	0	0	0	0	0	0	0	0	0	0	0	0	0	0	0
1684	0	0	0	0	0	0	0	0	0	0	0	0	0	0	0	0	0	0	0	0	0	0	0	0	0	0	0	0	0	0	0	0	0
1685	0	0	0	0	0	0	0	0	0	0	0	0	0	0	0	0	0	0	0	0	0	0	0	0	0	0	0	0	0	0	0	0	0
1686	0	0	0	0	0	0	0	0	0	0	0	0	0	0	0	0	0	0	0	0	0	0	0	0	0	0	0	0	0	0	0	0	0
1687	0	0	0	0	0	0	0	0	0	0	0	0	0	0	0	0	0	0	0	0	0	0	0	0	0	0	0	0	0	0	0	0	0
1688	0	0	0	0	0	0	0	0	0	0	0	0	0	0	0	0	0	0	0	0	0	0	0	0	0	0	0	0	0	0	0	0	0
1689	0	0	0	0	0	0	0	0	0	0	0	0	0	0	0	0	0	0	0	0	0	0	0	0	0	0	0	0	0	0	0	0	0
1690	0	0	0	0	0	0	0	0	0	0	0	0	0	0	0	0	0	0	0	0	0	0	0	0	0	0	0	0	0	0	0	0	0
1691	0	0	0	0	0	0	0	0	0	0	0	0	0	0	0	0	0	0	0	0	0	0	0	0	0	0	0	0	0	0	0	0	0
1692	0	0	0	0	0	0	0	0	0	0	0	0	0	0	0	0	0	0	0	0	0	0	0	0	0	0	0	0	0	0	0	0	0
1693	0	0	0	0	0	0	0	0	0	0	0	0	0	0	0	0	0	0	0	0	0	0	0	0	0	0	0	0	0	0	0	0	0
1694	0	0	0	0	0	0	0	0	0	0	0	0	0	0	0	0	0	0	0	0	0	0	0	0	0	0	0	0	0	0	0	0	0
1695	0	0	0	0	0	0	0	0	0	0	0	0	0	0	0	0	0	0	0	0	0	0	0	0	0	0	0	0	0	0	0	0	0
1696	0	0	0	0	0	0	0	0	0	0	0	0	0	0	0	0	0	0	0	0	0	0	0	0	0	0	0	0	0	0	0	0	0
1697	0	0	0	0	0	0	0	0	0	0	0	0	0	0	0	0	0	0	0	0	0	0	0	0	0	0	0	0	0	0	0	0	0
1698	0	0	0	0	0	0	0	0	0	0	0	0	0	0	0	0	0	0	0	0	0	0	0	0	0	0	0	0	0	0	0	0	0
1699	0	0	0	0	0	0	0	0	0	0	0	0	0	0	0	0	0	0	0	0	0	0	0	0	0	0	0	0	0	0	0	0	0
1700	0	0	0	0	0	0	0	0	0	0	0	0	0	0	0	0	0	0	0	0	0	0	0	0	0	0	0	0	0	0	0	0	0
1701	0	0	0	0	0	0	0	0	0	0	0	0	0	0	0	0	0	0	0	0	0	0	0	0	0	0	0	0	0	0	0	0	0
1702	0	0	0	0	0	0	0	0	0	0	0	0	0	0	0	0	0	0	0	0	0	0	0	0	0	0	0	0	0	0	0	0	0
1703	0	0	0	0	0	0	0	0	0	0	0	0	0	0	0	0	0	0	0	0	0	0	0	0	0	0	0	0	0	0	0	0	0
1704	0	0	0	0	0	0	0	0	0	0	0	0	0	0	0	0	0	0	0	0	0	0	0	0	0	0	0	0	0	0	0	0	0
1705	0	0	0	0	0	0	0	0	0	0	0	0	0	0	0	0	0	0	0	0	0	0	0	0	0	0	0	0	0	0	0	0	0
1706	0	0	0	0	0	0	0	0	0	0	0	0	0	0	0	0	0	0	0	0	0	0	0	0	0	0	0	0	0	0	0	0	0
1707	0	0	0	0	0	0	0	0	0	0	0	0	0	0	0	0	0	0	0	0	0	0	0	0	0	0	0	0	0	0	0	0	0
1708	0	0	0	0	0	0	0	0	0	0	0	0	0	0	0	0	0	0	0	0	0	0	0	0	0	0	0	0	0	0	0	0	0
1709	0	0	0	0	0	0	0	0	0	0	0	0	0	0	0	0	0	0	0	0	0	0	0	0	0	0	0	0	0	0	0	0	0
1710	0	0	0	0	0	0	0	0	0	0	0	0	0	0	0	0	0	0	0	0	0	0	0	0	0	0	0	0	0	0	0	0	0
1711	0	0	0	0	0	0	0	0	0	0	0	0	0	0	0	0	0	0	0	0	0	0	0	0	0	0	0	0	0	0	0	0	0
1712	0	0	0	0	0	0	0	0	0	0	0	0	0	0	0	0	0	0	0	0	0	0	0	0	0	0	0	0	0	0	0	0	0
1713	0	0	0	0	0	0	0	0	0	0	0	0	0	0	0	0	0	0	0	0	0	0	0	0	0	0	0	0	0	0	0	0	0
1714	0	0	0	0	0	0	0	0	0	0	0	0	0	0	0	0	0	0	0	0	0	0	0	0	0	0	0	0	0	0	0	0	0
1715	0	0	0	0	0	0	0	0	0	0	0	0	0	0	0	0	0	0	0	0	0	0	0	0	0	0	0	0	0	0	0	0	0
1716	0	0	0	0	0	0	0	0	0	0	0	0	0	0	0	0	0	0	0	0	0	0	0	0	0	0	0	0	0	0	0	0	0
1717	0	0	0	0	0	0	0	0	0	0	0	0	0	0	0	0	0	0	0	0	0	0	0	0	0	0	0	0	0	0	0	0	0
1718	0	0	0	0	0	0	0	0	0	0	0	0	0	0	0	0	0	0	0	0	0	0	0	0	0	0	0	0	0	0	0	0	0
1719	0	0	0	0	0	0	0	0	0	0	0	0	0	0	0	0	0	0	0	0	0	0	0	0	0	0	0	0	0	0	0	0	0
1720	0	0	0	0	0	0	0	0	0	0	0	0	0	0	0	0	0	0	0	0	0	0	0	0	0	0	0	0	0	0	0	0	0
1721	0	0	0	0	0	0	0	0	0	0	0	0	0	0	0	0	0	0	0	0	0	0	0	0	0	0	0	0	0	0	0	0	0
1722	0	0	0	0	0	0	0	0	0	0	0	0	0	0	0	0	0	0	0	0	0	0	0	0	0	0	0	0	0	0	0	0	0
1723	0	0	0	0	0	0	0	0	0	0	0	0	0	0	0	0	0	0	0	0	0	0	0	0	0	0	0	0	0	0	0	0	0
1724	0	0	0	0	0	0	0	0	0	0	0	0	0	0	0	0	0	0	0	0	0	0	0	0	0	0	0	0	0	0	0	0	0
1725	0	0	0	0	0	0	0	0	0	0	0	0	0	0	0	0	0	0	0	0	0	0	0	0	0	0	0	0	0	0	0	0	0
1726	0	0	0	0	0	0	0	0	0	0	0	0	0	0	0	0	0	0	0	0	0	0	0	0	0	0	0	0	0	0	0	0	0
1727	0	0	0	0	0	0	0	0	0	0	0	0	0	0	0	0	0	0	0	0	0	0	0	0	0	0	0	0	0	0	0	0	0
1728	0	0	0	0	0	0	0	0	0	0	0	0	0	0	0	0	0	0	0	0	0	0	0	0	0	0	0	0	0	0	0	0	0
1729	0	0	0	0	0	0	0	0	0	0	0	0	0	0	0	0	0	0	0	0	0	0	0	0	0	0	0	0	0	0	0	0	0
1730	0	0	0	0	0	0	0	0	0	0	0	0	0	0	0	0	0	0	0	0	0	0	0	0	0	0	0	0	0	0	0	0	0
1731	0	0	0	0	0	0	0	0	0	0	0	0	0	0	0	0	0	0	0	0	0	0	0	0	0	0	0	0	0	0	0	0	0
1732	0	0	0	0	0	0	0	0	0	0	0	0	0	0	0	0	0	0	0	0	0	0	0	0	0	0	0	0	0	0	0	0	0
1733	0	0	0	0	0	0	0	0	0	0	0	0	0	0	0	0	0	0	0	0	0	0	0	0	0	0	0	0	0	0	0	0	0
1734	0	0	0	0	0	0	0	0	0	0	0	0	0	0	0	0	0	0	0	0	0	0	0	0	0	0	0	0	0	0	0	0	0
1735	0	0	0	0	0	0	0	0	0	0	0	0	0	0	0	0	0	0	0	0	0	0	0	0	0	0	0	0	0	0	0	0	0
1736	0	0	0	0	0	0	0	0	0	0	0	0	0	0	0	0	0	0	0	0	0	0	0	0	0	0	0	0	0	0	0	0	0
1737	0	0	0	0	0	0	0	0	0	0	0	0	0	0	0	0	0	0	0	0	0	0	0	0	0	0	0	0	0	0	0	0	0
1738	0	0	0	0	0	0	0	0	0	0	0	0	0	0	0	0	0	0	0	0	0	0	0	0	0	0	0	0	0	0	0	0	0
1739	0	0	0	0	0	0	0	0	0	0	0	0	0	0	0	0	0	0	0	0	0	0	0	0	0	0	0	0	0	0	0	0	0
1740	0	0	0	0	0	0	0	0	0	0	0	0	0	0	0	0	0	0	0	0	0	0	0	0	0	0	0	0	0	0	0	0	0
1741	0	0	0	0	0	0	0	0	0	0	0	0	0	0	0	0	0	0	0	0	0	0	0	0	0	0	0	0	0	0	0	0	0
1742	0	0	0	0	0	0	0	0	0	0	0	0	0	0	0	0	0	0	0	0	0	0	0	0	0	0	0	0	0	0	0	0	0
1743	0	0	0	0	0	0	0	0	0	0	0	0	0	0	0	0	0	0	0	0	0	0	0	0	0	0	0	0	0	0	0	0	0
1744	0	0	0	0	0	0	0	0	0	0	0	0	0	0	0	0	0	0	0	0	0	0	0	0	0	0	0	0	0	0	0	0	0
1745	0	0	0	0	0	0	0	0	0	0	0	0	0	0	0	0	0	0	0	0	0	0	0	0	0	0	0	0	0	0	0	0	0
1746	0	0	0	0	0	0	0	0	0	0	0	0	0	0	0	0	0	0	0	0	0	0	0	0	0	0	0	0	0	0	0	0	0
1747	0	0	0	0	0	0	0	0	0	0	0	0	0	0	0	0	0	0	0	0	0	0	0	0	0	0	0	0	0	0	0	0	0
1748	0	0	0	0	0	0	0	0	0	0	0	0	0	0	0	0	0	0	0	0	0	0	0	0	0	0	0	0	0	0	0	0	0
1749	0	0	0	0	0	0	0	0	0	0	0	0	0	0	0	0	0	0	0	0	0	0	0	0	0	0	0	0	0	0	0	0	0
1750	0	0	0	0	0	0	0	0	0	0	0	0	0	0	0	0	0	0	0	0	0	0	0	0	0	0	0	0	0	0	0	0	0
1751	0	0	0	0	0	0	0	0	0	0	0	0	0	0	0	0	0	0	0	0	0	0	0	0	0	0	0	0	0	0	0	0	0
1752	0	0	0	0	0	0	0	0	0	0	0	0	0	0	0	0	0	0	0	0	0	0	0	0	0	0	0	0	0	0	0	0	0
1753	0	0	0	0	0	0	0	0	0	0	0	0	0	0	0	0	0	0	0	0	0	0	0	0	0	0	0	0	0	0	0	0	0
1754	0	0	0	0	0	0	0	0	0	0	0	0	0	0	0	0	0	0	0	0	0	0	0	0	0	0	0	0	0	0	0	0	0
1755	0	0	0	0	0	0	0	0	0	0	0	0	0	0	0	0	0	0	0	0	0	0	0	0	0	0	0	0	0	0	0	0	0
1756	0	0	0	0	0	0	0	0	0	0	0	0	0	0	0	0	0	0	0	0	0	0	0	0	0	0	0	0	0	0	0	0	0
1757	0	0	0	0	0	0	0	0	0	0	0	0	0	0	0	0	0	0	0	0	0	0	0	0	0	0	0	0	0	0	0	0	0
1758	0	0	0	0	0	0	0	0	0	0	0	0	0	0	0	0	0	0	0	0	0	0	0	0	0	0	0	0	0	0	0	0	0
1759	0	0	0	0	0	0	0	0	0	0	0	0	0	0	0	0	0	0	0	0	0	0	0	0	0	0	0	0	0	0	0	0	0
1760	0	0	0	0	0	0	0	0	0	0	0	0	0	0	0	0	0	0	0	0	0	0	0	0	0	0	0	0	0	0	0	0	0
1761	0	0	0	0	0	0	0	0	0	0	0	0	0	0	0	0	0	0	0	0	0	0	0	0	0	0	0	0	0	0	0	0	0
1762	0	0	0	0	0	0	0	0	0	0	0	0	0	0	0	0	0	0	0	0	0	0	0	0	0	0	0	0	0	0	0	0	0
1763	0	0	0	0	0	0	0	0	0	0	0	0	0	0	0	0	0	0	0	0	0	0	0	0	0	0	0	0	0	0	0	0	0
1764	0	0	0	0	0	0	0	0	0	0	0	0	0	0	0	0	0	0	0	0	0	0	0	0	0	0	0	0	0	0	0	0	0
1765	0	0	0	0	0	0	0	0	0	0	0	0	0	0	0	0	0	0	0	0	0	0	0	0	0	0	0	0	0	0	0	0	0
1766	0	0	0	0	0	0	0	0	0	0	0	0	0	0	0	0	0	0	0	0	0	0	0	0	0	0	0	0	0	0	0	0	0
1767	0	0	0	0	0	0	0	0	0	0	0	0	0	0	0	0	0	0	0	0	0	0	0	0	0	0	0	0	0	0	0	0	0
1768	0	0	0	0	0	0	0	0	0	0	0	0	0	0	0	0	0	0	0	0	0	0	0	0	0	0	0	0	0	0	0	0	0
1769	0	0	0	0	0	0	0	0	0	0	0	0	0	0	0	0	0	0	0	0	0	0	0	0	0	0	0	0	0	0	0	0	0
1770	0	0	0	0	0	0	0	0	0	0	0	0	0	0	0	0	0	0	0	0	0	0	0	0	0	0	0	0	0	0	0	0	0
1771	0	0	0	0	0	0	0	0	0	0	0	0	0	0	0	0	0	0	0	0	0	0	0	0	0	0	0	0	0	0	0	0	0
1772	0	0	0	0	0	0	0	0	0	0	0	0	0	0	0	0	0	0	0	0	0	0	0	0	0	0	0	0	0	0	0	0	0
1773	0	0	0	0	0	0	0	0	0	0	0	0	0	0	0	0	0	0	0	0	0	0	0	0	0	0	0	0	0	0	0	0	0
1774	0	0	0	0	0	0	0	0	0	0	0	0	0	0	0	0	0	0	0	0	0	0	0	0	0	0	0	0	0	0	0	0	0
1775	0	0	0	0	0	0	0	0	0	0	0	0	0	0	0	0	0	0	0	0	0	0	0	0	0	0	0	0	0	0	0	0	0
1776	0	0	0	0	0	0	0	0	0	0	0	0	0	0	0	0	0	0	0	0	0	0	0	0	0	0	0	0	0	0	0	0	0
1777	0	0	0	0	0	0	0	0	0	0	0	0	0	0	0	0	0	0	0	0	0	0	0	0	0	0	0	0	0	0	0	0	0
1778	0	0	0	0	0	0	0	0	0	0	0	0	0	0	0	0	0	0	0	0	0	0	0	0	0	0	0	0	0	0	0	0	0
1779	0	0	0	0	0	0	0	0	0	0	0	0	0	0	0	0	0	0	0	0	0	0	0	0	0	0	0	0	0	0	0	0	0
1780	0	0	0	0	0	0	0	0	0	0	0	0	0	0	0	0	0	0	0	0	0	0	0	0	0	0	0	0	0	0	0	0	0
1781	0	0	0	0	0	0	0	0	0	0	0	0	0	0	0	0	0	0	0	0	0	0	0	0	0	0	0	0	0	0	0	0	0
1782	0	0	0	0	0	0	0	0	0	0	0	0	0	0	0	0	0	0	0	0	0	0	0	0	0	0	0	0	0	0	0	0	0
1783	0	0	0	0	0	0	0	0	0	0	0	0	0	0	0	0	0	0	0	0	0	0	0	0	0	0	0	0	0	0	0	0	0
1784	0	0	0	0	0	0	0	0	0	0	0	0	0	0	0	0	0	0	0	0	0	0	0	0	0	0	0	0	0	0	0	0	0
1785	0	0	0	0	0	0	0	0	0	0	0	0	0	0	0	0	0	0	0	0	0	0	0	0	0	0	0	0	0	0	0	0	0
1786	0	0	0	0	0	0	0	0	0	0	0	0	0	0	0	0	0	0	0	0	0	0	0	0	0	0	0	0	0	0	0	0	0
1787	0	0	0	0	0	0	0	0	0	0	0	0	0	0	0	0	0	0	0	0	0	0	0	0	0	0	0	0	0	0	0	0	0
1788	0	0	0	0	0	0	0	0	0	0	0	0	0	0	0	0	0	0	0	0	0	0	0	0	0	0	0	0	0	0	0	0	0
1789	0	0	0	0	0	0	0	0	0	0	0	0	0	0	0	0	0	0	0	0	0	0	0	0	0	0	0	0	0	0	0	0	0
1790	0	0	0	0	0	0	0	0	0	0	0	0	0	0	0	0	0	0	0	0	0	0	0	0	0	0	0	0	0	0	0	0	0
1791	0	0	0	0	0	0	0	0	0	0	0	0	0	0	0	0	0	0	0	0	0	0	0	0	0	0	0	0	0	0	0	0	0
1792	0	0	0	0	0	0	0	0	0	0	0	0	0	0	0	0	0	0	0	0	0	0	0	0	0	0	0	0	0	0	0	0	0
1793	0	0	0	0	0	0	0	0	0	0	0	0	0	0	0	0	0	0	0	0	0	0	0	0	0	0	0	0	0	0	0	0	0
1794	0	0	0	0	0	0	0	0	0	0	0	0	0	0	0	0	0	0	0	0	0	0	0	0	0	0	0	0	0	0	0	0	0
1795	0	0	0	0	0	0	0	0	0	0	0	0	0	0	0	0	0	0	0	0	0	0	0	0	0	0	0	0	0	0	0	0	0
1796	0	0	0	0	0	0	0	0	0	0	0	0	0	0	0	0	0	0	0	0	0	0	0	0	0	0	0	0	0	0	0	0	0
1797	0	0	0	0	0	0	0	0	0	0	0	0	0	0	0	0	0	0	0	0	0	0	0	0	0	0	0	0	0	0	0	0	0
1798	0	0	0	0	0	0	0	0	0	0	0	0	0	0	0	0	0	0	0	0	0	0	0	0	0	0	0	0	0	0	0	0	0
1799	0	0	0	0	0	0	0	0	0	0	0	0	0	0	0	0	0	0	0	0	0	0	0	0	0	0	0	0	0	0	0	0	0
1800	0	0	0	0	0	0	0	0	0	0	0	0	0	0	0	0	0	0	0	0	0	0	0	0	0	0	0	0	0	0	0	0	0
1801	0	0	0	0	0	0	0	0	0	0	0	0	0	0	0	0	0	0	0	0	0	0	0	0	0	0	0	0	0	0	0	0	0
1802	0	0	0	0	0	0	0	0	0	0	0	0	0	0	0	0	0	0	0	0	0	0	0	0	0	0	0	0	0	0	0	0	0
1803	0	0	0	0	0	0	0	0	0	0	0	0	0	0	0	0	0	0	0	0	0	0	0	0	0	0	0	0	0	0	0	0	0
1804	0	0	0	0	0	0	0	0	0	0	0	0	0	0	0	0	0	0	0	0	0	0	0	0	0	0	0	0	0	0	0	0	0
1805	0	0	0	0	0	0	0	0	0	0	0	0	0	0	0	0	0	0	0	0	0	0	0	0	0	0	0	0	0	0	0	0	0
1806	0	0	0	0	0	0	0	0	0	0	0	0	0	0	0	0	0	0	0	0	0	0	0	0	0	0	0	0	0	0	0	0	0
1807	0	0	0	0	0	0	0	0	0	0	0	0	0	0	0	0	0	0	0	0	0	0	0	0	0	0	0	0	0	0	0	0	0
1808	0	0	0	0	0	0	0	0	0	0	0	0	0	0	0	0	0	0	0	0	0	0	0	0	0	0	0	0	0	0	0	0	0
1809	0	0	0	0	0	0	0	0	0	0	0	0	0	0	0	0	0	0	0	0	0	0	0	0	0	0	0	0	0	0	0	0	0
1810	0	0	0	0	0	0	0	0	0	0	0	0	0	0	0	0	0	0	0	0	0	0	0	0	0	0	0	0	0	0	0	0	0
1811	0	0	0	0	0	0	0	0	0	0	0	0	0	0	0	0	0	0	0	0	0	0	0	0	0	0	0	0	0	0	0	0	0
1812	0	0	0	0	0	0	0	0	0	0	0	0	0	0	0	0	0	0	0	0	0	0	0	0	0	0	0	0	0	0	0	0	0
1813	0	0	0	0	0	0	0	0	0	0	0	0	0	0	0	0	0	0	0	0	0	0	0	0	0	0	0	0	0	0	0	0	0
1814	0	0	0	0	0	0	0	0	0	0	0	0	0	0	0	0	0	0	0	0	0	0	0	0	0	0	0	0	0	0	0	0	0
1815	0	0	0	0	0	0	0	0	0	0	0	0	0	0	0	0	0	0	0	0	0	0	0	0	0	0	0	0	0	0	0	0	0
1816	0	0	0	0	0	0	0	0	0	0	0	0	0	0	0	0	0	0	0	0	0	0	0	0	0	0	0	0	0	0	0	0	0
1817	0	0	0	0	0	0	0	0	0	0	0	0	0	0	0	0	0	0	0	0	0	0	0	0	0	0	0	0	0	0	0	0	0
1818	0	0	0	0	0	0	0	0	0	0	0	0	0	0	0	0	0	0	0	0	0	0	0	0	0	0	0	0	0	0	0	0	0
1819	0	0	0	0	0	0	0	0	0	0	0	0	0	0	0	0	0	0	0	0	0	0	0	0	0	0	0	0	0	0	0	0	0
1820	0	0	0	0	0	0	0	0	0	0	0	0	0	0	0	0	0	0	0	0	0	0	0	0	0	0	0	0	0	0	0	0	0
1821	0	0	0	0	0	0	0	0	0	0	0	0	0	0	0	0	0	0	0	0	0	0	0	0	0	0	0	0	0	0	0	0	0
1822	0	0	0	0	0	0	0	0	0	0	0	0	0	0	0	0	0	0	0	0	0	0	0	0	0	0	0	0	0	0	0	0	0
1823	0	0	0	0	0	0	0	0	0	0	0	0	0	0	0	0	0	0	0	0	0	0	0	0	0	0	0	0	0	0	0	0	0
1824	0	0	0	0	0	0	0	0	0	0	0	0	0	0	0	0	0	0	0	0	0	0	0	0	0	0	0	0	0	0	0	0	0
1825	0	0	0	0	0	0	0	0	0	0	0	0	0	0	0	0	0	0	0	0	0	0	0	0	0	0	0	0	0	0	0	0	0
1826	0	0	0	0	0	0	0	0	0	0	0	0	0	0	0	0	0	0	0	0	0	0	0	0	0	0	0	0	0	0	0	0	0
1827	0	0	0	0	0	0	0	0	0	0	0	0	0	0	0	0	0	0	0	0	0	0	0	0	0	0	0	0	0	0	0	0	0
1828	0	0	0	0	0	0	0	0	0	0	0	0	0	0	0	0	0	0	0	0	0	0	0	0	0	0	0	0	0	0	0	0	0
1829	0	0	0	0	0	0	0	0	0	0	0	0	0	0	0	0	0	0	0	0	0	0	0	0	0	0	0	0	0	0	0	0	0
1830	0	0	0	0	0	0	0	0	0	0	0	0	0	0	0	0	0	0	0	0	0	0	0	0	0	0	0	0	0	0	0	0	0
1831	0	0	0	0	0	0	0	0	0	0	0	0	0	0	0	0	0	0	0	0	0	0	0	0	0	0	0	0	0	0	0	0	0
1832	0	0	0	0	0	0	0	0	0	0	0	0	0	0	0	0	0	0	0	0	0	0	0	0	0	0	0	0	0	0	0	0	0
1833	0	0	0	0	0	0	0	0	0	0	0	0	0	0	0	0	0	0	0	0	0	0	0	0	0	0	0	0	0	0	0	0	0
1834	0	0	0	0	0	0	0	0	0	0	0	0	0	0	0	0	0	0	0	0	0	0	0	0	0	0	0	0	0	0	0	0	0
1835	0	0	0	0	0	0	0	0	0	0	0	0	0	0	0	0	0	0	0	0	0	0	0	0	0	0	0	0	0	0	0	0	0
1836	0	0	0	0	0	0	0	0	0	0	0	0	0	0	0	0	0	0	0	0	0	0	0	0	0	0	0	0	0	0	0	0	0
1837	0	0	0	0	0	0	0	0	0	0	0	0	0	0	0	0	0	0	0	0	0	0	0	0	0	0	0	0	0	0	0	0	0
1838	0	0	0	0	0	0	0	0	0	0	0	0	0	0	0	0	0	0	0	0	0	0	0	0	0	0	0	0	0	0	0	0	0
1839	0	0	0	0	0	0	0	0	0	0	0	0	0	0	0	0	0	0	0	0	0	0	0	0	0	0	0	0	0	0	0	0	0
1840	0	0	0	0	0	0	0	0	0	0	0	0	0	0	0	0	0	0	0	0	0	0	0	0	0	0	0	0	0	0	0	0	0
1841	0	0	0	0	0	0	0	0	0	0	0	0	0	0	0	0	0	0	0	0	0	0	0	0	0	0	0	0	0	0	0	0	0
1842	0	0	0	0	0	0	0	0	0	0	0	0	0	0	0	0	0	0	0	0	0	0	0	0	0	0	0	0	0	0	0	0	0
1843	0	0	0	0	0	0	0	0	0	0	0	0	0	0	0	0	0	0	0	0	0	0	0	0	0	0	0	0	0	0	0	0	0
1844	0	0	0	0	0	0	0	0	0	0	0	0	0	0	0	0	0	0	0	0	0	0	0	0	0	0	0	0	0	0	0	0	0
1845	0	0	0	0	0	0	0	0	0	0	0	0	0	0	0	0	0	0	0	0	0	0	0	0	0	0	0	0	0	0	0	0	0
1846	0	0	0	0	0	0	0	0	0	0	0	0	0	0	0	0	0	0	0	0	0	0	0	0	0	0	0	0	0	0	0	0	0
1847	0	0	0	0	0	0	0	0	0	0	0	0	0	0	0	0	0	0	0	0	0	0	0	0	0	0	0	0	0	0	0	0	0
1848	0	0	0	0	0	0	0	0	0	0	0	0	0	0	0	0	0	0	0	0	0	0	0	0	0	0	0	0	0	0	0	0	0
1849	0	0	0	0	0	0	0	0	0	0	0	0	0	0	0	0	0	0	0	0	0	0	0	0	0	0	0	0	0	0	0	0	0
1850	0	0	0	0	0	0	0	0	0	0	0	0	0	0	0	0	0	0	0	0	0	0	0	0	0	0	0	0	0	0	0	0	0
1851	0	0	0	0	0	0	0	0	0	0	0	0	0	0	0	0	0	0	0	0	0	0	0	0	0	0	0	0	0	0	0	0	0
1852	0	0	0	0	0	0	0	0	0	0	0	0	0	0	0	0	0	0	0	0	0	0	0	0	0	0	0	0	0	0	0	0	0
1853	0	0	0	0	0	0	0	0	0	0	0	0	0	0	0	0	0	0	0	0	0	0	0	0	0	0	0	0	0	0	0	0	0
1854	0	0	0	0	0	0	0	0	0	0	0	0	0	0	0	0	0	0	0	0	0	0	0	0	0	0	0	0	0	0	0	0	0
1855	0	0	0	0	0	0	0	0	0	0	0	0	0	0	0	0	0	0	0	0	0	0	0	0	0	0	0	0	0	0	0	0	0
1856	0	0	0	0	0	0	0	0	0	0	0	0	0	0	0	0	0	0	0	0	0	0	0	0	0	0	0	0	0	0	0	0	0
1857	0	0	0	0	0	0	0	0	0	0	0	0	0	0	0	0	0	0	0	0	0	0	0	0	0	0	0	0	0	0	0	0	0
1858	0	0	0	0	0	0	0	0	0	0	0	0	0	0	0	0	0	0	0	0	0	0	0	0	0	0	0	0	0	0	0	0	0
1859	0	0	0	0	0	0	0	0	0	0	0	0	0	0	0	0	0	0	0	0	0	0	0	0	0	0	0	0	0	0	0	0	0
1860	0	0	0	0	0	0	0	0	0	0	0	0	0	0	0	0	0	0	0	0	0	0	0	0	0	0	0	0	0	0	0	0	0
1861	0	0	0	0	0	0	0	0	0	0	0	0	0	0	0	0	0	0	0	0	0	0	0	0	0	0	0	0	0	0	0	0	0
1862	0	0	0	0	0	0	0	0	0	0	0	0	0	0	0	0	0	0	0	0	0	0	0	0	0	0	0	0	0	0	0	0	0
1863	0	0	0	0	0	0	0	0	0	0	0	0	0	0	0	0	0	0	0	0	0	0	0	0	0	0	0	0	0	0	0	0	0
1864	0	0	0	0	0	0	0	0	0	0	0	0	0	0	0	0	0	0	0	0	0	0	0	0	0	0	0	0	0	0	0	0	0
1865	0	0	0	0	0	0	0	0	0	0	0	0	0	0	0	0	0	0	0	0	0	0	0	0	0	0	0	0	0	0	0	0	0
1866	0	0	0	0	0	0	0	0	0	0	0	0	0	0	0	0	0	0	0	0	0	0	0	0	0	0	0	0	0	0	0	0	0
1867	0	0	0	0	0	0	0	0	0	0	0	0	0	0	0	0	0	0	0	0	0	0	0	0	0	0	0	0	0	0	0	0	0
1868	0	0	0	0	0	0	0	0	0	0	0	0	0	0	0	0	0	0	0	0	0	0	0	0	0	0	0	0	0	0	0	0	0
1869	0	0	0	0	0	0	0	0	0	0	0	0	0	0	0	0	0	0	0	0	0	0	0	0	0	0	0	0	0	0	0	0	0
1870	0	0	0	0	0	0	0	0	0	0	0	0	0	0	0	0	0	0	0	0	0	0	0	0	0	0	0	0	0	0	0	0	0
1871	0	0	0	0	0	0	0	0	0	0	0	0	0	0	0	0	0	0	0	0	0	0	0	0	0	0	0	0	0	0	0	0	0
1872	0	0	0	0	0	0	0	0	0	0	0	0	0	0	0	0	0	0	0	0	0	0	0	0	0	0	0	0	0	0	0	0	0
1873	0	0	0	0	0	0	0	0	0	0	0	0	0	0	0	0	0	0	0	0	0	0	0	0	0	0	0	0	0	0	0	0	0
1874	0	0	0	0	0	0	0	0	0	0	0	0	0	0	0	0	0	0	0	0	0	0	0	0	0	0	0	0	0	0	0	0	0
1875	0	0	0	0	0	0	0	0	0	0	0	0	0	0	0	0	0	0	0	0	0	0	0	0	0	0	0	0	0	0	0	0	0
1876	0	0	0	0	0	0	0	0	0	0	0	0	0	0	0	0	0	0	0	0	0	0	0	0	0	0	0	0	0	0	0	0	0
1877	0	0	0	0	0	0	0	0	0	0	0	0	0	0	0	0	0	0	0	0	0	0	0	0	0	0	0	0	0	0	0	0	0
1878	0	0	0	0	0	0	0	0	0	0	0	0	0	0	0	0	0	0	0	0	0	0	0	0	0	0	0	0	0	0	0	0	0
1879	0	0	0	0	0	0	0	0	0	0	0	0	0	0	0	0	0	0	0	0	0	0	0	0	0	0	0	0	0	0	0	0	0
1880	0	0	0	0	0	0	0	0	0	0	0	0	0	0	0	0	0	0	0	0	0	0	0	0	0	0	0	0	0	0	0	0	0
1881	0	0	0	0	0	0	0	0	0	0	0	0	0	0	0	0	0	0	0	0	0	0	0	0	0	0	0	0	0	0	0	0	0
1882	0	0	0	0	0	0	0	0	0	0	0	0	0	0	0	0	0	0	0	0	0	0	0	0	0	0	0	0	0	0	0	0	0
1883	0	0	0	0	0	0	0	0	0	0	0	0	0	0	0	0	0	0	0	0	0	0	0	0	0	0	0	0	0	0	0	0	0
1884	0	0	0	0	0	0	0	0	0	0	0	0	0	0	0	0	0	0	0	0	0	0	0	0	0	0	0	0	0	0	0	0	0
1885	0	0	0	0	0	0	0	0	0	0	0	0	0	0	0	0	0	0	0	0	0	0	0	0	0	0	0	0	0	0	0	0	0
1886	0	0	0	0	0	0	0	0	0	0	0	0	0	0	0	0	0	0	0	0	0	0	0	0	0	0	0	0	0	0	0	0	0
1887	0	0	0	0	0	0	0	0	0	0	0	0	0	0	0	0	0	0	0	0	0	0	0	0	0	0	0	0	0	0	0	0	0
1888	0	0	0	0	0	0	0	0	0	0	0	0	0	0	0	0	0	0	0	0	0	0	0	0	0	0	0	0	0	0	0	0	0
1889	0	0	0	0	0	0	0	0	0	0	0	0	0	0	0	0	0	0	0	0	0	0	0	0	0	0	0	0	0	0	0	0	0
1890	0	0	0	0	0	0	0	0	0	0	0	0	0	0	0	0	0	0	0	0	0	0	0	0	0	0	0	0	0	0	0	0	0
1891	0	0	0	0	0	0	0	0	0	0	0	0	0	0	0	0	0	0	0	0	0	0	0	0	0	0	0	0	0	0	0	0	0
1892	0	0	0	0	0	0	0	0	0	0	0	0	0	0	0	0	0	0	0	0	0	0	0	0	0	0	0	0	0	0	0	0	0
1893	0	0	0	0	0	0	0	0	0	0	0	0	0	0	0	0	0	0	0	0	0	0	0	0	0	0	0	0	0	0	0	0	0
1894	0	0	0	0	0	0	0	0	0	0	0	0	0	0	0	0	0	0	0	0	0	0	0	0	0	0	0	0	0	0	0	0	0
1895	0	0	0	0	0	0	0	0	0	0	0	0	0	0	0	0	0	0	0	0	0	0	0	0	0	0	0	0	0	0	0	0	0
1896	0	0	0	0	0	0	0	0	0	0	0	0	0	0	0	0	0	0	0	0	0	0	0	0	0	0	0	0	0	0	0	0	0
1897	0	0	0	0	0	0	0	0	0	0	0	0	0	0	0	0	0	0	0	0	0	0	0	0	0	0	0	0	0	0	0	0	0
1898	0	0	0	0	0	0	0	0	0	0	0	0	0	0	0	0	0	0	0	0	0	0	0	0	0	0	0	0	0	0	0	0	0
1899	0	0	0	0	0	0	0	0	0	0	0	0	0	0	0	0	0	0	0	0	0	0	0	0	0	0	0	0	0	0	0	0	0
1900	0	0	0	0	0	0	0	0	0	0	0	0	0	0	0	0	0	0	0	0	0	0	0	0	0	0	0	0	0	0	0	0	0
1901	0	0	0	0	0	0	0	0	0	0	0	0	0	0	0	0	0	0	0	0	0	0	0	0	0	0	0	0	0	0	0	0	0
1902	0	0	0	0	0	0	0	0	0	0	0	0	0	0	0	0	0	0	0	0	0	0	0	0	0	0	0	0	0	0	0	0	0
1903	0	0	0	0	0	0	0	0	0	0	0	0	0	0	0	0	0	0	0	0	0	0	0	0	0	0	0	0	0	0	0	0	0
1904	0	0	0	0	0	0	0	0	0	0	0	0	0	0	0	0	0	0	0	0	0	0	0	0	0	0	0	0	0	0	0	0	0
1905	0	0	0	0	0	0	0	0	0	0	0	0	0	0	0	0	0	0	0	0	0	0	0	0	0	0	0	0	0	0	0	0	0
1906	0	0	0	0	0	0	0	0	0	0	0	0	0	0	0	0	0	0	0	0	0	0	0	0	0	0	0	0	0	0	0	0	0
1907	0	0	0	0	0	0	0	0	0	0	0	0	0	0	0	0	0	0	0	0	0	0	0	0	0	0	0	0	0	0	0	0	0
1908	0	0	0	0	0	0	0	0	0	0	0	0	0	0	0	0	0	0	0	0	0	0	0	0	0	0	0	0	0	0	0	0	0
1909	0	0	0	0	0	0	0	0	0	0	0	0	0	0	0	0	0	0	0	0	0	0	0	0	0	0	0	0	0	0	0	0	0
1910	0	0	0	0	0	0	0	0	0	0	0	0	0	0	0	0	0	0	0	0	0	0	0	0	0	0	0	0	0	0	0	0	0
1911	0	0	0	0	0	0	0	0	0	0	0	0	0	0	0	0	0	0	0	0	0	0	0	0	0	0	0	0	0	0	0	0	0
1912	0	0	0	0	0	0	0	0	0	0	0	0	0	0	0	0	0	0	0	0	0	0	0	0	0	0	0	0	0	0	0	0	0
1913	0	0	0	0	0	0	0	0	0	0	0	0	0	0	0	0	0	0	0	0	0	0	0	0	0	0	0	0	0	0	0	0	0
1914	0	0	0	0	0	0	0	0	0	0	0	0	0	0	0	0	0	0	0	0	0	0	0	0	0	0	0	0	0	0	0	0	0
1915	0	0	0	0	0	0	0	0	0	0	0	0	0	0	0	0	0	0	0	0	0	0	0	0	0	0	0	0	0	0	0	0	0
1916	0	0	0	0	0	0	0	0	0	0	0	0	0	0	0	0	0	0	0	0	0	0	0	0	0	0	0	0	0	0	0	0	0
1917	0	0	0	0	0	0	0	0	0	0	0	0	0	0	0	0	0	0	0	0	0	0	0	0	0	0	0	0	0	0	0	0	0
1918	0	0	0	0	0	0	0	0	0	0	0	0	0	0	0	0	0	0	0	0	0	0	0	0	0	0	0	0	0	0	0	0	0
1919	0	0	0	0	0	0	0	0	0	0	0	0	0	0	0	0	0	0	0	0	0	0	0	0	0	0	0	0	0	0	0	0	0
1920	0	0	0	0	0	0	0	0	0	0	0	0	0	0	0	0	0	0	0	0	0	0	0	0	0	0	0	0	0	0	0	0	0
1921	0	0	0	0	0	0	0	0	0	0	0	0	0	0	0	0	0	0	0	0	0	0	0	0	0	0	0	0	0	0	0	0	0
1922	0	0	0	0	0	0	0	0	0	0	0	0	0	0	0	0	0	0	0	0	0	0	0	0	0	0	0	0	0	0	0	0	0
1923	0	0	0	0	0	0	0	0	0	0	0	0	0	0	0	0	0	0	0	0	0	0	0	0	0	0	0	0	0	0	0	0	0
1924	0	0	0	0	0	0	0	0	0	0	0	0	0	0	0	0	0	0	0	0	0	0	0	0	0	0	0	0	0	0	0	0	0
1925	0	0	0	0	0	0	0	0	0	0	0	0	0	0	0	0	0	0	0	0	0	0	0	0	0	0	0	0	0	0	0	0	0
1926	0	0	0	0	0	0	0	0	0	0	0	0	0	0	0	0	0	0	0	0	0	0	0	0	0	0	0	0	0	0	0	0	0
1927	0	0	0	0	0	0	0	0	0	0	0	0	0	0	0	0	0	0	0	0	0	0	0	0	0	0	0	0	0	0	0	0	0
1928	0	0	0	0	0	0	0	0	0	0	0	0	0	0	0	0	0	0	0	0	0	0	0	0	0	0	0	0	0	0	0	0	0
1929	0	0	0	0	0	0	0	0	0	0	0	0	0	0	0	0	0	0	0	0	0	0	0	0	0	0	0	0	0	0	0	0	0
1930	0	0	0	0	0	0	0	0	0	0	0	0	0	0	0	0	0	0	0	0	0	0	0	0	0	0	0	0	0	0	0	0	0
1931	0	0	0	0	0	0	0	0	0	0	0	0	0	0	0	0	0	0	0	0	0	0	0	0	0	0	0	0	0	0	0	0	0
1932	0	0	0	0	0	0	0	0	0	0	0	0	0	0	0	0	0	0	0	0	0	0	0	0	0	0	0	0	0	0	0	0	0
1933	0	0	0	0	0	0	0	0	0	0	0	0	0	0	0	0	0	0	0	0	0	0	0	0	0	0	0	0	0	0	0	0	0
1934	0	0	0	0	0	0	0	0	0	0	0	0	0	0	0	0	0	0	0	0	0	0	0	0	0	0	0	0	0	0	0	0	0
1935	0	0	0	0	0	0	0	0	0	0	0	0	0	0	0	0	0	0	0	0	0	0	0	0	0	0	0	0	0	0	0	0	0
1936	0	0	0	0	0	0	0	0	0	0	0	0	0	0	0	0	0	0	0	0	0	0	0	0	0	0	0	0	0	0	0	0	0
1937	0	0	0	0	0	0	0	0	0	0	0	0	0	0	0	0	0	0	0	0	0	0	0	0	0	0	0	0	0	0	0	0	0
1938	0	0	0	0	0	0	0	0	0	0	0	0	0	0	0	0	0	0	0	0	0	0	0	0	0	0	0	0	0	0	0	0	0
1939	0	0	0	0	0	0	0	0	0	0	0	0	0	0	0	0	0	0	0	0	0	0	0	0	0	0	0	0	0	0	0	0	0
1940	0	0	0	0	0	0	0	0	0	0	0	0	0	0	0	0	0	0	0	0	0	0	0	0	0	0	0	0	0	0	0	0	0
1941	0	0	0	0	0	0	0	0	0	0	0	0	0	0	0	0	0	0	0	0	0	0	0	0	0	0	0	0	0	0	0	0	0
1942	0	0	0	0	0	0	0	0	0	0	0	0	0	0	0	0	0	0	0	0	0	0	0	0	0	0	0	0	0	0	0	0	0
1943	0	0	0	0	0	0	0	0	0	0	0	0	0	0	0	0	0	0	0	0	0	0	0	0	0	0	0	0	0	0	0	0	0
1944	0	0	0	0	0	0	0	0	0	0	0	0	0	0	0	0	0	0	0	0	0	0	0	0	0	0	0	0	0	0	0	0	0
1945	0	0	0	0	0	0	0	0	0	0	0	0	0	0	0	0	0	0	0	0	0	0	0	0	0	0	0	0	0	0	0	0	0
1946	0	0	0	0	0	0	0	0	0	0	0	0	0	0	0	0	0	0	0	0	0	0	0	0	0	0	0	0	0	0	0	0	0
1947	0	0	0	0	0	0	0	0	0	0	0	0	0	0	0	0	0	0	0	0	0	0	0	0	0	0	0	0	0	0	0	0	0
1948	0	0	0	0	0	0	0	0	0	0	0	0	0	0	0	0	0	0	0	0	0	0	0	0	0	0	0	0	0	0	0	0	0
1949	0	0	0	0	0	0	0	0	0	0	0	0	0	0	0	0	0	0	0	0	0	0	0	0	0	0	0	0	0	0	0	0	0
1950	0	0	0	0	0	0	0	0	0	0	0	0	0	0	0	0	0	0	0	0	0	0	0	0	0	0	0	0	0	0	0	0	0
1951	0	0	0	0	0	0	0	0	0	0	0	0	0	0	0	0	0	0	0	0	0	0	0	0	0	0	0	0	0	0	0	0	0
1952	0	0	0	0	0	0	0	0	0	0	0	0	0	0	0	0	0	0	0	0	0	0	0	0	0	0	0	0	0	0	0	0	0
1953	0	0	0	0	0	0	0	0	0	0	0	0	0	0	0	0	0	0	0	0	0	0	0	0	0	0	0	0	0	0	0	0	0
1954	0	0	0	0	0	0	0	0	0	0	0	0	0	0	0	0	0	0	0	0	0	0	0	0	0	0	0	0	0	0	0	0	0
1955	0	0	0	0	0	0	0	0	0	0	0	0	0	0	0	0	0	0	0	0	0	0	0	0	0	0	0	0	0	0	0	0	0
1956	0	0	0	0	0	0	0	0	0	0	0	0	0	0	0	0	0	0	0	0	0	0	0	0	0	0	0	0	0	0	0	0	0
1957	0	0	0	0	0	0	0	0	0	0	0	0	0	0	0	0	0	0	0	0	0	0	0	0	0	0	0	0	0	0	0	0	0
1958	0	0	0	0	0	0	0	0	0	0	0	0	0	0	0	0	0	0	0	0	0	0	0	0	0	0	0	0	0	0	0	0	0
1959	0	0	0	0	0	0	0	0	0	0	0	0	0	0	0	0	0	0	0	0	0	0	0	0	0	0	0	0	0	0	0	0	0
1960	0	0	0	0	0	0	0	0	0	0	0	0	0	0	0	0	0	0	0	0	0	0	0	0	0	0	0	0	0	0	0	0	0
1961	0	0	0	0	0	0	0	0	0	0	0	0	0	0	0	0	0	0	0	0	0	0	0	0	0	0	0	0	0	0	0	0	0
1962	0	0	0	0	0	0	0	0	0	0	0	0	0	0	0	0	0	0	0	0	0	0	0	0	0	0	0	0	0	0	0	0	0
1963	0	0	0	0	0	0	0	0	0	0	0	0	0	0	0	0	0	0	0	0	0	0	0	0	0	0	0	0	0	0	0	0	0
1964	0	0	0	0	0	0	0	0	0	0	0	0	0	0	0	0	0	0	0	0	0	0	0	0	0	0	0	0	0	0	0	0	0
1965	0	0	0	0	0	0	0	0	0	0	0	0	0	0	0	0	0	0	0	0	0	0	0	0	0	0	0	0	0	0	0	0	0
1966	0	0	0	0	0	0	0	0	0	0	0	0	0	0	0	0	0	0	0	0	0	0	0	0	0	0	0	0	0	0	0	0	0
1967	0	0	0	0	0	0	0	0	0	0	0	0	0	0	0	0	0	0	0	0	0	0	0	0	0	0	0	0	0	0	0	0	0
1968	0	0	0	0	0	0	0	0	0	0	0	0	0	0	0	0	0	0	0	0	0	0	0	0	0	0	0	0	0	0	0	0	0
1969	0	0	0	0	0	0	0	0	0	0	0	0	0	0	0	0	0	0	0	0	0	0	0	0	0	0	0	0	0	0	0	0	0
1970	0	0	0	0	0	0	0	0	0	0	0	0	0	0	0	0	0	0	0	0	0	0	0	0	0	0	0	0	0	0	0	0	0
1971	0	0	0	0	0	0	0	0	0	0	0	0	0	0	0	0	0	0	0	0	0	0	0	0	0	0	0	0	0	0	0	0	0
1972	0	0	0	0	0	0	0	0	0	0	0	0	0	0	0	0	0	0	0	0	0	0	0	0	0	0	0	0	0	0	0	0	0
1973	0	0	0	0	0	0	0	0	0	0	0	0	0	0	0	0	0	0	0	0	0	0	0	0	0	0	0	0	0	0	0	0	0
1974	0	0	0	0	0	0	0	0	0	0	0	0	0	0	0	0	0	0	0	0	0	0	0	0	0	0	0	0	0	0	0	0	0
1975	0	0	0	0	0	0	0	0	0	0	0	0	0	0	0	0	0	0	0	0	0	0	0	0	0	0	0	0	0	0	0	0	0
1976	0	0	0	0	0	0	0	0	0	0	0	0	0	0	0	0	0	0	0	0	0	0	0	0	0	0	0	0	0	0	0	0	0
1977	0	0	0	0	0	0	0	0	0	0	0	0	0	0	0	0	0	0	0	0	0	0	0	0	0	0	0	0	0	0	0	0	0
1978	0	0	0	0	0	0	0	0	0	0	0	0	0	0	0	0	0	0	0	0	0	0	0	0	0	0	0	0	0	0	0	0	0
1979	0	0	0	0	0	0	0	0	0	0	0	0	0	0	0	0	0	0	0	0	0	0	0	0	0	0	0	0	0	0	0	0	0
1980	0	0	0	0	0	0	0	0	0	0	0	0	0	0	0	0	0	0	0	0	0	0	0	0	0	0	0	0	0	0	0	0	0
1981	0	0	0	0	0	0	0	0	0	0	0	0	0	0	0	0	0	0	0	0	0	0	0	0	0	0	0	0	0	0	0	0	0
1982	0	0	0	0	0	0	0	0	0	0	0	0	0	0	0	0	0	0	0	0	0	0	0	0	0	0	0	0	0	0	0	0	0
1983	0	0	0	0	0	0	0	0	0	0	0	0	0	0	0	0	0	0	0	0	0	0	0	0	0	0	0	0	0	0	0	0	0
1984	0	0	0	0	0	0	0	0	0	0	0	0	0	0	0	0	0	0	0	0	0	0	0	0	0	0	0	0	0	0	0	0	0
1985	0	0	0	0	0	0	0	0	0	0	0	0	0	0	0	0	0	0	0	0	0	0	0	0	0	0	0	0	0	0	0	0	0
1986	0	0	0	0	0	0	0	0	0	0	0	0	0	0	0	0	0	0	0	0	0	0	0	0	0	0	0	0	0	0	0	0	0
1987	0	0	0	0	0	0	0	0	0	0	0	0	0	0	0	0	0	0	0	0	0	0	0	0	0	0	0	0	0	0	0	0	0
1988	0	0	0	0	0	0	0	0	0	0	0	0	0	0	0	0	0	0	0	0	0	0	0	0	0	0	0	0	0	0	0	0	0
1989	0	0	0	0	0	0	0	0	0	0	0	0	0	0	0	0	0	0	0	0	0	0	0	0	0	0	0	0	0	0	0	0	0
1990	0	0	0	0	0	0	0	0	0	0	0	0	0	0	0	0	0	0	0	0	0	0	0	0	0	0	0	0	0	0	0	0	0
1991	0	0	0	0	0	0	0	0	0	0	0	0	0	0	0	0	0	0	0	0	0	0	0	0	0	0	0	0	0	0	0	0	0
1992	0	0	0	0	0	0	0	0	0	0	0	0	0	0	0	0	0	0	0	0	0	0	0	0	0	0	0	0	0	0	0	0	0
1993	0	0	0	0	0	0	0	0	0	0	0	0	0	0	0	0	0	0	0	0	0	0	0	0	0	0	0	0	0	0	0	0	0
1994	0	0	0	0	0	0	0	0	0	0	0	0	0	0	0	0	0	0	0	0	0	0	0	0	0	0	0	0	0	0	0	0	0
1995	0	0	0	0	0	0	0	0	0	0	0	0	0	0	0	0	0	0	0	0	0	0	0	0	0	0	0	0	0	0	0	0	0
1996	0	0	0	0	0	0	0	0	0	0	0	0	0	0	0	0	0	0	0	0	0	0	0	0	0	0	0	0	0	0	0	0	0
1997	0	0	0	0	0	0	0	0	0	0	0	0	0	0	0	0	0	0	0	0	0	0	0	0	0	0	0	0	0	0	0	0	0
[truncated: 8,802 more rows]

## Sheet: Figure3d_data
Unnamed: 0	p99BS	CumulativeBS	p99NF	CumulativeNF	p99FF	CumulativeFF
0	4402.52	6.46368	6115.37	8.82918	7019.68	13.0895
1	5039.94	4.58022	6156.97	11.4035	7611.81	6.98921
2	5153.38	5.69958	6310.38	6.84135	7719.19	9.81783
3	5253.39	5.75273	6620.21	5.80984	7794.99	11.0068
4	5599.76	2.32086	6752.52	10.5115	7875.57	8.32463
5	5625.97	4.83296	6873.18	6.50403	7927.37	11.6037
6	5694.13	3.7025	6929.69	5.87222	7996.44	12.3507
7	5732.13	6.79225	6979.12	7.57616	8072.98	11.385
8	5757.44	5.64987	7118.21	6.46938	8158.45	14.8339
9	5811.18	5.25122	7143.63	7.67164	8172.4	7.7815
10	5841.32	4.37216	7148.29	7.39712	8211.27	14.3774
11	5891.1	4.7497	7166.07	5.20954	8223.36	12.9168
12	5957.45	5.38868	7196.05	8.60788	8242.35	10.7067
13	5976.11	4.50583	7204.5	9.46428	8308.14	12.6556
14	6014.42	4.0454	7221.61	9.73595	8315.61	10.0584
15	6038.42	5.22892	7221.75	7.73081	8316.02	10.5982
16	6045.56	3.87999	7333.63	5.62228	8337.26	11.0658
17	6100.6	4.6956	7343.8	8.35159	8436.97	11.4414
18	6164.24	4.83299	7354.46	6.1506	8443.92	11.2106
19	6186.1	5.79349	7360.79	9.12774	8478.26	11.2471
20	6252.64	3.82457	7389.03	4.95584	8502.12	13.0993
21	6258.63	6.24186	7403.12	6.79447	8620.61	13.818
22	6276.5	3.53893	7418.44	12.9302	8636.92	9.30278
23	6278.49	5.31127	7427.27	6.89071	8656.35	8.75005
24	6292.33	5.04855	7457.25	7.52617	8661.91	10.6577
25	6312.58	4.0106	7525.42	8.28136	8665.63	8.90595
26	6326.02	6.08866	7556.74	9.81847	8696.53	11.2805
27	6355.26	2.76766	7559.51	12.0949	8697.31	7.9836
28	6399.29	3.58873	7620.28	9.94208	8743.35	13.1285
29	6568.61	4.74966	7629.57	6.28253	8751.33	9.70057
30	6569.04	3.78247	7630.06	7.45147	8752.88	11.362
31	6625.08	3.76664	7653.55	10.5774	8757.95	12.1092
32	6629.73	6.21556	7656.92	7.83187	8771.08	11.3827
33	6657.99	3.3848	7672.69	5.15367	8775.45	10.9884
34	6680.66	3.33138	7708.04	5.75862	8776.5	10.7192
35	6704.47	3.23534	7719.1	6.88662	8783.59	12.9817
36	6707.87	4.94825	7723.84	11.5271	8797.96	12.4759
37	6764.49	4.63915	7763.07	8.93785	8862.21	11.4615
38	6804.85	4.44031	7772.65	9.77212	8881.58	14.4014
39	6877.04	4.63569	7845.63	8.65393	8899.3	10.4589
40	6902.69	4.68773	7867.95	6.84932	8899.41	11.9797
41	6925.43	8.78508	7901.07	6.33558	8955.89	13.3193
42	6930.13	5.26434	7905.71	7.90351	8963.91	12.3611
43	6938.6	7.21908	7914.98	11.4035	8992.26	12.6278
44	6966.42	3.43041	7950.57	9.25834	8992.55	11.8697
45	6972.34	3.47267	7953.2	6.06793	9000.87	11.3139
46	6983.16	5.28747	7975.21	6.62274	9043.42	10.5657
47	6985.28	3.75449	7995.41	6.40722	9043.58	9.25343
48	6989.17	5.48833	7998.22	8.23945	9052.05	13.895
49	6999.13	3.74597	7998.59	7.65493	9070.43	10.5914
50	7004.75	4.76184	7999.66	11.2089	9071.52	12.11
51	7010.48	3.56526	8002.73	5.31925	9082.97	9.27379
52	7017.11	4.50508	8020.19	7.68676	9096.08	12.8627
53	7051.43	4.96854	8036.54	8.03477	9106.39	9.4748
54	7052.67	3.93335	8039.77	6.42222	9116.41	9.11671
55	7055.26	5.35754	8044.04	8.99391	9163.38	9.65357
56	7071.86	6.18852	8056.47	8.67256	9186.01	10.6283
57	7085.32	4.37102	8065.42	6.66298	9300.54	13.8215
58	7135.63	5.44471	8087.33	8.17284	9326.93	11.3378
59	7157.47	6.18005	8090.99	9.47792	9344.88	10.9008
60	7169.11	4.919	8095.95	9.27018	9365.36	11.3293
61	7179.93	5.22778	8131.17	5.15378	9399.55	12.3571
62	7193.43	3.6975	8151.37	6.49232	9411.07	10.7317
63	7243.3	3.39214	8163.51	9.57894	9412.59	10.4029
64	7256.39	5.17955	8191.16	5.96377	9425.68	12.6991
65	7260.84	6.05724	8221.16	7.59668	9472.25	13.9894
66	7273.71	5.25479	8224.97	8.73609	9501.08	9.82797
67	7277.48	7.68081	8247.64	8.13659	9506.85	14.0482
68	7288.13	5.80924	8335.62	7.05409	9528.44	10.174
69	7333.71	4.03921	8400.99	8.59188	9532.37	12.0834
70	7344.36	4.35732	8435.01	6.72758	9605.59	11.816
71	7345.72	4.53243	8483.32	6.86609	9623.46	11.8315
72	7357.02	4.98858	8483.34	5.80449	9669.59	11.0746
73	7371.28	3.93326	8518.91	5.78249	9704.22	9.62879
74	7380.37	6.13887	8545.98	9.17892	9707.14	12.3439
75	7474.33	5.19324	8588.39	4.52067	9718.53	11.6054
76	7506.73	4.09925	8629.76	10.1684	9718.72	11.0418
77	7525.09	5.2925	8662.71	6.97666	9741.34	10.807
78	7538.83	3.90433	8747.62	9.08392	9741.56	10.133
79	7584.29	6.47338	8770.67	5.11849	9788.99	11.3171
80	7669.11	5.39795	8783.03	5.7298	9805.64	12.9831
81	7728.29	4.09294	8792.18	5.54829	9847.84	13.05
82	7737.5	2.50658	8878.35	8.13516	9885.43	11.5846
83	7795.48	3.64355	8902.45	7.78734	9885.94	10.8474
84	7930.6	3.85303	8920.6	5.60239	9914.03	14.7428
85	7932.07	4.41319	8984.96	11.114	9926.73	12.7697
86	7946.16	4.60406	8991.17	5.01823	9952.63	11.6794
87	7976.8	5.23566	9038.83	8.17382	10034.8	14.6058
88	7992.02	2.77183	9106.57	8.74149	10040.2	9.75611
89	8012.33	2.70104	9114.76	8.2323	10066.4	12.1846
90	8073.93	3.45645	9308.76	6.72053	10067.9	12.3886
91	8111.44	6.66346	9326.88	6.90961	10133.3	10.46
92	8124.81	5.92494	9379.77	5.19936	10142.3	13.5223
93	8128.85	4.48092	9476.71	7.5555	10194.2	13.9779
94	8160.29	4.12655	9871.01	7.55202	10396.3	11.7906
95	8413.75	2.98526	9878.66	9.59673	10520.3	9.83674
96	8821.8	4.02346	10103.9	9.12568	10633.3	13.9174
97	8944.2	5.57205	10205.5	6.91017	10675.1	11.2408
98	9325.84	6.40282	10481.4	9.37604	10858.6	9.45793
99	10248.1	6.03078	10980	8.69534	11723.1	12.9483

## Sheet: Figure4abc
Unnamed: 0	Baseline	Near Future	Far Future
0	31.161	59.4346	82.7235
1	33.2817	59.5756	84.8326
2	33.6008	61.5812	97.2788
3	34.5715	62.6788	102.223
4	34.7964	64.0913	102.499
5	37.0778	64.7528	102.563
6	39.024	66.1862	105.907
7	39.7367	66.2847	106.326
8	39.7918	67.344	107.249
9	39.8998	67.8631	108.263
10	41.3696	68.2753	110.125
11	41.87	69.1213	110.206
12	42.3361	71.7104	110.572
13	43.1201	72.2894	110.918
14	43.9007	72.3698	110.927
15	44.193	73.205	110.934
16	45.4996	73.6798	111.897
17	45.6963	73.769	114.178
18	46.1971	73.848	115.012
19	46.278	75.2666	115.265
20	46.4701	75.528	115.597
21	47.2254	75.6323	115.943
22	47.5526	78.4058	116.457
23	47.9175	79.802	118.263
24	48.1424	80.0303	119.975
25	49.0054	80.3088	120.022
26	49.2909	80.6402	120.375
27	49.3648	83.8534	120.402
28	51.0985	85.9937	120.428
29	51.1465	86.0137	120.628
30	52.026	86.1815	120.801
31	52.8644	87.4678	120.869
32	52.9483	87.6603	120.978
33	53.341	88.4619	121.086
34	54.4138	88.5758	121.319
35	54.7472	88.6094	122.133
36	55.6256	89.1247	122.142
37	55.9165	89.2779	122.951
38	56.347	89.8392	123.313
39	56.3829	90.8757	123.606
40	56.548	91.5211	123.94
41	57.0806	91.9063	124.014
42	57.7302	92.1772	124.017
43	57.802	93.5705	124.99
44	58.9	93.7606	125.114
45	59.1781	94.4495	126.262
46	59.5635	94.5239	126.717
47	60.7401	95.1038	127.695
48	60.9211	95.6509	128.209
49	61.7087	95.6559	129.139
50	61.987	96.0995	129.521
51	62.1083	96.527	129.588
52	62.3535	96.5827	129.595
53	62.3588	96.6877	130.545
54	63.5883	97.3746	131.238
55	63.7411	97.3792	131.715
56	64.014	97.3867	131.717
57	64.2541	98.218	132.028
58	65.2712	98.3996	132.155
59	65.3028	98.5878	132.453
60	65.4112	99.5474	133.063
61	65.5577	99.656	133.065
62	65.6126	100.284	133.379
63	65.6767	102.605	133.392
64	65.7062	102.789	133.536
65	65.7957	104.399	134.176
66	66.6291	105.371	134.319
67	66.6746	105.559	134.865
68	67.3161	106.869	135.229
69	67.6	108.434	136.278
70	67.7655	108.598	136.975
71	67.9487	110.331	138.22
72	68.1028	110.355	138.412
73	68.1469	110.677	139.489
74	68.1747	110.856	139.707
75	68.2971	111.708	139.886
76	68.8565	112.724	139.923
77	69.5286	113.088	140.57
78	69.8464	114.139	141.027
79	71.2872	114.495	142.236
80	71.3431	115.68	142.614
81	71.7074	116.274	142.955
82	72.1374	117.536	143.125
83	73.5368	119.337	143.507
84	73.5527	119.538	145.387
85	73.6293	119.703	145.657
86	73.9033	120.063	146.271
87	74.7943	121.083	146.421
88	75.4357	121.501	146.518
89	75.698	122.052	146.861
90	79.1894	122.81	147.113
91	80.0003	124.793	147.131
92	80.6501	125.093	147.328
93	82.0861	125.711	150.991
94	85.593	131.309	151.526
95	85.6415	137.267	152.142
96	90.0417	137.812	152.288
97	90.554	138.759	153.103
98	93.142	142.293	153.236
99	100.482	148.65	157.825

## Sheet: Figure4def
Unnamed: 0	Baseline	Baseline.1	Baseline.2	Baseline.3	Baseline.4	Baseline.5	Baseline.6	Baseline.7	Baseline.8	Baseline.9	Baseline.10	Baseline.11	Near Future	Near Future.1	Near Future.2	Near Future.3	Near Future.4	Near Future.5	Near Future.6	Near Future.7	Near Future.8	Near Future.9	Near Future.10	Near Future.11	Far Future	Far Future.1	Far Future.2	Far Future.3	Far Future.4	Far Future.5	Far Future.6	Far Future.7	Far Future.8	Far Future.9	Far Future.10	Far Future.11
	1	2	3	4	5	6	7	8	9	10	11	12	1	2	3	4	5	6	7	8	9	10	11	12	1	2	3	4	5	6	7	8	9	10	11	12
0	0	0	0	0	0	0	0	1167.87	2.35835e+07	10917.3	0	0	0	0	0	0	0	0	0	1169.09	30496.4	0	0	0	0	0	0	0	0	0	0	1.10473e+07	5.30241e+07	5.98463e+07	3.87102e+07	3.74496e+06
1	0	0	0	0	0	0	0	0	0	0	0	0	0	0	0	0	145726	2.71381e+06	5.12833e+07	5.32803e+07	7.34965e+07	4.4078e+07	4.3892e+07	7.5405e+06	0	0	0	0	0	627509	1.95363e+07	1.09845e+07	5.19841e+07	9.18403e+06	7332.46	0
2	0	0	0	0	0	0	0	0	0	0	0	7592.37	0	0	0	0	0	783728	2.32152e+07	3.64787e+07	3.44883e+07	3.20682e+06	0	0	0	0	0	0	0	0	4.8504e+06	6.21803e+06	2.40525e+07	2.55934e+06	7332.26	0
3	0	0	0	0	0	1.25212e+06	1.36033e+07	6.1886e+07	6.75356e+07	1.42687e+07	2.63742e+06	0	0	0	0	0	0	629957	2.39917e+07	6.36167e+07	6.68262e+07	3.42719e+07	1.38481e+06	0	0	0	0	0	0	659905	3.99802e+07	2.11571e+07	7.29904e+07	6.61372e+07	2.08349e+07	704232
4	0	0	0	0	0	627390	1.94399e+07	1.1754e+08	5.47532e+06	0	0	0	0	0	0	0	0	1.54189e+06	5.26355e+07	5.27119e+07	6.52264e+07	9.34924e+07	782662	7592.16	0	0	0	0	0	0	7005.64	8.48422e+06	4.31285e+07	4.14689e+07	662730	0
5	0	0	0	0	0	0	0	0	4.41795e+06	1.35115e+07	7331.63	0	0	0	0	0	0	0	4.94256e+06	5.20244e+07	7.54098e+07	1.34786e+07	662353	7589.06	0	0	0	0	0	2309.43	2.33568e+07	6.40321e+07	6.9745e+07	9.83408e+07	1.94916e+07	0
6	0	0	0	0	0	3.84127e+06	3.72143e+07	4.30284e+07	8.82706e+06	0	0	0	0	0	0	0	0	0	0	0	1.90592e+06	4.05593e+07	1.55335e+07	0	0	0	0	0	0	8964.1	9.73415e+06	2.85893e+07	6.45959e+07	1.69422e+07	1218.19	0
7	0	0	0	0	0	0	0	7043.56	0	0	0	0	0	0	0	0	0	0	3.67735e+06	1.78112e+07	2.65925e+07	3.25552e+06	0	0	121407	0	0	0	0	15137.2	9.65657e+06	2.35368e+07	3.66127e+07	1.0152e+08	4.1229e+07	1.76753e+07
8	0	0	0	0	0	8959.32	1.27299e+07	5.61212e+07	3.5154e+07	6.57087e+07	2.62346e+07	3.02791e+06	0	0	0	0	0	0	0	7022.03	2.45853e+06	1.73901e+07	0	0	0	0	0	0	0	0	0	0	4.3853e+06	3.9689e+06	1218.67	0
9	0	0	0	15504.6	636328	9.3063e+06	7.69001e+07	1.20475e+08	9.80562e+07	5.5226e+07	6.93806e+06	0	0	0	0	0	0	0	7000.53	24571.2	0	0	0	0	0	0	0	0	0	0	0	1.90893e+06	2.71964e+07	2.27819e+07	0	0
10	0	0	0	0	0	0	9.14454e+06	4.17511e+07	7.70286e+07	4.66091e+07	772673	48778.6	0	0	0	0	0	0	0	681543	2.22726e+07	2.54587e+07	0	0	0	0	0	0	0	0	6988.88	2.68056e+07	2.53293e+07	26767.8	0	0
11	0	0	0	0	0	0	0	0	0	0	0	0	0	0	0	0	0	0	627797	2.53925e+07	5.99906e+07	3.14472e+07	0	0	0	0	0	0	0	0	3.06019e+06	4.61195e+07	8.73746e+07	7.99966e+07	3.01863e+07	4.11042e+06
12	0	0	0	0	3.10346e+06	3.39293e+07	6.23871e+07	8.93627e+07	6.59676e+07	3.46734e+07	1.76134e+07	0	0	0	0	0	179978	6.63558e+07	6.82895e+07	5.41416e+07	9.30771e+07	6.58902e+07	4.36487e+06	3.42452e+06	0	0	0	0	0	0	0	7.46617e+06	3.20779e+07	2.90024e+07	7.61813e+06	8.06847e+06
13	10987.4	0	0	0	0	1.18576e+07	3.1952e+07	7.91102e+07	7.85422e+07	4.86263e+07	1.17072e+07	0	0	0	0	0	0	0	0	0	2.46389e+06	0	10938	0	0	0	0	0	0	0	0	7.96384e+06	2.27941e+07	0	0	0
14	0	0	0	0	0	0	0	0	0	0	0	0	0	0	0	0	0	0	7.91171e+06	3.01998e+07	8.05782e+07	4.45021e+07	0	0	0	0	0	0	0	0	17497.9	2.38459e+07	2.04816e+07	5.0362e+07	67782.4	0
15	0	0	0	0	0	0	1.26711e+06	1.50363e+07	1.6186e+07	658022	0	0	0	0	0	0	0	0	6.72589e+06	1.18801e+07	5.35862e+07	3.62142e+07	721436	0	0	0	0	0	0	1.25684e+06	1.03632e+07	3.21649e+07	3.63067e+07	8.06988e+07	5.13328e+06	62438.6
16	0	0	0	0	0	25199.5	639662	5.83798e+07	6.85039e+07	3.20298e+06	0	0	0	0	0	0	0	0	0	7060.96	0	17054.3	0	0	0	0	0	0	0	0	2.61952e+07	1.08371e+07	8.28242e+07	7.25828e+07	1.15197e+07	0
17	0	0	0	0	0	8966.79	2.42266e+06	4.46746e+06	17524.7	0	0	0	0	0	0	0	0	0	0	0	0	0	0	0	0	0	0	0	0	0	2.68297e+07	3.43432e+07	7.37841e+07	5.90577e+07	1.21706e+07	0
18	0	0	0	0	0	0	0	0	0	0	0	0	0	0	0	0	0	0	0	1.3678e+07	4.24677e+07	1.80722e+07	74460.5	3810.99	0	0	0	0	0	0	18536.5	6.05163e+07	5.7381e+07	7.14242e+07	2.20634e+07	1.29578e+07
19	0	0	0	0	0	0	0	0	0	0	0	0	0	0	0	0	0	0	1.88389e+06	3.90427e+07	3.59914e+07	1.22029e+07	761852	11283.5	0	0	0	0	0	0	0	7058.06	1.5062e+07	3.80744e+07	1.7641e+07	1.8171e+07
20	0	0	0	0	0	0	0	0	1.90453e+06	0	0	0	0	0	0	0	0	0	6.01712e+06	1.73366e+07	9.97344e+07	3.44937e+07	1.42027e+07	785838	0	0	0	0	0	0	1.34588e+07	8.18026e+06	5.15283e+07	5.2517e+07	767204	724258
21	0	0	0	0	0	0	0	1169.86	1.59809e+07	3.56623e+07	1.15582e+07	0	0	0	0	0	0	5.51722e+06	5.01264e+07	4.16522e+07	0	0	3688.79	0	0	0	0	0	0	0	3.67571e+06	4.0173e+07	6.81523e+07	8.41419e+07	2.24065e+07	2.64683e+06
22	0	0	0	0	0	0	17494.9	2.01412e+07	5.84023e+07	1.76628e+07	0	0	0	0	0	0	0	0	0	638506	1.53261e+07	2.22444e+07	2.21876e+07	0	0	0	0	0	9112.73	1.06147e+06	3.69065e+06	4.52025e+07	8.13875e+07	6.69374e+07	9.5278e+06	0
23	0	0	0	0	0	0	0	1.62817e+07	4.79064e+07	2.55464e+06	0	0	0	0	0	0	0	0	2.42391e+06	9.91455e+06	2.99216e+07	2.28477e+07	3.99117e+06	0	0	0	0	0	15366.8	641123	5.23205e+07	5.15631e+07	6.04537e+07	4.08213e+07	128539	0
24	0	0	0	0	0	0	2.36199e+07	9.42665e+06	39755.1	663505	0	0	0	0	0	0	0	0	0	0	2.46816e+06	3664.77	0	0	0	0	0	0	0	0	10488	1.93489e+07	8.36225e+07	5.04195e+07	1.44048e+07	4.2117e+06
25	0	0	0	0	0	0	0	0	0	0	0	0	0	0	0	0	0	1.27882e+06	1.05145e+07	6.31373e+07	7.5996e+07	4.84261e+07	2.64065e+07	1.48047e+06	733583	0	0	0	0	7.89895e+06	2.8983e+07	5.14098e+07	7.76356e+07	9.68996e+07	1.49124e+07	1.51072e+06
26	0	0	0	0	0	0	30168.7	4.73666e+07	7.17771e+07	2.56603e+06	0	0	0	0	0	0	0	0	0	1.10749e+07	0	8457.15	0	0	0	0	0	17862.1	7060.13	2.00232e+07	4.8049e+07	8.42142e+07	5.67743e+07	3.94569e+07	3.23563e+07	208142
27	0	0	0	0	0	0	0	0	0	0	0	0	0	0	0	0	0	0	1.25447e+06	3.10815e+07	0	2.54238e+06	3691.85	0	0	0	0	0	0	30172	3.32147e+07	5.3826e+07	4.32687e+07	8.92035e+07	2.23489e+06	27956.1
28	0	0	0	0	0	1155.12	1.12364e+07	4.99713e+06	0	0	0	0	0	0	0	0	0	0	0	39774.6	5.11527e+07	2.106e+07	729527	0	0	0	0	0	0	0	0	0	0	0	0	0
29	0	0	0	0	0	0	0	0	0	0	0	0	0	0	0	0	0	628077	1.90204e+07	5.13007e+07	7036.11	0	0	0	60630.1	0	0	0	0	8962.01	1.73947e+07	1.78434e+07	8.11182e+07	7.01247e+07	2.66974e+07	9.96157e+06
30	0	0	0	0	0	0	626960	633153	8.0303e+06	1.57295e+07	733193	752109	0	0	0	0	0	0	3505.37	3.34692e+07	6.71829e+07	8.19836e+07	12149.4	0	0	0	0	0	0	0	0	9.22188e+06	2.08384e+07	6.17369e+07	0	0
31	0	0	0	0	0	0	0	0	0	0	0	0	726978	0	0	0	0	1.58483e+07	6.38645e+07	1.05164e+08	6.76955e+07	2.11141e+07	2.22899e+06	1.48085e+07	3.56369e+06	0	0	0	0	0	2.431e+06	2.47269e+07	7.12677e+07	7.02895e+07	4.03902e+07	1.68513e+07
32	0	0	0	0	0	0	0	0	0	0	0	0	0	0	0	0	0	15137.2	2.76125e+07	2.72954e+06	637621	0	0	0	0	0	0	0	0	626233	2.70309e+07	3.8592e+07	4.69128e+07	5.66679e+07	1.05512e+07	3813.34
33	0	0	0	0	0	0	0	0	3.0957e+06	0	0	0	0	0	0	0	0	0	0	2.04171e+07	3.56448e+07	0	3692.26	0	765083	0	0	0	0	3.09972e+06	3.80564e+07	3.77801e+07	9.26226e+07	7.66224e+07	2.21907e+07	2.46331e+07
34	0	0	0	0	0	0	0	0	1.50993e+07	1.93212e+07	0	0	0	0	0	0	0	768982	4.82396e+06	0	650535	0	0	0	0	0	0	0	0	0	0	2.03145e+07	4.10248e+07	6.60811e+07	0	0
35	0	0	0	0	0	0	45224.6	635799	0	0	0	0	0	0	0	0	0	0	0	0	0	15845.2	0	0	0	0	0	0	0	0	1.2759e+07	1.68138e+07	5.57624e+07	4.05998e+07	673745	0
36	0	0	0	0	1.30082e+06	4.09507e+07	3.16408e+07	3.88295e+07	2.52013e+06	3.85309e+06	63978.7	0	733712	0	0	0	0	144193	5.86071e+07	5.08692e+07	6.32642e+07	3.70085e+07	8.01546e+06	776331	0	0	0	0	0	4.30313e+06	3.39232e+07	4.22338e+07	8.50574e+07	5.24929e+07	2.17805e+07	7.01756e+06
37	0	0	0	0	0	0	6.0697e+06	3.70467e+07	5.50854e+07	5.06366e+06	662510	0	0	0	0	0	0	0	0	0	0	0	0	0	0	0	0	0	9112.13	8.67776e+06	2.21839e+07	6.39869e+07	7.93358e+07	8.90225e+07	3.00729e+07	1.02045e+07
38	0	0	0	0	0	3.09722e+06	0	0	0	0	0	0	0	0	0	0	0	0	0	1.27316e+06	4.51513e+07	2.81845e+07	3.20037e+07	15047.3	0	0	0	0	0	0	1.41909e+07	1.41993e+07	3.52456e+07	5.08328e+06	2.55363e+06	0
39	0	0	0	0	0	0	6.08643e+06	2.49092e+07	2.8952e+07	1.23853e+07	0	0	0	0	0	0	0	0	0	1.1903e+07	0	0	0	0	0	0	0	0	0	0	0	0	1.9215e+06	1.98975e+06	7287.32	0
40	0	0	0	0	0	0	20824.4	3.86147e+07	6.60219e+07	5.40518e+07	1.52002e+06	0	0	0	0	0	0	0	0	0	692263	1.41687e+07	0	0	0	0	0	0	0	0	0	0	2.82282e+07	5.87126e+07	4.57078e+06	3.33838e+06
41	0	0	0	0	0	0	0	0	0	0	0	0	0	0	0	0	0	1.06356e+07	1.39403e+07	7.8871e+07	5.49229e+07	2.4887e+07	1.09441e+07	0	0	0	0	0	0	627411	20977.1	1.02276e+07	4.84151e+07	5.08682e+07	0	0
42	0	0	0	0	0	0	0	0	0	0	0	0	0	0	0	0	0	1154.9	3.05201e+06	2.77725e+06	2.79394e+07	7.07574e+07	9.23907e+06	0	0	0	0	0	0	0	10080.2	3.14014e+06	4.53719e+07	7.65141e+07	688211	1.48393e+06
43	0	0	0	0	0	0	0	638486	3.14729e+07	3.55192e+07	9.35062e+06	6.91936e+06	0	0	0	0	0	0	0	0	0	0	0	0	0	0	0	0	0	143988	2.30841e+07	1.1222e+07	3.15203e+06	3.6769e+07	748034	0
44	0	0	0	0	0	0	0	1169.98	636818	5.90748e+06	1217.93	0	0	0	0	0	0	0	0	0	1.90156e+07	2.14779e+07	2.5606e+06	0	0	0	0	0	0	0	3.03109e+06	3.16672e+07	4.97469e+07	1.79875e+07	0	0
45	0	0	0	0	0	1.25215e+06	4.36092e+07	6.48513e+07	6.96382e+07	4.89779e+07	687571	0	0	0	0	0	0	0	0	0	659406	1.24545e+07	0	0	0	0	0	0	0	0	2.41668e+06	1.38662e+07	6.02163e+07	5.34086e+07	5.29571e+06	3.37663e+06
46	0	0	0	0	0	1153.76	2.58101e+07	6.51024e+07	4.82361e+07	3.87275e+06	3.60378e+06	750534	0	0	0	0	0	0	0	1.37193e+07	6.22479e+07	3.68364e+07	1.49059e+07	5.10175e+06	0	0	0	0	0	0	1.95625e+07	2.22375e+07	2.11842e+07	1.07222e+08	2.72141e+07	0
47	0	0	0	0	0	0	0	0	3.10535e+06	1.49979e+07	0	0	0	0	0	0	0	0	0	0	3.1355e+06	4.65582e+06	10933.7	0	0	0	0	0	0	0	0	9.79567e+06	4.6813e+07	7.69606e+07	745796	0
48	0	0	0	0	0	0	0	1.81934e+07	2.2377e+07	1207.36	32754.1	0	0	0	0	0	0	0	0	0	0	0	0	0	0	0	0	0	0	0	2.43633e+06	1.31182e+07	3.83354e+07	5.98229e+07	9476.25	0
49	0	0	0	0	0	0	0	0	3.17518e+06	0	0	0	0	0	0	0	0	630419	4.86295e+07	4.69007e+07	5.22382e+07	7.85594e+07	8.27311e+06	3.40382e+06	0	0	0	0	0	0	9274.17	2.93511e+07	1.45527e+07	0	0	0
50	0	0	0	0	0	0	0	0	2.99135e+07	0	0	0	0	0	0	0	0	0	0	16147.9	0	2.54186e+06	0	0	0	0	0	0	0	3.14715e+06	1.0332e+07	3.21028e+07	4.932e+06	2.32162e+07	0	0
51	0	0	0	0	0	0	0	1.30342e+06	2.21236e+07	7299.61	0	0	0	0	0	0	0	0	1.22956e+07	6.3693e+07	6.06734e+07	1.4702e+07	41299.9	0	0	0	0	0	0	0	3497.81	3.13571e+06	6.67567e+07	3.20319e+07	15961	0
52	0	0	0	0	638895	0	1.47315e+07	635104	2.01399e+07	3.10282e+07	7325.01	0	0	0	0	0	0	0	0	1.94539e+06	2.24288e+07	2.55047e+06	0	0	0	0	0	0	0	0	0	0	0	0	0	0
53	0	0	0	0	0	0	1.58179e+07	3.38752e+07	6.00134e+07	1.16547e+07	0	0	0	0	0	0	0	0	0	0	6.25761e+06	2.20572e+07	16864.3	0	0	0	0	0	0	0	0	1.92098e+06	3.45049e+07	3.793e+07	5.84231e+06	0
54	0	0	0	0	0	631827	4.08454e+07	6.33947e+07	7.80929e+07	7.4229e+07	1.6159e+07	1.47077e+06	0	0	0	0	0	0	0	0	0	0	0	0	0	0	0	0	0	0	0	1.0378e+07	2.51042e+07	4.05232e+07	5.31608e+06	0
55	0	0	0	0	0	767235	3.03766e+06	5.39493e+07	6.59989e+07	1.30588e+07	131437	724276	0	0	0	0	0	0	0	3547.98	2.7012e+07	6.44114e+07	1.64972e+06	0	0	0	0	0	0	627509	1.2338e+07	3.06406e+07	6.14179e+07	7.99138e+07	5.16296e+07	2.22243e+06
56	0	0	0	0	0	0	7001.04	0	1.84364e+07	7.61875e+06	0	0	0	0	0	0	0	0	0	9.4861e+06	1.27283e+06	0	0	0	0	0	0	0	0	0	1.03054e+07	16490	3.12467e+06	4.67073e+07	70824.5	0
57	0	0	0	0	0	0	0	0	0	0	0	0	0	0	0	0	0	0	2.2889e+07	3.07979e+06	0	0	0	0	0	0	0	0	0	1154.42	7.25966e+06	3.36865e+07	8.06619e+07	6.90559e+07	6.22713e+06	0
58	0	0	0	0	0	0	2.42465e+06	9.86003e+06	4.84971e+06	2.70199e+06	0	0	0	0	0	0	0	0	0	15330.5	3.76015e+06	3.30144e+06	4.14469e+06	724258	1105.47	0	0	0	0	803715	2.53863e+07	2.17837e+07	4.91345e+07	4.50193e+07	64261	3.34726e+06
59	0	0	0	0	0	0	0	1.28659e+06	8.03202e+06	0	0	0	0	0	0	0	15365.4	1.29768e+06	5.87787e+07	3.8336e+07	6.30761e+07	5.89867e+07	3.16342e+07	0	0	0	0	0	636994	630380	2.44746e+07	5.95321e+07	8.27159e+07	3.06002e+07	110588	0
60	0	0	0	0	0	0	0	0	0	0	0	0	705176	0	0	0	0	0	4.83988e+06	1.76251e+07	5.00433e+07	3.65717e+07	2.66659e+07	6.45064e+06	0	0	0	0	0	0	0	1.29139e+06	4.98183e+07	7.51527e+07	1.7054e+06	7592.58
61	0	0	0	0	0	32494	4.0866e+07	7.37538e+07	7.85629e+07	4.35147e+07	1.60504e+07	4.10493e+06	0	0	0	0	0	0	17495.3	635164	2.1719e+07	4.32778e+07	1.01062e+07	0	0	0	0	0	638425	2.1788e+06	6.14921e+07	2.36796e+07	1.6091e+07	0	0	0
62	0	0	0	0	0	4.92633e+06	6.67545e+07	9.46803e+07	8.27322e+07	2.0294e+07	796606	1.48759e+06	0	0	0	0	0	0	1.77777e+07	8.29507e+07	8.39998e+07	3.3305e+07	3691.14	0	3.36532e+06	1100.75	0	0	2.47068e+06	32562.3	656598	2.15244e+07	6.12076e+07	5.94615e+07	1.40724e+07	1.57706e+07
63	0	0	0	0	0	0	3505.58	1.68187e+07	8.36395e+07	4.49941e+07	72527.9	0	0	0	0	0	0	0	0	0	6.8398e+06	2.53486e+06	0	0	0	0	0	0	0	0	4.87985e+06	3.0971e+07	4.69039e+07	5.3005e+07	5.75223e+06	0
64	10988.2	1100.91	0	0	0	0	2.29413e+07	3.58666e+07	1.21292e+07	0	0	0	0	0	0	0	0	0	0	0	642806	0	0	0	0	0	0	0	0	0	10500.6	634427	0	0	0	0
65	0	0	0	0	0	0	630428	2.71105e+07	7.70073e+07	4.59514e+07	15950	0	0	0	0	0	0	0	2.48892e+06	5.4115e+07	7.27429e+07	7.5581e+07	0	0	0	0	0	0	638131	1.40032e+07	2.06077e+07	7.73243e+07	5.67054e+07	5.22621e+07	4.78631e+06	688413
66	0	0	0	0	0	0	0	0	1170.27	5.72316e+06	0	752838	0	0	0	0	0	0	1.58492e+07	9.79757e+07	7.86835e+07	1.01324e+07	0	0	0	0	0	0	0	0	0	4.9915e+06	3.56531e+07	6.65485e+06	2.57146e+06	1.37738e+06
67	0	0	0	0	0	0	2.41122e+06	2.03978e+07	7.01954e+07	3.24021e+07	4.00026e+06	0	0	0	0	0	0	0	0	0	0	0	0	0	0	0	0	0	0	0	0	7060.96	0	8474.78	0	0
68	0	0	0	0	0	0	0	3548.49	3.36504e+07	0	0	0	0	0	0	0	2.46155e+06	2.49518e+07	8.91172e+07	6.7526e+07	6.73811e+07	3.25604e+07	14668.7	0	0	0	0	0	0	0	27971.5	2.35234e+07	7.83783e+07	5.26898e+07	7319.62	0
69	0	0	0	0	0	0	0	9.47518e+06	0	0	0	0	0	0	0	0	0	2.42701e+06	2.82431e+07	7.27267e+07	3.46111e+07	1.40987e+07	6.58572e+06	1134	0	0	0	0	0	0	638573	3.07609e+07	5.09917e+07	4.97692e+07	8.07383e+06	47951.6
70	0	0	0	0	0	0	0	0	1.22537e+07	2.43972e+07	0	0	0	0	0	0	0	0	0	2.45998e+06	0	0	0	0	0	0	0	0	0	0	6.04646e+06	2.86306e+07	4.44826e+07	6.5964e+07	2.92363e+07	1.10435e+06
71	0	0	0	0	0	5.6415e+06	6.80934e+07	5.01058e+07	4.54499e+07	4.5204e+07	5.69171e+06	0	0	0	0	0	0	0	7001.45	0	0	657944	0	0	1.57429e+06	0	0	0	640792	1.4903e+06	2.80229e+07	1.51127e+07	4.5789e+07	9.00528e+07	3.10105e+07	2.1775e+07
72	0	0	0	0	0	0	0	0	0	2.14025e+06	3.65831e+06	111181	0	0	0	0	0	0	4.84569e+06	1.64284e+07	5.97526e+07	9.60289e+06	0	0	5.8537e+06	0	0	0	145849	1.56505e+07	4.75763e+07	1.25079e+07	4.92709e+07	9.24122e+07	5.23082e+07	1.30398e+07
73	0	0	0	0	0	0	0	0	0	0	0	0	0	0	0	0	0	0	0	0	22416.3	3.219e+06	0	0	0	0	0	0	0	0	1.4149e+07	2.29964e+07	4.89594e+07	8.3993e+07	7.79073e+06	0
74	0	0	0	0	0	0	2.4259e+06	1.77029e+07	3.5982e+07	0	7332.05	7591.75	0	0	0	0	0	0	0	0	0	0	0	0	0	0	0	0	0	789104	5.11599e+07	5.41486e+07	7.26623e+07	2.61442e+07	1.90409e+07	761986
75	0	0	0	0	0	0	0	0	0	0	0	0	0	0	0	0	0	0	0	0	0	9.1684e+06	0	0	0	0	0	0	0	1154.46	1.95696e+07	2.46646e+07	4.37175e+07	9.71772e+07	4.35837e+07	22661.2
76	0	0	0	0	0	0	0	0	0	0	0	0	0	0	0	0	0	0	6.872e+06	3.86839e+07	4.86825e+07	8.05552e+07	2.09261e+07	1261.6	0	0	0	0	0	0	1.02287e+07	3.08894e+07	9.37567e+07	7.1603e+07	7.78667e+06	62159
77	0	0	0	0	0	0	0	1.92005e+06	2.45829e+06	0	0	0	0	0	0	0	15379.7	770216	2.1054e+07	636818	1.17096e+07	0	0	0	0	0	0	0	0	0	9.13912e+06	1.94916e+07	3.279e+07	4.0599e+07	0	0
78	0	0	0	0	0	0	1.97651e+07	2.45622e+06	1.30304e+07	0	0	0	0	0	0	0	0	143967	4.91104e+07	3.30999e+07	8.10721e+07	4.01597e+07	1.81014e+07	6.04606e+06	0	0	0	0	0	0	2.54925e+07	1.38777e+07	6.49e+07	4.57927e+07	1.05639e+07	2.66399e+06
79	0	0	0	0	0	0	0	0	0	0	729769	0	0	0	0	0	0	0	9.28138e+06	2.6809e+07	22393.4	1.16224e+07	0	0	0	0	0	0	0	0	0	4.91144e+06	4.31769e+07	6.57688e+07	1.15048e+07	0
80	60789.7	0	0	0	0	0	0	644543	4.78155e+07	7.53143e+07	2.438e+07	1.80855e+07	0	0	0	0	0	628058	3.67912e+06	1.72001e+07	2.69739e+07	2.83051e+07	722200	0	0	0	0	0	0	629193	1.99548e+07	4.44411e+07	4.62134e+07	4.96661e+07	7384.22	0
81	0	0	0	0	0	0	0	0	3.772e+06	5.08413e+06	0	0	0	0	0	0	0	143072	626666	0	0	0	0	0	0	0	0	0	0	0	0	0	0	0	0	0
82	0	0	0	0	0	0	0	1.27686e+06	4.95301e+07	5.9308e+07	2.26067e+07	3396.41	4.78798e+06	7308.85	0	0	1172.19	3.05843e+06	1.50657e+07	1.01332e+08	5.66865e+07	9.75498e+07	3.12379e+07	1.9449e+06	0	0	0	0	0	0	0	636073	4.59186e+07	2.43833e+07	7.93229e+06	0
83	0	0	0	0	0	0	0	0	15354.9	0	0	0	0	0	0	0	0	0	626941	24635.6	1.95985e+06	2.22996e+07	1.0631e+07	0	0	0	0	0	0	0	9.23163e+06	2.94502e+07	6.38499e+07	7.07428e+07	14663.3	0
84	0	0	0	0	0	0	0	0	0	0	0	0	0	0	0	0	0	0	2.42336e+06	6.28678e+07	6.14452e+07	4.18037e+07	749395	0	0	0	0	0	0	0	6990.82	3.27531e+07	5.89459e+07	6.43812e+07	5.68423e+06	3.3663e+06
85	0	0	0	0	3.10383e+06	3.13559e+07	4.67528e+07	2.87717e+07	6.28683e+07	4.6052e+07	2.54862e+06	0	0	0	0	0	0	0	0	0	1.32641e+06	3.61914e+07	0	0	0	0	0	0	0	645692	4.38985e+07	4.68559e+07	8.95444e+07	2.30539e+07	2.68801e+06	0
86	0	0	0	0	0	0	4.27715e+06	6.37809e+07	5.1351e+07	0	0	0	0	0	0	0	0	3.03013e+06	2.54096e+06	2.92811e+07	3.07678e+07	6.89169e+07	9.59521e+06	1.4701e+06	0	0	0	0	0	0	659864	1.69151e+07	6.38563e+07	9.00766e+07	8.66726e+06	1.57755e+06
87	0	0	0	0	0	0	0	1163.99	1.40929e+07	0	0	0	0	0	0	0	0	0	0	1.19322e+07	5.90608e+07	4.92251e+07	9.89021e+06	0	0	0	0	0	0	2.41454e+06	9.64112e+06	5.50253e+07	3.11722e+07	3.51199e+07	2.27729e+06	0
88	0	0	0	0	4.94217e+06	0	1.11058e+07	2.31934e+06	4.38603e+06	725550	0	0	0	0	0	0	0	0	0	2.40377e+07	6.81777e+06	1.33595e+06	2.55639e+06	66234.5	0	0	0	0	0	0	2.44147e+06	4.92235e+06	0	9.18228e+06	0	0
89	0	0	0	0	0	0	7.91116e+06	5.55887e+07	5.25748e+07	2.36549e+07	0	0	0	0	0	0	0	0	16217.8	4.92734e+07	6.54121e+07	5.55097e+07	9.43716e+06	0	0	0	0	0	0	0	0	2.47536e+06	3.77117e+07	3.98633e+07	5.14421e+06	0
90	0	0	0	0	0	0	0	1.67505e+07	2.47673e+07	7333.33	0	0	0	0	0	0	0	0	3.67324e+06	6.57195e+07	7.75168e+07	4.57434e+07	2.59502e+07	15058.7	0	0	0	0	0	0	0	3.1012e+06	2.10267e+07	0	0	0
91	0	0	0	0	0	0	0	5.50633e+06	2.28529e+07	3.70902e+07	5.13793e+06	4.93308e+06	0	0	0	0	0	0	0	0	0	0	0	0	0	0	0	0	0	0	2.4326e+06	9.84972e+06	4.93576e+07	5.8425e+07	1.61417e+07	0
92	0	0	0	0	0	0	1.53857e+07	2.94031e+07	5.60344e+07	4.06051e+07	8.01011e+06	0	0	0	0	0	0	0	0	634505	1.07582e+07	0	0	724205	0	0	0	0	0	9.98215e+06	3.07448e+06	2.75757e+07	4.92162e+07	6.22916e+07	6.8445e+06	2.64624e+06
93	0	0	0	0	0	0	4.0809e+07	6.04136e+07	614070	0	0	0	0	0	0	0	0	0	0	2.25137e+07	1.27487e+06	0	0	0	0	0	0	0	0	0	0	1.29546e+06	4.41462e+07	6.03529e+07	2.8819e+07	74657.6
94	0	0	0	0	0	0	0	0	0	0	0	0	0	0	0	0	0	0	3505.37	0	0	675425	0	0	0	0	0	0	0	0	0	636151	0	0	0	0
95	0	0	0	0	0	0	640246	3.9876e+07	8.26651e+07	2.90794e+07	0	0	0	0	0	0	0	0	3.66339e+06	1.29571e+07	3.88332e+07	7.61415e+07	3.43425e+07	1.58639e+06	0	0	0	0	0	0	31248.1	8.01041e+06	5.15017e+07	2.56859e+07	0	764762
96	0	0	0	0	0	0	644120	6.84079e+06	3.98933e+07	3.46795e+07	10931.8	0	0	0	0	0	0	0	15074.1	652304	2.00736e+07	0	0	0	0	0	0	0	0	147812	1.45448e+07	2.09781e+07	9.30649e+07	6.33874e+07	2.46829e+07	3.51536e+07
97	0	0	0	0	0	0	0	636857	1.43911e+07	2.33633e+07	5.62303e+06	0	0	0	0	0	0	8965.59	1.2711e+06	1.18419e+07	0	2.54245e+06	0	0	0	0	0	0	0	0	5.47622e+06	5.92304e+07	6.69807e+07	1.08095e+08	4.3255e+07	5.04877e+06
98	0	0	0	0	0	0	0	0	0	0	0	0	0	0	0	0	0	1154.68	1.47009e+07	5.62534e+07	3.24756e+07	3.8584e+06	0	0	0	0	0	0	0	0	20971.5	1.92986e+07	2.90768e+07	5.48386e+07	1.67995e+07	703829
99	57115.4	0	0	0	0	0	0	3.15043e+07	7.21624e+07	2.1057e+07	0	0	0	0	0	0	0	0	1.89461e+07	6.08088e+07	6.77453e+07	3.24738e+07	0	0	0	0	0	0	0	31336.4	7.95152e+06	3.76165e+07	6.902e+07	7.79407e+07	0	0
100	0	0	0	0	0	3.70553e+06	3.04448e+06	5.56275e+07	3.83546e+07	2.87843e+07	8.94779e+06	2266.64	0	0	0	0	0	0	9.65883e+06	2.36296e+07	7.48104e+06	0	0	0	705035	0	0	0	0	1.43236e+06	2.46302e+06	4.48895e+07	0	0	0	0
101	0	0	0	0	0	0	0	0	0	0	0	0	3.30104e+06	737132	0	0	0	31313.8	1.90105e+06	1.19418e+07	0	3.20084e+06	0	0	0	0	0	0	0	0	10472.5	2.22583e+07	5.64788e+07	8.53486e+07	2.56365e+06	0
102	0	0	0	0	0	0	0	0	3.73851e+06	1.75371e+07	8.31544e+06	0	0	0	0	0	0	152200	6.71352e+06	4.1344e+07	3.1513e+07	3.38001e+07	18279.8	0	0	0	0	0	0	1.8812e+06	4.72442e+07	6.10624e+07	8.23289e+07	2.66066e+07	15961.9	0
103	0	0	0	0	0	0	0	0	0	0	0	0	0	0	0	0	0	0	0	0	637406	17040.3	0	0	719673	0	10808.5	3.60717e+07	1.0667e+07	5.1871e+07	6.97694e+07	5.61742e+07	8.05274e+07	8.96368e+07	2.73966e+07	8.34604e+06
104	0	0	0	0	0	15136.7	2.16141e+07	3.79255e+07	6.4551e+07	8.2839e+06	3.73185e+06	0	0	0	0	7135.31	0	7.25392e+06	8.73156e+07	8.91568e+07	4.86123e+07	2.35912e+07	7379.11	0	0	0	0	0	15380.2	2.81978e+06	2.61136e+07	2.85381e+07	7.96746e+07	9.68756e+07	2.54632e+07	2.45078e+07
105	0	0	0	0	0	0	0	0	7.365e+06	12014.6	9481.02	0	0	0	0	0	0	0	3484.02	6.86627e+06	2.42281e+07	3.86891e+06	0	0	0	0	0	0	0	0	0	7043.36	15349.1	668056	15960.5	0
106	0	0	0	0	0	0	0	0	0	0	0	0	0	0	0	0	0	17430.6	2.13503e+07	4.7381e+07	7.84422e+07	5.57549e+07	2.49133e+07	4.81799e+06	0	0	0	0	0	0	625765	2.22918e+07	6.4423e+07	1.4639e+07	2.03143e+07	7566.28
107	0	0	0	0	2.46301e+06	6.23901e+06	6.81456e+07	7.42956e+07	9.60016e+07	7.6264e+07	7.69785e+06	3815.69	0	0	0	0	0	0	0	0	3.73093e+06	674429	0	0	76627.8	0	0	0	0	0	21986.9	5.20623e+07	3.7266e+07	6.73632e+07	1.18974e+07	0
108	0	0	0	0	0	1155.12	5.47426e+06	5.07142e+07	7.93089e+07	2.67136e+07	1.43952e+06	0	0	0	0	0	0	0	0	0	0	0	0	0	0	0	0	0	0	9.30961e+06	2.65955e+07	6.13706e+07	5.45013e+07	9.97037e+07	6.51431e+07	3.93261e+07
109	0	0	0	0	0	0	0	0	0	0	0	0	0	0	0	0	0	0	9.8828e+06	1.43653e+07	0	0	0	0	0	0	0	0	0	0	2.4418e+06	2.17103e+07	8.29209e+07	2.72658e+07	0	0
110	0	0	0	0	0	1.36555e+07	0	0	0	0	0	0	0	0	0	0	0	0	651764	2.77159e+07	8.85543e+07	2.12521e+07	0	0	0	0	0	0	0	0	2.63433e+07	9.89964e+06	9.65934e+07	3.09437e+07	2.85965e+06	0
111	0	0	0	0	2.62992e+06	4.66803e+07	6.0148e+07	3.60239e+07	1.39605e+07	3.38269e+07	9.36028e+06	0	0	0	0	0	0	0	0	8.07178e+06	4.16312e+07	1.77967e+07	5.82554e+06	0	2.57262e+06	0	0	0	0	152116	4.10007e+07	5.9947e+07	7.26497e+07	7.6311e+07	0	0
112	0	0	0	0	0	0	0	672162	640753	0	0	0	0	0	0	0	0	0	0	0	0	0	0	0	1.44423e+07	2.55687e+06	10828.9	5.62753e+06	2.44489e+07	3.72863e+07	4.30302e+06	5.28992e+07	7.02608e+07	5.66837e+07	2.47079e+07	731571
113	0	0	0	0	0	0	0	144961	4.84702e+07	2.85434e+07	673428	0	0	0	0	0	1172.38	8.88426e+06	5.91424e+07	1.00523e+08	1.14306e+08	6.52611e+07	4.24912e+07	0	0	0	0	0	0	0	0	6.17773e+06	4.88512e+07	7.37342e+07	0	3817.02
114	0	0	0	0	0	0	0	9087.36	4.71858e+07	1.30407e+07	0	0	0	0	0	0	2.46329e+06	1.74692e+07	7.84568e+06	0	0	0	0	0	0	0	0	0	0	0	0	0	2.13448e+07	8.17803e+07	6.57034e+06	694713
115	0	0	0	0	638856	0	4.67605e+07	2.59007e+07	3.75053e+06	0	0	0	0	0	0	0	0	0	0	4.37172e+06	1.54705e+07	3.34314e+07	0	0	0	0	0	0	0	0	0	7059.1	2.64836e+07	5.46196e+07	7371.03	0
116	0	0	0	0	0	0	0	0	0	0	0	0	0	0	0	0	0	0	0	0	0	0	0	0	0	0	0	0	0	0	6948.09	1.0459e+07	5.66149e+06	2.56572e+06	0	0
117	0	0	0	0	0	0	0	0	0	0	0	63614.9	0	0	0	0	0	0	0	0	0	0	0	0	0	0	0	0	0	0	0	5.53913e+06	6.66363e+06	7.52653e+07	1.5286e+07	0
118	0	0	0	0	0	0	1.8479e+07	2.17581e+07	6.25627e+07	5.75535e+07	181874	0	736665	0	0	0	0	0	0	0	0	0	0	0	733288	0	0	0	1172.01	2.5399e+06	3.17625e+07	5.64007e+07	5.67962e+07	4.96223e+07	5.58105e+06	0
119	0	0	0	0	0	1.36757e+07	5.86733e+07	4.77043e+07	2.72341e+07	9.64192e+06	0	0	0	0	0	0	0	0	3.64927e+06	5.55282e+06	0	0	0	0	1.45949e+06	792418	2.49915e+06	0	0	1154.9	2.45604e+06	2.25893e+07	3.73441e+07	4.82265e+07	2.35778e+06	7.962e+06
120	0	0	0	0	0	0	0	0	1.68922e+07	1.01067e+07	0	0	0	0	0	0	0	0	0	0	2.46515e+06	2.56699e+06	0	0	0	0	0	0	0	0	0	2.47021e+06	3.08174e+07	8.54983e+07	6.47162e+06	2.66707e+06
121	0	0	0	0	0	0	0	0	0	0	0	0	0	0	0	0	0	0	6.30459e+06	8.28363e+07	6.87076e+07	5.83605e+07	730174	0	0	0	0	0	8.8613e+06	2.89402e+07	3.31248e+07	6.34604e+07	6.85178e+07	1.76965e+07	0	0
122	0	0	0	0	0	0	0	2.47958e+06	8.60017e+06	3.84574e+06	822945	0	0	0	0	0	0	0	0	3.10599e+06	3.76147e+06	656768	0	0	0	0	0	0	0	625390	7.90924e+06	2.87559e+07	2.31994e+07	2.67234e+07	0	0
123	0	0	0	0	0	3.03457e+06	2.92016e+07	1.52453e+07	15350.6	2.59546e+06	71430.9	0	0	0	0	0	0	0	2.42221e+06	0	652910	0	0	0	0	0	0	0	0	143195	0	1.04297e+07	3.9317e+07	4.51767e+06	5.1284e+06	0
124	0	0	0	0	0	0	0	0	0	0	0	0	0	0	0	0	0	0	0	0	0	1.07764e+07	0	0	0	0	0	0	0	1149.21	8.47002e+06	1.86625e+07	8.62335e+07	6.01235e+07	7.3182e+06	2.65887e+06
125	0	0	0	0	0	0	0	2336.81	2.98387e+07	3.79601e+07	905537	0	0	0	0	0	0	2.50563e+06	1.4135e+07	6.19593e+07	7.83565e+07	7.19553e+07	8.0016e+06	1.50988e+06	0	0	0	0	0	8966.19	0	0	1.30343e+06	4.62818e+07	2.46426e+06	0
126	0	0	0	0	0	0	0	0	0	0	0	0	0	0	0	0	0	0	9.94265e+06	4.73927e+07	5.72573e+07	1.17009e+07	0	0	7367.05	0	0	0	0	0	3.68153e+06	1.77764e+07	5.12263e+07	5.22116e+07	2.59165e+06	7592.16
127	0	0	0	0	0	0	1.39093e+06	4.61216e+07	7.78595e+07	5.39792e+07	846691	62476.5	0	0	0	0	0	0	0	1.96713e+06	5.23819e+07	5.74668e+06	0	0	0	0	0	7137.38	9116.91	0	2.43035e+06	5.58601e+06	4.4792e+07	2.67908e+07	0	0
128	0	0	0	0	0	8965.29	1.95345e+07	9.76839e+06	6.65007e+06	0	0	0	0	0	0	0	0	0	0	0	0	0	0	0	0	0	0	0	0	0	0	3.70283e+06	7.41897e+06	0	0	0
129	0	0	0	0	0	0	0	0	0	0	0	0	0	0	0	0	0	0	0	0	7069.04	0	0	0	61737.2	10945.3	0	2.49633e+06	1171.49	683452	1.23998e+07	1.8386e+07	5.63424e+07	5.14809e+07	1.47942e+07	752385
130	0	0	0	0	0	0	0	0	1169.46	15845.7	0	0	0	0	0	0	0	0	0	1.61582e+07	3.13071e+07	6.02862e+07	60178.4	0	0	0	0	0	0	0	19704.7	1.5498e+07	8.17006e+07	1.61035e+07	0	0
131	0	0	0	0	0	0	1.33476e+07	5.42212e+07	3.85017e+07	54949.4	0	0	6.59947e+06	0	0	0	0	7.40857e+06	2.76495e+07	9.49071e+07	5.65342e+07	3.03833e+07	1.47226e+06	0	0	0	0	4.9834e+06	6.45572e+06	5.33594e+07	3.62698e+07	2.94231e+07	3.17653e+07	3.61429e+07	18312.2	0
132	0	0	0	0	661256	5.18246e+06	1.78858e+07	4.52696e+07	5.783e+07	5.64816e+07	1.75207e+07	0	0	0	0	0	0	0	3505.07	6.13704e+06	7.07307e+07	3.39642e+07	0	0	0	0	0	0	0	629018	20983.8	2.43986e+07	7.58469e+07	3.4231e+07	759640	0
133	0	0	0	0	0	0	0	0	0	0	0	0	1105.58	0	0	0	0	626411	1.60728e+07	5.67872e+07	7.67002e+07	5.32281e+07	3.22271e+07	2.23471e+06	0	0	0	0	0	0	0	14116.3	30652.3	7.08454e+06	4.02835e+06	690611
134	0	0	0	0	0	0	0	0	145726	0	0	0	0	0	0	0	0	0	6.85223e+06	2.9741e+07	6.0097e+07	8.15525e+07	4.26666e+07	1.99579e+07	0	0	0	643559	786090	3.4859e+07	1.58515e+07	1.68414e+07	5.79652e+07	7.05822e+07	8.41406e+06	4.06142e+06
135	0	0	0	0	0	0	0	2.48715e+06	648637	0	0	0	0	0	0	0	0	0	0	4.21152e+07	8.48187e+07	6.35113e+07	3.35074e+06	0	0	0	0	0	0	5.64203e+06	6.65892e+06	3.97556e+07	5.18285e+07	3.87367e+07	781567	9852.3
136	0	0	0	0	0	3.09361e+06	4.4722e+07	5.45513e+07	7.45225e+07	5.68466e+07	2.63615e+06	0	733694	0	0	0	0	0	0	0	0	0	0	0	0	0	0	0	0	0	1.11434e+07	4.46014e+07	17651.8	15788.3	0	0
137	0	0	0	0	0	0	0	1.01302e+07	4.0471e+07	0	0	0	0	0	0	0	0	1.26243e+06	659919	3.30008e+07	2.01673e+07	0	0	0	727782	0	7248.52	22584.9	0	15070.7	3.09621e+06	5.53407e+06	6.55826e+07	8.27727e+07	5.24391e+07	3.63105e+07
138	0	0	0	0	0	634067	1.39515e+07	3.0644e+07	5.61377e+07	1.0666e+07	0	0	0	0	0	0	0	0	0	0	0	0	0	0	0	0	0	0	0	0	0	0	0	0	0	0
139	0	0	0	0	0	30245.2	5.43331e+07	2.28913e+07	1.13221e+07	0	0	0	0	0	0	0	0	0	0	0	0	0	7335.16	0	0	0	0	0	0	0	2.42145e+06	4.9911e+07	7.79243e+07	5.45231e+07	1.72806e+07	5.99617e+06
140	0	0	0	0	0	0	0	0	4.41135e+06	37583.2	0	0	0	0	0	0	0	628234	2.577e+07	6.55807e+07	7.59447e+07	1.21554e+07	0	0	0	0	0	0	0	15135.8	2.43126e+06	3.63971e+07	7.6607e+07	6.69592e+07	5.09765e+07	4.00488e+07
141	0	0	0	0	0	0	626705	0	0	0	0	0	1.46643e+06	0	0	0	0	0	0	16480.1	9104.37	14565.9	9475.06	48778.6	0	0	0	0	0	0	0	28272.3	3.44635e+07	7.87406e+07	2.32397e+07	812022
142	0	0	0	0	0	0	0	0	653215	9.17939e+06	721292	724028	0	0	0	0	0	0	0	0	0	0	0	0	0	0	0	0	0	0	0	15310.9	3.13596e+07	2.23894e+07	91019.5	7591.33
143	1.44224e+06	0	0	0	0	0	0	2.47789e+06	0	0	0	0	0	0	0	0	0	0	0	5.55352e+06	5.32315e+07	3.78554e+07	0	0	0	0	0	0	0	0	0	2.16179e+07	3.77352e+07	6.68207e+07	6.00494e+06	3817.74
144	0	0	0	0	0	0	0	0	0	0	0	0	0	0	0	0	0	0	0	1.27502e+06	6.2412e+06	13069.9	0	0	0	0	0	0	0	1.26888e+06	2.08307e+07	1.81054e+06	5.95601e+07	8.55826e+07	2.35899e+07	7554.26
145	0	0	0	0	0	0	0	0	0	0	0	0	0	0	0	0	0	0	0	9.91183e+06	6.40661e+07	5.99425e+07	1.71979e+07	0	0	60506.9	0	0	0	16292.2	1.03345e+07	2.31024e+07	1.38949e+07	3.95405e+07	0	0
146	0	0	0	0	0	4.30029e+06	4.86914e+07	7.89711e+07	8.66352e+07	5.32648e+07	5.43184e+06	0	0	0	0	0	0	0	1.53646e+07	7.61883e+07	4.25108e+07	660065	677046	1.48679e+06	0	0	0	0	0	0	0	7042.53	2.46669e+06	0	0	0
147	0	0	0	0	0	0	0	2337.66	4.94628e+06	669581	762083	0	0	0	0	0	0	2.51467e+06	2.88976e+07	4.4482e+07	1.10252e+07	2.66163e+06	725192	753151	0	0	0	0	0	0	0	0	0	0	0	0
148	0	0	0	0	0	1.27051e+06	2299.98	0	0	2.55047e+06	3691.04	0	0	0	0	0	0	0	24399	3.09554e+06	4.95848e+06	7.60954e+06	0	0	0	0	0	0	0	6.11881e+06	1.83107e+07	5.51737e+07	4.13042e+07	8.8325e+07	7.61023e+06	5.29433e+06
149	0	0	0	0	0	0	0	3.20826e+06	3.36964e+07	0	0	0	0	0	0	0	0	0	0	0	0	0	0	0	0	0	0	0	0	0	3499.24	0	2.89239e+07	5.95507e+07	2.22375e+07	2.63982e+06
150	0	0	0	0	0	0	4.8491e+06	791346	3.84518e+07	2.8615e+07	2.19471e+07	1.08008e+07	0	0	0	0	0	0	1.46379e+07	8.01191e+07	7.47169e+07	7.96412e+07	1.38895e+07	3.42506e+06	0	0	0	0	2.46765e+06	669955	4.14646e+07	2.43557e+07	7.19458e+07	3.11939e+07	805578	0
151	0	0	0	0	0	0	0	0	0	0	0	0	0	0	0	0	1173.12	3.23292e+07	3.25363e+07	7.79815e+07	6.62532e+07	0	0	0	0	0	0	0	0	0	0	0	1.10652e+07	5.06403e+06	0	0
152	0	0	0	0	0	0	626627	8.05492e+06	0	0	0	0	0	0	0	0	0	0	3.28122e+07	2.71849e+07	4.68147e+07	3.51713e+07	0	0	0	0	0	0	0	0	3491.68	4.82982e+07	9.03303e+07	3.83164e+07	0	0
153	0	0	0	0	0	0	0	3.98128e+07	4.7736e+07	67385.1	1218.63	0	0	0	0	0	0	629643	1.71938e+07	4.71565e+07	1.87005e+07	1.04962e+07	0	0	0	0	0	0	0	30266.3	1.5586e+07	2.57999e+07	3.15045e+07	2.76347e+07	3.92735e+06	0
154	0	1.40363e+06	0	0	0	0	0	0	0	0	0	0	0	0	0	0	0	0	640028	3.09261e+06	3.96243e+07	2.04108e+07	3681.12	0	0	0	0	0	0	0	0	0	7062.2	4.50888e+06	0	0
155	0	0	0	0	0	0	0	0	0	15811.2	0	0	0	0	0	0	0	6.69404e+06	2.56142e+06	5.02739e+07	3.87649e+07	2.44741e+07	2.8934e+06	0	0	0	0	0	0	0	4.8413e+06	3.67929e+07	6.1705e+07	9.88644e+07	1.23533e+07	0
156	0	0	0	0	0	0	0	0	0	0	0	0	0	0	0	0	0	0	146025	1.8897e+07	1.40653e+07	1.41257e+07	128316	735447	0	0	0	0	0	0	18494.5	3.74266e+06	3.27445e+07	4.40576e+07	668463	0
157	0	0	0	0	0	0	1151.02	0	0	0	0	0	0	0	0	0	0	0	8.71767e+06	1166.54	1.05151e+07	1.41731e+07	80135.9	0	0	0	0	0	0	0	0	22232.5	0	0	0	0
158	0	0	0	0	0	0	0	0	0	0	0	0	0	0	0	0	3.10639e+06	0	0	0	0	0	0	0	705123	0	0	2.49389e+06	9113.03	1.39955e+07	4.21142e+07	3.86382e+07	3.00379e+07	3.33553e+07	0	0
159	0	0	0	0	0	0	0	1164.91	1.24434e+07	1.98413e+07	20728.3	0	0	0	0	0	0	0	0	0	0	0	0	0	0	0	0	0	0	0	0	0	0	0	60469	0
160	0	0	0	0	0	642876	0	2.94556e+07	16438.4	0	0	0	2.86395e+06	709180	0	0	0	0	0	0	0	0	0	0	0	0	0	0	0	0	0	9065.28	4.44498e+07	5.06617e+06	0	0
161	0	2201.18	59511.9	0	0	0	6.07445e+06	2.06357e+07	5.85183e+07	3.65875e+07	21669.4	62482.8	0	0	0	0	0	24098.8	0	0	0	0	0	0	0	0	0	0	0	0	1.25274e+06	2.98594e+07	4.48405e+07	1.03984e+08	4.01082e+07	0
162	60784.9	0	0	0	638346	2.06411e+07	5.64741e+07	3508.64	0	0	0	0	0	0	0	0	0	0	0	0	0	0	0	0	4.0538e+06	673476	0	0	0	0	0	7084.32	1.30607e+06	0	0	0
163	0	0	0	0	0	0	3505.68	1169.2	16455.1	3.9822e+07	4.60078e+06	3815.8	0	0	0	0	0	0	0	8.84067e+06	1.77898e+07	0	0	0	0	0	0	0	0	0	0	0	0	0	0	0
164	0	0	0	0	0	0	0	2.56402e+07	3.69783e+07	0	0	0	0	0	0	0	0	8963.8	3.13652e+06	7.63247e+07	7.96224e+07	1.88535e+07	0	2.65111e+06	0	0	0	0	0	0	0	0	0	0	0	0
165	0	0	0	0	0	0	0	9.61639e+06	8.80665e+06	9404.62	10942.3	752893	0	0	0	0	0	0	0	0	0	10915	0	0	0	0	0	0	0	0	0	7058.47	1.27334e+06	1.31506e+07	0	0
166	2.57277e+06	0	0	0	0	0	0	0	0	0	0	0	0	0	0	0	0	0	1148.99	0	0	0	0	0	1224.91	0	0	0	0	0	2.41985e+06	637145	2.46677e+06	0	0	0
167	0	0	0	0	0	624942	4.04127e+07	1.41983e+07	5.353e+07	2.76033e+06	3.27728e+06	0	0	0	0	0	0	0	1.1689e+07	4.22063e+07	5.11124e+07	0	0	0	0	0	0	0	0	144366	2.00343e+07	2.13641e+07	1.66632e+07	8.18262e+07	11021.5	0
168	0	0	0	0	0	0	1.09062e+07	7.56854e+07	6.24239e+07	1.10154e+07	729493	0	0	0	0	0	0	0	0	0	0	0	0	0	0	0	0	0	0	0	0	3.80801e+07	4.48094e+07	7.54909e+07	9.21547e+06	0
169	0	0	0	0	0	0	1.50424e+07	1.61313e+07	3.30781e+07	167748	669488	0	0	0	0	0	0	0	2.64161e+07	7.81982e+07	9.80358e+07	1.24593e+07	0	0	0	0	0	0	0	3.68372e+06	2.43799e+06	5.50062e+07	4.97569e+07	2.83352e+07	34162.8	2.6485e+06
170	0	0	0	0	0	0	0	0	3.55374e+07	2.22766e+07	1.46289e+06	0	0	0	0	0	1.27597e+06	641276	0	7.47271e+06	4.80202e+07	5.87729e+07	1.13399e+07	0	0	0	0	0	0	0	0	685154	5.67911e+07	3.48819e+07	2.55942e+06	0
171	0	0	0	0	0	0	3.6565e+06	2.41991e+07	1.24708e+07	0	0	0	0	0	0	0	0	0	0	0	0	0	0	0	4.6636e+06	0	0	0	0	0	0	1.75136e+07	5.87076e+07	6.03943e+07	5.1175e+06	0
172	0	0	0	0	2.45001e+07	2.42483e+07	0	7058.27	0	0	0	0	0	0	0	0	0	0	1.95386e+07	1.00312e+08	1.02143e+08	5.08448e+07	25752.7	0	12177.8	0	0	0	10291.3	49720.5	2.07231e+07	7.77193e+06	6.15724e+06	3.85471e+06	0	0
173	0	0	0	0	0	0	0	0	2.83604e+07	5.74406e+06	0	0	0	0	0	0	0	8964.1	7.85183e+06	4.46433e+07	2.56949e+06	1.35181e+06	8.01703e+06	0	0	0	0	0	0	0	0	0	3.74168e+06	9.81923e+06	0	0
174	733473	0	0	0	0	0	45236	2.4675e+06	4.06002e+07	6.2526e+07	0	0	0	0	0	0	0	0	1.83621e+07	2.05621e+06	0	0	0	0	60683.8	0	0	0	0	0	3.67335e+06	3.09894e+06	1.84221e+07	2.68703e+07	731356	0
175	0	0	0	0	0	1.24902e+06	2.09723e+07	9.45227e+07	6.1986e+07	3.04679e+07	730250	0	0	0	0	0	0	0	0	0	0	0	0	0	0	0	0	0	0	0	0	4.91213e+06	1.30852e+06	3.16162e+06	13170.3	0
176	0	0	0	0	0	0	0	9.37901e+06	5.28354e+07	4.21501e+07	145529	0	0	0	0	0	0	0	0	0	0	0	0	0	0	0	0	0	0	0	0	18829.1	3.18558e+07	4.92857e+07	0	0
177	0	0	0	0	0	1.29213e+06	2.91587e+07	1.20647e+08	5.68695e+07	5.0897e+07	1.89528e+07	4.14049e+06	0	0	0	0	0	0	0	0	0	0	730580	0	0	0	0	0	0	0	2.42553e+06	1.36112e+07	3.47041e+07	7.38355e+07	6122.07	0
178	0	0	0	0	0	0	0	636778	0	0	0	0	0	0	15654.8	0	1172.86	3.68099e+06	6.35559e+07	4.14429e+07	7.53621e+07	1.97371e+07	1.00048e+07	0	0	0	0	0	0	0	0	0	0	0	0	0
179	0	0	0	0	0	1.36069e+07	1.86741e+07	0	0	3.85724e+06	2.5634e+06	48766.4	0	0	0	0	0	1.5358e+07	7.1955e+07	3.16448e+07	0	0	0	0	0	0	0	0	0	0	0	4.92004e+06	2.99058e+07	7.67947e+07	33609.9	0
180	1.48723e+06	0	0	0	0	639383	3.03332e+07	4.89862e+07	4.50482e+07	1.91718e+07	3.64802e+07	1.16901e+07	0	0	0	0	0	0	1.91384e+06	3.77994e+07	6.84391e+07	5.13603e+07	144000	814751	0	0	0	0	0	0	0	3549.41	1.34736e+07	3.77044e+07	4.08187e+06	3818.25
181	0	0	0	0	0	0	0	0	0	0	0	0	0	0	0	0	0	0	0	0	0	0	0	0	0	0	0	0	0	143212	1.60413e+07	3.24279e+07	7.68164e+07	4.54046e+07	2.66141e+06	0
182	0	0	0	0	0	0	0	636132	1.42308e+07	7.00408e+06	0	0	1.50793e+06	0	0	0	0	0	0	0	669588	747818	731275	0	0	0	0	0	0	0	2.7947e+07	4.70999e+07	4.45262e+07	4.33706e+07	0	0
183	0	0	0	0	0	0	0	0	0	0	0	0	0	0	0	0	0	0	0	0	0	0	0	0	0	0	0	0	0	0	1.10269e+07	2.05214e+07	6.90871e+07	7.77321e+06	903357	0
184	0	0	0	0	0	0	9.30428e+06	3.86729e+07	6.20588e+07	666534	1.43008e+06	0	58573.3	702117	0	0	16538.5	0	22041.1	23506.8	0	0	0	0	0	0	0	0	0	0	0	635877	2.83182e+07	3.7213e+07	3.47632e+06	0
185	0	0	0	0	0	628665	0	3.08117e+06	4.50085e+07	1.95473e+07	1.18501e+07	0	0	0	0	0	0	0	0	1.27859e+06	5.25771e+07	3.27428e+07	61552.6	0	0	0	0	0	0	5.47284e+06	2.51701e+07	5.55291e+07	6.39724e+07	6.22545e+07	3.51478e+06	0
186	0	0	0	0	0	0	0	0	0	0	0	3819.37	733473	0	0	0	0	1.29985e+07	5.69635e+07	1.12887e+07	5.80553e+07	3.72559e+07	6.92655e+06	11284.1	781116	0	0	644010	0	5.81307e+06	3.8841e+07	6.05216e+07	2.05313e+07	3.93555e+07	3.89794e+06	0
187	0	0	0	0	0	0	0	0	0	0	3691.95	0	0	0	0	0	0	0	0	1.01239e+07	3.41857e+07	0	0	0	0	0	0	0	0	0	0	10591	1.17218e+07	4.29438e+07	1.54e+06	0
188	0	0	0	0	0	0	0	0	0	2.14872e+06	2.13903e+06	111172	0	0	0	0	0	0	0	0	0	0	0	0	0	0	0	0	0	1.57134e+06	9.954e+06	2.69295e+07	6.64974e+07	7.38852e+07	3.3625e+07	2.65907e+06
189	0	0	0	0	0	0	0	0	0	0	0	0	0	0	0	0	0	0	3.05836e+06	728746	5.59184e+06	2.54346e+06	730580	0	0	0	0	0	0	0	1.25127e+06	4.33499e+06	7060.96	6.45022e+06	4.75116e+06	0
190	0	0	0	0	0	628058	0	0	0	0	0	0	766011	0	0	0	0	0	2.46084e+06	6.37491e+07	6.70953e+07	7.4637e+07	1.06383e+07	687144	0	0	0	0	0	627528	7.87534e+06	3.54495e+07	4.58438e+07	3.52984e+07	2.07855e+06	0
191	0	0	0	0	0	628077	3.06242e+06	1.68706e+07	4.41147e+07	3.08903e+07	9.40624e+06	0	0	0	0	0	0	0	0	0	0	0	0	0	0	0	0	0	0	0	0	8.68401e+06	7.89295e+07	1.56104e+07	0	0
192	0	0	0	0	0	1154.61	60225.4	1169.86	0	0	0	0	0	0	0	0	0	0	0	0	30655.2	1.48027e+07	0	0	705729	0	0	0	0	16293.8	1.87382e+06	8.87758e+06	1.97697e+07	0	0	0
193	0	0	0	0	0	0	0	0	0	0	0	0	0	0	0	0	0	0	0	0	2.32374e+07	5.8611e+07	2.76266e+07	8.22489e+06	0	0	0	0	0	0	0	0	2.4636e+06	0	0	0
194	0	0	0	0	0	0	0	1.27092e+06	2.43232e+07	4.30132e+07	6.49119e+06	3817.23	0	0	0	0	0	0	0	656909	1.29295e+06	3.29403e+06	0	0	0	0	0	0	0	0	0	0	9.50047e+06	1.75286e+07	0	0
195	0	0	0	0	0	0	0	636876	0	0	0	0	2.24501e+06	0	0	0	0	8967.08	0	0	0	1.17357e+07	1.58228e+06	18871.2	0	0	0	0	0	3.05995e+06	2.02956e+07	3.71936e+07	6.23176e+07	9.95563e+07	3.91483e+07	7569.38
196	0	0	0	0	0	0	0	0	0	0	0	0	0	0	0	0	0	3.17738e+06	5.62654e+07	4.12906e+07	3.77885e+07	5.52645e+07	6.62761e+06	16509.2	0	0	0	0	0	0	3505.58	21205.9	18901.1	0	666278	0
197	0	0	0	0	0	0	0	0	0	0	0	0	0	0	0	0	0	0	0	1.31955e+07	3.11352e+07	1.54708e+07	0	0	0	0	0	0	0	1.57598e+07	6.38592e+07	5.66044e+07	7.07239e+07	6.18663e+07	1216.42	0
198	0	0	0	0	0	18595.3	8.48226e+06	668800	1.14322e+07	1.62268e+07	5.49483e+06	0	0	0	0	0	0	1.27971e+06	1.25164e+06	0	655355	0	0	0	0	0	0	0	0	0	1.20724e+07	5.44425e+07	8.16148e+07	4.60508e+07	51233.4	0
199	0	0	0	0	0	6.09368e+06	3.19634e+07	0	0	0	0	0	0	0	0	58971.8	0	0	3.05038e+06	1.21121e+07	0	0	0	0	0	0	0	0	0	0	6984.9	4.87563e+06	0	2.54193e+06	662588	0
200	976620	0	0	0	0	0	0	0	3.11712e+06	2.44437e+07	4.11541e+06	0	0	0	0	0	0	0	53237.7	1.25672e+07	3.11165e+06	1.33543e+07	0	0	0	0	0	0	0	0	13975.3	3.7514e+07	1.29536e+07	2.67309e+07	0	0
201	0	0	0	0	0	8.70196e+06	2.13696e+07	2.93225e+07	1.1175e+07	0	0	0	0	0	0	0	0	0	1.1101e+07	3.41137e+07	5.77908e+07	5.41801e+07	3.49841e+07	2.25629e+06	0	0	0	0	0	1.27233e+06	1.35571e+07	1.28423e+07	4.24852e+07	7.03483e+07	2.05636e+07	70542.6
202	0	0	0	0	0	0	0	1.26618e+07	2.51014e+07	21674.1	0	0	0	0	0	0	0	0	3.76459e+06	5.39494e+07	5.65882e+07	2.3684e+07	0	0	0	0	0	0	0	0	16213.2	4.81006e+07	5.94311e+07	4.29282e+07	662686	0
203	0	0	0	0	0	0	1.3108e+07	0	2.50341e+06	4.45226e+07	0	0	0	0	0	7123.5	0	0	1.59224e+07	1.81126e+07	4.49306e+07	2.26877e+07	0	0	3706.16	0	0	0	0	0	8142.06	2.62168e+07	6.77758e+07	5.95336e+07	4.979e+06	2.6497e+06
204	0	0	0	0	0	0	0	0	0	0	0	0	0	0	0	0	0	0	2.21543e+07	4.08793e+07	4.4606e+07	8.39269e+07	30148.9	0	0	0	0	0	0	0	0	0	0	706009	0	0
205	0	0	0	0	0	0	624354	7.42697e+06	1.17338e+07	1.3853e+07	60492.7	63610.6	0	0	0	0	0	0	0	9.46859e+06	3.0913e+07	0	0	0	0	0	0	0	0	0	0	6.20622e+06	4.02401e+07	4.1026e+07	64197.4	0
206	0	0	0	0	0	0	0	0	1.04885e+07	4.61075e+07	9.98569e+06	0	3710.04	0	0	0	0	0	0	0	0	1.97998e+06	5.15658e+06	0	0	0	0	0	0	0	0	1.27683e+06	1.98113e+07	7.10942e+06	67596.5	3819.37
207	0	0	0	0	0	0	7.33178e+06	6.31579e+07	4.58556e+07	6.45848e+06	71512	686830	0	0	0	0	0	0	1151.28	6.32894e+06	3.66848e+07	6.49724e+07	1.45353e+07	3.33406e+06	0	0	0	0	0	0	0	2.47955e+06	2.88751e+07	5.44119e+07	1.18016e+07	0
208	0	0	0	0	0	0	0	0	0	0	0	0	0	0	0	0	0	0	0	0	0	0	0	0	1.56413e+07	185191	0	0	0	0	0	635603	1.97654e+07	4.78732e+07	4.29761e+07	9.3669e+06
209	0	0	0	0	0	0	4.32126e+06	3.8309e+07	6.4708e+07	1.22095e+07	0	0	0	0	0	0	0	0	0	0	3562.19	0	0	0	0	0	0	0	0	0	0	0	1.70458e+07	7.7658e+07	1.07128e+07	0
210	0	0	0	0	0	0	0	0	3.53575e+07	3.20685e+06	7334.33	0	0	0	0	0	0	1154.83	2.55971e+06	2.35542e+07	9.32925e+07	6.62341e+07	8.32362e+06	0	0	0	0	0	0	626568	3.07483e+06	3.7092e+06	5.83556e+07	5.87928e+07	4.69635e+07	5.19842e+07
211	0	0	0	0	0	1.9326e+07	4.96883e+07	9.62074e+07	7.99289e+07	3.81567e+07	737062	0	0	0	0	0	0	0	0	0	0	0	0	0	0	0	0	0	0	0	2.43236e+06	7.99274e+06	5.0152e+07	9.35178e+07	6.50614e+06	0
212	0	0	0	0	0	0	0	0	0	0	0	0	0	0	0	0	0	0	0	0	0	0	0	0	0	0	0	0	0	0	0	0	0	0	0	0
213	0	0	0	0	0	0	0	0	0	0	0	0	0	0	0	0	0	1.03712e+07	6.57825e+07	5.99859e+07	5.6961e+06	2.09997e+07	0	0	0	0	0	0	0	0	34848.4	3.36771e+07	8.75843e+07	5.84159e+07	2.20025e+07	5.37018e+06
214	0	0	0	0	0	0	0	0	7.46171e+06	8.92192e+06	0	0	0	0	0	0	0	0	0	0	1.28352e+07	6.196e+07	4.24807e+06	0	1224.25	0	0	0	3.10916e+06	6.76265e+06	4.64404e+07	1.64884e+07	4.01196e+07	3.30188e+07	0	0
215	0	0	0	0	0	11260	22928	2.12488e+07	2.97673e+07	2.75715e+07	7.68936e+06	0	0	0	0	0	0	0	0	0	2.54925e+06	2.92044e+07	1.32817e+06	7582.64	0	0	0	0	0	0	0	2.49508e+06	7.14611e+06	2.32667e+07	0	0
216	0	0	0	0	0	0	2.42962e+06	0	3.08609e+06	1.24014e+07	702276	0	0	0	0	0	0	0	6951.2	2.3609e+07	3.66314e+07	27368.1	0	0	0	0	0	0	0	0	20801.4	1.76772e+07	4.94437e+07	5.26977e+07	3690.93	0
217	0	0	0	0	0	0	0	2338.44	2.48146e+06	9.17629e+06	2.5589e+06	0	0	0	0	0	0	0	2.23924e+07	1.36503e+07	0	3666.51	0	0	0	0	0	0	0	0	0	2.46072e+06	5.59608e+07	4.79253e+07	9.03694e+06	0
218	0	0	0	0	0	0	15073.6	4.48808e+07	9.50859e+07	4.92008e+07	60453.2	0	0	0	0	0	0	0	1.04986e+07	2.78543e+07	2.41813e+07	80358	0	0	0	0	0	0	0	0	0	649746	3.17754e+06	0	730101	0
219	0	0	0	0	0	6964.87	0	2.45544e+06	1.50902e+07	9.82341e+06	0	0	0	0	0	0	0	0	0	0	1.27026e+06	8.92778e+06	67142.1	0	769156	0	0	0	0	0	2.47456e+06	3.9833e+07	5.59848e+07	6.55665e+07	3.20941e+06	82403.2
220	0	0	0	0	0	0	0	0	0	23106.9	2.56466e+06	753151	0	0	0	0	0	0	0	2.56064e+06	4.57422e+07	3.66606e+07	3.23325e+07	1.50603e+07	0	0	0	0	0	0	1.26799e+07	4.73477e+07	5.20325e+07	2.58267e+07	3688.07	0
221	0	0	0	0	0	9.35274e+06	0	0	0	0	0	0	0	0	0	0	0	5.56283e+06	2.59712e+06	6.62172e+07	3.89449e+07	4.62137e+07	9.92772e+06	0	0	0	0	0	146039	1.27082e+06	3.32213e+07	1.35109e+07	5.23786e+07	3.91183e+07	2.6086e+06	786590
222	0	0	0	0	0	17437.1	1.74561e+07	2.79514e+07	4.19346e+07	2.60162e+06	0	0	0	0	0	0	0	0	2.4332e+06	9.18635e+06	4.89108e+07	5.50836e+07	8.95145e+06	0	0	0	0	0	0	0	0	0	9.89031e+06	3.34412e+07	2.27895e+06	0
223	0	0	0	0	0	0	15079.8	3.23866e+07	3.7193e+07	84331	702276	0	0	0	0	0	0	0	4.05405e+07	6.43781e+07	5.45348e+07	1.47776e+07	208969	0	0	0	0	0	0	0	9.64859e+06	2.50856e+06	6.33797e+06	4.13035e+07	0	0
224	0	0	0	0	0	0	0	0	0	0	0	0	0	0	0	0	0	0	0	1.81834e+07	0	0	0	0	1105.5	729917	0	0	0	15118.5	31461.9	3.22313e+07	5.7148e+07	7.85294e+07	2.29121e+07	11183.4
225	0	0	0	0	0	0	3.19882e+06	4.82535e+07	8.45307e+07	5.53547e+07	10947.5	0	734044	3.28952e+06	0	0	0	628410	3.32056e+07	6.69831e+07	6.88534e+07	7.4003e+07	93495.7	0	0	0	0	0	0	1154.53	1.5045e+07	5.36985e+07	5.78143e+07	1.86714e+07	2.05898e+06	75711.4
226	0	0	0	0	0	0	0	0	637915	0	0	0	0	0	0	0	2.48635e+06	652950	8.43552e+06	3.77058e+07	3.36954e+07	2.9449e+07	662549	0	0	0	0	0	0	1153.5	5.07069e+06	1.72943e+07	8.19225e+07	9.12544e+07	7.96496e+06	11407.9
227	0	0	0	0	0	0	0	0	0	0	0	0	0	0	0	0	638777	1.57526e+06	2.86223e+07	3.74265e+07	0	6.41881e+06	0	0	0	0	0	0	0	0	0	1.6827e+07	4.90909e+07	6.69937e+07	671915	1263.22
228	0	0	0	0	0	0	13965.2	0	0	0	0	0	0	0	0	0	0	0	6.068e+06	1.9835e+07	18863.9	0	0	0	0	0	0	0	1173.08	2.39875e+07	2.28561e+07	7.02835e+07	7.50002e+07	5.25458e+07	1.0553e+07	7590.09
229	0	0	0	0	0	0	0	0	0	0	0	0	0	0	0	0	0	0	0	3.09899e+06	3.10071e+06	0	0	0	0	0	0	0	0	0	3502.82	1.43441e+07	3.80632e+07	5.12362e+07	8.9414e+06	0
230	0	0	0	0	0	0	1.72463e+07	2.45039e+06	641404	1.23858e+07	9.3045e+06	0	0	0	0	0	0	0	0	0	2.95918e+07	6.96418e+06	718479	0	0	0	0	0	0	0	2.44625e+06	1.66082e+07	7.09329e+07	4.73421e+07	1.41133e+06	0
231	0	0	0	0	0	627626	2.32699e+07	5.47503e+07	6.68023e+07	4.88371e+07	1.78119e+07	3.34169e+06	0	0	0	650615	0	0	0	3.09659e+06	9.81693e+06	0	0	0	0	0	0	0	0	0	3.71258e+06	6.88486e+07	5.58601e+07	3.24203e+07	27991.7	0
232	0	0	0	0	0	0	0	0	2.53334e+06	0	0	0	10991.7	0	0	0	0	0	0	0	5.52168e+06	2.55267e+07	4.35381e+06	66275.5	0	0	0	0	0	0	0	9085.57	1171.86	0	0	0
233	0	0	0	0	0	0	0	0	0	0	0	0	27111.8	1100.64	0	3594.48	0	0	18582.7	4.39741e+07	4.91457e+06	26738.4	0	0	0	0	0	0	0	0	0	24779.4	5.27875e+07	5.08435e+07	5.23103e+06	7539.35
234	0	0	0	0	0	15130.5	0	0	0	0	10941.8	0	1.61393e+06	0	0	0	0	0	1.34582e+07	9.85243e+06	0	0	0	0	0	0	0	0	0	0	2.427e+06	4.43663e+06	4.04399e+07	3.53421e+07	1.53474e+07	16454.2
235	0	0	0	0	0	0	0	0	636876	0	0	0	0	0	0	0	0	0	0	3.13306e+06	2.38108e+07	3.1937e+06	0	0	0	0	0	0	0	0	0	42231.1	6.13901e+07	6.18387e+07	784923	0
236	0	0	0	0	0	0	0	0	0	0	0	0	0	0	0	0	0	0	4.86667e+06	5.06168e+07	5.12949e+07	7.08064e+06	1.5592e+07	24945.2	0	0	0	0	0	0	4.34068e+06	2.72986e+07	2.21377e+07	1.10636e+08	4.12633e+07	8.67746e+06
237	0	0	0	0	0	0	0	0	0	3.29084e+06	2.13435e+07	1.69785e+07	0	0	0	0	0	0	4.33249e+06	8.62648e+06	0	0	0	0	2.14589e+06	661314	0	0	0	0	8094.82	2.36967e+07	3.79009e+07	1.72565e+07	1217.82	3.40402e+06
238	0	0	0	0	0	0	0	0	0	0	0	0	0	0	0	0	0	0	4.3143e+06	4.78594e+07	5.278e+07	7.98292e+07	3.50199e+07	2.00987e+07	0	0	0	0	3.74706e+06	8.85574e+06	9.40929e+07	8.01151e+06	6.03706e+07	6.92258e+07	9.30519e+06	0
239	0	0	0	0	0	0	1.99367e+07	4.69393e+07	0	0	0	0	0	0	0	0	0	0	0	0	8.01686e+06	0	0	0	2.67366e+06	748154	0	0	0	0	3504.56	9.45724e+06	4.31539e+07	9.49951e+07	1.35435e+07	754710
240	0	0	0	0	0	0	0	2.11143e+07	4.70534e+07	0	0	0	0	0	0	0	0	0	0	0	0	0	0	0	748718	0	0	0	0	0	10511.5	1.53004e+07	5.59637e+07	7.0353e+07	2.11465e+07	2.72283e+06
241	0	0	0	0	0	0	0	0	0	0	0	0	0	0	0	0	0	0	0	0	0	0	0	0	0	0	0	0	0	638050	1.74009e+07	3.33875e+07	5.01923e+07	1.08188e+08	1.79264e+07	1.10504e+07
242	0	0	0	0	0	0	0	0	0	7284	0	0	0	0	0	0	0	0	0	1168.65	3.55008e+07	3.44554e+07	0	0	0	0	0	0	0	0	0	0	0	3666.41	5.14659e+06	0
243	0	0	0	0	0	0	0	0	0	0	0	0	0	0	0	0	0	0	0	0	1.29024e+06	0	0	0	0	0	0	0	0	0	0	0	2.88608e+07	8.76395e+07	9209.73	0
244	0	0	0	0	0	0	0	0	0	0	0	0	0	0	0	0	0	0	1.53212e+07	6.43051e+07	9.20384e+07	4.61829e+07	1.44903e+07	3.40673e+06	0	0	0	0	0	1.25334e+06	1.11364e+07	1.10459e+07	4.85397e+07	6.34564e+07	1.19873e+07	0
245	0	0	0	0	0	8.71268e+06	622492	0	0	0	0	0	0	0	0	0	0	1155.09	625745	24355.2	0	5.73514e+06	5.11043e+06	0	0	0	0	0	0	0	3501.9	2.28641e+07	4.06848e+07	5.84628e+07	4.17634e+07	4.16645e+06
246	0	0	0	0	0	0	1.28672e+06	0	3.04869e+07	6.0389e+06	731439	751935	0	0	0	0	0	0	0	0	3563.62	1.32294e+06	0	0	0	0	0	0	0	0	0	4.89095e+06	4.92287e+07	7.47802e+07	2.54083e+07	0
247	0	0	0	0	0	0	0	0	0	0	0	0	0	0	0	0	0	0	18583.1	6.17126e+06	2.28276e+07	5.89231e+07	1.13411e+07	2.47873e+07	0	0	0	0	0	0	0	8.04987e+06	3.11654e+07	664952	0	0
248	0	0	0	0	0	660326	2.08266e+07	7.08259e+07	5.72078e+07	0	0	0	0	0	0	0	0	0	4.4525e+07	8.0578e+07	9.98492e+07	1.60606e+07	7.09092e+06	4950.51	0	10944.2	0	0	0	0	1.88531e+06	4.97914e+07	8.63903e+07	5.59176e+07	671120	0
249	0	0	0	0	0	0	0	8.84253e+06	652595	9408.8	0	0	0	0	0	0	0	8967.08	1.35963e+07	6.61923e+07	5.70543e+07	7.32218e+07	0	0	0	0	0	0	0	1151.72	4.0425e+07	2.37344e+07	3.14191e+06	0	0	0
250	0	0	0	0	0	0	646763	4.69439e+07	7.61829e+07	2.12715e+07	3690.52	0	0	0	0	2.4925e+06	4.58851e+06	2.16668e+07	2.59042e+07	5.53182e+07	8.43845e+07	6.02254e+07	9.12302e+06	2.66632e+06	0	0	0	0	0	628583	3.33987e+07	2.78072e+07	3.90123e+07	8.17675e+07	3.18226e+06	0
251	0	0	0	0	0	0	0	0	1.23978e+07	5.76353e+06	0	0	0	0	0	0	0	0	0	0	0	7264.54	1101.04	62422.8	0	0	0	0	0	0	0	676892	3.72045e+07	8.36825e+07	2.04397e+07	0
252	0	0	0	0	0	0	0	0	0	0	0	0	0	0	0	0	0	0	0	0	15348.6	30337.8	0	0	0	0	0	0	0	0	4.87481e+06	2.02316e+07	8.75962e+07	3.96795e+07	3.39512e+06	62471.7
253	0	0	0	0	0	0	0	671000	4.22551e+07	4.22599e+07	3.54716e+06	0	0	0	0	0	0	0	0	665029	8.68914e+06	0	0	0	0	0	0	0	0	0	7.87322e+06	1.37894e+07	5.57847e+07	8.29899e+07	4.22336e+07	1.16379e+07
254	0	0	0	0	0	0	0	1165.84	4.39863e+07	4.41877e+07	0	0	0	0	0	0	0	0	9.66658e+06	6.90408e+06	1.44107e+07	3666.61	0	0	0	0	0	0	0	0	0	0	8.13822e+06	0	0	0
255	0	0	0	0	0	0	0	0	0	10866.5	0	0	0	0	0	0	0	0	1.90659e+06	1.9111e+06	1.9202e+06	0	717924	0	0	0	0	0	0	2.03635e+06	3.0526e+06	9.39946e+06	5.02444e+07	7.98237e+07	3.58344e+07	6.83816e+06
256	0	0	0	0	0	0	0	649724	6.93151e+06	5.75503e+06	1.47508e+07	4.12981e+06	0	0	0	0	0	0	641227	2.8341e+07	5.49352e+07	3.75565e+07	0	0	0	0	0	0	0	0	2.42509e+06	1.61219e+07	6.48167e+07	9.96e+07	1.43217e+06	2.71773e+06
257	0	0	0	0	0	0	0	0	0	0	0	0	0	0	0	0	0	0	0	0	15344.3	9.01037e+06	0	724028	0	0	0	9196.9	0	0	0	3.10551e+06	1.18017e+07	2.43837e+07	1.94904e+07	0
258	0	0	0	0	0	0	0	0	1.92823e+06	1.70063e+07	662510	0	0	0	0	0	0	0	0	0	0	0	0	0	0	0	0	0	0	0	0	636602	2.17261e+07	5.82923e+06	665303	0
259	0	0	0	0	0	0	0	0	0	0	0	0	0	0	0	0	0	627468	1.95273e+07	3.28079e+07	6.33218e+07	4.42809e+07	9.23588e+06	0	0	0	0	0	0	0	2.41041e+06	2.32496e+07	4.44016e+07	5.5313e+07	0	0
260	0	0	0	0	0	1.27065e+06	1.10722e+07	2.40397e+07	6.61058e+07	4.35873e+07	0	0	0	0	0	0	8.8758e+06	4.32684e+06	1.04617e+07	6.14157e+07	9.2796e+07	3.76239e+07	10948.3	0	0	0	0	0	0	0	0	0	0	7.64928e+06	0	0
261	0	0	0	0	9118.1	0	1.41251e+07	7.48263e+07	6.12188e+07	4.75417e+07	28108.8	0	0	0	0	0	0	0	4.97234e+06	1.13042e+07	8.09698e+07	2.74798e+07	18229.8	0	0	0	0	0	0	0	7.25632e+06	5.63389e+06	7.75528e+07	6.07134e+07	2.06714e+07	3806.4
262	0	0	0	0	0	0	626470	0	0	0	0	0	0	0	0	0	0	0	0	0	18891	3.45394e+07	0	0	0	0	0	0	0	0	13949.1	8.02875e+06	3.23311e+07	0	0	0
263	0	0	0	0	0	0	644699	6.0753e+07	3.566e+07	3.31263e+07	3.2813e+06	0	0	0	0	0	0	0	6.27342e+06	5.24344e+07	4.3693e+07	3.46308e+07	5.81913e+06	0	0	0	0	0	0	0	0	3.41217e+07	1.96069e+07	6.95828e+07	4.83835e+06	2.64867e+06
264	0	0	0	0	0	0	0	0	0	0	0	0	0	0	0	0	0	0	0	634427	5.84462e+07	2.14602e+07	0	0	0	0	0	0	0	0	0	0	0	1.404e+07	2.60289e+06	0
265	0	0	0	0	0	0	0	4.91382e+06	0	1209.14	2.56104e+06	0	0	0	0	0	0	0	0	0	6.93522e+06	3.20417e+06	18295.6	0	0	0	0	0	0	0	0	648275	5.65582e+06	5.43128e+07	9.96175e+06	752985
266	0	0	0	0	0	0	2.42502e+06	0	0	1.97742e+06	4.26832e+06	0	0	0	0	0	0	0	2.42821e+06	1.32305e+07	7.32409e+07	7.24801e+07	1.93695e+07	1.47435e+06	0	0	0	0	0	32945	2.91415e+07	2.87982e+07	5.75261e+07	4.05333e+07	0	0
267	0	0	0	0	0	0	0	0	0	0	0	0	0	0	0	0	0	0	3497.81	1.61839e+07	7.62957e+07	5.97756e+07	730193	0	0	0	0	0	0	0	0	0	0	0	0	0
268	0	0	0	0	0	1153.61	4.89676e+06	5.71599e+07	7.65562e+07	3.68856e+07	5.61523e+06	2.64808e+06	0	0	0	0	0	0	0	0	0	5.07493e+06	11020.6	0	0	0	0	0	0	0	6988.68	5.59372e+06	5.21768e+07	9.12068e+07	9.36794e+06	0
269	0	0	0	0	0	0	0	0	0	7283.8	0	0	0	0	0	0	0	0	0	1.61812e+07	2.41503e+07	1.31052e+06	0	0	0	0	0	3594.37	15320.4	1.29629e+07	4.587e+07	4.73347e+07	4.93224e+07	5.14414e+07	4.26684e+07	3.98173e+06
270	0	0	0	0	0	0	0	0	0	0	0	0	0	0	0	0	0	0	2.43174e+06	0	1162.36	0	2.63035e+06	0	0	0	0	0	0	0	0	2.47579e+06	5.38528e+07	6.69704e+07	1.75885e+07	0
271	0	0	0	0	0	31419.4	1.48923e+07	2.98833e+07	6.11031e+07	657532	15935.1	11280.3	0	0	0	0	0	0	0	0	0	0	0	0	0	0	0	0	0	1.72514e+07	2.27078e+07	5.44995e+07	5.31145e+07	4.45977e+07	8.69057e+06	1264.74
272	0	0	0	0	0	0	0	0	0	0	18277.3	7590.51	0	0	0	0	0	1154.13	0	0	0	7281.52	0	0	0	0	0	0	0	633541	2.25793e+07	4.57553e+07	4.53497e+07	3.47508e+07	1.32957e+07	7.42619e+06
273	0	0	0	0	0	2.43443e+06	1.16142e+07	2.31628e+07	4.18485e+07	7.06921e+07	1.07928e+07	8722.85	0	0	0	0	0	2.43429e+06	1.32849e+07	1.93612e+07	1.10773e+07	7.43496e+07	7.71418e+06	4.73325e+06	0	0	0	0	0	1.43491e+06	3.70685e+06	1.3962e+07	7.41996e+07	7.50053e+07	2.21375e+07	4.37534e+06
274	0	0	0	0	0	0	0	4.34596e+06	4.45971e+07	1.01297e+07	0	0	0	0	0	0	0	1155.16	0	3495.96	5.95803e+07	5.12294e+07	3.75291e+07	76442.9	0	0	0	0	0	0	3497.81	1.17675e+07	1.72889e+07	16982.9	0	0
275	0	0	0	0	0	0	0	0	1.19744e+07	1.68766e+07	8.84902e+06	0	0	0	0	0	0	0	17297.1	3.56269e+07	2.58017e+07	4.45679e+07	1.23556e+07	752561	0	0	0	0	0	0	0	0	3.09997e+06	1.74009e+07	0	0
276	0	0	0	0	0	0	0	0	15357.3	2.57271e+06	789879	0	0	0	0	0	0	0	1.26055e+07	5.59356e+07	1.08355e+08	6.03882e+07	3.25686e+07	0	0	0	0	0	0	1.41281e+06	1.21384e+07	6.08555e+07	3.98528e+07	7.09384e+07	2.71897e+07	7.3471e+06
277	0	0	0	0	0	3.78887e+06	1.21673e+07	634123	2.45327e+06	32522.8	7335.16	0	0	0	0	0	0	1.25756e+06	1.66383e+07	7.21427e+07	5.20908e+07	0	0	0	0	0	0	0	0	0	0	0	0	2.5174e+06	790985	7589.68
278	0	0	0	0	0	0	0	0	0	0	0	0	0	0	0	0	0	0	0	0	0	1209.21	0	0	0	0	0	0	0	0	2.44713e+06	5.04107e+06	5.48299e+07	3.80961e+07	2.19679e+07	132909
279	0	0	0	0	0	312366	4.19476e+07	7.01282e+07	7.43054e+07	1.74694e+07	9.40225e+06	185168	0	0	0	0	0	0	0	0	0	0	0	0	0	0	0	0	0	0	0	0	0	0	0	0
280	0	0	0	0	0	0	0	0	0	0	0	0	0	0	0	0	0	0	0	0	4.36565e+06	3.8625e+06	0	0	0	0	0	0	0	0	10406.2	2.86751e+07	2.51371e+07	6.51936e+07	0	0
281	0	0	0	0	0	0	0	0	0	0	0	0	0	0	0	0	0	0	0	0	2.93722e+07	682686	0	0	0	0	0	0	0	15120	656687	3.16655e+07	2.65888e+07	6.55592e+07	0	0
282	0	0	0	0	0	0	0	0	0	0	0	0	0	0	0	0	0	0	0	5.13562e+06	7.6095e+07	8.41366e+07	1.478e+07	0	0	0	0	0	0	0	24434.2	1.60919e+07	4.32686e+07	5.90419e+07	4.64364e+07	2.2589e+07
283	0	0	0	0	0	0	0	0	0	0	0	0	0	0	0	0	0	0	0	0	0	0	0	0	0	0	0	0	0	0	1.97781e+07	0	0	0	740125	753280
284	0	0	0	0	0	0	2.66768e+06	0	291087	3.52871e+06	0	0	0	0	0	0	0	0	0	0	0	0	0	0	0	0	0	0	0	0	0	13970.3	3.64965e+07	4.5708e+07	3.35162e+06	0
285	0	0	0	0	0	0	1.4098e+07	0	0	0	0	0	0	0	0	0	0	0	0	7061.58	6.8441e+06	0	1218.08	0	0	0	0	0	0	3.14541e+06	6.42048e+07	6.31345e+07	6.57976e+07	4.96723e+07	890381	7478.26
286	0	0	0	0	0	0	0	0	0	707369	0	0	0	0	0	0	0	2.02833e+07	1.09647e+07	17669.8	7.38182e+06	0	0	0	0	0	0	0	0	0	0	0	2.56791e+07	8.45597e+07	3.28194e+07	8.41069e+06
287	0	0	0	0	0	629506	1.51115e+07	2.80343e+07	6.68433e+07	4.44696e+07	2.21022e+06	0	0	0	0	0	0	0	0	3.73552e+06	3.23433e+07	7.36447e+07	7.56589e+06	0	0	0	0	0	0	0	1.25261e+06	1.60523e+07	5.87488e+07	7.2388e+07	4.24731e+07	4.04067e+07
288	0	0	0	0	0	0	0	0	676088	669465	0	0	0	0	0	0	0	2.23112e+07	2.19347e+07	2.50447e+07	636582	0	0	0	0	0	0	0	0	0	0	0	1.98831e+07	1.74553e+07	0	16558
289	0	0	0	0	0	0	0	0	0	0	0	0	0	0	0	0	0	0	0	2.45526e+06	1.26836e+06	0	0	0	0	0	0	0	0	0	5.45852e+06	6.86269e+06	3.85197e+07	6.78679e+07	1.65551e+07	2.65229e+06
290	0	0	0	0	0	0	0	0	0	0	0	0	0	0	0	0	0	0	6.1222e+06	1.60641e+07	3.76304e+07	3.09651e+07	749653	0	0	0	0	0	0	1154.2	4.04585e+07	7.3829e+07	4.69318e+07	2.73505e+07	6.87046e+06	0
291	0	0	0	0	0	15080.8	2.43776e+06	2.80184e+07	3.97373e+07	15841.8	0	0	0	0	0	0	0	0	0	5.71489e+07	5.37714e+07	5.66938e+07	0	0	0	0	0	0	0	15139.1	9.27707e+06	2.47092e+06	649670	2.58073e+06	3690.22	0
292	0	0	0	0	0	0	0	0	0	0	0	0	0	0	0	0	0	0	2.42384e+06	1.10043e+07	3.91402e+07	2.34929e+07	0	0	0	0	0	0	0	0	0	17666.3	2.02438e+07	6.33613e+07	2.20482e+07	4.91375e+06
293	0	0	0	0	0	0	0	0	0	0	0	0	0	0	0	0	0	9.15738e+06	6.35424e+07	9.50777e+07	5.5846e+07	1.41566e+07	1.32441e+06	0	0	0	0	0	0	0	3505.68	8.05022e+06	2.12951e+07	7.34219e+07	5.50021e+06	7591.13
294	0	0	0	0	0	0	0	2.47527e+06	4.77424e+07	3.35132e+07	0	0	0	0	0	0	0	0	0	0	0	0	0	0	0	0	0	0	0	0	20841.5	1.29553e+07	3.34573e+07	6.26355e+07	3.86341e+07	1.07345e+07
295	0	0	0	0	0	0	0	0	0	0	0	0	0	0	0	0	0	1.12805e+07	3.07084e+07	8.52661e+07	6.19036e+07	2.78588e+07	1.19139e+07	6.25174e+06	0	0	0	0	0	0	0	0	3545.33	3.5006e+07	1.73626e+07	64423.6
296	0	0	0	0	0	0	0	0	4.92506e+06	3.03889e+07	2.09668e+07	0	0	0	0	0	0	8967.38	9.92655e+06	632675	4.5199e+07	2.67131e+07	5.9546e+06	0	0	0	0	0	1173.82	0	1.64156e+07	4.20351e+07	6.2346e+07	9.35085e+07	2.30025e+07	3.02534e+06
297	0	0	0	0	0	0	0	0	0	0	0	0	0	0	0	0	0	0	0	7.38553e+06	2.54202e+06	0	0	0	0	0	0	0	0	0	0	6.69507e+07	6.70037e+07	6.1379e+07	15938	62478
298	0	0	0	0	0	11274.7	7.28433e+06	4.35133e+06	48793.4	0	0	0	0	0	0	0	0	0	0	0	0	0	0	0	0	0	0	0	0	0	0	2.48912e+06	3.31636e+07	4.90444e+07	7.72309e+06	0
299	0	0	0	0	0	626529	3.46673e+07	7.75733e+07	4.99597e+07	942668	0	0	0	0	0	0	0	0	0	0	638714	0	0	0	0	762006	690710	0	9110.94	3.04381e+06	3.69242e+07	3.13572e+07	4.72191e+07	8.28923e+07	4.08788e+06	62424.3
300	0	0	0	0	0	657960	4.80203e+06	5.00545e+06	5.21133e+07	3666.31	3690.32	0	0	0	0	0	0	0	0	0	0	0	0	0	0	0	0	0	0	190537	9.7126e+06	2.09273e+07	3.94749e+07	1.04701e+08	2.60923e+07	1.23153e+07
301	0	0	0	0	0	0	0	0	0	0	0	0	0	0	0	0	0	0	0	6.87782e+06	7.83222e+07	4.76414e+07	1.61828e+07	0	0	0	0	0	0	0	0	0	3.21868e+07	1.16388e+07	9.85159e+06	0
302	0	0	0	0	0	0	1149.99	648822	1.86301e+07	0	0	0	0	0	0	0	0	0	8.68126e+06	5.72379e+06	3.0963e+07	5.13517e+07	1.44288e+07	0	0	0	0	0	0	0	6956.58	2.61998e+07	5.73923e+07	1.0377e+08	3.54241e+07	1.17078e+07
303	0	0	0	0	0	628587	0	1.47119e+07	4.33793e+07	3.15322e+07	0	0	0	0	0	0	0	0	0	0	0	0	73667.6	0	0	0	0	0	0	0	0	1.61528e+07	652564	0	0	0
304	0	0	0	0	0	0	5.42743e+06	4.86966e+07	1.23882e+07	664517	0	0	0	0	0	0	0	0	0	659320	2.79224e+07	2.1599e+07	69835.6	0	0	0	0	0	0	0	626843	1.5501e+07	4.0524e+07	4.8616e+07	1.50759e+06	0
305	0	0	0	0	0	4.85594e+06	2.54889e+07	5.79202e+07	3.23753e+07	7284.62	0	0	0	0	0	0	0	0	0	2.17566e+07	4.53321e+07	6.81104e+07	2.98886e+07	1.76358e+07	0	0	0	0	0	11273.2	3.08025e+07	2.49899e+07	4.30009e+07	1.04275e+08	2.20956e+07	0
306	0	0	0	0	0	0	0	1.94336e+06	4.99492e+07	1.17876e+07	75519.2	0	0	0	0	0	0	0	0	0	0	0	0	0	733694	0	0	0	0	0	2.07693e+07	495779	3.93403e+07	5.0253e+07	1.29421e+07	2.79627e+07
307	0	0	0	0	0	0	0	0	0	2.04574e+06	0	0	0	0	0	0	0	0	0	657251	2.38057e+07	8.0016e+07	9.6883e+06	0	0	0	0	0	0	0	0	21137.6	5.9564e+07	7.09115e+07	1.7941e+07	0
308	0	0	0	0	0	15138.6	3.72531e+06	3.34157e+07	6.05448e+07	3.50073e+07	88077.1	0	0	0	0	0	0	2.42738e+06	3.04053e+06	1.59652e+07	5.73123e+07	1.8603e+07	0	0	2.58152e+06	0	0	8.9581e+06	1.28595e+06	4.31178e+07	5.13176e+07	4.63716e+07	4.51428e+07	8.13463e+07	3.47381e+07	3.4207e+06
309	0	0	0	0	0	0	627876	8.7219e+06	1.95181e+07	5.73305e+06	0	0	0	0	0	0	0	0	0	0	0	0	0	0	0	0	0	0	0	0	7.29169e+06	1.05233e+07	4.39225e+07	1.04841e+07	15958.1	0
310	0	0	0	0	0	0	0	0	0	0	0	0	0	0	0	0	0	0	1.25403e+06	3.54547e+07	7.35972e+07	8.19756e+07	1.80901e+07	1.49056e+06	1.87497e+07	49504.7	0	0	0	1146.92	1.59037e+07	6.13697e+07	7.30094e+07	8.87455e+07	5.31648e+07	2.20232e+07
311	0	0	0	0	0	0	0	0	0	0	0	0	0	0	0	0	0	0	626941	1.32382e+07	2.2885e+07	4.72806e+07	102731	723586	0	0	0	0	0	0	1.2106e+07	1.3196e+06	2.62685e+07	7.10527e+07	1.42987e+07	2.64764e+06
312	0	0	0	0	1.28106e+06	3.19882e+07	3.84762e+07	8.74753e+06	1.23021e+07	1.39647e+06	0	0	0	0	0	0	0	1155.05	3.67696e+06	9.78689e+06	4.91259e+07	5.08587e+07	0	0	0	0	0	0	0	24055.1	1.59105e+07	2.30665e+07	9.04702e+07	7.90981e+07	5.80082e+07	2.67791e+06
313	0	0	0	0	0	0	0	0	0	0	0	0	0	0	0	0	0	0	2.49404e+06	1.04668e+07	5.5326e+07	2.79091e+07	0	0	0	0	0	0	0	0	0	2.23237e+07	4.06067e+07	3616.84	0	0
314	0	0	0	0	0	2.43321e+06	0	31803	2339.77	8.44006e+06	0	0	0	0	0	0	0	0	643395	3.86074e+07	5.90917e+07	4.92676e+07	1.24582e+07	2.61371e+06	0	0	0	0	0	0	0	1.83252e+07	4.71524e+07	0	0	0
315	0	0	0	0	0	143027	4.31016e+06	1.5311e+07	2.23257e+07	2.08297e+07	654318	0	0	0	0	0	0	8967.68	6.33621e+07	5.62726e+07	3.6097e+07	1.8681e+07	0	69996.4	0	0	0	0	0	0	0	0	0	0	0	0
316	0	0	0	0	0	0	0	636230	2.20654e+07	166587	2.57364e+06	0	0	0	0	0	0	0	0	0	0	0	0	0	1105.39	0	0	0	0	0	0	3.72287e+06	2.19682e+07	0	0	0
317	0	0	0	0	0	0	0	0	1.50469e+07	0	0	0	0	0	0	0	0	0	0	0	0	0	0	0	733086	0	0	0	0	944520	2.42053e+07	564601	6.80473e+07	5.4824e+07	1.44066e+07	1260.56
318	0	0	0	0	0	0	0	0	1.50974e+07	665765	0	0	0	0	0	0	0	0	27837.2	6.21224e+07	6.14969e+07	1.9268e+07	0	0	0	0	0	0	0	0	0	8241.31	3.31296e+07	6.62715e+07	1.45215e+07	50506.2
319	0	0	0	0	0	0	0	0	1.44986e+07	1.01846e+07	0	0	0	0	0	0	0	0	0	8.0002e+06	0	0	0	0	0	0	0	0	0	0	0	2.47021e+06	1.01367e+07	7.58592e+06	0	0
320	0	0	0	0	0	0	0	635897	3562.19	0	0	1263.37	2.60176e+06	0	0	0	0	0	0	0	0	0	0	0	0	0	0	0	0	0	5.47182e+06	2.69086e+07	3.65687e+07	6.31023e+06	0	0
321	0	0	0	0	0	0	627462	636818	0	0	0	0	0	0	0	0	0	0	3.0339e+06	3.31921e+06	1.3863e+07	2.98545e+07	2.6603e+06	2.65936e+06	0	0	0	0	0	0	7.30239e+06	2.56783e+07	6.74127e+07	7.12834e+07	1.58197e+07	1.52792e+06
322	0	0	0	0	0	0	625667	1.8868e+07	3.8004e+06	0	0	0	0	0	0	0	0	0	1.31076e+07	4.29545e+07	8.94056e+07	9.53471e+07	1.20821e+07	0	0	0	0	0	0	0	7010.54	7.42944e+06	2.74035e+07	6.43242e+07	3.58888e+07	9.31974e+06
323	0	0	0	0	0	0	0	0	0	0	0	0	0	0	0	0	0	0	0	0	0	0	0	0	0	0	0	0	0	2.42278e+06	2.29024e+07	3.43815e+07	7.1973e+07	8.26682e+07	3.02707e+07	63684.3
324	0	0	0	0	0	0	0	0	0	0	0	0	0	0	0	0	0	663007	7.96675e+06	7.60589e+07	6.53835e+07	9.33942e+07	3.68731e+07	2.04089e+07	0	0	0	0	0	0	3.05945e+06	2.05638e+07	1.11511e+07	3.77697e+07	3.22896e+06	0
325	0	0	0	0	0	0	0	0	5.02361e+06	1.23626e+07	0	0	0	0	0	0	0	0	1.40005e+06	5.68331e+07	6.63003e+07	3.98065e+07	2.67828e+06	0	0	0	0	0	0	637878	688021	8.92749e+06	7.98153e+07	7.82509e+07	2.10535e+07	2.65839e+06
326	0	0	0	0	0	1.25337e+06	2.12165e+07	2.21546e+07	1.03992e+07	2.53697e+06	0	0	0	0	0	0	0	15127.6	6.15341e+06	3.05306e+07	6.41571e+07	5.60465e+06	1216.78	15097.9	0	0	0	0	0	0	0	636230	2.4594e+06	0	0	0
327	0	0	0	0	0	0	0	0	0	0	0	0	0	0	0	0	0	0	0	2.47543e+06	2.22557e+07	7282.55	3.61596e+06	749462	0	0	0	0	0	0	2.42675e+06	3.17226e+07	7.70327e+07	9.58443e+07	5.85037e+06	0
328	0	0	0	0	0	1.27055e+06	2.43793e+07	9.64437e+07	6.99322e+07	3.52169e+07	3.32837e+07	3.97005e+06	0	0	0	0	0	0	1.54397e+07	4.83819e+07	6.42478e+07	1.30006e+07	81772.2	0	0	0	0	0	0	5.04217e+06	3.17595e+07	1.9013e+07	7.96837e+07	9.70563e+07	2.07448e+07	0
329	0	0	0	0	0	627332	626686	15301.8	1.23759e+07	3.22057e+06	0	0	0	0	0	0	0	0	0	0	2.36116e+07	4.14995e+07	2.55945e+06	0	0	0	0	0	0	146429	2.7382e+07	3.79647e+07	8.64965e+07	6.40301e+07	2.49929e+07	0
330	1.39944e+06	0	0	0	0	0	0	0	2.86266e+07	5.14785e+07	668727	0	0	0	0	0	0	0	6938.57	1.29087e+06	1.32436e+07	1.16748e+07	15939.4	0	0	0	0	0	0	0	0	2.47191e+06	10244.9	0	0	0
331	0	0	0	0	0	0	628436	1.94632e+07	3.91584e+07	3.30881e+07	0	0	0	0	0	0	0	0	0	4.37934e+06	4.38513e+07	3.53591e+07	9.9725e+06	0	0	0	0	0	0	0	0	6.1794e+06	6.14493e+07	8.16618e+07	3.4943e+07	7565.89
332	0	0	0	0	0	0	641264	3.101e+06	4.57847e+07	7.64411e+06	68874.4	0	0	0	0	0	0	0	0	685567	3.94986e+07	4.0699e+07	0	0	0	0	0	0	0	30261.5	1.05351e+07	2.01533e+07	4.70006e+07	1.10653e+08	4.48214e+07	5.37365e+06
333	0	0	0	0	0	0	3.07528e+06	4.77928e+07	7.07197e+07	7.55542e+07	1.75333e+07	0	0	0	0	0	0	0	0	0	0	0	0	0	0	0	0	0	0	0	0	8.83675e+06	2.84875e+07	0	0	0
334	0	0	0	0	0	0	1.28983e+06	3.37138e+07	6.34839e+07	5.62202e+07	0	0	0	0	0	0	0	0	0	1.97147e+07	6.2858e+07	3.98832e+07	661138	0	10992.8	0	0	0	0	6.66829e+06	2.24323e+07	3.64197e+07	6.49691e+07	4.26198e+07	4.14085e+06	3.32917e+06
335	0	0	0	0	0	0	0	1.05544e+07	7.63685e+07	4.91234e+07	3.37787e+06	686967	0	0	0	0	0	0	0	3.09413e+06	4.76033e+07	6.70199e+07	2.59075e+07	1.67577e+06	0	0	0	0	0	0	0	0	3.23146e+07	5.19677e+07	4.0207e+06	0
336	0	0	0	0	0	0	641964	4.31859e+07	3.34762e+07	1.67553e+07	0	0	0	0	0	0	0	0	2.43273e+06	3.93691e+07	9.1729e+07	3.29308e+07	3.62313e+06	0	0	0	0	0	0	0	0	6.15016e+06	6.30918e+07	5.30326e+07	1.49052e+07	0
337	1.43474e+06	0	0	0	0	0	0	0	0	0	0	0	0	0	0	0	15376.9	1.87547e+06	2.25664e+07	8.99896e+07	6.38406e+07	4.88488e+07	2.09072e+07	61791	0	0	0	0	0	0	0	28249.9	2.44867e+07	1.12289e+07	152777	0
338	0	0	0	0	0	0	0	0	0	0	0	0	1.43857e+06	60464.3	0	0	0	1.58366e+07	1.06244e+08	4.75559e+07	7.29058e+07	1.65828e+07	723918	9851.71	0	0	0	0	0	0	626593	1.91998e+07	3.6327e+07	3.06713e+07	0	0
339	0	0	0	0	0	0	2.42531e+06	1.29464e+06	2.36925e+07	0	0	0	0	0	0	0	9108.55	3.78699e+06	2.37371e+07	5.33899e+07	8.11466e+07	5.25703e+06	0	0	0	0	0	0	0	0	0	2.44098e+06	3.95608e+07	8.71737e+07	8.42443e+06	1.03283e+07
340	0	0	0	0	0	0	0	0	631576	3.29936e+07	1.38999e+07	0	0	0	0	0	0	0	13958.9	2.92661e+07	4.00047e+07	3.79105e+07	27636.4	0	0	0	0	0	0	1.94886e+07	4.744e+07	2.56016e+07	6.28297e+07	6.79131e+07	5.29428e+07	3.79676e+07
341	0	0	0	0	0	0	15081.7	4.02902e+06	5.05214e+07	2.05887e+07	0	0	0	0	0	0	0	0	7.40084e+06	3.2303e+07	4.07823e+07	8.43774e+07	6.90925e+06	753501	0	0	0	0	0	626841	7.89199e+06	1.1829e+07	5.25905e+07	8.00165e+07	2.0574e+07	772174
342	0	0	0	0	0	632317	4.91758e+06	5.83807e+07	1.02801e+08	3.71381e+07	1.07016e+07	0	0	0	0	0	0	628352	3.91649e+07	6.18639e+07	8.34814e+07	4.94571e+07	9.12971e+06	0	0	0	0	0	0	0	1.32428e+07	3.30581e+07	6.2842e+07	7.37776e+07	8.30457e+06	0
343	0	0	0	0	0	0	0	0	4.51151e+06	0	0	0	0	0	0	0	0	0	2.25496e+07	5.04324e+07	3.96374e+07	2.17683e+07	0	0	0	0	0	0	0	0	17321.8	3.52782e+07	4.07202e+07	8.66005e+07	2.30121e+07	0
344	0	0	0	0	0	0	0	8.83702e+06	636680	0	0	0	1104.49	1.46044e+06	0	0	0	0	2.43293e+06	1.65526e+07	4.81127e+07	7.16137e+07	60566.5	0	0	0	0	0	0	0	1.64552e+07	1.18185e+07	4.17386e+07	4.1347e+07	15955.2	723798
345	0	0	0	0	0	0	0	0	0	0	0	0	7370.36	10946.9	0	0	10291.1	1154.72	3505.58	0	12660.2	1209.8	0	0	2.16995e+06	4903.11	708771	9.92925e+06	8.85273e+06	2.04838e+07	3.84609e+07	2.12403e+07	6.47145e+07	4.66188e+07	2.08573e+06	2263.85
346	0	0	0	0	0	643824	1.63491e+07	9.83715e+06	9.57989e+07	1.93319e+07	0	0	0	0	0	0	0	0	0	9.8638e+06	5.1694e+07	5.99905e+07	0	0	0	0	0	0	0	629310	1.93333e+07	2.67043e+07	6.41659e+07	2.35666e+07	0	0
347	0	0	0	0	0	0	4.84185e+06	4.14297e+07	3.76959e+07	1.84987e+07	8.23953e+06	1.43633e+06	3705.03	0	0	0	0	1.28913e+06	2.92445e+07	1.03481e+08	4.03938e+07	2.35347e+07	72974.5	0	0	0	0	0	0	0	2.53785e+06	3.02175e+07	7.09227e+07	32818	0	0
348	0	0	0	0	0	0	3501.49	3.03369e+07	4.6254e+07	4.07238e+07	1.53843e+07	0	708904	0	0	3587.94	639890	4.31206e+06	3.42197e+07	9.5367e+07	8.30586e+07	2.02026e+07	1.15638e+07	1.47894e+06	0	0	0	0	0	1.25725e+06	4.26148e+07	7.0956e+07	5.18649e+07	8.81529e+07	2.82517e+07	0
349	0	0	0	0	0	0	4.86375e+06	2.60017e+06	0	0	0	0	0	0	0	0	0	0	3505.58	3.82347e+06	5.65531e+07	5.8612e+07	1.41709e+07	0	0	0	0	0	0	0	0	4.91043e+06	3.35182e+07	1.3784e+06	0	0
350	0	0	0	703041	3.11576e+06	1.9931e+07	1.28166e+07	3.40926e+07	6.77891e+07	4.67883e+07	2.63593e+06	0	0	0	0	0	0	0	6.05935e+06	2.46532e+07	5.44517e+07	2.53117e+07	0	0	0	0	0	0	0	0	1.17296e+07	4.50418e+07	7.53996e+07	6.07296e+07	0	0
351	0	0	0	0	0	0	0	0	2.46979e+06	6.41186e+06	0	0	0	0	0	0	0	0	6965.59	4.12817e+07	6.05616e+07	2.67365e+07	1.15221e+07	0	0	0	0	0	0	3.7938e+06	6.072e+07	5.82606e+07	4.66482e+07	8.80591e+07	2.2379e+07	3.37517e+06
352	0	0	0	0	0	0	9.93429e+06	0	0	0	0	0	0	0	0	0	0	0	0	0	0	0	0	0	0	0	0	0	0	0	17390.7	2.48432e+07	2.4184e+07	4.92858e+07	0	0
353	0	0	0	0	0	628234	1.65665e+07	0	0	0	0	0	0	0	0	0	0	0	0	0	2.67741e+07	4.7648e+07	2.52073e+06	172824	0	0	0	0	0	0	0	0	8.86864e+06	9.5368e+06	0	0
354	0	0	0	0	0	0	0	0	0	0	0	0	0	0	0	0	0	0	0	2.40357e+07	7.74402e+07	6.00659e+07	20436.5	11394.2	0	0	0	0	0	0	0	3543.08	5.18737e+07	4.307e+07	0	0
355	0	0	0	0	0	0	6.15366e+06	3.73997e+06	5.0923e+07	2.97771e+07	1.68277e+07	7615.55	0	0	0	0	0	0	0	636181	2.43316e+07	2.54265e+06	0	0	712439	0	0	0	0	0	1.20437e+07	3.13847e+07	5.97593e+07	3.49106e+07	6.41191e+06	0
356	0	0	0	0	0	0	0	0	2341.91	671945	0	0	0	0	0	0	0	0	1.25188e+06	0	1.04923e+07	3.13383e+07	0	0	0	0	0	0	0	0	0	3.08761e+06	7.33264e+06	4.8369e+07	1.35592e+07	735416
357	0	0	0	0	0	0	1.94174e+06	2.48496e+07	8.49494e+07	2.21234e+07	1.24822e+07	0	0	0	0	0	0	1.877e+06	7.11864e+07	4.89307e+07	9.14103e+07	5.39918e+07	1.09577e+07	1.49483e+06	0	0	0	0	0	0	1.64335e+07	1.12608e+07	8.95224e+07	1.03228e+08	2.93619e+07	1.68648e+07
358	0	0	0	0	0	0	0	0	653719	3.45266e+06	3658.13	0	0	0	0	0	0	15127.2	1150.8	631840	6.25431e+07	6.846e+07	762713	0	0	0	0	0	0	0	0	0	0	0	0	0
359	0	0	0	0	0	0	626117	9.51736e+06	5.34153e+07	0	0	0	0	0	0	0	0	0	1.26697e+06	1.06098e+07	7.09623e+07	1.65941e+07	4.69737e+06	0	0	0	0	0	0	0	0	0	2.46969e+06	4.17817e+07	1.99624e+07	0
360	0	0	0	0	0	0	0	0	0	0	0	0	0	0	0	0	0	0	4.98612e+07	5.73164e+07	7.31584e+07	3.81793e+07	1.35299e+06	0	0	0	0	0	0	0	0	9.89262e+06	3.66378e+07	5.854e+07	668217	0
361	0	0	0	0	0	0	0	1.26576e+06	2.64645e+07	5.31921e+07	2.81286e+07	5.81943e+07	0	0	0	0	0	0	626607	0	0	0	0	0	0	0	0	0	0	0	0	28252.4	3.17227e+06	3.47553e+07	6.15245e+06	2.657e+06
362	0	0	0	0	0	0	1.05393e+07	2.53176e+07	3.75052e+07	2.53353e+06	0	0	0	0	0	0	0	0	0	0	0	0	0	0	0	0	0	0	0	772095	7.83941e+06	6.35032e+07	5.39507e+07	9.33769e+07	7.86409e+06	3801.59
363	0	0	0	0	0	0	4.29943e+06	0	0	0	0	0	60777	0	0	0	0	1154.42	3.15212e+07	9.16334e+07	6.58248e+07	1.97849e+07	0	0	0	0	0	0	0	0	14005.9	2.10949e+07	4.66233e+07	6.88708e+07	1.63789e+07	3814.16
364	0	0	0	0	0	0	669812	5.94339e+06	5.6738e+07	5.16512e+06	0	0	0	0	0	0	0	1.08948e+07	3.16508e+07	9.06711e+07	7.11388e+07	4.45849e+07	894777	0	0	0	0	0	0	0	0	1.55203e+07	4.56666e+07	3.84117e+07	0	0
365	0	0	0	0	0	628939	641790	0	0	0	0	0	0	0	0	0	0	0	0	1.26497e+06	2.24002e+07	3.21873e+06	0	0	0	0	0	0	0	0	8.45951e+06	5.43139e+07	5.9484e+07	6.20344e+07	4.19579e+07	2.13496e+07
366	0	0	0	0	0	0	0	0	0	59778.8	3690.32	0	0	0	0	0	0	0	627946	2.04449e+07	4.68941e+07	2.34554e+07	1.2588e+07	1.69584e+07	0	0	0	0	0	0	0	3.10256e+06	1.53746e+07	3.95304e+07	0	0
367	0	0	0	0	0	0	1.05314e+07	4.91894e+07	4.30239e+07	2.75545e+07	1.99606e+07	0	0	0	0	0	0	10118.9	9.95702e+06	8.7225e+07	7.76988e+07	1.08528e+07	0	0	0	0	0	0	0	3.09109e+06	3.80006e+07	1.86541e+07	8.18989e+07	1.08854e+08	1.5921e+07	0
368	0	0	0	0	0	1153.42	2.88163e+07	9.94028e+07	7.13379e+07	4.41904e+07	121020	0	0	0	0	0	0	0	0	0	1.05158e+07	0	0	0	0	0	0	0	0	0	2.41897e+06	1.34939e+07	7.18785e+07	5.98126e+07	4.67449e+07	8.021e+06
369	0	0	0	0	0	0	8.6069e+06	3.51865e+07	0	0	0	0	0	0	0	0	0	0	0	1166.17	64158.5	8.93271e+06	0	0	0	0	0	0	0	1154.61	9.69768e+06	8.81386e+06	4.80511e+07	6.77929e+07	1.33745e+07	4.16558e+06
370	0	0	0	0	0	0	0	0	0	0	0	0	10993.6	0	0	0	0	633946	4.29774e+07	6.46072e+07	6.49735e+07	2.37177e+07	0	0	0	0	0	0	0	0	1.48904e+07	1.97939e+07	5.50077e+07	651793	0	0
371	0	0	0	0	0	0	0	0	0	0	0	0	0	0	0	0	0	1.62683e+07	7.4319e+07	1.40978e+07	1.28456e+07	2.62976e+07	0	0	0	0	0	0	0	0	5.51062e+06	2.41087e+07	6.58925e+07	8.2618e+07	3.99179e+07	2.40907e+07
372	0	0	0	0	0	0	630834	1.64724e+07	6.3321e+07	1.4573e+07	0	0	0	0	0	0	0	0	0	644946	5.62159e+06	657865	0	0	0	0	0	0	0	0	0	0	664782	3.45785e+07	2.57225e+06	0
373	0	0	0	0	15370.2	1.21876e+07	5.38934e+07	6.54358e+07	4.67311e+07	1.35234e+06	14647.3	0	0	0	0	0	0	628939	1.1756e+07	4.84823e+07	3.93668e+07	6.5461e+07	60415.3	0	2.17676e+06	0	0	0	0	0	2.03356e+06	6.53607e+07	4.43365e+07	4.3271e+07	0	0
374	0	0	0	0	0	644342	2.4729e+07	2.4689e+06	2.45105e+06	0	0	0	732570	0	0	0	0	0	13958.4	3.19653e+07	5.17803e+07	2.96332e+07	25622.6	0	0	0	0	0	0	0	2.44215e+06	2.26846e+07	6.17723e+07	7.18249e+07	1.1742e+07	0
375	0	0	0	0	0	0	2.41543e+06	650092	3.21671e+07	1.86207e+07	0	0	0	0	0	0	0	0	3502.82	15311.3	10645.7	0	0	0	0	0	0	0	0	0	10469.8	1.69667e+07	4.70276e+07	1.08745e+08	3691.14	0
376	0	0	0	0	0	0	3.0389e+06	1.06829e+07	0	0	0	0	0	0	0	0	0	15121.4	16228.8	5.09979e+07	6.53045e+07	4.79167e+07	2.56738e+06	686517	733159	0	0	0	0	2304.52	1.67328e+07	3.87656e+07	7.55027e+06	1.24632e+07	0	0
377	0	0	0	0	0	1154.64	3.05246e+06	0	0	0	0	0	0	0	0	0	0	0	0	3.88996e+07	3.26985e+07	656180	0	0	0	0	0	0	0	0	0	1.05108e+07	7.47268e+07	6.32503e+07	8.34295e+06	1262.26
378	0	0	0	0	0	0	0	0	0	0	0	0	0	0	0	0	0	0	0	0	0	0	0	0	0	0	0	0	0	1154.94	7.36038e+06	6.92899e+07	8.24973e+07	6.67367e+07	5.71421e+06	62298
379	0	730027	0	0	0	0	0	0	1.28349e+07	1.3181e+07	0	0	0	0	0	0	0	0	0	0	0	170805	2.55816e+06	0	0	0	0	0	0	0	0	7060.34	3.74806e+06	6.29082e+07	4.21697e+07	3815.08
380	0	0	0	0	0	0	0	4.05784e+07	3.5782e+07	1.93103e+07	2.44322e+07	1.44556e+06	0	0	0	0	0	0	0	0	1.91926e+06	5.10621e+07	0	0	0	0	0	0	0	0	0	5.57225e+06	3.1029e+07	1.96397e+06	0	0
381	0	0	0	0	0	0	3.05747e+06	1.37985e+07	1.12749e+07	3.91381e+06	1100.77	0	0	0	0	0	0	0	0	685425	4.07978e+07	5.47879e+07	7.76383e+06	0	0	0	0	0	0	0	0	659975	3.17138e+07	4.57919e+07	2.68581e+06	0
382	0	0	0	0	0	0	0	0	0	0	0	0	0	0	0	0	0	0	0	1.21717e+07	7.49559e+06	3.356e+07	1.64715e+07	3817.02	826638	0	0	0	0	0	6.10544e+06	5.57847e+06	3.81896e+07	6.44955e+07	2.10082e+07	0
383	0	0	0	0	0	0	0	0	15357.7	0	0	0	0	0	0	0	0	0	0	2.00252e+07	5.31649e+07	4.23071e+07	1.51449e+07	7589.68	0	60499.1	0	0	0	9.12676e+06	2.19321e+07	8.50499e+07	6.43225e+07	3.16784e+07	7.62608e+06	0
384	0	0	0	0	0	0	0	0	0	0	0	0	0	0	0	0	0	0	0	3.74302e+06	1.66125e+07	1.65878e+07	2.90012e+06	5.29071e+06	0	0	0	0	0	0	652991	2.7686e+07	6.61352e+07	7.00138e+07	14649.5	0
385	0	0	0	0	0	0	3.1991e+07	643559	0	0	0	0	0	0	0	0	0	0	0	0	8.59859e+06	3.2699e+07	0	0	0	0	0	0	0	0	0	2.44213e+06	2.08642e+07	6.60082e+07	1.39378e+06	0
386	0	0	0	0	0	0	9.30165e+06	1.1874e+07	4.74014e+07	1.16959e+07	23165	0	0	0	0	0	0	9.10792e+06	7.33294e+07	9.9133e+07	5.2079e+07	4.73368e+07	805623	11262.7	47571.1	702170	0	0	0	0	0	637891	5.00943e+06	3659.67	0	0
387	0	0	0	0	0	0	0	4.98034e+06	1.29274e+06	0	0	0	0	0	0	0	0	0	0	0	1.29157e+06	9.72792e+06	0	0	0	4910.02	0	0	0	0	8.4796e+06	2.67619e+07	6.35306e+07	5.05758e+07	1.37192e+07	5.60665e+06
388	0	0	0	0	0	1155.16	1.2787e+06	2.5595e+06	4.27392e+07	3.98595e+07	0	0	0	0	0	0	0	15135.3	156543	6.80781e+07	8.24766e+07	1.0673e+08	2.15284e+07	0	0	0	0	0	0	0	0	1.73618e+07	5.03374e+07	2.2972e+07	0	0
389	0	0	0	0	0	0	0	0	0	0	0	0	0	0	0	0	0	0	0	0	0	0	0	0	0	0	0	0	0	2.44878e+06	2.46548e+06	25766.6	1.35618e+07	0	0	0
390	0	0	0	0	0	0	0	0	0	0	0	0	0	0	0	0	0	0	0	0	0	0	0	0	0	0	0	0	0	144184	4.29809e+07	5.44269e+07	7.06627e+07	8.52229e+07	2.99135e+07	2.79285e+07
391	0	0	0	0	0	0	0	0	0	0	0	0	0	0	0	0	0	0	0	1168.9	16481.9	0	0	0	0	0	0	0	0	0	4.8925e+06	1.85083e+07	5.65749e+07	6.52984e+07	6.03288e+06	132892
392	0	0	0	0	0	0	625686	3.34224e+07	6.26008e+07	3.84602e+07	5.92769e+06	11284.1	0	0	0	0	0	628704	6.6668e+06	2.81238e+07	8.52874e+07	2.0791e+07	845019	0	0	0	0	0	0	0	7000.63	1.86959e+07	5.4935e+07	8.06824e+07	7.7157e+06	724223
393	0	0	0	0	0	0	0	0	2.78166e+07	2.97509e+07	1.37997e+06	0	0	0	0	0	0	0	0	6.22245e+06	9.03507e+07	3.2906e+07	8.28299e+06	0	0	0	0	0	0	0	0	6.7907e+06	3.53948e+07	3.44223e+07	3692.26	0
394	0	0	0	0	0	1.25681e+06	4.72021e+07	6.32489e+07	6.33642e+07	1.51644e+07	10942.6	0	0	0	0	0	0	0	0	0	0	0	0	0	0	0	0	0	0	2309.69	1.29255e+06	2.67419e+07	4.94795e+07	7.86486e+07	1.3163e+06	3.35952e+06
395	0	0	0	0	0	0	15076	1.24434e+07	4.93812e+06	0	0	0	7345.72	0	0	0	0	3.03498e+06	4.34134e+07	9.0081e+07	4.34629e+07	8.38499e+07	8.00376e+06	11283	0	0	0	0	0	0	10498.5	0	0	670893	678050	0
396	0	0	0	0	0	0	0	0	0	3667.13	60518	0	0	0	0	0	0	639393	5.4892e+06	5.33538e+07	7.10101e+07	5.46395e+07	4.0051e+06	1134	704928	60473.8	0	0	0	0	6996.34	1.90268e+07	2.49367e+07	8.24516e+06	0	0
397	0	0	0	0	0	0	0	0	0	0	0	0	0	0	0	0	0	15121.9	9.25234e+06	4.97774e+07	7.68721e+07	8.84088e+07	2.20124e+07	753501	0	0	0	0	0	1155.09	33330.1	4.13506e+07	5.9416e+07	5.8822e+07	1.17716e+07	4.24153e+06
398	0	0	0	0	0	0	0	7059.72	0	0	0	0	0	0	0	0	0	0	0	1.93134e+06	3.34554e+07	0	0	0	0	0	0	0	0	0	6995.63	1.27677e+07	5.1644e+07	6.52561e+07	660178	0
399	0	0	0	0	0	0	3505.68	0	0	0	0	0	0	0	0	0	0	1154.9	1.66684e+07	4.82303e+07	5.56261e+07	2.09568e+07	10931.5	0	0	0	0	0	20008.4	957707	3.40546e+07	1.246e+07	5.79615e+07	7.10434e+07	2.55188e+06	0
400	0	0	0	0	0	0	8.56622e+06	1.09137e+08	6.4132e+07	4.19955e+07	7.39135e+06	0	0	0	0	0	9114.82	1153.28	2.86637e+07	5.12554e+07	7.22834e+07	5.57156e+07	2.59673e+06	0	705941	0	0	0	0	0	0	4.92342e+06	4.4199e+07	4.47579e+07	1.87548e+07	0
401	0	0	0	0	0	0	0	0	0	0	0	0	0	0	0	0	0	0	0	0	0	0	0	0	0	0	0	0	0	0	0	7034.24	3541.34	0	0	0
402	0	0	0	0	0	0	0	0	0	0	0	0	0	0	0	0	0	3.052e+06	3.1277e+07	3.17281e+07	5.50751e+07	4.29726e+07	1.33544e+07	3.33364e+06	0	0	0	0	0	0	0	673677	6.22799e+07	3.17253e+07	2.58641e+06	0
403	0	0	0	0	0	0	0	0	9.63988e+06	1.54176e+07	0	0	0	0	0	0	0	0	0	31805.5	1.99833e+07	0	0	0	0	0	0	0	0	0	3.66813e+06	3.53239e+07	3.05526e+07	7.3964e+07	2.20161e+07	3805.78
404	0	0	0	0	0	0	0	0	0	0	0	0	0	0	0	0	0	0	659796	1.32994e+07	3.92381e+07	3.61674e+07	0	725056	0	0	0	0	0	0	0	0	3.20685e+07	4.6195e+07	3.99562e+06	724205
405	0	0	0	0	0	0	0	0	0	0	0	0	3.06169e+06	737353	2.51296e+06	643931	8253.79	2.42834e+06	3.6751e+06	5.66778e+06	1.25986e+07	0	0	0	0	0	0	0	0	0	3497	3.23492e+07	6.57351e+07	7.22574e+07	29109.9	0
406	0	0	0	0	0	6975.22	0	7060.96	682545	0	0	0	0	0	0	0	0	0	9.88886e+06	4.29331e+07	6.00877e+07	4.38111e+07	1.23676e+07	0	12096.3	0	0	0	0	0	9.71397e+06	2.32631e+07	3.7276e+07	5.26981e+07	666435	0
407	0	0	0	0	0	0	3498.12	1.96346e+07	2.5345e+07	4.80765e+07	1.36866e+07	1130.46	0	0	0	0	0	0	0	0	0	0	0	0	0	0	0	0	0	625079	1.45823e+07	3.03661e+07	3.84056e+07	7.33261e+07	1.61363e+07	0
408	0	0	0	0	0	0	3.05526e+06	2.46876e+06	1.11646e+07	5.73657e+06	0	0	0	0	0	0	0	0	0	636034	24734.8	0	0	0	0	0	0	0	0	0	2.42031e+06	3.13502e+07	5.28929e+07	8.2053e+07	4.71023e+07	5.22106e+06
409	0	0	0	0	0	626235	1.14873e+07	2.34585e+07	1.58524e+06	0	0	0	0	0	0	0	0	8.71405e+06	0	3.92174e+07	5.09091e+07	3.90016e+07	2.11373e+06	0	0	0	0	0	0	0	1.27319e+06	1.34603e+06	5.21005e+07	2.73498e+07	0	0
410	0	0	0	0	0	0	0	0	0	0	0	0	0	0	0	0	0	0	0	3553.5	2.03141e+07	9.89421e+07	4.10687e+07	4.83852e+06	2.55514e+06	1.44086e+06	0	10707.8	3.12685e+06	2308.69	3.67727e+06	3.11142e+06	3.80208e+07	4.82263e+07	141069	2.65029e+06
411	0	0	0	0	0	0	0	0	0	0	0	0	0	0	0	0	0	0	0	636288	1.05349e+07	149347	0	0	0	0	0	0	0	0	626196	2.45349e+06	4.32608e+07	8.21739e+07	9.55092e+06	0
412	0	0	0	0	0	0	0	1.61897e+07	8.34304e+07	4.48845e+07	77285	0	0	0	0	0	0	9.06198e+06	7.03904e+07	8.67159e+07	6.66523e+07	6.44523e+07	1.68664e+07	2.198e+06	0	0	0	0	0	0	630881	3.98565e+07	6.12279e+07	5.7102e+07	2.56593e+06	0
413	0	0	0	0	0	0	2.42332e+06	1.76022e+07	5.02966e+06	0	0	0	0	0	0	0	0	0	0	4.0434e+07	5.05756e+07	7.30345e+07	910230	0	0	0	0	0	0	0	0	1.34667e+07	6.19686e+07	3.06762e+07	0	0
414	0	0	0	0	0	0	0	0	0	0	0	0	0	0	0	0	0	1.78567e+07	5.14203e+07	4.8456e+07	7.34369e+07	6.73215e+07	4.90657e+06	9.3397e+06	0	0	0	0	0	0	1.65035e+07	5.83674e+07	9.58732e+07	8.70027e+07	2.17805e+06	0
415	0	0	0	0	0	0	3.68858e+06	1.11189e+07	0	0	0	0	0	0	0	0	0	0	1.11174e+07	1.12535e+07	0	0	0	0	0	0	0	0	0	0	0	0	1.27678e+06	8504.57	0	0
416	0	0	0	0	0	0	1.52685e+07	5.85952e+07	7.00841e+07	2.97844e+07	2.8836e+07	2.21093e+06	0	0	0	0	0	0	0	0	6.23571e+06	2.77179e+07	749820	0	0	0	0	0	0	0	0	660502	3.13392e+06	4.58013e+07	1.12567e+07	0
417	0	0	0	0	0	0	3.09395e+06	3.45171e+07	5.97843e+07	672603	0	0	0	0	0	0	0	0	3492.4	4.97763e+06	7.93441e+07	4.70826e+07	0	0	0	0	0	0	0	0	3.04688e+06	7.41884e+06	2.84321e+07	2.5165e+07	0	0
418	0	0	0	0	0	0	0	1169.9	3.7211e+06	4.73517e+07	151452	0	0	0	0	0	0	0	0	0	3.26364e+06	2.30089e+07	0	0	0	0	0	0	0	0	0	2.46087e+06	4.36228e+07	2.19285e+07	1210.91	0
419	0	0	0	0	0	1.17731e+07	1.41624e+07	0	0	0	730267	0	0	0	0	0	0	0	0	0	0	0	0	0	0	0	0	0	0	0	8.53422e+06	1.74382e+07	5.65585e+07	9.06414e+07	2.43199e+07	7543.7
420	0	0	0	0	0	0	6954.51	3.75293e+06	8.61157e+07	1.47985e+07	0	0	0	0	0	0	0	0	0	0	6.90237e+06	6.39486e+07	3.86898e+06	0	0	0	0	0	0	1.25007e+06	2.07839e+07	2.45837e+07	4.62664e+07	6.9228e+07	5.15523e+06	0
421	0	0	0	0	0	0	0	0	15355.3	4.65168e+06	10936.7	0	0	0	0	0	0	0	3.05184e+06	3.57683e+07	8.10497e+07	5.09266e+06	3665.18	0	64139	0	0	0	0	0	9.65538e+06	2.60686e+06	3.37328e+07	4.65249e+07	419718	0
422	0	0	0	0	0	23191.4	3.33661e+07	2.30775e+07	1.31739e+07	3.08394e+07	0	0	0	0	0	0	0	8911.87	4.17446e+07	3.83955e+07	8.22989e+07	3.88775e+07	8.27672e+06	1.57244e+07	0	0	0	0	0	0	0	5.57605e+06	4.12045e+07	5.06542e+07	9454.16	0
423	0	0	0	0	0	0	0	15292.7	2.01136e+07	3.95158e+07	1.07485e+06	3.36079e+06	0	0	0	0	0	8.70964e+06	640786	1.13712e+07	4.30664e+07	2.51597e+06	0	0	0	0	0	0	0	0	0	2.46234e+06	3.96634e+07	4.37615e+07	7333.71	0
424	0	0	0	0	0	0	8.68507e+06	3.23044e+07	4.99688e+07	52047	0	0	2.71339e+06	0	0	0	0	15133.9	15082.7	15318.5	0	63764.9	0	0	0	0	0	0	0	0	1.77259e+07	4.89369e+07	7.16993e+07	4.76142e+07	729106	16490.5
425	0	0	0	0	0	0	0	0	0	2.5445e+06	0	0	0	0	0	0	0	628959	1.65169e+07	7.06822e+07	6.51482e+07	2.54393e+06	0	62463.8	0	0	0	0	0	0	17464.6	1.77415e+07	5.30166e+07	5.16536e+07	1.31504e+07	0
426	0	0	0	0	0	1.42398e+06	2.07939e+07	3.51613e+07	0	3667.02	47398.6	0	0	0	0	0	0	0	665922	4.56089e+07	6.48206e+07	7.97769e+07	2.38233e+06	5079.56	0	0	0	0	0	0	5.47432e+06	3.47757e+07	4.12083e+07	7.45185e+07	668633	687105
427	0	0	0	0	0	0	0	16497	22370	5.38893e+06	64212.3	0	60773.9	0	0	0	0	0	1.26536e+06	1.72388e+07	6.50829e+07	4.25784e+07	3.97862e+07	2.03673e+07	0	0	0	0	0	0	0	0	2.04631e+07	3.78208e+07	0	0
428	0	0	0	0	0	0	0	0	0	0	0	0	0	0	0	0	0	0	0	8.83008e+06	4.45959e+06	0	0	0	0	0	0	0	0	0	0	30589.7	5.301e+07	1.53031e+07	3.24642e+06	0
429	0	0	0	0	0	0	0	0	637112	2.60106e+06	2.12207e+06	0	0	0	0	0	0	0	0	0	665190	1.29878e+07	3.37517e+06	4.17316e+06	0	0	0	0	0	0	0	0	670999	4.23891e+07	5.61553e+07	1.15145e+07
430	0	0	0	0	0	0	0	0	0	0	0	0	0	0	0	0	0	0	0	0	9101.69	0	60518	0	0	0	0	0	0	0	3.07679e+07	5.03568e+06	5.65415e+07	4.48902e+07	734245	0
431	0	0	0	0	0	3.05857e+06	8.64625e+06	1.4976e+07	4.58429e+07	1.17929e+07	0	0	0	0	0	0	0	637123	1.77539e+07	3.24319e+07	0	0	0	0	1.44695e+06	0	0	0	0	635980	3.26918e+07	5.49394e+07	5.84465e+07	7.23409e+07	6.7696e+07	8.84518e+07
432	0	0	0	0	0	0	0	7051.23	1.71954e+07	3.80221e+06	0	0	0	0	0	0	0	0	0	5.50747e+06	3.84402e+07	3.01335e+07	2.72026e+06	1.53355e+06	0	0	0	0	0	0	9.34967e+06	5.31028e+07	1.89536e+07	9.88086e+06	3.19981e+06	0
433	0	0	0	0	0	0	0	0	4.36201e+06	3.83859e+06	7.38313e+06	0	0	0	0	0	0	0	0	7.37642e+06	2.63343e+07	2.21725e+07	0	0	0	0	0	0	0	0	0	6.22953e+06	3.53008e+07	2.85017e+07	0	1264.41
434	0	0	0	0	0	0	0	0	7.37246e+06	0	0	0	0	0	0	0	0	0	0	0	3561.68	47516.5	0	0	0	0	0	0	0	0	0	0	1.3979e+07	7.69479e+07	60511.7	0
435	0	0	0	0	0	0	1151.28	0	0	0	0	0	10993.6	0	0	0	0	16293.9	15080.3	4.23926e+07	6.60729e+07	2.05675e+07	2.07934e+06	0	0	0	0	0	0	2309.62	1.70884e+07	3.63546e+07	4.8404e+07	6.97254e+07	2.54927e+06	0
436	0	0	0	0	0	0	0	0	0	0	0	0	0	0	0	0	0	1.56252e+07	6.28315e+07	6.97853e+07	3.37789e+07	32876.2	0	0	0	0	0	0	0	0	0	1168.87	2.20007e+07	6.12234e+07	9.01091e+06	62470.1
437	0	0	0	0	0	629251	3.74601e+07	7.89906e+07	6.63992e+07	4.89447e+07	4.61971e+06	0	733712	0	0	0	0	0	0	1.78025e+07	3.03704e+07	8.84724e+06	662627	0	0	0	0	0	0	0	0	0	1.65785e+07	3.26337e+07	1.77876e+07	0
438	0	0	0	0	0	1.2558e+06	3.05811e+06	0	7058.06	1.51721e+06	702117	727441	0	0	0	0	0	1.88908e+06	3.31882e+07	7.18837e+07	8.24614e+07	3.84985e+07	0	48769.8	0	0	0	0	0	0	1.54487e+07	4.91005e+07	2.2435e+07	1.84034e+07	0	0
439	0	0	0	0	0	22087.9	1.62663e+07	6.33335e+07	6.18381e+07	2.54112e+06	0	0	0	0	0	0	0	1152.61	3.79806e+07	3.97762e+07	4.87675e+07	8.81288e+06	0	0	0	0	0	0	0	0	7.97795e+06	1.39204e+07	1.73497e+07	2.81695e+07	1.37378e+07	1.4771e+06
440	0	0	0	0	0	0	0	0	0	0	0	0	0	0	0	0	0	0	0	0	0	0	0	0	7352.55	7330.81	0	0	0	0	10467.6	2.77777e+07	7.30723e+07	7.43025e+07	773175	4.82536e+06
441	0	0	0	0	0	0	0	1165.95	3.96572e+07	2.31141e+07	1.89869e+07	0	0	0	0	0	0	0	0	0	4.37874e+06	1.84252e+07	7.74272e+06	2.77764e+06	0	0	0	0	0	658319	9.29336e+06	1.48896e+07	3.63491e+07	0	0	0
442	0	0	0	0	0	0	0	3.6972e+06	9.52337e+06	5.73867e+06	0	0	0	0	0	0	0	0	6.13869e+06	3.03063e+07	6.99544e+07	3.50003e+07	1.043e+07	151680	0	0	0	0	0	0	0	2.44833e+06	0	0	0	0
443	0	0	0	0	0	0	0	2.13938e+07	4.32265e+07	2.72703e+07	0	0	0	0	0	0	0	0	0	0	5.25561e+07	2.06673e+07	0	0	0	0	0	0	0	0	0	0	0	0	0	0
444	0	0	0	0	0	0	0	0	0	0	0	0	0	0	0	0	0	1.92811e+07	2.66952e+07	3.9995e+07	2.77479e+07	0	0	0	0	0	0	0	0	635952	5.05606e+07	1.8841e+07	4.11326e+07	6.06807e+07	0	0
445	0	0	0	0	0	0	0	0	0	666134	0	0	0	0	0	0	0	0	0	9.24523e+06	7.51203e+07	3.21741e+07	0	0	0	0	0	0	0	1.26915e+06	4.2e+07	1.75843e+07	6.42863e+07	6.95481e+07	3.01323e+07	81262.5
446	0	0	0	0	0	0	0	0	0	0	0	0	0	0	0	0	0	0	8.6822e+06	4.85231e+06	1.35606e+07	0	0	0	0	0	0	0	0	0	0	3.72062e+06	2.55199e+07	0	0	0
447	0	0	0	0	0	0	0	665756	5.2922e+07	1.08256e+07	2.56074e+06	0	0	0	0	0	0	2309.03	1.11746e+07	2.31718e+07	2.43312e+06	1.98978e+07	0	0	0	0	0	0	0	0	0	1.27293e+06	3.83093e+06	2.56482e+07	0	0
448	0	0	0	0	0	0	2.63743e+06	15328.1	0	0	0	0	0	0	0	0	0	0	0	0	0	1209.32	0	0	0	0	0	0	0	4.32788e+06	1.94218e+07	8.95007e+07	7.00738e+07	7.75338e+07	1.05145e+07	0
449	0	0	0	0	0	0	0	1.20096e+07	663541	0	0	0	0	0	0	0	0	0	0	0	0	15842.3	723026	0	0	0	0	0	0	0	625601	2.02257e+07	5.31611e+07	4.01173e+07	15957.1	11283
450	0	0	0	0	0	0	0	636171	4.16029e+07	1.07542e+07	3.50411e+06	3816	0	0	0	0	0	0	0	1.28738e+06	5.77878e+07	6.4567e+06	2.60617e+06	0	0	0	0	0	0	0	0	0	8237.37	0	7316.93	0
451	0	0	0	0	0	0	0	0	0	0	0	0	0	0	0	0	0	0	0	1.29271e+06	3.40449e+07	0	0	0	0	0	0	0	0	0	0	2.46394e+06	3.04927e+07	6.23627e+07	1.79672e+07	1.36923e+07
452	0	0	0	0	0	0	1.40641e+07	7.11965e+07	7.95197e+07	2.64546e+07	0	0	0	0	0	0	0	0	0	0	4.37609e+06	1.22187e+07	2.57239e+06	0	0	0	0	0	0	0	0	0	9095.72	1.28678e+07	2.67356e+06	0
453	0	0	0	0	0	644526	2.50919e+07	7.72025e+07	6.48305e+07	5.33196e+07	2.04104e+07	7.78772e+06	0	0	0	0	0	0	4.8428e+06	4.79336e+07	8.4408e+06	679415	0	0	0	0	0	0	0	0	0	7.40555e+06	5.94179e+07	6.99587e+07	2.22165e+07	0
454	0	0	0	0	0	0	1.25355e+06	0	0	0	0	0	0	0	0	0	0	0	0	0	0	657081	7289.18	0	0	0	0	0	0	0	0	8.11704e+06	3.59525e+07	1.94555e+07	0	0
455	0	0	0	0	0	0	0	0	0	0	0	0	0	0	0	0	0	0	0	0	0	0	0	0	0	730396	0	0	0	8.71468e+06	3497.81	4.93516e+06	8.11685e+06	5.81638e+07	4.65413e+07	1.49582e+06
456	0	0	0	0	0	0	0	0	0	0	0	0	0	0	0	0	0	0	0	0	0	0	0	0	0	0	0	0	0	0	13915.1	3.08104e+07	6.06222e+07	5.98942e+07	0	0
457	0	0	0	0	0	0	0	1166.91	4.94501e+06	1.69618e+07	0	0	0	0	0	0	0	0	0	4.94446e+06	3.79104e+07	1188.82	0	0	7.15504e+06	7285.66	0	0	0	0	8.69926e+06	3.73692e+07	8.53964e+07	6.49808e+07	1.51728e+07	0
458	0	0	0	0	0	0	0	0	0	657865	0	0	0	0	0	0	0	0	1.4764e+06	5.2166e+07	7.85161e+07	6.37228e+07	3.17787e+07	63037.9	0	0	0	0	642443	1.49066e+07	3.31631e+07	5.23196e+07	4.56478e+07	9.25725e+07	2.25784e+07	2.88768e+07
459	0	0	0	0	0	0	8.42348e+06	3.95505e+07	4.72484e+07	7.58879e+07	7.70531e+06	0	0	0	0	0	0	0	0	0	0	0	0	0	0	0	0	0	0	0	3497.81	1.38596e+07	3.52576e+07	5.7189e+06	0	0
460	0	0	0	0	0	1154.38	1.11017e+07	0	0	0	0	0	0	0	0	0	0	0	0	0	0	0	0	0	0	0	0	0	0	0	5.27325e+07	5.92786e+07	8.69834e+07	6.16162e+07	9.77159e+06	1.52386e+06
461	9.76219e+06	94344.6	0	0	0	0	0	0	15356.3	9403.72	0	0	0	0	0	0	0	0	5.42224e+07	7.31251e+07	9.81631e+07	6.93322e+07	2.15907e+07	2.78426e+07	0	0	0	0	0	0	0	3.09466e+06	0	0	2.56045e+06	0
462	0	0	0	0	0	0	0	0	2.73127e+07	2.46865e+07	4.0977e+06	0	0	0	0	0	0	0	0	0	2.48196e+06	2.18077e+07	0	0	0	3690.63	0	0	0	0	8.01563e+06	3.12323e+07	3.53568e+07	1.15256e+08	5.88831e+07	6.45238e+06
463	0	0	0	0	0	0	0	0	0	0	0	0	0	0	0	0	0	0	0	7061.37	1.66242e+07	4.75368e+07	3.47111e+06	16555.1	0	0	0	0	0	0	2.90218e+07	4.41586e+07	6.43611e+07	4.44555e+07	2.58207e+06	0
464	0	0	0	0	0	0	1.29528e+07	0	0	0	0	0	0	0	0	0	0	0	3492.5	7.99743e+06	0	0	0	0	0	0	0	0	0	0	0	9.45815e+06	6.86325e+07	6.94821e+07	1.34253e+06	0
465	0	0	0	0	5.71908e+06	3.15378e+07	4.57618e+07	1.15491e+08	8.76095e+07	6.74638e+07	6.58383e+06	0	0	0	0	0	0	0	0	1.30628e+06	4.70559e+07	2.88858e+07	0	0	9.36981e+06	0	650203	0	146033	5.83699e+06	4.32516e+07	3.26324e+07	6.8801e+07	6.57197e+07	2.84785e+07	3.66424e+06
466	0	0	0	0	0	0	0	0	0	0	0	0	0	0	0	0	0	0	0	14105.8	15348.2	0	0	0	0	0	0	0	0	0	0	0	0	0	0	0
467	0	0	0	0	0	0	1.91052e+06	5.29406e+07	4.60333e+07	5.20509e+06	0	0	0	0	0	0	0	0	0	0	0	0	0	0	0	0	0	0	0	0	9.65426e+06	0	0	0	0	0
468	0	0	0	0	0	0	0	0	0	0	0	0	0	0	0	0	0	0	626647	8.63822e+06	4.33403e+07	3.01637e+07	1.96967e+07	684831	0	0	0	0	0	1153.94	1.47479e+07	3.12081e+07	6.14325e+07	7.85903e+07	4.82881e+07	7.64841e+07
469	0	0	0	0	0	3515.8	0	1.25608e+07	1.74764e+07	1.79457e+07	0	0	0	0	0	0	0	0	1.7979e+07	2.57133e+06	5.48196e+07	6.69727e+07	7.93e+06	0	0	730174	0	0	0	0	0	0	5.59404e+06	5.88779e+07	1.71926e+07	1.54009e+06
470	0	0	0	0	0	4.31513e+06	1.65007e+07	1.3722e+07	7.03952e+07	2.55528e+07	2.93018e+06	0	0	0	0	0	0	771703	2.26962e+07	2.03249e+07	8.41941e+07	4.8858e+07	9.79025e+06	7591.33	0	0	0	0	0	0	6931.11	1.38794e+07	3.54168e+07	1.10027e+08	2.45959e+07	1.47117e+06
471	0	0	0	0	0	10114.4	6.82733e+06	8.86386e+07	9.10253e+07	1.71619e+07	0	0	0	0	0	0	0	0	165434	1.85016e+07	7.42421e+07	1.83647e+07	0	11280.3	0	0	0	0	0	0	27804.9	3.23088e+07	6.92246e+07	2.75564e+07	0	0
472	0	0	0	0	0	0	15082.7	0	0	0	0	0	0	0	0	0	0	0	0	0	0	0	0	0	0	0	0	0	0	3.05548e+06	3.90083e+07	5.78163e+07	6.77882e+07	5.07586e+07	2.5153e+06	0
473	71783.3	702081	0	0	0	0	0	0	0	0	0	0	0	0	0	0	0	628646	1.14644e+07	1.57369e+07	1.31817e+07	3.20969e+06	0	0	0	0	0	0	0	0	0	2.9002e+07	6.14192e+07	1.06363e+08	8.97682e+06	17821.2
474	0	0	0	0	0	0	0	0	0	0	0	0	0	0	0	0	0	0	0	0	2.46773e+06	9.54238e+06	0	0	0	0	0	0	0	0	2.42598e+06	3.76499e+06	3.96544e+07	61767.1	0	0
475	0	0	0	0	0	0	0	0	9.88038e+06	0	0	0	0	0	0	0	0	0	0	636171	0	0	0	0	0	0	0	0	0	0	0	4.90999e+06	3.68157e+07	5.68886e+07	9.60249e+06	0
476	0	0	0	0	639892	5.43379e+06	6.12218e+07	7.11747e+07	7.19375e+07	6.12151e+07	2.81932e+07	1.92289e+07	704433	0	0	0	0	0	0	3.09843e+07	5.0001e+07	3.7555e+07	1.46191e+07	753613	0	0	0	0	0	0	0	3.08769e+06	3.81325e+07	9.72718e+07	2.14591e+07	8.73939e+06
477	0	0	0	0	0	0	0	14122.2	0	0	0	0	0	0	0	0	0	1.77545e+07	2.2381e+07	6.5964e+07	3.32292e+07	9.82195e+06	4.04038e+06	0	0	0	0	0	0	0	10496.6	4.93618e+06	3.07775e+07	1.09889e+08	2.34935e+07	0
478	0	0	0	0	0	0	1.75925e+07	2.41519e+07	8.79981e+07	6.28895e+07	1218.59	0	0	0	0	0	0	0	0	5.21014e+06	2.15488e+07	3.4099e+07	0	0	0	0	0	0	0	0	20974.5	3.90982e+07	6.16511e+07	161132	0	0
479	0	0	0	0	0	1.2645e+06	5.01496e+07	2.17092e+07	1.10916e+07	3664.26	0	0	0	0	0	0	0	0	0	0	0	0	0	0	0	0	0	0	0	0	3504.66	651127	3.10552e+06	9.84746e+06	0	8722.15
480	0	0	0	0	0	0	0	0	0	2.12427e+07	1.63671e+06	750203	0	0	0	0	0	0	0	4.3738e+06	2.42227e+07	4.53415e+07	15961.9	0	0	0	0	0	0	0	0	0	15357.3	0	0	0
481	0	0	0	0	0	0	0	0	0	0	0	0	0	0	0	0	0	0	3.66587e+06	1.47376e+06	1.90637e+07	1.34005e+07	0	0	0	0	0	0	0	2.81375e+06	5.11406e+07	3.71764e+07	6.03028e+07	7.82549e+07	7.76062e+06	9852.6
482	0	0	0	0	0	0	630937	1.74364e+07	1.93907e+06	680900	10944	62474.9	0	0	0	0	0	288400	626148	3.47204e+07	1.05182e+07	656964	2.57221e+06	7592.58	0	0	0	0	0	0	0	42331.9	4.32593e+07	1.52983e+07	0	0
483	0	0	0	0	0	0	0	0	0	0	0	0	0	0	0	0	0	143189	629912	8.87189e+06	3.42243e+07	9.65746e+06	0	0	60784.9	0	0	0	0	0	1.59427e+07	2.23672e+07	1.17477e+07	0	0	0
484	0	0	0	0	0	0	0	0	0	0	0	0	47589.9	0	0	0	0	0	0	0	0	0	0	0	0	0	0	0	0	169609	3.16344e+07	1.38407e+07	3.88849e+07	825270	0	0
485	0	0	0	0	0	0	0	0	0	2.53562e+06	0	0	0	0	0	0	0	0	3.05224e+06	3.13436e+07	6.70496e+07	3.90951e+07	932739	5.77452e+06	0	0	0	0	0	0	0	0	9.87881e+06	2.71389e+07	7329.56	0
486	0	0	0	0	0	0	0	9.28101e+06	633537	38851	0	0	0	0	0	0	0	0	0	0	0	0	0	0	0	0	0	0	0	3459.27	1.99294e+07	7001.52	0	0	0	0
487	0	0	0	0	0	0	0	639856	636426	655749	4.44028e+06	752432	0	0	0	0	0	17433.5	1.77098e+07	3.99216e+06	3.41533e+07	2.13046e+07	1.44323e+07	62430.7	1104.49	0	0	0	0	642740	3.39083e+07	6.05375e+07	6.58361e+07	5.38294e+07	9.45785e+06	0
488	0	0	0	0	0	0	1.90647e+06	2.71006e+07	6.88317e+07	9.05332e+06	0	0	0	0	0	0	0	0	0	0	5.54943e+06	9.67705e+06	0	0	0	0	0	0	0	0	2.44741e+06	3.25538e+07	2.47963e+07	6.63477e+07	2.71102e+06	0
489	0	0	0	0	0	0	0	0	0	0	0	0	0	0	0	0	0	0	0	2.62906e+06	3.73893e+07	5.16108e+07	673654	11284.3	0	0	0	0	0	0	4.83894e+06	6.19462e+06	4.18517e+07	8.02885e+07	4.69707e+07	17421.3
490	0	0	0	0	0	0	0	0	3.7564e+06	1.45739e+07	0	0	0	0	0	0	0	0	0	0	0	0	0	0	60680.7	0	0	0	0	0	10501.8	2.50668e+07	3.89284e+07	8.24541e+07	9.57926e+06	7587.61
491	0	0	0	0	0	0	2.4231e+06	5.01798e+06	2.08076e+07	3.83888e+06	2.61058e+06	0	0	0	0	0	0	0	0	0	0	0	0	0	0	0	0	0	0	1.01124e+07	8.44133e+06	1.23493e+07	7.47778e+07	8.85577e+07	4.30456e+07	3.19865e+07
492	0	0	0	0	0	0	0	0	0	0	0	0	0	0	0	0	0	0	0	2.46682e+06	0	0	0	0	0	0	0	0	0	0	0	0	13816.8	673705	0	0
493	0	0	0	0	0	9.35751e+06	4.62122e+07	6.45169e+07	6.72778e+07	6.87388e+07	0	0	0	0	0	0	0	0	0	0	0	0	0	0	0	0	0	0	0	2308.95	2.66863e+07	3.76808e+07	4.38291e+07	7.1509e+07	3.97308e+07	3.09457e+07
494	0	0	0	0	0	0	0	1.29477e+06	5.50801e+06	4.00946e+06	0	0	0	0	0	0	0	0	0	0	1.04735e+07	0	0	0	0	0	0	0	0	0	18525.5	3.93779e+07	3.57632e+07	4.14965e+07	3.19368e+06	752709
495	0	0	0	0	0	0	0	0	0	0	0	0	0	0	0	0	0	0	0	5.03659e+06	1.01057e+07	0	0	0	0	0	0	0	0	1.25333e+06	1.51136e+07	1.76446e+07	5.27092e+07	1.40842e+07	8.00733e+06	0
496	0	0	0	0	0	0	0	0	3.06573e+07	6.38837e+07	6.87493e+06	15072.9	0	0	0	0	0	5.70234e+06	3.83865e+06	6.79106e+07	7.10493e+07	657552	0	0	0	0	0	0	0	24093.2	1.21172e+07	3.11226e+07	6.72553e+07	6.68063e+07	3.63145e+07	0
497	0	0	0	0	0	0	15088.4	4.54718e+06	4.13618e+07	2.90267e+07	2.15832e+06	0	0	0	0	0	0	0	20829.5	1.63229e+07	2.4394e+07	4.35827e+07	0	0	0	0	0	0	0	0	9.88179e+06	3.87541e+07	7.62918e+07	7.01075e+07	3689.3	0
498	0	0	0	0	0	0	0	23401.3	1.29834e+06	0	730543	0	0	0	0	0	0	0	0	0	4.74003e+07	6.2844e+07	34454.8	0	0	0	0	0	0	0	4.85053e+06	6.12805e+06	4.64112e+07	651045	0	0
499	0	0	0	0	0	636235	2.019e+07	7.44185e+07	9.56919e+07	4.64419e+07	2.73643e+07	7.58077e+06	0	0	0	0	0	0	17493.9	6.36507e+07	5.02876e+07	7.00478e+07	0	0	0	0	0	0	0	7.41182e+06	4.04097e+07	4.31961e+07	3.98878e+07	7.55438e+07	3.54415e+07	0
500	0	0	0	0	0	0	0	4.95305e+06	4.50544e+07	4.9911e+07	3.03714e+06	2.65103e+06	0	0	0	0	0	0	0	2.29544e+07	5.4041e+07	9.36924e+07	7.43225e+06	7556.75	0	0	0	0	0	0	0	38811.9	3.89458e+07	4.76036e+07	8.49131e+06	0
501	0	0	0	0	0	0	0	17599.1	4.12198e+07	3.8876e+07	2.99019e+06	0	0	0	0	0	0	0	1.05721e+07	2.88909e+07	6.94127e+07	7.60541e+07	4.55597e+07	2.98165e+07	0	0	0	0	0	0	0	0	1.69023e+07	5.76484e+07	1.59381e+07	6.87969e+06
502	0	0	0	0	0	0	0	2.32817e+07	4.01938e+07	2.53857e+06	0	0	0	730451	70267.4	0	0	3.68111e+06	4.7275e+07	6.89444e+07	7.35368e+07	3.5691e+07	17174.1	0	0	0	0	0	9111.54	9.03016e+06	2.96381e+07	4.87804e+06	0	1209.36	0	0
503	0	0	0	0	0	2.48017e+06	5.59944e+07	3.12787e+07	5.05073e+07	1.90021e+07	1.30377e+07	0	0	0	0	0	0	0	0	2.02365e+07	5.04899e+07	9.21711e+06	10947.5	0	0	0	0	0	0	0	0	0	6.19557e+06	0	3686.95	0
504	0	0	0	0	0	0	0	0	0	0	0	0	0	0	0	0	0	639660	6.75718e+06	1.03485e+08	7.83328e+07	7.03676e+07	60200.5	0	0	0	0	0	0	0	638889	6.10046e+06	6.91752e+07	4.03121e+07	7.35715e+06	0
505	0	0	0	0	0	0	0	0	0	0	0	0	0	0	0	0	0	0	0	2.51181e+07	9.36879e+06	32798.2	14617.1	0	0	0	0	0	0	0	0	695000	2.36099e+07	3.36059e+07	0	0
506	0	0	0	0	0	0	1.25701e+06	4.41641e+07	7.63225e+07	2.41256e+07	18325.5	772872	0	0	0	0	0	0	0	0	0	0	0	0	0	0	0	0	0	15132.9	8.68347e+06	3.33829e+07	6.1239e+07	5.34687e+07	1.68292e+07	1.09999e+07
507	0	0	0	0	0	0	625667	657991	1.92438e+06	0	0	0	0	0	0	0	0	0	0	0	0	0	0	0	3.2367e+06	0	7200.13	0	0	0	0	8.8505e+06	2.47894e+06	0	0	0
508	0	0	0	0	0	0	625530	16463.6	2.5593e+07	3.83536e+06	0	0	0	0	0	3.1339e+06	709883	3.91962e+07	2.6858e+07	2.55036e+07	7.98593e+07	1.00013e+08	3.69361e+07	16548.9	2.14703e+06	0	0	0	0	0	0	2.54127e+07	6.84844e+07	4.3483e+07	0	0
509	0	0	0	0	0	0	0	3.04326e+07	8.62475e+06	9.21474e+06	0	0	0	0	0	0	0	0	0	1.06976e+07	4.77354e+07	5.77766e+07	1.20555e+07	73726.9	0	0	0	0	0	0	0	0	1.25894e+07	1.07555e+07	0	0
510	0	0	0	0	0	0	7.28088e+06	2.05184e+07	4.85522e+07	3.68645e+07	3692.57	0	0	0	0	0	0	0	0	0	4.98066e+06	5.00914e+07	78497.6	0	0	0	0	0	641137	671948	1.45644e+07	3.22035e+06	8.68519e+06	4.62684e+07	0	0
511	0	0	0	0	0	2.43306e+06	2.68895e+07	7.07038e+07	7.1693e+07	2.64005e+07	2.90108e+07	4.92191e+06	0	0	0	0	0	0	0	0	0	0	0	0	0	0	0	0	0	0	0	1.12634e+07	2.95294e+07	1.42511e+07	2.58911e+06	0
512	0	0	0	0	0	0	0	0	0	0	0	0	0	0	0	0	14145.3	1.49542e+07	2.60077e+07	9.17137e+07	7.059e+07	5.79095e+07	1.85431e+07	0	0	0	0	0	0	0	4.28799e+06	3.62211e+07	4.79527e+07	1.46243e+07	0	0
513	0	0	0	0	0	0	0	0	0	696271	8.80326e+06	1132.59	0	0	0	0	0	2.4451e+06	2.69856e+07	6.15307e+07	6.84886e+07	4.45587e+07	1.46362e+06	0	0	0	0	0	0	0	2.42938e+06	1.26283e+07	2.61608e+07	5.7024e+07	1.83636e+07	4.17699e+06
514	0	0	0	0	0	0	0	4.91532e+06	0	0	0	0	3.30722e+06	2.20582e+06	5.38304e+06	6.28942e+06	2.58518e+06	5.62517e+06	3.1094e+06	735322	1.10959e+07	4.52811e+06	60469	0	0	0	0	0	0	0	0	0	0	0	0	0
515	0	0	0	0	0	0	2.41698e+06	1.20016e+07	2.58483e+06	0	0	0	0	0	0	0	0	0	0	0	2.54438e+06	4.49198e+06	0	0	0	0	0	0	0	0	3501.9	1.0404e+07	3.095e+07	4.55621e+06	0	0
516	752349	0	0	0	0	0	3.04477e+06	1.25643e+07	0	0	0	0	0	0	0	0	0	0	7011.46	2.70041e+06	0	0	0	0	0	0	0	0	0	0	0	660858	1.27117e+06	673047	0	0
517	0	0	0	0	0	0	0	0	0	0	0	0	0	0	0	0	0	0	0	0	0	0	0	0	0	0	0	0	0	0	0	0	0	0	0	0
518	0	0	0	0	0	0	0	0	1.00017e+07	1.48661e+07	0	0	0	0	0	0	0	0	0	0	1.10878e+07	4.67742e+07	6.36981e+06	0	0	0	0	0	15375.9	2.53925e+06	0	0	2.39849e+07	7.50305e+07	2.57159e+06	0
519	0	0	0	0	0	0	0	0	0	0	0	0	0	0	0	0	0	2.03157e+06	1.82687e+07	8.5189e+07	7.32682e+07	8.45973e+07	1.23994e+07	0	0	0	0	0	1170.68	2.98213e+07	4.07334e+07	5.09418e+07	4.51832e+07	7.82165e+07	2.12102e+07	5.29e+06
520	0	0	0	2.48941e+06	784879	3.0008e+07	5.55064e+07	9.25902e+06	3.09268e+06	3.34439e+06	3.88393e+06	15166.5	0	0	0	0	0	0	0	636778	1.58763e+07	1.54356e+07	0	0	0	0	0	0	0	0	0	29425.7	1.66543e+07	2.93214e+07	9.24996e+06	73227.1
521	0	0	0	0	0	0	15085.1	12582.5	2.63163e+07	5.8226e+07	2.33942e+07	1.58403e+06	0	0	0	0	0	0	0	0	0	0	0	0	0	0	0	0	0	0	0	15323.8	3.02304e+07	5.25689e+07	1.8029e+07	0
522	0	0	0	0	0	0	0	0	0	0	0	0	6.57923e+06	0	0	3593.04	0	0	0	0	0	5.09948e+06	1.45306e+06	3814.16	0	0	0	0	0	639027	644045	4.00689e+07	4.78805e+07	5.44105e+07	63292.6	2.6528e+06
523	0	0	0	0	0	0	2.42832e+06	3.04484e+07	7.24277e+07	5.50712e+07	1.49171e+06	0	0	0	0	0	0	0	0	0	0	0	0	0	0	0	0	0	0	628879	9.65873e+06	2.44467e+06	0	0	7333.29	0
524	0	0	0	0	0	0	0	0	1.10861e+07	3.99836e+07	2.37803e+07	143233	0	0	0	0	0	0	10452.4	2.66115e+07	4.49188e+07	1.04449e+07	0	0	0	0	0	0	0	0	0	1.93786e+07	7.84282e+07	1.07389e+08	9.66918e+06	0
525	0	0	0	0	0	0	1.2644e+06	1165.91	3.91653e+06	0	0	0	0	0	0	0	0	0	0	7035.9	0	0	0	0	0	0	0	0	0	0	0	0	0	0	0	0
526	0	0	0	0	0	0	0	0	0	0	0	0	0	0	0	0	0	0	0	636191	17688.9	1203.96	0	0	0	0	0	0	0	0	0	0	0	0	0	0
527	0	0	0	0	0	0	1.53886e+07	1.25135e+07	2.2975e+07	1.28954e+07	0	0	1.44856e+07	663779	5.20682e+06	1.64404e+07	3.62701e+07	5.57829e+07	8.54345e+07	5.07062e+07	7.31324e+07	6.99017e+07	1.98532e+07	1.49202e+06	0	0	0	0	0	0	0	3.25348e+06	5.00134e+06	3.19405e+07	7.41045e+06	7.85684e+06
528	0	0	0	0	0	0	0	2.05822e+07	4.70272e+07	1.37513e+07	669777	0	0	0	0	0	0	0	0	1.97842e+07	4.11352e+07	1.17099e+07	2.75445e+06	62184.3	0	0	0	0	0	15114.2	2.13539e+07	8.24334e+06	5.83384e+07	6.98469e+07	0	0
529	0	0	0	0	0	0	1.24498e+06	6.84148e+06	2.73415e+07	1.04988e+07	0	0	2.56738e+06	1.45768e+06	3.81727e+06	4.97776e+06	653713	2.19584e+07	7.39273e+07	8.13448e+07	6.88333e+07	6.31365e+07	1.02788e+07	70012.8	0	0	0	0	0	0	1.09101e+07	7.061e+07	3.76233e+07	7.34379e+07	3.25577e+06	0
530	0	0	0	0	0	0	0	22432	2.57674e+07	4.45007e+07	2.70291e+07	2.6598e+06	5.14642e+06	0	0	0	0	0	0	0	0	0	0	0	0	0	0	0	0	1154.42	9.09043e+06	5.71636e+07	7.90841e+07	9.90936e+07	3.57812e+07	69888.4
531	0	0	0	0	0	2.43387e+06	626425	2.66194e+07	3.65236e+07	44953.2	0	0	0	0	0	0	0	0	0	0	0	7.13744e+06	1.42396e+06	0	1.60957e+06	806134	7249.44	21398.5	15377.8	0	0	0	0	0	0	0
532	0	0	0	0	0	0	0	0	0	0	0	0	0	0	0	0	0	0	0	0	0	0	0	0	0	0	0	0	0	0	1.24777e+06	1.48732e+07	6.21085e+07	5.57065e+07	875158	0
533	0	0	0	0	0	0	0	0	650822	6.47569e+06	24033	0	0	0	0	0	0	9.33589e+06	0	9.46984e+06	3.5693e+07	3.52875e+06	0	0	0	0	0	0	0	0	0	639740	3.19784e+06	3.10783e+07	18245.5	3816.31
534	0	0	0	0	0	628704	5.44705e+06	2.30303e+07	6.47953e+07	3.8424e+07	16992.7	0	0	0	0	0	0	0	0	6.3703e+06	2.50653e+06	666890	0	0	0	0	0	0	0	0	0	0	4.37823e+06	8.86855e+06	0	0
535	0	0	0	0	0	0	3505.68	0	0	0	0	0	0	0	0	0	0	0	15051.6	1.77784e+07	3.94122e+07	3.52793e+07	8.75373e+06	2.64351e+06	0	0	0	0	0	0	0	2.86543e+07	3.39464e+07	4.72933e+07	15757.6	0
536	0	0	0	0	0	0	0	0	0	0	0	0	0	0	0	0	0	0	0	2.71569e+07	5.54378e+07	2.57928e+07	71055.6	0	0	0	0	0	0	0	18583.8	2.44764e+07	6.84732e+07	9.04826e+07	3.98924e+07	7.07478e+06
537	0	0	0	0	7059.92	5.38066e+07	7.75775e+07	8.93824e+07	4.38143e+06	18135.6	0	0	0	0	0	0	0	2.52302e+06	5.43785e+07	1.09506e+08	5.40428e+07	4.06655e+07	1.17711e+07	0	0	0	0	0	0	24078.3	1.33246e+07	3.09529e+07	3.64722e+07	7.12542e+07	0	0
538	0	0	0	0	0	0	6.10073e+06	6.38533e+06	4.4401e+07	2.50689e+07	2.1475e+06	7579.74	0	0	0	0	0	0	0	0	0	0	0	0	0	0	0	0	0	627862	1.8294e+07	3.31432e+07	3.23457e+07	8.1052e+07	6.05415e+07	1.31794e+07
539	0	0	0	0	0	0	0	0	0	0	0	0	0	0	0	0	0	1.26214e+06	2.22955e+07	2.62175e+07	6.79626e+07	5.21465e+07	1.06964e+07	2.65032e+06	0	0	0	0	0	0	0	0	1.48145e+07	1.79704e+07	683404	0
540	0	0	0	0	0	0	0	0	0	0	0	0	0	0	0	0	0	0	0	1.80902e+07	3.43469e+07	2.40218e+07	5.37958e+06	0	0	0	0	0	0	0	0	4.9306e+06	3.55328e+07	1.61346e+07	7323.14	0
541	0	0	0	0	0	0	0	0	1.80931e+07	3.1704e+07	4.54098e+06	0	0	0	0	0	0	0	0	2.46485e+06	2.66828e+07	1.23743e+07	1.27133e+07	0	0	0	0	0	0	1.26589e+06	1.58752e+07	6.19251e+07	5.719e+07	5.95148e+07	9.0353e+06	0
542	0	0	0	0	0	0	0	0	0	0	0	0	0	0	0	0	0	0	3.65945e+06	1.44162e+07	6.59832e+07	9.62837e+07	4.9228e+06	9.66115e+06	0	0	0	0	0	629506	3.08523e+07	8.21977e+07	6.27882e+07	6.63261e+07	2.90857e+07	2.63708e+07
543	0	0	0	0	0	0	0	0	0	0	0	0	0	0	0	0	0	0	0	0	2.94696e+07	1.48398e+07	704287	12623.3	0	0	0	0	0	628352	1.34928e+07	2.61466e+07	4.10386e+07	7.53619e+07	3.2387e+07	16552.7
544	0	0	0	0	0	0	1.41239e+07	1.89926e+07	8.17284e+07	6.65731e+07	2.08709e+06	72039.6	0	0	0	0	0	0	0	0	0	0	0	0	0	0	0	0	0	16284.1	1.72632e+07	6.92935e+07	2.94744e+07	2.73891e+07	773428	11448.4
545	0	0	0	0	0	0	0	0	0	0	0	0	0	0	0	0	0	0	0	0	0	0	0	0	0	0	0	0	0	0	636019	1.03827e+07	2.66484e+07	5.64919e+07	6.15668e+06	20336.2
546	0	0	0	0	0	0	0	0	0	0	0	0	0	0	0	0	0	0	0	0	0	0	1.49095e+06	0	0	0	0	0	0	0	0	1.2726e+06	2.23753e+07	6.09619e+07	4.10412e+07	2.30069e+06
547	0	0	0	0	0	0	0	0	5.55961e+06	0	0	0	0	0	0	0	0	0	1.86698e+07	2.81778e+07	2.61545e+07	2.0124e+07	0	0	0	0	0	2.48838e+06	3.13088e+06	2.47237e+07	3.01014e+07	3.38996e+07	6.88818e+07	5.61414e+07	730359	9.65113e+06
548	0	0	0	0	0	0	13909.6	5.14751e+06	3.83861e+07	0	0	786589	0	0	0	0	0	0	0	4.11967e+07	9.5853e+06	0	0	0	0	0	0	0	2342.83	1.50665e+07	2.04588e+07	5.50634e+07	1.01091e+08	8.39225e+07	1.01687e+07	0
549	0	0	0	0	0	0	0	0	1.66019e+07	3.96105e+07	10919.1	686027	0	0	0	0	0	0	15075	2.08549e+07	9.09827e+07	4.72702e+07	1.42623e+07	8719.55	0	0	0	0	0	0	0	9.47307e+06	1.19147e+07	1208.92	0	0
550	0	0	0	0	0	0	0	0	0	15807.9	0	0	0	0	0	0	1173.67	9.86852e+06	8.50146e+07	7.37383e+07	4.59366e+07	5.26099e+07	2.61199e+07	6.99195e+06	0	0	0	0	0	8966.79	3505.78	2.47953e+06	2.38583e+07	8.18821e+07	4.41067e+07	1.61921e+07
551	0	0	0	0	0	0	0	636739	0	0	77222.1	15182.9	0	0	0	0	0	655044	0	0	9.82609e+06	3.86581e+07	0	0	0	0	0	0	0	0	0	3546.45	7.37136e+06	9.85371e+06	701657	0
552	0	0	0	0	0	0	636069	1.0552e+07	2.82183e+07	1.53797e+07	0	1133.65	0	0	0	0	0	2.43188e+06	3.04683e+06	2.66015e+07	3.10367e+06	658022	0	0	0	0	0	0	0	0	796982	4.31141e+07	7.17321e+07	7.12849e+07	1.81886e+07	1.77069e+07
553	0	0	0	0	0	2309.62	3.11444e+06	1.60148e+07	1.73804e+07	660550	0	0	0	0	0	0	0	12453.2	3.826e+06	6.0275e+07	5.30485e+07	8.3042e+06	0	0	0	0	0	0	0	0	1.17211e+07	3.6366e+07	8.38555e+07	4.36318e+07	5.1807e+06	4.16106e+06
554	0	0	0	0	0	0	0	0	0	0	0	0	0	0	0	0	0	0	0	1169.68	8.07686e+06	1.02692e+07	0	0	0	0	0	0	0	0	0	1.84221e+07	3.7406e+06	1.36801e+07	67883.7	0
555	0	0	0	0	0	0	0	26443.5	0	0	0	0	0	0	0	0	0	0	0	1.29925e+06	649556	0	0	0	0	0	0	0	0	0	41771.7	2.37096e+07	5.67256e+07	1.67754e+07	7.00225e+06	0
556	0	0	0	0	0	0	0	0	0	0	0	0	0	0	0	0	2.44539e+06	5.54955e+06	8.15163e+07	5.00941e+07	4.88121e+07	3.71396e+07	4.0009e+06	0	0	0	0	0	0	937058	2.38942e+07	3.37707e+07	4.64192e+07	5.03385e+07	2.56313e+06	0
557	0	0	0	0	0	0	0	0	6.77365e+06	2.51042e+06	0	0	0	0	0	0	0	0	1.00589e+07	3.11766e+07	2.54188e+07	0	26886.9	0	0	0	0	0	0	0	7.87982e+06	4.8262e+07	6.53267e+07	3.11342e+07	9.16034e+06	29185.2
558	0	0	0	0	0	0	646026	0	0	0	0	0	0	0	0	0	0	0	0	0	0	0	0	0	11038.2	0	0	0	0	0	0	0	0	0	0	0
559	0	0	0	0	0	0	0	15327.6	4.36517e+06	726316	61615.1	0	0	0	0	0	0	0	3.66514e+06	644042	0	0	0	0	0	0	0	0	0	2310.1	4.871e+06	5.66077e+06	4.68949e+07	5.56562e+07	3685.52	0
560	0	0	0	0	0	0	0	0	0	0	0	0	0	0	0	0	0	0	0	1.74915e+07	8.86783e+07	3.60028e+07	94699.1	0	0	0	0	0	0	0	2.25165e+07	4.72217e+07	5.08081e+07	2.46378e+07	3.23838e+06	0
561	0	0	0	0	0	0	1.79512e+07	3.44945e+07	6.08107e+07	3.33367e+07	3.10504e+06	0	1.03617e+07	701215	0	0	0	0	1.28249e+06	4.40846e+06	3.9093e+07	7.10315e+06	0	0	0	0	0	0	0	0	8.68866e+06	2.41933e+07	3.07403e+07	8.36967e+07	2.55959e+06	2.65184e+06
562	0	0	0	0	0	0	0	8.03519e+06	0	657826	3692.47	0	0	0	0	0	0	0	0	0	0	0	2.21013e+06	724223	0	0	0	0	0	0	0	0	31654.9	0	0	0
563	0	0	0	0	0	0	0	0	0	0	0	0	0	0	0	0	0	1.42522e+07	2.56544e+07	4.05656e+07	7.24447e+07	5.93538e+07	0	0	0	0	0	0	0	0	1.10167e+07	2.27453e+07	3.5211e+07	8.49778e+07	4.14056e+06	2.86079e+07
564	0	0	0	0	0	0	1.89967e+06	6.80418e+06	0	7.25526e+06	2.53308e+06	12303.7	0	0	0	0	0	16280.8	4.20766e+07	6.34683e+07	7.5473e+07	7.62941e+07	2.08136e+07	0	0	0	0	0	0	0	0	2.78834e+07	9.18279e+07	4.84849e+07	3637.39	0
565	0	0	0	0	0	0	2.43134e+06	0	1.3724e+07	1208.55	0	0	0	0	0	0	0	0	0	5875.12	3.00284e+07	1.95054e+07	661881	0	0	0	0	0	0	0	2.41602e+06	1.6759e+07	4.17446e+07	6.60153e+07	2.92198e+07	0
566	0	0	0	0	0	0	5.51332e+06	3.17377e+07	8.59685e+06	0	0	0	0	0	0	0	0	0	0	636328	0	0	0	0	0	0	0	0	0	143078	2.14082e+07	1.65815e+07	5.58917e+07	7.46843e+07	1.44053e+07	0
567	0	0	0	0	0	15138.6	3.65809e+06	1.84539e+07	6.54165e+07	2.1118e+07	10993.1	0	0	0	0	0	0	9.73764e+06	2.78604e+07	4.84987e+07	8.20454e+07	5.72592e+07	7.62974e+06	2.72144e+06	0	0	0	0	0	0	0	660624	641685	1.04484e+07	0	0
568	0	0	0	0	0	0	626803	685365	1.9171e+06	5.76597e+06	10944.8	0	0	0	0	0	0	0	2.42972e+06	3.84544e+06	7.41819e+07	2.02064e+07	7329.36	2.66799e+06	3.66436e+06	7.03858e+06	6.0766e+06	3.54204e+07	6.09332e+07	1.21996e+07	2.85214e+07	5.34325e+07	2.79098e+07	6.3434e+07	0	0
569	0	0	0	0	0	0	0	0	24441.6	0	0	0	0	0	0	0	0	0	13993.3	4.02513e+07	8.88466e+07	9.021e+07	1.02683e+07	1.48273e+06	716008	0	0	0	0	0	3.03908e+06	5.02907e+06	4.63725e+07	5.96586e+07	3.86546e+06	0
570	0	0	0	0	0	0	626411	0	0	0	0	0	0	0	0	0	0	0	3.04606e+06	3.03106e+07	6.38432e+07	8.49497e+07	6.17695e+06	1132.56	0	0	0	0	0	1.5399e+06	2.31651e+07	6.05032e+07	9.05796e+07	5.75212e+07	2.98576e+07	4.50774e+07
571	0	0	0	0	0	0	0	0	1.55888e+07	2.51651e+07	0	0	0	0	0	0	0	0	0	4.83173e+07	3.7055e+06	0	0	0	0	0	0	0	0	0	0	0	0	0	0	0
572	0	0	0	0	9115.12	8964.4	4.54954e+07	6.11253e+07	6.2663e+07	5.95502e+07	721480	0	0	0	0	0	0	0	0	7058.89	3.01003e+07	9.06301e+06	0	0	0	0	0	0	0	0	1.52846e+07	1.1941e+07	5.29703e+07	4.11095e+07	0	0
573	0	0	0	0	0	0	10497.4	665382	678669	0	0	0	0	0	0	0	0	0	626607	0	0	7280.9	3692.67	0	0	0	0	0	0	0	0	1.93187e+07	5.45951e+07	4.47808e+07	4.58307e+07	1.90606e+07
574	0	0	0	0	0	0	0	1.00359e+07	1.02551e+07	0	0	0	0	0	0	0	663761	1.2776e+06	6.207e+07	8.25379e+07	7.77204e+07	7.39991e+07	742574	0	0	0	0	0	0	0	38340.2	1.24142e+07	2.44636e+07	8.76039e+07	2.97208e+07	9.44925e+06
575	0	0	0	0	0	0	0	0	1.30256e+06	3.39011e+06	4895.5	723922	0	0	0	0	0	0	0	2.46094e+06	0	0	0	0	0	0	0	0	638013	19056	9.70555e+06	2.89858e+07	4.3614e+07	8.7618e+07	663451	724099
576	1.18765e+07	0	0	2.49052e+06	638581	2.45086e+06	1.22354e+07	2.11063e+07	9.91838e+06	1.06684e+07	10910.5	0	0	0	0	0	0	15090.3	1.29788e+07	4.71499e+07	3.94558e+07	1.46778e+07	0	2.71758e+06	731579	0	0	0	0	0	4.87232e+06	7.92661e+06	5.91218e+07	5.69207e+07	0	753022
577	0	0	0	0	0	0	2.49876e+06	2.86814e+07	9.47706e+07	1.8239e+07	7.23212e+06	815223	0	0	0	0	0	0	0	1.26693e+06	7.05967e+06	5.76434e+06	8.28237e+06	0	0	0	0	0	0	0	4.90284e+06	2.23857e+07	6.77355e+07	3.57322e+07	0	0
578	0	0	0	0	0	0	0	0	0	0	0	0	0	0	0	0	0	0	5.56114e+06	7.04885e+07	8.13225e+07	2.43108e+07	4.6945e+06	0	0	0	0	0	0	0	23183.5	1.28622e+07	6.43903e+07	6.34861e+07	4.86728e+07	2.60467e+07
579	0	0	0	0	0	0	0	0	0	0	0	0	0	0	0	0	0	0	0	0	1.02684e+07	1.26043e+07	0	0	705282	0	0	0	0	1.29139e+06	799868	2.04676e+07	6.55304e+07	4.04686e+07	3.05859e+07	9.6855e+06
580	0	0	0	0	0	0	2.8879e+07	2.97243e+07	2.96343e+07	658612	0	0	0	0	0	0	0	0	0	0	636680	0	0	62449.6	0	0	0	0	0	0	2.44682e+06	2.46878e+07	4.50846e+07	9.273e+07	2.79919e+07	821438
581	0	0	0	0	0	0	0	0	0	0	0	0	0	0	0	0	0	0	0	0	1.93323e+06	2.55063e+06	1218.63	0	0	0	0	0	0	0	0	1.22677e+07	5.81896e+07	3.90575e+07	0	0
582	0	0	0	0	0	0	0	0	0	0	0	0	0	0	0	0	0	0	3499.14	1.31699e+07	2.06289e+06	3.76558e+07	5.14058e+06	0	0	0	0	0	0	0	6.06287e+06	8.52156e+06	5.00115e+07	5.88444e+07	2.5074e+07	1.22856e+07
583	0	0	0	0	0	0	0	0	0	0	0	0	0	0	0	0	0	0	0	0	0	0	0	0	0	0	0	0	0	0	0	28174.9	3.09802e+07	6.05167e+07	0	0
584	0	0	0	0	0	0	0	0	0	0	0	0	0	0	0	0	0	0	3.03812e+06	3.01622e+07	4.57877e+07	4.20869e+07	8.11043e+06	7590.09	0	0	0	0	0	624547	4.8644e+06	7.43614e+07	4.3626e+07	3.06902e+07	4.63129e+06	1.60676e+06
585	0	0	0	0	0	0	0	0	0	0	0	0	1.48578e+06	0	0	0	0	0	3503.94	0	666820	7.32826e+06	798312	0	0	0	0	0	0	0	0	2.22047e+07	3.9257e+07	6.59431e+07	2.51926e+07	2.62494e+07
586	0	0	0	0	0	0	1.33687e+07	3.72963e+07	5.52206e+07	3.91531e+07	3.14864e+06	12379.3	0	0	0	0	0	0	0	7.97298e+06	3.38385e+07	0	11024.1	0	0	0	0	0	0	0	0	38847.8	1.64463e+07	0	0	0
587	0	0	0	0	0	0	0	0	0	0	0	0	0	0	0	0	0	0	0	8.03124e+06	4.79819e+07	2.42386e+07	0	0	0	0	0	0	0	17423.1	1.47938e+07	2.19465e+07	4.04234e+07	1.23966e+07	0	0
588	0	0	0	0	0	0	0	0	0	0	0	0	0	0	0	0	0	0	0	0	0	3666.51	15943.3	0	0	0	0	0	0	0	0	0	1.50316e+07	2.94086e+07	0	0
589	0	0	0	0	0	1154.27	2.02936e+07	2.77659e+07	2.04005e+07	5.72608e+06	0	0	0	0	0	3594.37	1.27687e+06	2.84326e+07	3.2477e+07	4.75259e+07	7.44659e+07	9.02973e+07	4.3705e+07	429826	0	0	0	0	0	3.48146e+07	6.76367e+07	2.24639e+07	4.88772e+07	7.9032e+07	3.60757e+06	3798.73
590	1.68506e+06	0	0	0	0	643976	7.40274e+06	651591	9.92301e+06	2397.44	0	0	0	0	0	0	0	0	1.00679e+07	1.35864e+07	4.16732e+07	7.38835e+07	3.00988e+07	4.10252e+06	16042.8	0	0	0	0	0	0	152435	3.66121e+07	4.39543e+07	4.23252e+07	2.69595e+07
591	0	0	0	0	0	0	0	0	0	0	0	0	0	0	0	0	0	0	2.43278e+06	3.40305e+07	2.15589e+07	15844.7	0	0	705141	0	0	0	0	2.638e+07	6.87258e+07	2.64769e+07	7.23853e+07	3.56062e+07	7.29333e+06	66253.3
592	0	0	0	0	0	0	2.45507e+06	3.33787e+07	3.44678e+07	2.63961e+07	0	0	0	0	0	0	0	0	7007.79	6.16837e+06	4.94259e+07	1.20685e+07	0	757061	0	0	0	0	0	16291.7	3.43734e+07	6.61995e+07	6.14444e+07	4.91081e+07	0	0
593	0	0	0	0	0	0	0	1.25066e+07	2.88186e+07	3.90168e+07	9.29936e+06	0	0	0	0	0	0	0	626490	2.01277e+07	3.18242e+06	1.43092e+07	3.98942e+06	0	0	0	0	0	0	0	2.42502e+06	3.08948e+06	6.84366e+07	7.55834e+07	5.45887e+07	9.88431e+06
594	0	0	0	0	0	0	0	0	0	0	0	0	0	0	0	0	0	0	2.4307e+06	9.47505e+06	2.20516e+07	9.30115e+06	3.90948e+07	13601.6	0	0	0	0	0	0	0	7.37824e+06	678037	6.73302e+07	36562.7	0
595	0	0	0	0	0	0	0	0	7.42123e+06	1.87789e+07	3.26686e+06	0	0	0	0	0	0	629018	8.59881e+06	7.93249e+07	7.12536e+07	5.62797e+07	1.4371e+07	6.41052e+06	0	0	0	0	0	627685	15124.2	1.7318e+07	6.51597e+07	5.69738e+07	2.9559e+07	9.6393e+06
596	0	0	0	0	0	0	0	0	0	0	0	0	0	0	0	0	0	0	0	0	0	0	0	0	0	0	0	0	0	0	1.59041e+07	3.06705e+07	4.21195e+07	7.28068e+07	2.1602e+07	853018
597	0	0	0	0	0	0	9.31148e+06	4.74876e+07	6.46907e+07	4.00273e+07	1.14475e+07	1.54128e+06	0	0	0	0	0	0	0	173442	3.14983e+07	2.70259e+07	0	0	0	0	0	0	0	0	0	5.56995e+06	5.30985e+07	6.77812e+07	1.56843e+07	0
598	0	0	0	0	0	0	0	0	0	0	0	0	0	0	0	0	0	0	0	0	1.26932e+06	7.0708e+06	0	0	0	0	0	0	0	0	2.44917e+06	8.80951e+06	6.42774e+07	8.1144e+07	730663	2.65258e+06
599	731169	0	0	0	0	0	6.10743e+06	5.47318e+07	7.694e+07	2.55183e+07	241842	0	0	0	0	0	0	0	8.68063e+06	4.82792e+07	4.71688e+07	7.15641e+07	300190	1130.6	0	0	0	0	0	0	0	3.10431e+06	1.05273e+07	5.68497e+07	5.39999e+06	5.98996e+06
600	0	0	0	0	0	0	22019	1.16938e+07	3.11962e+07	7275.51	0	0	0	0	0	0	0	0	0	1.49435e+07	3.03074e+07	7.92704e+07	2.18069e+07	6.00711e+06	0	0	0	0	0	0	0	23516.5	2.13857e+07	5.78852e+07	2.55927e+06	0
601	0	0	0	0	0	0	0	0	0	0	0	0	1.17024e+07	48522.7	0	0	0	0	0	0	638711	0	729382	0	733657	0	0	0	0	0	3501.59	2.37243e+07	1.95331e+07	5.4333e+07	6.8829e+06	0
602	0	0	0	0	0	0	0	3.11433e+06	15357.3	0	0	0	0	0	0	0	0	8.71184e+06	4.31614e+06	2.92807e+07	5.35747e+07	15846.2	0	0	0	0	0	0	0	0	24411	1.20816e+07	5.45261e+07	9.97404e+07	2.43087e+07	3.46223e+06
603	0	0	0	0	0	9.9579e+06	2.51678e+07	4.61864e+07	3.09758e+06	0	0	0	0	0	0	0	0	0	0	0	0	0	0	0	0	0	0	0	0	0	0	3.13569e+06	3.44161e+07	2.70013e+07	71427.5	724135
604	0	0	0	0	0	0	2.42539e+06	4.99138e+06	6.274e+07	1.4337e+07	60511.7	0	0	0	0	0	0	2.5067e+06	6.1087e+06	1.52195e+07	8.18006e+07	5.58874e+07	1.18706e+07	6.28325e+06	0	0	0	0	0	0	2.42889e+06	9.82618e+06	4.22065e+07	8.27293e+07	2.27215e+07	0
605	0	0	0	0	0	0	0	0	1.76367e+07	3.48505e+07	968008	0	0	0	0	0	0	0	0	15330.5	1.25861e+07	5.71583e+06	5.17991e+06	0	0	0	0	0	0	0	0	7060.55	637974	0	0	0
606	705211	0	0	0	0	0	0	0	8.86943e+06	0	0	0	0	0	0	0	0	0	0	0	0	0	0	0	0	0	0	0	0	0	0	643258	2.48599e+06	3.22414e+06	1217.49	0
607	0	0	0	0	0	0	4.93518e+06	5.02364e+06	663838	0	0	0	0	0	0	0	5.5737e+06	5.98522e+06	6.78427e+07	5.54444e+07	2.5107e+06	0	0	0	0	0	0	0	0	1.90666e+06	3.8691e+07	3.29259e+07	8.30676e+07	7.15138e+07	8.3101e+06	0
608	0	0	0	0	0	0	0	0	0	0	0	0	0	0	0	0	0	0	1.2356e+07	2.93904e+07	9.15573e+07	1.2154e+07	4.35679e+06	0	0	0	0	0	0	0	3502.41	4.96927e+06	1.43744e+07	15804.1	0	0
609	0	0	0	0	0	0	626509	0	0	0	0	0	16044.2	702028	0	0	0	0	0	3.18602e+06	7.50567e+07	3.26331e+07	31924.3	0	0	0	0	0	0	627568	1.79897e+07	1.64209e+07	3.00745e+07	4.91173e+07	3.48552e+06	6.09602e+06
610	0	0	0	0	0	0	0	1.26953e+06	0	2.39019e+07	4.36363e+06	0	0	0	0	0	0	0	1150.87	5.63441e+06	1172.01	0	0	0	0	0	0	0	0	0	2.4231e+06	1.94771e+07	3.82675e+07	7.67912e+07	1.92054e+07	0
611	765539	0	0	0	0	0	13912.4	1.54921e+07	2.20046e+07	2.17014e+07	1101.04	0	0	0	0	0	0	0	3.0465e+06	2.03325e+07	5.46438e+07	7.16414e+07	1.50538e+06	0	0	0	0	0	0	782417	2.29748e+07	3.71324e+07	7.23183e+07	4.3548e+07	2.99483e+07	2.07713e+06
612	0	0	0	0	0	0	0	5.55332e+06	0	0	0	0	0	0	0	0	0	0	2.06664e+07	2.30569e+07	5.8832e+07	3.44026e+07	0	0	0	0	0	0	0	0	5.4793e+06	6.66067e+07	8.07409e+07	9.95078e+07	3.57208e+07	1.76138e+07
613	0	0	0	0	0	0	1.43797e+07	2.08485e+06	4.43659e+07	3.31311e+07	0	0	0	0	0	0	0	0	0	0	0	0	0	0	0	0	0	0	0	1154.83	5.48479e+06	5.60016e+06	4.73534e+07	1.12935e+08	4.43889e+07	5.19528e+07
614	0	0	0	0	0	0	0	0	9102.88	2.54111e+06	0	0	0	0	0	0	0	0	0	177694	3.73163e+07	3.37255e+07	4.02668e+06	0	0	0	0	0	0	0	3.69321e+06	1.53019e+07	4.65871e+07	2.53972e+06	666043	0
615	0	0	0	0	0	0	0	0	0	2.98796e+07	2.2044e+06	2.57679e+06	0	0	0	0	0	4.94978e+06	4.11864e+07	5.73626e+07	7.11181e+07	6.65685e+07	0	0	0	0	0	0	0	627999	1.11727e+07	1.36686e+07	9.57646e+07	3.93715e+07	3687.25	687065
616	0	0	0	0	0	0	0	1168.46	8237.78	190861	0	0	0	0	0	0	0	0	0	0	3.97147e+07	6.19807e+07	1.19742e+07	15089.8	0	0	0	0	0	0	626686	1.67586e+07	1.66506e+07	4.50702e+07	2.57487e+06	0
617	0	0	0	0	0	0	0	0	0	0	0	0	0	0	0	0	0	0	0	5.55396e+06	634838	0	0	0	0	0	0	0	0	0	2.40821e+06	1.76666e+07	2.72354e+07	6.00776e+07	1.61757e+06	0
618	0	0	0	0	0	628861	1.17462e+07	633525	1.74155e+07	0	71438	0	0	0	0	0	0	0	0	2.46337e+06	3.75599e+06	3.8184e+07	2.92447e+07	4.22217e+06	0	0	0	0	0	0	3505.68	28239	2.29326e+07	24294.1	0	0
619	0	0	0	0	0	0	0	0	0	0	0	0	0	0	0	0	0	1.48775e+07	6.02706e+07	1.06242e+08	5.43004e+07	4.89792e+06	9399.55	0	0	0	0	0	0	15135.3	2.42596e+06	1.96522e+07	2.93258e+07	7.12225e+07	4.21927e+07	6.34343e+06
620	0	0	0	0	0	0	0	0	0	0	0	0	0	0	0	0	0	0	0	0	0	658022	0	0	3709.53	0	0	0	0	0	0	7045.01	9.13529e+06	0	0	0
621	0	0	0	0	0	0	6.79548e+06	30606.9	2.60641e+07	2.5222e+07	76258.4	0	0	0	0	0	0	0	0	0	0	0	0	0	0	0	0	0	0	0	2.4205e+06	4.95683e+06	2.67852e+07	8.44863e+07	73371.8	0
622	0	0	0	0	0	0	0	1.2713e+06	6.63978e+07	2.5398e+06	0	0	0	0	0	7129.72	16528.8	2.31916e+07	8.05936e+07	6.6259e+07	4.14296e+07	2.63068e+07	0	0	0	0	0	0	0	0	31299.2	1.15247e+07	6.67978e+07	4.79262e+07	18214.5	0
623	0	0	0	0	0	0	0	0	0	0	0	0	0	0	0	0	0	0	3502.82	1.19337e+07	5.00504e+07	3.01092e+07	2.82337e+07	0	0	0	0	0	0	0	5.45614e+06	2.19273e+07	4.21484e+07	694100	0	0
624	0	0	0	0	0	0	0	643588	2.58132e+07	0	0	0	0	0	0	0	0	3.68683e+06	1.83819e+07	6.37333e+07	6.07125e+07	4.98802e+07	0	0	0	0	0	0	0	0	0	35166.4	2.23843e+07	2.21329e+07	8543.58	0
625	0	0	0	0	0	0	0	0	1.4756e+07	5.29006e+07	2.18305e+07	0	0	0	0	0	0	0	0	0	0	0	0	0	0	0	0	0	0	0	0	2.46175e+06	1.50422e+07	4.00655e+07	3.11944e+07	98822.8
626	0	0	0	0	0	6.08755e+06	5.17967e+07	3.92654e+07	0	0	0	0	0	0	0	0	0	0	0	0	9.47467e+06	2.11153e+06	1.87141e+07	29092.1	0	0	0	0	0	0	1150.62	9.88085e+06	4.15923e+07	8.58098e+07	2.23993e+07	3817.23
627	0	0	0	0	0	0	0	4.29481e+07	6.15333e+07	4.65653e+07	1.83889e+07	1.68286e+07	3.97361e+06	2.55573e+06	0	0	2.48697e+06	637993	3.00731e+07	8.20246e+07	6.40423e+07	6.13676e+07	654240	2.16076e+06	0	0	0	0	0	0	0	2.47247e+06	1.3079e+06	4.91853e+07	5.10098e+06	3818.45
628	0	0	0	0	0	15124.8	4.7663e+07	6.11349e+07	7.51489e+07	3.09671e+06	0	0	0	0	0	0	0	0	3.66838e+06	3.60849e+07	6.29088e+07	3.67438e+07	3692.16	0	0	0	0	0	0	0	0	3.10406e+06	3.62649e+07	9.17816e+07	4.04393e+07	1.34021e+07
629	0	0	0	0	0	2.43257e+06	1.7721e+07	6.40959e+07	7.05235e+07	3.03135e+07	0	0	0	0	0	0	0	0	0	0	1.32391e+07	1.97297e+07	1100.77	0	0	0	0	0	0	0	0	1.19574e+07	9.79753e+06	5.75022e+07	1.01601e+07	0
630	0	0	0	0	0	0	0	0	0	0	0	0	0	0	0	0	0	0	0	0	0	0	0	0	16883.2	0	0	0	0	0	3.05233e+06	2.64583e+07	3.68662e+07	6.18016e+07	6.38724e+06	1.55174e+06
631	0	0	0	0	0	0	0	2.5706e+06	5.81867e+07	1.36051e+07	1.43903e+07	1.57981e+06	0	0	0	0	0	0	7005.64	2.46506e+06	3.10951e+07	9408.2	0	0	0	0	0	0	0	0	0	0	0	0	0	0
632	0	0	0	0	0	2.43394e+06	3.68639e+06	2.11076e+07	5.07283e+07	1.63385e+07	2.06841e+06	0	0	0	0	0	0	633315	1.84561e+07	4.96788e+07	3.21448e+07	2.93611e+07	0	0	0	0	0	0	0	0	3.05707e+06	3.39253e+07	9.21284e+07	7.75278e+07	1.69538e+07	2.66404e+06
633	0	0	0	0	0	0	1.41258e+07	7.49908e+07	7.4133e+07	2.53274e+07	730432	0	0	0	0	0	0	0	0	1.90667e+06	0	0	0	0	0	0	0	0	0	0	5.61875e+06	5.24254e+06	4.96274e+07	3.82546e+07	2.6342e+07	0
634	0	0	0	0	0	0	0	155906	0	0	0	0	0	0	0	0	0	0	0	0	0	0	0	0	0	0	0	0	0	0	149615	3.89941e+06	6.52605e+07	5.50339e+07	4.39374e+07	6.3451e+06
635	0	0	0	0	0	0	0	0	0	0	0	0	0	0	0	0	0	0	0	8.58805e+06	1.12174e+07	4.51627e+07	0	0	0	0	0	0	0	0	0	0	4.38218e+06	0	0	0
636	0	0	0	0	0	0	0	0	1.04686e+07	4.37321e+07	1.64566e+07	0	0	0	0	0	0	0	2.42641e+06	3.2908e+07	5.09554e+07	5.8792e+07	7.21634e+06	0	0	0	0	0	0	0	10449.6	1.11639e+07	5.36574e+07	5.92214e+07	2.88889e+07	9.30527e+06
637	0	0	0	0	0	0	0	0	0	0	0	0	0	0	0	0	0	1.28187e+06	4.16601e+07	5.76586e+07	0	0	0	0	0	0	0	0	0	1154.27	659209	3.38268e+07	3.83289e+07	6.08363e+07	1.70115e+07	687026
638	0	0	0	0	0	0	10451.6	1.27936e+06	3548.8	0	0	0	0	0	0	0	0	0	0	17587.7	0	7283.8	0	0	0	0	0	0	0	0	626882	665485	1.79965e+07	5.55307e+07	1.56056e+06	0
639	0	0	0	0	0	0	0	0	0	0	0	0	0	0	0	0	0	0	0	1.31816e+07	5.60249e+07	6.72322e+07	76464.9	0	0	0	0	0	0	0	0	0	9.86347e+06	6.70689e+07	2.56337e+06	0
640	0	0	0	0	0	0	0	0	0	0	0	0	0	0	0	0	0	0	3.04987e+06	8.00562e+06	5.46825e+06	0	0	0	0	0	0	0	0	0	0	1.01558e+07	8.14918e+06	657758	33136	686909
641	0	0	0	0	0	0	0	2.11644e+07	4.69925e+07	6.00204e+07	1.09948e+07	75017.5	0	0	0	0	0	0	1.33752e+07	7.18393e+07	8.55745e+07	2.69958e+07	0	0	0	0	0	0	0	0	31462.8	2.0476e+07	3.37146e+07	9.81747e+06	0	0
642	0	0	0	0	0	143156	2.22696e+07	3.57223e+07	7.00125e+07	5.867e+07	1.11662e+07	6.74865e+06	0	0	0	0	0	0	10453.3	2.58082e+06	5.75907e+07	4.26026e+07	3.87695e+06	7588.64	734555	0	0	0	0	0	3.0755e+07	8.0611e+07	8.23674e+07	5.98988e+07	1.21928e+07	66285.4
643	0	0	0	0	0	0	2.45585e+06	3.32587e+06	0	0	0	0	0	0	0	0	2.47075e+06	0	3503.54	154305	3.55745e+07	1.85659e+07	9.10294e+06	1.40574e+07	0	0	0	0	0	0	0	0	1.11309e+07	2.56361e+07	1.10199e+07	2.6528e+06
644	0	0	0	0	0	0	3505.68	1.45028e+07	7.22508e+07	1.93287e+07	1.06834e+07	0	0	0	0	0	0	0	0	3.76655e+06	2.87085e+07	1.52231e+07	2.84694e+06	0	0	0	0	0	0	0	2.42598e+06	0	3.71142e+07	2.94396e+07	0	0
645	0	0	0	0	0	0	0	0	0	0	7333.91	0	0	0	0	0	0	0	0	9076.32	5.68047e+06	4.52728e+06	71061.7	0	0	0	0	0	0	0	0	5.55846e+06	4.45418e+07	3.99625e+07	1.50941e+06	0
646	0	0	0	0	0	0	0	0	0	0	0	0	0	0	0	0	0	0	1.10067e+07	5.04549e+07	5.48787e+07	6.24562e+07	1.94858e+07	1.65542e+07	0	0	0	0	0	0	3.03464e+06	2.04543e+07	3.56078e+07	0	0	0
647	0	0	0	0	0	1155.12	0	0	0	0	0	0	0	0	0	0	0	0	0	0	0	0	0	0	0	0	0	0	0	0	2.43645e+06	2.33971e+07	2.32425e+07	8.39476e+07	2.4572e+07	15203
648	705264	0	0	0	0	0	3.05888e+06	6.82433e+06	1.74363e+07	3.11069e+07	5.23805e+06	2.69231e+06	0	0	0	0	0	0	8.69759e+06	2.92316e+07	5.82976e+07	2.78753e+07	0	0	0	0	0	0	0	0	5.44706e+06	3.16686e+07	3.39632e+07	6.21916e+07	60494.3	0
649	0	0	0	0	0	4.85065e+06	1.62879e+07	3.93387e+07	4.88303e+07	2.11122e+07	0	0	0	0	0	0	0	0	17467.8	6.13479e+06	2.79865e+07	4.43432e+07	1.92637e+07	9.1516e+06	0	0	0	0	0	0	0	0	2.57245e+07	6.45769e+07	3.5613e+07	3.45669e+07
650	0	0	0	0	0	0	634045	4.73068e+07	9.39037e+07	3.53632e+07	1.25899e+07	1.55389e+06	0	0	0	0	0	0	0	0	0	0	0	0	4.48638e+06	10943.4	0	0	0	629971	3.72251e+06	2.51424e+07	4.49765e+07	9.64686e+07	4.54737e+07	1.57337e+07
651	1105.53	0	0	0	0	0	0	0	0	0	0	0	0	0	0	0	0	0	0	0	0	3.19768e+06	0	0	0	0	0	0	0	1.25619e+06	1.27292e+07	4.01175e+07	5.44275e+07	8.81722e+07	2.55288e+06	0
652	0	0	0	0	0	0	1.47912e+07	1.61381e+07	0	0	0	0	0	0	0	0	0	0	1.09754e+07	1.54422e+07	4.52271e+07	2.22824e+07	0	0	1225.06	0	0	0	0	0	2.44187e+06	1.35525e+07	4.89244e+07	6.90369e+07	1.31776e+07	686889
653	0	0	0	0	0	0	2.41611e+06	2.30143e+07	5.01833e+07	4.32408e+07	1.97015e+07	2.40785e+06	0	0	0	0	0	636916	6.72371e+06	0	0	0	0	0	0	0	0	0	0	0	6.13504e+06	3.31389e+07	5.75511e+07	7.42448e+07	1.82625e+07	70085.1
654	0	0	0	0	0	0	627934	1.95127e+07	4.97633e+07	4.36877e+07	1.76283e+07	1.48703e+07	0	0	0	0	0	0	2.42126e+06	3.79925e+07	7.11581e+07	6.88076e+07	14659.6	0	0	0	0	0	0	0	3.05458e+06	1.7968e+07	2.33397e+07	5.04152e+07	3688.28	0
655	0	0	0	0	0	0	0	0	0	0	0	0	0	0	0	0	0	0	0	0	638792	1.68152e+07	0	0	0	0	0	0	0	0	0	0	647526	8.98469e+06	1.08671e+07	0
656	0	0	0	0	0	0	5.47781e+06	2.31109e+07	2.3025e+07	3.20056e+06	3.46526e+06	11283.8	0	0	0	0	0	0	0	0	0	0	0	0	0	0	0	0	0	0	4.88006e+06	1.77974e+07	5.66945e+07	7.32675e+07	1.16654e+07	2.1137e+06
657	0	0	0	0	0	0	0	1.0151e+07	4.85964e+07	0	0	0	0	0	0	0	0	0	3505.68	1.94911e+06	4.44913e+07	3.03772e+07	0	0	0	0	0	0	0	0	0	643074	7.49088e+07	5.3e+07	2.26635e+07	6.683e+06
658	0	0	0	0	0	0	3.05487e+06	2.10525e+07	0	0	0	0	0	0	0	0	0	0	657105	4.80902e+07	9.38117e+07	9.7359e+07	1.33359e+07	0	0	0	0	0	0	628293	5.50984e+06	2.98665e+07	7.60604e+07	7.84226e+07	0	0
659	0	0	0	0	0	0	0	1.13736e+07	8.82271e+06	0	0	0	0	0	0	0	0	1.19933e+07	6.30986e+07	2.92619e+07	8.31259e+07	3.43188e+07	3.35179e+07	3.58148e+06	0	0	0	0	0	0	3.05153e+06	77287.2	3.23084e+07	9.08906e+07	2.36697e+07	5.65554e+06
660	0	0	0	0	0	15138.6	3.70174e+06	1.95207e+07	3.27538e+07	0	0	0	0	0	0	0	2.4593e+06	3.48008e+07	8.92794e+07	1.15162e+08	8.98907e+07	5.14035e+07	2.63773e+06	48759.8	0	0	0	0	0	0	0	0	637696	0	0	0
661	0	0	0	0	0	0	0	0	0	0	0	0	0	0	0	0	0	0	18585.8	3546.45	5.52632e+06	4.54937e+06	0	0	0	0	0	0	0	0	5.45829e+06	2.52178e+06	2.1162e+07	1.48186e+07	0	0
662	0	0	0	0	0	0	0	0	0	0	0	0	0	0	0	0	0	0	1.25223e+06	3.80687e+07	9.44173e+07	5.63751e+07	3.23044e+06	38686.9	0	0	0	0	0	632474	2.05965e+07	5.34561e+07	7.04998e+07	5.57331e+07	6.42814e+06	0
663	0	0	0	0	0	0	0	0	0	0	0	0	0	0	0	0	0	0	0	0	0	0	0	0	91336.8	0	0	0	0	0	0	42381.2	4.14071e+07	8.15518e+07	236033	7.85045e+06
664	71740.3	0	0	0	0	0	0	0	0	0	0	0	0	0	0	0	0	0	0	0	0	0	0	0	0	0	0	0	0	0	10497.5	3.30094e+06	3.60454e+07	8.4877e+07	2.15216e+06	0
665	0	0	0	0	0	0	0	0	0	0	0	1133.57	0	0	0	0	0	1.28711e+06	4.92041e+07	8.63065e+07	4.29546e+07	5.69039e+07	187213	0	0	0	0	0	0	19750.8	2.44124e+06	2.11715e+07	5.84892e+07	8.50522e+07	2.80669e+07	2.16106e+07
666	0	0	0	0	0	0	0	0	0	0	0	66269.3	0	0	0	0	0	628234	671103	0	637974	0	0	0	0	0	0	0	0	0	0	0	2.48124e+06	3.58879e+07	662300	0
667	0	0	0	0	0	0	0	0	0	0	0	0	0	0	0	0	0	0	0	4.93245e+06	4.35991e+07	3.71927e+07	9.64434e+06	0	0	0	0	0	0	0	44177	7.48686e+06	5.49543e+07	9.96012e+07	7.04996e+06	3813.75
668	0	0	0	0	0	0	0	0	0	0	0	62482.8	0	0	0	0	0	6.80822e+06	5.60836e+07	9.85834e+07	3.1478e+07	2.52632e+07	2.65285e+06	73719.9	0	0	0	0	0	0	2.42325e+06	6.79267e+06	5.57128e+07	3.49313e+07	0	0
669	0	0	0	0	0	0	0	0	0	0	0	0	0	0	0	0	0	0	15088.4	3.75898e+06	667584	0	0	0	0	0	0	0	637974	3463.63	4.5343e+07	9.17175e+07	7.08435e+07	6.9828e+07	3.25989e+07	2.2896e+07
670	0	0	0	0	0	3514.67	1.12556e+07	1.34595e+07	5.92029e+07	3.69808e+07	3645.87	0	0	0	0	0	0	0	0	0	0	0	0	0	1.35545e+07	1.3903e+06	59459.8	8.95778e+06	10288.7	46326.7	1.83728e+07	2.26684e+07	4.04306e+07	4.50832e+07	1.03272e+07	21244.1
671	0	0	0	0	0	8956.64	1.25114e+06	657872	1.07489e+07	0	0	0	0	0	0	0	0	0	0	1.50245e+07	2.00323e+07	2.2916e+07	2.56889e+06	8840.06	0	0	0	0	0	628861	9.73672e+06	6.12823e+07	7.67115e+07	1.05086e+08	3.59954e+07	96874.6
672	0	0	0	0	0	0	9.45096e+06	3.79707e+06	6.27403e+06	9.18196e+06	0	0	0	0	0	0	0	0	13843	2.92183e+07	4.5341e+07	3.30094e+07	0	0	0	0	0	0	0	0	8.46005e+06	6.11362e+07	5.08088e+07	7.77906e+07	1.89816e+07	823360
673	0	0	0	0	1.31101e+06	1.18034e+07	5.26934e+07	3.9692e+07	5.57172e+06	0	0	0	0	0	0	0	0	0	626823	31693.7	2.28141e+07	1.96685e+07	0	0	0	0	0	0	0	0	28966.9	1.7016e+07	2.70701e+07	1.02903e+08	2.34187e+07	7588.02
674	0	0	0	0	0	0	633449	3.98523e+07	8.0897e+07	9.95353e+06	15961.4	0	1.37499e+06	0	0	0	0	0	1.25585e+06	4.96965e+07	7.7643e+07	2.17072e+07	1.34372e+06	0	0	0	0	0	0	0	0	0	0	0	0	0
675	0	0	0	0	0	0	0	0	0	0	1101.07	0	0	0	0	0	0	0	0	1.01071e+07	2.68346e+07	4.34639e+07	7.5701e+06	7586.36	0	0	0	0	0	0	4.86111e+06	3.89622e+06	3.96015e+07	4.16126e+07	1.04415e+07	4.15609e+06
676	0	0	0	0	0	0	0	4.43362e+06	0	0	0	0	0	0	0	0	0	0	3.0854e+06	4.03952e+07	7.7535e+07	2.47205e+07	63969.2	0	0	0	0	0	0	632829	2.4041e+06	1.25799e+07	4.97853e+07	7.27412e+07	20423.3	0
677	976289	8433.33	0	0	0	0	0	1.9005e+06	635603	0	0	0	0	0	0	0	0	0	0	1.00424e+07	8.6504e+07	1.34827e+07	0	0	0	0	0	0	0	1.88172e+06	1.59434e+07	6.17565e+06	0	0	0	0
678	0	0	0	0	0	0	0	0	0	5.77963e+06	3689.4	0	0	0	0	0	0	0	0	3.70728e+06	2.91873e+07	2.96264e+07	0	0	2.71512e+06	0	0	0	0	0	2.41048e+06	2.86117e+07	8.66549e+07	3.43659e+07	1.36117e+07	2.65866e+06
679	0	0	0	0	0	0	627049	8.82409e+06	4.8801e+07	1.41575e+07	48908.2	753372	0	0	0	0	0	0	0	145441	0	0	0	0	0	0	0	0	0	0	3505.68	1.78738e+07	2.51835e+07	6.59387e+07	3.25535e+07	2.5011e+07
680	0	0	0	0	0	0	0	0	0	0	0	0	0	0	0	0	0	0	0	0	649851	4.16295e+06	662490	0	0	0	0	0	0	0	626385	2.86791e+07	3.32399e+07	2.70492e+07	5.65626e+06	0
681	0	0	0	0	0	0	0	0	0	0	0	0	0	0	0	0	0	0	628029	1.17342e+07	4.98549e+07	4.31635e+07	1.26754e+07	5.04267e+06	0	0	0	0	0	0	2.81323e+07	5.28584e+07	5.47184e+07	5.25755e+07	7.54341e+06	15092.6
682	0	0	0	0	0	0	0	0	0	0	0	0	0	0	0	0	0	0	2.42881e+06	2.61211e+07	7.7847e+07	5.55762e+07	1.04355e+07	687065	7325.84	0	0	0	0	0	2.41855e+06	5.01445e+06	4.09988e+07	4.92063e+07	0	0
683	0	0	0	0	0	0	0	0	1.01287e+07	7.5957e+06	0	0	0	0	0	0	0	0	0	0	0	0	0	0	0	0	0	0	0	0	2.41292e+06	1.98757e+07	2.64183e+07	4.72795e+07	0	0
684	0	0	0	0	0	0	0	1169.86	2.4624e+06	35131	0	0	0	0	0	0	9109.45	1.68521e+07	6.08881e+07	0	0	0	0	0	0	0	0	0	0	0	661737	208186	4.04597e+07	8.53296e+07	4.11484e+07	1.25515e+07
685	0	0	0	0	0	0	0	1.2568e+07	2.26956e+07	0	0	0	0	0	0	0	0	15133.9	7.18096e+06	6.63541e+07	7.68076e+07	1.02959e+08	2.67037e+07	2.31311e+06	0	0	0	0	0	143117	1.6572e+07	3.40492e+07	6.0309e+07	7.94506e+07	6.28734e+06	0
686	0	0	0	0	0	0	1.64781e+07	3.28157e+07	8.12468e+07	8.15456e+07	2.49932e+07	1.47559e+06	0	0	0	0	0	0	6955.13	0	0	0	0	0	0	0	0	0	0	15129.1	2.14454e+07	2.81574e+07	5.24329e+07	5.21687e+07	662275	0
687	0	0	0	0	0	0	0	0	0	655964	0	0	0	0	0	0	0	0	0	0	8.06584e+06	1.9226e+07	5.02434e+06	0	0	0	0	0	0	0	0	0	0	0	0	0
688	0	0	0	0	0	0	0	4.89471e+06	3.1497e+07	1.22167e+07	0	0	0	0	0	0	0	0	8.50481e+06	2.98335e+07	4.88933e+07	4.77983e+07	5.926e+06	77569.2	0	0	0	0	0	0	646942	2.88198e+07	5.6463e+07	3.47559e+07	1.27752e+07	0
689	0	0	0	0	0	0	0	0	0	0	0	0	0	0	0	0	0	629835	2.47126e+06	4.21047e+07	2335	1.9696e+06	0	0	0	0	0	0	0	1.05065e+07	1.71099e+07	1.67511e+07	5.60793e+07	8.57288e+07	3.66604e+07	685478
690	0	0	0	0	0	0	0	1.45294e+07	6.02298e+07	4.35236e+07	2.55742e+06	0	15971	0	0	0	0	0	3503.94	652103	1.46959e+07	5.05882e+06	731404	0	25680.6	701816	0	0	0	0	0	2.48926e+06	3.53989e+07	6.75442e+07	2.00744e+07	0
691	0	0	0	0	0	0	7.92857e+06	2.53499e+07	2.74095e+07	6.38851e+06	0	0	0	0	0	0	0	0	0	652801	1.98878e+07	5.18442e+06	0	0	0	0	0	0	0	0	3501.9	1.68599e+07	3.36478e+07	6.5134e+07	7.34266e+06	0
692	0	0	0	0	0	0	142642	3.62738e+07	6.97597e+07	6.69088e+07	98891.8	134799	0	0	0	0	0	0	2.42216e+06	2.56909e+07	3.13432e+07	3.20407e+07	0	0	0	0	0	0	0	3.66864e+06	4.09584e+07	6.07803e+07	2.03146e+07	9.42092e+07	5.03627e+07	5.62371e+07
693	0	0	0	0	0	0	1.29489e+07	9.25827e+06	0	3662.22	37837.6	0	0	0	0	0	0	0	2.0353e+07	5.72262e+07	6.45218e+07	5.50447e+07	3691.24	0	0	0	0	0	0	0	4.8744e+06	2.26871e+07	6.47665e+07	7.92994e+07	3.71972e+07	2.36178e+07
694	0	0	0	0	0	0	0	628606	2.17403e+07	1.33389e+07	2.52622e+06	0	0	0	0	0	0	0	0	3.24041e+07	6.66775e+07	7.55127e+07	1.55125e+07	1.00983e+07	0	0	0	0	639655	28645	2.43447e+07	5.34237e+07	7.70089e+07	6.75427e+07	1.50043e+07	2.67484e+06
695	0	0	0	0	30737.5	5.59231e+06	5.47971e+07	6.84844e+07	6.74706e+07	3.07629e+07	1.12351e+07	0	60750.2	0	0	0	1173.82	4.8798e+06	3.88901e+07	7.80913e+07	8.19641e+07	7.51659e+07	3.44487e+07	1.85868e+07	661628	2.55875e+06	0	0	0	0	6997.57	9.87783e+06	2.67626e+07	7.82575e+07	1.06457e+07	7569.8
696	0	0	0	0	2.45681e+06	4.27382e+07	6.35104e+07	6.71552e+07	4.19647e+07	1.08489e+07	3.61526e+06	698869	0	0	0	0	0	0	0	0	0	0	0	0	1.47613e+06	18270	0	0	0	1154.46	4.84649e+06	634721	1.11556e+07	3.72312e+07	6.1351e+06	4.04018e+06
697	0	0	7201.16	0	0	0	0	0	0	0	0	0	0	0	0	0	0	9.93968e+06	697344	8.39318e+07	5.2493e+07	2.95254e+07	7363.88	0	0	0	0	0	0	0	0	664033	5.71132e+07	4.94847e+07	3.19795e+06	0
698	0	0	0	0	0	0	9.30294e+06	6.09263e+07	3.90965e+07	5.53623e+07	1.58973e+06	0	0	0	0	0	0	0	0	8.82796e+06	1.01685e+07	1.17027e+07	0	0	0	0	0	0	0	0	0	0	655556	0	701533	0
699	0	0	0	0	0	0	637502	1168.83	0	0	0	0	0	0	0	0	0	0	9.26775e+06	5.63795e+06	4.98497e+06	0	0	0	0	0	0	0	0	0	2.45779e+06	2.49909e+07	4.13167e+07	8.80407e+07	1.48054e+06	13668.8
700	0	0	0	0	0	0	0	0	0	1.9925e+07	0	0	0	0	0	0	0	0	0	2.42878e+06	2.98495e+07	2.41208e+07	3675.91	0	0	0	0	0	0	0	627829	748123	5.86368e+07	9.64782e+07	9.2676e+06	0
701	0	0	0	0	0	2.53143e+06	2.82866e+07	1.55665e+07	0	0	0	0	0	0	0	0	0	0	0	0	1.17433e+07	5.59667e+07	662608	0	0	0	0	0	0	1155.16	0	3.73309e+06	0	0	0	0
702	0	0	0	0	0	0	0	1.27214e+06	0	9404.62	729824	0	0	0	0	0	0	0	765928	4.65479e+07	4.66072e+07	2.54238e+06	64180.1	0	10994.2	730414	0	0	0	158368	6985	0	0	0	0	0
703	0	0	0	0	0	0	0	0	0	0	0	0	0	0	0	0	0	159429	1.87924e+07	6.39965e+07	4.48756e+07	4.59162e+07	7.10417e+06	0	60788.1	0	0	0	0	0	0	66431	6.4605e+07	5.13369e+07	1.06412e+07	3.72959e+06
704	0	0	0	0	0	0	0	6.7772e+06	637406	3.19433e+06	14621.4	0	1.48361e+06	0	0	0	0	2308.58	685161	1.12875e+07	1.07752e+08	2.58422e+07	1.06871e+07	0	0	0	0	0	0	624236	1.51152e+07	4.55662e+07	9.49698e+07	6.10265e+07	1.79349e+07	186292
705	0	0	0	0	8.8758e+06	0	0	0	646661	665193	673317	3816.51	0	0	0	0	0	1154.38	0	0	0	0	0	0	0	0	0	0	0	0	0	0	1.41757e+07	8.80883e+06	39297.5	2.65258e+06
706	0	0	0	0	0	0	0	1.26525e+06	5.01304e+06	0	0	0	0	0	0	0	7076.28	640588	0	0	0	0	0	0	0	0	0	0	0	0	0	2.38705e+07	4.62604e+07	6.63716e+07	671873	0
707	0	0	0	0	0	15138.6	0	1166.02	4.49813e+07	2.08529e+07	4.63837e+06	0	0	0	0	0	0	0	0	656611	7.35757e+07	2.90431e+07	734869	0	0	0	0	0	0	0	0	1.91389e+07	2.61556e+07	8.12568e+07	2.56811e+06	0
708	0	0	0	0	0	625763	4.08711e+07	7.3322e+07	6.70718e+07	6.12629e+07	2.84263e+07	3.07747e+06	0	0	0	0	0	0	0	0	2.54454e+06	2.63569e+06	4.07008e+06	7576.01	0	0	0	0	0	0	0	636876	1.09478e+07	2.32891e+07	0	0
709	0	0	0	0	0	0	0	0	0	0	0	0	0	0	0	0	0	0	6.72008e+06	0	2.45858e+06	0	0	0	3706.57	0	0	0	0	627744	5.44649e+06	5.76872e+07	3.1597e+07	4.45584e+06	0	0
710	0	0	0	0	0	30245.2	632137	636837	0	0	0	0	0	0	0	0	0	0	3505.68	2.78568e+07	1.86908e+07	3.82584e+06	0	0	0	0	0	0	0	15137.7	7002.37	2.52449e+07	2.58227e+07	5.61454e+07	13116.2	0
711	0	0	0	0	0	0	0	0	0	0	0	0	0	0	0	0	0	0	30136.6	1.62069e+07	1.43614e+06	2.42838e+07	60521.2	0	0	0	0	0	0	0	0	8.83439e+06	53019.8	3.75467e+07	23333.1	3818.56
712	0	0	0	0	0	0	647476	1168.13	0	0	0	0	0	0	0	0	0	0	3.271e+06	5.59829e+07	1.61703e+07	0	0	0	0	0	0	0	0	0	0	0	0	15795.9	0	0
713	0	0	0	0	0	0	2.4293e+06	6.43308e+06	7.78624e+07	4.58988e+07	0	0	0	0	0	0	0	0	0	0	7062.62	3653.84	809555	0	2.15076e+07	2.56727e+06	0	0	10288.6	14688	8.05552e+06	4.67041e+07	5.63794e+07	2.51157e+07	23184.8	0
714	0	0	0	0	0	0	0	0	0	0	0	0	0	0	0	0	0	0	0	0	0	0	0	0	0	0	0	0	0	0	0	0	6.26855e+06	2.18258e+07	0	0
715	0	0	0	0	0	0	0	0	0	0	0	0	0	0	0	0	0	0	0	0	636876	3.20045e+06	0	0	0	0	0	0	0	0	0	1.92725e+07	6.17491e+07	4.35375e+07	3.19445e+07	133340
716	0	0	0	0	0	0	0	0	0	0	0	0	0	10946.9	11858.7	0	1173.74	143234	1151.02	15329.5	0	0	0	0	0	0	0	0	0	0	0	0	0	657944	0	0
717	0	0	0	0	0	0	0	0	0	14591	723382	0	0	0	0	0	0	0	0	0	9.51117e+06	5.71423e+06	0	0	0	0	0	0	0	0	0	0	6.09554e+06	6.4591e+07	1218.45	26401.7
718	0	0	0	0	0	643745	0	0	1.91147e+06	0	0	0	0	0	0	0	0	0	0	2.05215e+06	4.01048e+07	3.11854e+07	7.04597e+06	0	0	0	0	0	0	0	0	0	7054.13	1.31207e+06	64177.6	9.71455e+06
719	0	0	0	0	0	0	0	2.49909e+07	1.27971e+06	0	0	0	0	0	0	0	0	0	0	0	0	0	0	0	0	0	3625.23	0	0	0	0	1.29497e+06	4.83117e+07	7.58546e+07	3.92045e+06	0
720	0	0	0	0	0	0	0	0	0	0	0	0	0	0	0	0	0	0	0	1.25787e+07	1171.27	15845.7	0	0	0	0	0	0	0	0	0	0	0	0	0	0
721	0	0	0	0	643982	4.40139e+06	7.23448e+06	1.2798e+06	0	0	0	0	0	0	0	0	0	0	0	0	1.29753e+06	1.82365e+07	69691.5	0	0	0	0	0	0	0	3.68765e+06	6.30021e+06	37658.6	0	0	0
722	0	0	0	0	0	5.49609e+06	3.02065e+07	1.31173e+07	1.7717e+07	3.19766e+06	76415.1	0	0	0	0	0	2.45998e+06	5.48188e+06	3.75154e+07	8.05944e+07	2.3107e+07	3.18146e+06	0	0	0	0	0	0	0	0	0	0	0	0	0	0
723	0	0	0	0	0	1.28496e+06	1.83943e+07	3.17579e+06	3.11351e+06	4872.49	0	0	0	0	0	0	0	0	0	0	0	0	0	0	0	0	0	0	0	0	2.69108e+07	1.99827e+07	2.47714e+07	1.30206e+07	3691.55	0
724	0	0	0	0	0	0	0	0	0	0	10946.1	0	0	0	0	0	0	0	0	6.19315e+06	3.81244e+07	7.14969e+07	1.51852e+07	0	0	0	0	0	0	143078	8.76166e+06	2.60382e+07	3.856e+07	9.60017e+07	6.73004e+07	2.60898e+07
725	0	0	0	0	0	0	0	1169.86	7066.97	0	0	0	0	0	0	0	0	0	0	0	0	2.54316e+06	0	0	0	0	0	0	0	0	8102.76	0	9.88311e+06	1.13508e+07	0	0
726	0	0	0	0	0	0	0	0	0	0	0	0	704752	730469	0	0	0	0	1.44984e+07	3.8788e+07	2.57921e+07	0	0	0	716167	0	0	0	0	15110.9	5.24219e+06	2.65873e+07	8.18262e+07	1.93173e+07	7.25476e+06	0
727	0	10946.4	0	0	0	0	0	0	0	0	0	0	0	0	0	0	0	0	0	0	0	0	0	0	1104.31	3688.07	0	0	0	39209.5	1.86874e+07	6.05871e+07	5.11412e+07	6.82492e+07	6.36454e+06	2.64351e+06
728	0	0	0	0	0	0	0	0	0	0	0	0	0	0	0	0	0	0	0	0	0	0	0	0	3.24215e+06	0	0	0	0	0	0	0	3.22224e+07	1.80194e+07	0	0
729	0	0	0	0	0	0	0	0	0	0	0	0	0	0	0	0	0	0	1151.17	1.27753e+06	2.9082e+07	1.92031e+07	123734	0	0	0	0	0	0	2.43188e+06	1.03223e+07	4.2664e+07	5.43469e+07	1.07122e+08	7.22174e+06	700590
730	0	0	0	0	0	0	0	2.46277e+06	6.19498e+06	2.53515e+06	0	0	0	0	0	0	0	0	0	0	0	0	0	0	0	0	0	0	0	2.58169e+06	7.21057e+07	1.0436e+08	6.0432e+07	2.73306e+07	7305.44	0
731	0	0	0	0	0	0	624569	634399	6.8226e+06	6.42697e+06	2.1915e+06	0	0	0	0	0	0	0	3504.86	3.13689e+07	3.27047e+07	1.20719e+07	0	0	0	0	0	0	0	0	7.27595e+06	8.02584e+06	1.5967e+07	4.2505e+07	5.49458e+06	0
732	0	0	0	0	0	15133.9	1.11857e+07	0	0	0	0	0	0	0	0	0	15345.3	3.71038e+07	7.07048e+07	8.69005e+07	8.99983e+07	8.04289e+07	1.13361e+07	7590.3	0	0	0	0	0	1.30081e+06	2.38805e+07	2.08963e+07	4.06907e+07	6.2387e+07	0	0
733	0	0	0	0	0	0	7.20822e+06	2.86244e+07	5.83622e+07	3.35023e+06	0	0	0	0	0	0	0	0	0	0	0	0	0	0	0	0	0	0	0	0	15084.1	1.32436e+06	1.0118e+07	0	0	0
734	0	0	0	0	0	0	0	0	0	0	0	0	0	0	0	0	0	644000	0	0	0	657944	0	0	727697	0	0	0	0	0	0	1.18425e+07	3.50435e+07	4.03308e+07	2.55409e+06	0
735	0	0	0	0	0	0	0	0	0	0	0	0	0	0	0	0	0	8960.82	3.39489e+07	4.33241e+07	645066	0	0	0	0	0	0	0	0	223724	9.82512e+06	1.79611e+07	3.43495e+07	1.41548e+07	2.56104e+06	0
736	0	0	0	0	0	0	0	0	634956	3661.61	2.57617e+06	0	0	0	0	0	0	0	1.89672e+07	5.00457e+07	6.184e+07	3.42207e+07	1215.34	0	0	0	0	0	0	0	31416.7	1.53095e+07	6.38391e+07	3.09578e+07	0	0
737	0	0	0	0	0	0	653944	9.28329e+06	3.00671e+07	2.54696e+06	0	0	0	0	0	0	2.47031e+06	5.30634e+06	5.37237e+07	9.81868e+07	6.83378e+07	5.85333e+07	2.09873e+07	0	0	0	0	0	0	0	13939	2.75877e+07	5.53244e+07	6.19735e+07	1.33152e+07	2.6564e+06
738	0	0	0	0	0	0	0	0	0	15845.7	0	0	0	0	0	0	0	0	0	3.10572e+06	3.33138e+07	1.20426e+07	0	0	0	0	0	0	943847	1.07115e+07	2.90172e+07	3.39462e+07	6.66856e+07	6.72821e+07	3.37449e+07	18972.1
739	0	0	0	0	0	0	0	6.29824e+06	5.11886e+07	5.09252e+07	2.19231e+06	0	0	0	0	0	0	0	0	1.77516e+07	2.30491e+07	657885	7335.16	0	0	0	0	0	0	0	3502.41	7060.96	2.43813e+07	2.79e+07	702276	0
740	0	0	0	0	0	0	0	3.75134e+06	640196	0	0	0	0	0	0	0	0	0	0	0	0	0	0	0	0	0	0	0	0	0	2.19842e+07	2.31916e+07	8.4461e+07	4.27143e+07	1.38588e+07	2.64764e+06
741	705247	0	0	0	0	0	0	0	0	0	0	0	0	0	0	0	0	0	0	0	0	2.13861e+07	0	0	0	0	0	0	1172.27	160500	1.10273e+07	6.29112e+06	1.11784e+07	2.59443e+06	9479.83	0
742	0	0	0	0	0	0	0	0	0	0	0	0	0	0	0	0	0	0	0	0	0	0	0	0	0	0	0	0	0	0	20988.1	647293	651558	3667.23	14668.4	0
743	0	0	0	0	637602	3.77081e+06	4.85329e+07	8.40314e+07	4.25095e+07	783406	0	0	4.72798e+06	4.04129e+06	10800.2	8.95652e+06	15365.9	1.28736e+06	2.52949e+06	1.66006e+07	8.57271e+07	5.34564e+07	8.45026e+06	11284.1	0	0	0	0	0	0	5.46087e+06	4.4659e+07	2.88054e+07	9.16182e+07	1.97843e+07	8.28365e+06
744	0	0	0	0	0	0	0	0	1.95033e+07	2.17436e+07	0	0	0	0	0	0	0	0	0	640320	24660.1	657983	0	0	0	0	0	0	0	8967.38	9.82777e+06	1.40485e+07	2.31855e+07	7.03513e+07	669507	0
745	0	0	0	0	0	0	0	0	0	0	0	0	0	0	0	0	0	1.87805e+06	2.22751e+07	8.80661e+07	2.89093e+07	3656.6	0	0	0	0	0	0	945631	2.01171e+07	4.09483e+07	6.01619e+07	5.4204e+07	3.18043e+07	16772.2	0
746	0	0	0	0	0	0	0	0	0	0	0	0	2.58823e+06	0	0	0	0	0	1.07883e+07	2.77308e+07	637926	0	0	0	0	0	0	0	0	0	0	0	1171.75	2.77464e+07	2.42421e+07	0
747	0	0	0	0	0	0	3.59999e+07	8.51461e+07	6.45207e+07	2.97051e+07	4.25366e+06	0	0	0	0	0	0	0	3.06618e+06	1.29465e+06	4.00156e+07	15441.1	0	0	0	0	0	0	0	0	6.08105e+06	5.15128e+06	9.2475e+07	8.61941e+07	1.48678e+07	0
748	0	0	0	0	0	44048.1	1.15558e+07	3.49301e+07	4725.8	0	0	0	0	0	0	0	0	0	4.8479e+06	1.83985e+07	6.17422e+07	5.01391e+07	1.01229e+07	0	0	0	0	0	0	0	2.39914e+07	5.33157e+07	5.78555e+07	4.25392e+07	0	0
749	0	0	0	0	0	0	0	0	634113	0	0	0	732643	717173	648478	0	0	1.25649e+06	1.02473e+07	4.11374e+07	2.92203e+07	5.23482e+07	60446.9	0	1.00043e+07	10932.6	0	0	0	0	17461.5	3.22188e+07	6.1299e+07	4.32844e+07	647753	0
750	733712	0	0	0	0	628783	0	0	0	0	0	0	0	0	0	0	0	0	0	0	0	0	60513.3	0	0	2.63028e+06	1.16217e+07	4.1171e+07	3.81721e+07	15137.7	3504.56	0	0	0	60446.9	0
751	0	0	0	0	0	0	0	0	0	0	0	0	0	0	0	0	0	0	3.05215e+06	3.59973e+07	1.11288e+08	6.17362e+07	2.2774e+07	5.98959e+06	0	0	0	0	0	0	0	0	0	0	0	0
752	0	0	0	0	0	628762	2.62733e+07	5.32032e+06	4.18471e+07	2.3405e+07	702046	0	0	0	0	0	0	3.1427e+06	1.63425e+07	6.05453e+07	6.19676e+07	0	0	0	0	0	0	0	0	0	8.66392e+06	5.28589e+07	2.66211e+07	1.34019e+06	669725	0
753	0	0	0	0	0	0	0	8.84376e+06	653039	0	0	0	0	0	0	0	0	0	0	636818	1.06952e+07	2.12414e+07	16897.8	0	0	0	0	0	0	0	0	0	0	0	0	0
754	0	0	0	0	0	0	0	0	0	0	0	0	0	0	0	0	0	0	0	6.18108e+06	4.84103e+06	0	0	0	0	0	0	0	0	628038	1.93021e+07	5.29667e+07	7.62132e+07	6.95339e+07	3.28636e+06	0
755	0	0	0	0	0	628234	4.30332e+06	1.57059e+07	2.56463e+07	9.1027e+06	0	0	0	0	0	0	0	0	0	0	0	0	0	0	0	0	0	0	0	0	0	0	0	0	0	0
756	0	0	0	0	0	0	0	0	0	0	0	0	0	0	0	0	0	0	3.20618e+06	148141	3562.19	0	0	0	0	0	0	0	0	0	0	3.09581e+06	2.32132e+07	5.732e+07	3.87707e+06	0
757	0	0	0	0	0	0	0	0	7067.97	35905	0	0	0	0	0	0	0	0	657804	7.4917e+06	6.09255e+07	5.12105e+07	3.24348e+06	0	805923	729161	0	0	0	4.87605e+06	5.72678e+07	4.1753e+07	4.49446e+07	8.80704e+07	2.55342e+06	0
758	0	0	0	0	0	0	0	0	1172.12	0	0	0	0	0	0	0	0	0	0	0	0	900054	9.98645e+06	0	0	0	0	0	0	0	0	4.36473e+06	4.99356e+07	4.00159e+07	82544.6	0
759	0	0	0	0	0	0	0	0	3.10112e+06	676598	0	0	0	0	0	0	0	0	2.42568e+06	8.85272e+06	2.23671e+07	5.07615e+07	1.41923e+06	0	3693.28	60499.1	0	0	0	0	8.68518e+06	3.01601e+07	6.91724e+07	9.73182e+07	1.60828e+07	0
760	0	0	0	0	0	3.05832e+06	2.68594e+07	1.52776e+07	0	0	0	0	0	0	0	0	0	0	4.91307e+06	1.27444e+06	4.24559e+07	1.45362e+07	6.6217e+06	0	0	0	0	0	0	0	0	0	0	0	0	0
761	0	0	0	0	0	3.04614e+06	5.47668e+07	4.02609e+07	5.78e+07	6.85538e+07	2.41023e+07	4.83358e+06	0	0	0	0	0	0	0	0	0	0	0	0	0	0	0	0	0	0	6995.63	8.60163e+06	2.56453e+07	2.08333e+07	0	0
762	0	0	0	0	0	0	0	0	0	0	0	0	0	0	0	0	0	0	2.42612e+06	0	0	0	0	0	0	0	0	0	0	0	2.45585e+06	642095	0	0	0	0
763	0	0	0	0	0	0	0	0	0	0	0	0	0	0	0	0	0	0	1.26435e+06	5.49544e+06	0	0	0	0	0	0	0	0	0	0	24431.4	2.45958e+07	6.15825e+07	9.0322e+07	3.97649e+07	1.12445e+07
764	0	0	0	0	0	0	0	0	2.81304e+07	0	0	0	0	0	0	0	0	0	0	0	0	0	0	0	0	0	0	0	0	0	2.19084e+07	2.23443e+07	5.71071e+07	9.61203e+07	2.88275e+07	2.07574e+06
765	0	0	0	0	0	0	0	0	1.28833e+06	693324	0	0	0	0	0	0	0	0	0	0	0	0	0	0	3.47828e+06	298969	658416	0	3.10999e+06	17423.5	9.84949e+06	9.715e+06	2.72894e+07	2.02779e+07	0	0
766	10992.3	0	0	643657	1.32169e+07	2.28359e+07	6.40029e+07	0	0	3663.55	0	0	0	0	0	0	2.47053e+06	643257	0	0	0	0	0	0	0	0	0	0	0	628407	2.07934e+07	3.86422e+07	1.11276e+07	4.02413e+07	0	0
767	0	0	0	0	0	0	0	0	9.91165e+06	3.19732e+06	0	0	0	0	0	0	0	15127.2	9.6965e+06	3.96743e+07	5.70073e+07	5.45925e+07	0	0	0	0	0	0	0	0	0	1.00799e+07	2.8806e+07	5.66852e+07	0	0
768	0	0	0	0	0	0	0	0	0	0	0	0	0	0	0	0	0	0	0	0	0	0	729548	1.48396e+06	0	0	0	0	0	0	7007.58	5.98269e+07	5.11679e+07	6.08743e+07	683378	0
769	0	0	0	0	0	0	15088.9	4.62119e+07	5.23597e+07	0	0	0	0	0	0	0	0	0	0	15282.2	1.27358e+06	1.49057e+07	1.1945e+07	0	0	0	0	0	0	0	7.25982e+06	0	0	0	0	0
770	0	0	0	0	0	642056	625490	635465	1.11095e+07	1.73539e+07	1.38645e+06	0	0	0	0	0	0	0	0	0	0	0	0	0	0	0	0	0	0	0	0	0	15353	0	0	0
771	0	0	0	0	0	0	0	0	0	0	0	0	0	0	0	0	0	1153.61	1.08784e+07	3.29983e+06	2.46692e+06	2.54557e+06	0	0	0	0	0	0	0	0	0	0	0	0	0	0
772	0	0	0	0	0	0	3.0293e+06	1.31826e+07	0	664867	7384.01	0	0	0	0	0	0	0	0	0	0	0	0	0	0	0	0	0	0	11265.5	3.24998e+07	6.03983e+07	6.49366e+07	6.13226e+07	1.59374e+07	0
773	0	0	0	0	0	0	0	0	1.29533e+06	0	0	0	0	0	0	0	0	8962.31	0	0	3.2452e+06	8.24461e+06	4.75232e+06	760438	0	0	0	0	0	0	0	0	0	0	0	0
774	0	0	0	0	0	1.25784e+06	3.68335e+06	8.83632e+06	0	0	0	0	0	0	0	0	0	0	0	0	0	0	0	0	0	0	0	0	0	0	0	0	0	0	0	0
775	0	0	0	0	0	0	0	0	0	0	0	0	0	0	0	0	0	629230	3.13858e+07	1.05358e+08	4.7271e+07	6.39748e+06	0	0	733196	0	0	0	0	0	4.85794e+06	7.31139e+07	7.11155e+07	8.12181e+07	9.94591e+06	1260.79
776	0	0	0	0	0	0	0	0	0	0	0	0	0	0	0	0	0	0	8.67811e+06	0	0	0	0	0	0	0	0	0	0	0	0	0	1.82741e+07	8.93292e+06	0	0
777	0	0	0	0	0	0	8.66581e+06	3.80066e+07	9.3769e+06	5.73587e+06	0	0	0	0	0	0	0	8960.82	2.32183e+07	8.9685e+07	7.13418e+07	6.48701e+07	1.99919e+07	769822	0	0	0	0	0	0	0	2.46764e+06	0	0	0	0
778	0	0	0	0	0	0	0	0	0	0	0	0	0	0	0	0	0	1.08609e+07	2.86221e+07	6.78699e+07	7.19312e+07	4.61952e+07	1215.79	0	0	0	0	0	0	0	0	0	0	6.98689e+06	1.43988e+07	0
779	0	0	0	0	0	0	0	0	0	0	0	0	0	0	0	0	0	0	0	0	1.5573e+07	8.18841e+06	60503.8	0	1.52774e+06	3690.01	0	0	0	0	2.43025e+06	2.46182e+06	5.50197e+07	5.1946e+07	734759	2.65125e+06
780	0	0	0	0	0	0	0	0	0	0	0	0	0	0	0	0	0	0	626803	3.08352e+06	632977	0	0	0	0	0	0	0	0	0	1.26856e+07	5.05001e+07	7.41945e+07	7.93845e+07	971437	7.78773e+06
781	0	0	0	0	0	625959	0	0	0	0	0	0	0	0	0	0	0	0	786568	0	0	0	0	0	0	0	0	0	0	0	0	0	0	0	0	0
782	0	0	0	0	0	0	630171	2.45745e+06	1.04424e+07	0	0	0	0	0	0	0	0	0	1.10186e+07	2.45615e+07	0	0	0	0	0	0	0	0	0	0	0	3546.55	1.30434e+06	5.10618e+06	2.10002e+06	0
783	0	0	0	0	0	0	0	0	0	0	0	0	0	0	0	0	0	4.49424e+06	7.33744e+07	3.43452e+07	6.55753e+07	2.66351e+07	2.80651e+06	0	0	0	0	0	0	0	0	0	0	0	0	0
784	0	0	0	0	0	0	0	9.27332e+06	5.8416e+07	4.04493e+07	2.62934e+07	2.56305e+06	0	0	0	0	1.42801e+06	1.4778e+07	627109	0	1171.31	1.43142e+06	0	0	727650	60480.1	0	0	0	649014	1.04071e+07	0	0	0	0	0
785	0	0	0	0	0	0	0	0	0	0	0	0	4.08682e+06	0	0	0	0	0	0	16496.8	1.60535e+07	1.88295e+07	3.51713e+07	2.65373e+07	0	0	0	0	0	0	0	0	0	0	0	0
786	0	0	0	0	0	0	0	0	639104	0	0	0	0	0	0	0	0	0	3497.81	1.05857e+07	637347	1.17316e+07	14612.8	0	0	0	0	0	0	0	0	5.59191e+06	1.38337e+07	1.49644e+07	2.06742e+07	0
787	0	0	0	0	0	627646	4.12986e+07	4.7885e+07	1.38113e+07	5.45749e+06	24096.4	0	0	0	0	0	0	0	0	0	646837	7284.42	0	0	0	0	0	0	0	628685	3.04304e+06	3.16181e+07	2.7741e+07	4.5881e+07	739136	0
788	0	0	0	0	0	0	2.42332e+06	2.45327e+06	0	0	0	0	0	0	0	0	0	144121	3.76843e+07	6.14691e+07	9.16436e+07	8.22337e+07	3.13142e+07	5.30799e+06	0	0	0	0	0	0	3497.81	1.2203e+07	3.92452e+07	1.10365e+08	2.71488e+07	1.601e+07
789	0	0	0	0	0	0	0	636876	0	0	0	0	0	0	0	0	0	0	0	0	15358.7	2.54885e+06	702081	0	1.51466e+06	0	0	0	0	0	143792	3.87121e+07	5.15574e+07	7.06256e+07	1.23625e+07	2.22674e+06
790	0	0	0	0	0	0	15050.6	654239	2.88064e+07	3.86176e+06	0	0	0	0	0	0	0	0	0	0	0	0	60521.2	0	0	0	0	0	0	0	8.05003e+06	1.30083e+07	0	0	0	0
791	0	0	0	0	0	0	0	3.0943e+06	0	60023.7	0	724223	0	0	0	0	638797	2.51125e+07	1.16469e+07	4.94156e+07	4.31587e+07	7.05443e+06	0	0	0	0	0	0	0	0	0	0	0	2.05296e+07	0	0
792	0	0	0	0	0	2.1716e+07	6.62152e+07	8.83294e+07	3.73554e+07	2.48674e+07	73904	1132.64	0	0	0	0	0	0	2.76283e+07	4.59697e+07	3.71358e+07	3.83607e+06	0	0	2.30256e+07	1.43368e+07	8.34424e+06	2.40557e+07	2.07428e+07	3.19975e+06	4.31967e+07	9.96758e+07	6.46598e+07	8.89778e+07	2.81189e+07	3.33455e+06
793	0	0	0	0	0	0	0	0	0	0	0	0	0	0	0	0	0	0	0	0	0	0	0	0	3.8962e+06	0	0	0	0	8959.03	658121	8.85815e+06	3.11032e+06	1.27539e+07	69737.4	3802
794	0	0	0	0	0	0	3.74602e+06	641346	0	0	0	0	0	0	0	0	0	0	0	1.28882e+06	25624.4	2413.4	0	0	0	0	0	0	0	0	10489.5	1.33655e+06	6.03424e+07	2.62607e+07	6.91999e+06	2.64848e+06
795	0	0	0	0	0	1155.16	0	0	0	0	0	0	10993.6	0	0	0	0	0	0	3.0961e+06	0	3667.84	0	0	0	0	0	0	0	2304.89	3.02679e+07	5.432e+07	7.90866e+07	1.48992e+07	1.4589e+06	0
796	0	0	0	0	0	0	0	0	0	0	0	0	0	0	0	0	0	0	0	0	0	0	0	0	0	0	0	0	0	0	0	31407.5	3.9777e+07	7.40851e+07	2.55864e+06	0
797	0	0	0	0	0	0	0	633839	4.775e+07	8.17163e+07	9.5788e+06	703464	0	0	0	0	0	0	0	0	0	0	0	0	0	0	0	0	0	786901	1.5099e+07	6.566e+06	1.69786e+07	2.04131e+07	0	0
798	0	0	0	0	0	0	0	0	0	0	0	0	0	0	0	0	0	0	0	36885.7	1.68603e+07	9.14476e+06	0	0	0	0	0	0	0	0	5.47274e+06	1.52322e+07	3.77994e+07	1.19546e+07	0	0
799	0	0	0	0	0	0	0	7.40331e+06	6.12601e+07	4.08451e+07	1.15009e+07	0	0	0	0	0	0	0	0	23533.6	3.67964e+07	5.76918e+06	0	0	0	0	0	0	0	0	5.47304e+06	4.86864e+06	660732	1.17823e+07	0	0
800	0	0	0	0	0	1154.83	5.46346e+06	28180.9	47128.8	0	0	0	0	0	0	0	0	0	0	0	637403	7283.17	0	0	0	0	0	0	0	0	0	0	0	0	0	0
801	0	0	0	0	0	0	0	0	0	0	0	0	0	0	0	0	0	0	0	0	0	0	0	0	0	0	0	0	0	0	2.43973e+06	643214	2.02488e+07	6.42895e+06	0	0
802	0	0	0	0	0	2.42885e+06	3.1895e+07	4.91553e+07	4.73707e+07	1.46466e+07	863493	0	0	0	0	0	0	0	0	10580.5	1.51189e+07	9390.59	0	0	0	0	0	0	0	0	0	0	0	0	0	0
803	0	0	0	0	0	0	0	0	0	0	0	0	0	0	0	0	0	0	0	3.11744e+06	646081	0	0	0	0	0	0	0	15342.4	3.2014e+06	4.53439e+07	1.78662e+07	5.17043e+07	5.60921e+07	4.97933e+07	2.65223e+06
804	0	0	0	0	0	0	0	0	0	0	0	0	0	0	0	0	0	0	1.16222e+07	3.28513e+07	5.78046e+07	2.533e+06	0	0	704398	0	0	0	0	0	146146	8.62299e+06	7.32362e+06	0	0	0
805	0	0	0	0	0	0	0	0	0	0	0	0	0	0	0	0	0	0	8.67219e+06	672978	1.25552e+07	2.05607e+06	4885.99	0	0	0	0	0	0	0	10461.2	6.16578e+07	8.47942e+07	6.10114e+07	2.76646e+07	1.49424e+06
806	0	0	0	0	0	0	0	0	0	6.51194e+06	0	0	0	0	0	0	1173.37	1.48616e+07	4.83601e+07	3.53933e+07	4.39129e+07	5.25608e+07	0	0	0	0	0	0	0	0	0	2.43929e+06	0	0	0	0
807	0	0	0	0	0	0	0	0	1170.05	0	0	0	0	0	0	0	0	0	0	1.26651e+06	4.22355e+07	5.32318e+07	6.62719e+06	837383	0	0	0	0	0	0	1.23512e+07	6.13281e+06	2.05583e+07	15729.4	0	0
808	732957	0	0	0	0	0	15065.9	0	0	0	0	0	0	0	0	0	0	0	0	0	3.14221e+06	3.63312e+07	2.12141e+06	0	0	0	0	0	0	0	20948.8	8.62225e+06	4.92484e+07	5.53571e+07	5.17137e+06	0
809	0	0	0	0	0	0	0	0	0	0	0	0	0	0	0	0	0	0	0	0	0	0	0	0	0	0	0	0	0	0	8.69366e+06	3.26628e+07	3.13146e+07	6.04048e+07	2.51553e+07	0
810	0	0	0	0	0	0	0	0	0	0	0	0	0	0	0	0	0	143133	9.36324e+06	2.8553e+07	8.27235e+07	4.85421e+07	6.1198e+06	0	0	0	0	0	0	0	0	10607.4	0	7284	13161.9	4.15332e+06
811	0	0	0	0	0	0	0	0	0	0	0	0	0	0	0	0	0	0	0	0	0	0	0	0	0	0	0	0	0	174418	4.11333e+07	8.17431e+07	7.1535e+07	5.90857e+07	3.76757e+06	5.2789e+06
812	0	0	0	0	9116.91	7.00857e+06	0	0	0	0	0	0	0	0	0	0	0	0	0	0	0	0	0	0	0	0	0	0	0	0	0	0	3561.27	2.5602e+06	782207	0
813	0	0	0	0	0	2.43266e+06	639580	0	0	0	0	0	0	0	0	0	0	0	8.6809e+06	0	0	0	0	0	0	0	0	0	0	0	0	0	3.07124e+07	5.89177e+07	0	9852.9
814	0	0	0	0	0	0	0	0	2.46618e+06	0	0	0	0	0	0	0	0	938445	2.07393e+07	0	0	0	0	0	0	0	0	0	0	0	0	0	0	0	0	0
815	0	0	0	0	0	0	0	0	0	0	0	0	0	0	0	0	0	0	0	0	0	0	0	0	0	0	0	0	0	1154.83	8.0309e+06	4.08103e+07	5.17431e+07	1.85624e+07	0	0
816	0	0	0	0	0	0	0	0	0	0	0	0	0	0	0	0	0	0	0	0	0	8493.6	0	0	0	0	0	0	0	0	13968.8	0	5.66087e+06	7.58265e+07	0	0
817	0	0	0	0	0	0	626509	0	0	0	0	0	0	0	0	0	0	0	0	0	0	0	0	0	0	0	0	0	0	1.40259e+06	3.21796e+07	4.32552e+07	4.60449e+07	8.6037e+07	3.53232e+07	2.62632e+07
818	0	0	0	0	0	0	1.3527e+07	8.83409e+06	0	0	10946.7	826974	0	0	0	0	0	0	0	2.52371e+07	7.09601e+07	3.8025e+07	5.1264e+06	0	0	0	0	0	0	0	0	14123.1	2.91603e+07	5.87349e+07	733683	0
819	0	0	0	0	0	0	0	0	0	1.32746e+06	2.22896e+06	7587.4	0	0	0	0	0	0	0	0	8.85138e+06	2.63359e+06	2.96639e+06	0	0	0	0	0	0	0	0	2.47781e+06	11415.9	4.19457e+06	0	0
820	0	0	0	0	0	628685	3.0187e+06	0	0	0	0	0	0	0	0	0	0	0	1.89347e+06	2.70159e+07	5.66851e+07	3.40944e+07	1.12542e+07	0	0	0	0	0	0	0	0	6.78959e+06	4.07839e+07	0	0	0
821	0	0	0	0	0	0	0	0	0	0	0	0	0	0	0	0	0	0	0	0	0	0	0	0	0	0	0	0	0	1154.57	0	0	15327.1	1.80726e+07	3.34686e+06	2.64572e+06
822	0	0	0	0	0	0	0	0	0	0	0	0	0	0	0	0	0	0	2.23471e+07	3.5185e+07	7.75463e+07	7.86261e+07	1.94651e+07	22353	0	0	0	0	0	0	1.47839e+07	2.19363e+07	8.71451e+07	6.5931e+07	2.11747e+07	7591.54
823	0	0	0	0	0	0	0	0	0	0	0	0	0	0	0	0	0	0	0	0	0	32821	0	0	0	0	0	0	0	0	0	0	0	0	0	0
824	0	0	0	0	0	0	0	0	0	2.54208e+06	0	0	0	0	0	0	0	0	0	0	0	3.20913e+06	1.39675e+06	686830	0	0	0	0	0	4.94649e+06	4.07091e+07	2.40164e+07	4.49553e+07	2.60572e+07	2.10487e+06	3.38074e+06
825	0	0	0	0	0	3.67875e+06	3.91822e+07	2.56953e+07	3.71618e+07	7.8499e+06	0	0	0	0	0	0	0	0	0	0	0	0	0	0	0	0	0	0	0	0	2.4245e+06	1.80272e+07	5.7843e+07	5.61329e+07	4.37604e+07	2.10344e+07
826	0	0	0	0	1.28207e+06	1.9974e+07	6.39731e+07	2.99682e+07	3.43483e+07	3.95792e+07	0	0	0	0	0	0	0	0	0	0	0	0	0	0	0	0	0	0	0	0	2.42933e+06	5.52542e+06	0	0	0	0
827	0	0	0	0	0	0	3.0491e+06	0	0	0	0	0	0	0	0	0	0	0	0	0	9.43617e+06	1.4448e+06	1.5501e+06	0	0	0	0	0	0	0	643527	6.1042e+07	5.25483e+07	2.54304e+06	0	0
828	0	0	0	0	0	0	0	0	0	0	0	0	0	0	0	0	0	0	0	0	0	14566.3	0	0	0	0	0	0	0	628861	5.46036e+06	1.03708e+07	3.90855e+07	5.79344e+07	4.92769e+06	0
829	0	0	0	0	0	0	15086.5	1169.68	0	0	0	0	0	0	0	0	0	0	0	0	0	0	3692.47	0	0	0	0	0	0	0	0	0	0	0	0	0
830	0	0	0	0	638719	0	1.25117e+06	0	0	0	0	0	0	0	0	0	0	0	0	3.08124e+06	4.37696e+06	4.51905e+06	0	0	0	0	0	0	0	0	626901	2.4722e+06	666353	1.75637e+07	0	0
831	0	0	0	0	0	0	0	0	0	0	0	0	0	0	0	0	0	0	15087.9	9.35679e+06	1.61117e+07	0	730359	0	0	0	0	0	0	0	0	0	16468	0	0	0
832	0	0	0	0	0	0	8.67275e+06	3.35138e+07	5.1462e+07	4.06759e+06	0	0	0	0	0	0	0	0	0	32982.4	1.50375e+07	1.74519e+07	9.24849e+06	0	0	0	0	0	0	0	0	0	0	0	0	0
833	0	0	0	0	0	0	0	0	0	0	0	0	0	0	0	0	0	0	0	0	0	0	0	7592.78	0	0	0	0	0	0	0	0	3562.6	0	0	0
834	0	0	0	0	0	0	0	15319.5	2.54884e+06	0	0	0	0	0	0	0	0	0	2.45308e+07	5.996e+07	4.75377e+07	4.68214e+07	1.36699e+07	0	0	0	0	0	0	0	0	3.74167e+06	0	0	0	0
835	0	0	0	0	0	15130	0	0	0	0	0	0	0	0	0	0	0	0	6.2609e+06	645985	6.22013e+06	9.18228e+06	0	0	0	0	0	0	0	0	2.42104e+06	3.47647e+07	3.90647e+07	2.53398e+07	0	0
836	0	0	0	0	0	2.45265e+06	4.51775e+07	5.9539e+07	5.69593e+07	3.83714e+07	2.08838e+07	78913.4	0	0	0	0	0	0	8.67686e+06	2.06025e+07	6.48661e+07	5.10418e+07	1205.96	0	0	0	0	0	0	0	0	641486	3.05376e+07	3.47928e+07	7327.91	0
837	0	0	0	0	0	0	0	0	0	657689	0	0	0	0	0	0	0	0	1.04443e+07	3.70301e+07	7.94005e+07	1.71875e+07	2.57463e+06	0	0	0	0	0	0	2309.47	2.19539e+07	5.04062e+07	5.84137e+07	7.81173e+07	2.70273e+06	0
838	0	0	0	0	0	15112.3	1.3528e+07	5.51061e+06	0	0	0	0	0	0	0	0	0	0	0	0	0	0	0	0	0	0	0	0	0	0	174080	4.13658e+07	5.46043e+07	3.77138e+07	76238.5	0
839	0	0	0	0	0	0	0	0	3.91474e+07	665291	0	0	0	0	0	0	0	0	3.8367e+06	3.27807e+07	9.1141e+06	0	0	0	0	0	0	0	0	0	18509.6	2.82774e+07	6.46728e+07	5.39688e+07	0	0
840	0	0	0	0	0	0	10506.3	2.48548e+06	0	0	0	0	0	0	0	0	0	0	0	0	0	0	0	0	0	0	0	0	0	0	0	4.98887e+06	1.24363e+07	8.91795e+06	0	0
841	0	0	0	0	0	0	0	0	0	0	0	0	0	0	0	0	0	0	4.29369e+06	10494.5	0	0	0	0	0	0	0	0	0	0	0	0	0	0	0	0
842	0	0	0	0	0	0	0	0	0	0	0	0	0	0	0	0	0	0	0	636798	2.46498e+06	0	0	0	0	0	0	0	0	0	13976.4	2.83797e+07	3.79281e+07	6.00863e+07	1.34663e+06	0
843	0	0	0	0	0	2.49759e+06	4.23862e+07	3.23632e+07	0	0	0	0	0	0	0	0	15376.4	144333	4.44479e+07	5.72272e+07	5.71363e+07	7.50386e+07	3.09272e+07	11284.3	0	0	0	0	0	1153.94	1.20516e+07	1.70888e+07	3.24074e+07	6.65212e+07	661726	0
844	0	0	0	0	0	1154.98	1.65207e+07	6.28094e+07	5.86839e+07	1.31445e+06	0	0	0	0	0	0	0	0	0	8.87674e+06	2.98512e+07	1.35867e+06	0	0	0	0	0	0	0	0	0	8.59313e+06	1.58427e+07	3.36445e+07	5.52694e+06	0
845	0	0	0	0	0	0	0	0	3.72412e+06	665769	0	0	0	0	0	0	0	0	0	0	0	0	0	0	0	0	0	0	639578	7.36566e+06	3.09848e+07	1.89504e+07	3559.33	0	0	0
846	0	0	0	0	0	0	0	0	0	0	0	0	0	0	0	0	0	0	0	3.72788e+06	4.73365e+07	2.2966e+07	0	0	0	0	0	0	0	0	0	16470.9	2.98682e+07	3.0581e+07	60115.3	0
847	0	0	0	0	0	0	0	0	0	0	0	0	0	0	0	0	0	0	3502.82	14163.6	3.76843e+07	4.21839e+07	5.7038e+06	0	0	0	0	0	0	0	0	0	0	0	0	0
848	0	0	0	0	0	0	0	1.92368e+06	18890.2	1.57187e+06	23930.4	0	0	0	0	0	0	0	626960	0	4.34522e+06	0	0	0	0	0	0	0	0	0	0	0	0	0	0	0
849	0	0	0	0	0	0	0	0	0	0	0	0	0	0	0	0	0	0	0	0	0	0	0	0	0	0	0	0	0	0	0	1.24158e+07	7.15377e+07	9.13774e+06	0	0
850	0	0	0	0	0	0	623276	2.99335e+07	650917	0	0	0	0	0	0	0	0	0	0	0	0	0	0	0	0	0	0	0	0	0	0	0	0	0	0	0
851	0	0	0	0	0	0	0	0	0	0	7334.33	0	0	0	0	0	1172.34	670215	2.64267e+07	5.67016e+07	24672.1	1.96275e+07	5.81282e+06	0	0	0	0	0	0	0	0	0	0	0	0	0
852	0	0	0	0	0	0	0	0	0	0	0	0	0	0	0	0	0	0	0	0	0	0	0	0	0	0	0	0	0	0	641997	1.55811e+07	6.099e+07	6.31673e+07	89633.9	0
853	0	0	0	0	0	0	0	0	0	8.28054e+06	0	0	0	0	0	0	0	0	0	0	3.75673e+06	0	0	0	0	0	0	0	0	3.05227e+06	1.65492e+07	8.08472e+07	4.31347e+07	1.084e+08	793545	0
854	0	0	0	0	0	0	0	0	0	0	0	0	0	0	0	0	0	0	0	0	0	5.10819e+06	7.21982e+06	0	0	0	0	0	0	0	142558	1169.31	2.89638e+07	8.12182e+07	1.67791e+07	0
855	3709.94	0	0	0	0	3.06951e+06	2.74792e+07	1.27629e+06	3.72815e+07	4.51282e+07	2.58186e+07	825981	0	0	0	0	0	0	0	0	0	10927.1	0	0	0	0	0	0	0	0	4.30035e+06	1.31553e+07	3.36061e+07	7.90315e+07	4.04432e+06	7591.96
856	0	0	0	0	0	0	1.24916e+06	3.71997e+06	0	0	0	0	0	0	0	0	0	0	0	8.84037e+06	1.63024e+07	0	0	0	0	0	0	0	0	0	0	0	0	0	0	0
857	0	0	0	0	0	0	0	0	0	0	0	0	0	0	0	0	0	0	0	0	0	0	0	0	0	0	0	0	0	0	6.10798e+06	1.46865e+07	7.46471e+07	3.4938e+07	2.31113e+07	7.31094e+06
858	0	0	0	0	0	0	0	0	0	0	0	0	0	0	0	0	0	0	0	0	0	0	0	0	0	0	0	0	0	0	0	1.42065e+06	3.17891e+06	0	0	0
859	0	0	0	0	0	1.35736e+07	2.65063e+07	6.17112e+07	7.94625e+07	3.6013e+07	3.7842e+07	1.20909e+07	0	0	0	0	0	0	5.49798e+06	0	2.46492e+06	1.42093e+07	0	0	0	0	0	0	0	0	0	0	1.25713e+07	3.38846e+07	0	0
860	0	0	0	0	0	0	0	840272	1.43601e+07	60056.8	0	0	0	0	0	0	0	0	23983.8	3.8932e+07	4.91129e+07	5.73869e+07	2.69063e+07	2.62863e+06	0	0	0	0	0	0	0	8218.21	7.50845e+06	19038.1	3692.06	0
861	1105.1	0	0	0	0	0	0	0	0	0	0	0	0	0	0	0	0	0	0	0	1.04528e+07	3645.26	0	0	0	0	0	0	0	0	0	0	15357.7	3.39901e+07	701081	0
862	0	0	0	0	0	0	2.42487e+06	10251.3	0	0	0	0	0	0	0	0	0	0	0	0	0	0	0	0	0	0	0	0	0	0	0	2.47042e+06	3.04283e+07	4.30683e+07	1.06784e+07	0
863	0	0	0	0	0	0	0	0	0	0	0	0	0	0	0	0	0	0	0	0	0	0	0	0	0	0	0	0	0	0	1.10823e+07	4.1381e+07	4.38434e+07	5.42545e+07	0	0
864	0	0	0	0	0	0	0	0	0	0	0	0	0	0	0	0	0	628861	1.76891e+07	4.04387e+07	5.66067e+07	8.26624e+06	0	0	0	0	0	0	0	0	0	0	0	0	0	0
865	0	0	0	0	0	0	0	792428	0	0	0	0	0	0	0	0	0	0	0	0	15352	1.10424e+07	18202.4	0	0	0	0	0	0	0	0	0	3.71907e+07	5.79666e+07	2.59124e+06	1264.22
866	0	0	0	0	0	0	0	0	0	0	0	0	0	0	0	0	0	0	0	636857	0	0	730469	0	0	0	0	0	0	0	0	0	0	9.18291e+06	0	0
867	0	0	0	0	0	0	0	0	0	0	0	0	0	0	0	0	0	0	0	0	1170.64	5.26244e+06	15926	0	0	0	0	0	0	1.41912e+06	1.95708e+07	2.81049e+07	2.36923e+07	3.43843e+07	0	0
868	0	0	0	0	0	0	0	0	0	0	0	0	0	0	0	0	0	0	0	0	0	0	0	0	0	0	0	0	0	0	0	0	0	0	0	0
869	0	0	0	0	0	0	3.66335e+06	1.35062e+07	636622	0	0	0	0	0	0	0	0	0	0	0	1.63869e+07	689748	3692.26	0	0	0	0	0	0	0	0	3.10319e+06	3.91586e+07	3.22796e+07	34115.3	0
870	0	0	0	0	0	0	0	2.4276e+06	2.78107e+07	8.97512e+07	1.34457e+07	0	0	0	0	0	0	0	0	0	0	0	0	0	0	0	0	0	0	0	1.5945e+07	2.46939e+06	0	19512.3	0	0
871	0	0	0	0	0	0	0	4663.5	0	0	0	0	0	0	0	0	0	0	0	0	0	0	0	0	0	0	0	0	0	0	0	0	0	0	0	0
872	0	0	0	0	0	0	0	0	0	0	0	0	0	0	0	0	0	0	0	0	0	0	0	0	0	0	0	0	0	0	0	1.01106e+07	1.17641e+07	4.99328e+07	2.56298e+06	0
873	0	0	0	0	0	0	0	0	0	0	0	0	0	0	0	0	0	0	0	0	0	0	0	0	0	0	0	0	0	0	629210	0	1.35486e+07	7.0326e+07	2.4962e+06	0
874	0	0	0	0	0	0	0	0	2.55356e+06	4.10712e+06	3.10475e+07	1.60706e+06	0	0	0	0	0	636908	9.85689e+06	7.83991e+07	6.19692e+07	6.04891e+07	8.25969e+06	0	0	0	0	0	0	15111.8	3.83778e+06	2.45945e+06	9.51048e+06	1.36551e+07	0	0
875	0	0	0	0	0	0	0	0	0	2.54282e+06	1099.92	0	0	0	0	0	0	0	0	0	0	0	0	0	0	0	0	0	0	0	6.76243e+06	3.82672e+07	4.33782e+07	8.88259e+07	7.57186e+06	0
876	0	0	0	0	0	0	0	0	0	0	0	0	0	0	0	0	0	5.49476e+06	3.89645e+07	8.16121e+07	8.08716e+07	2.69897e+07	1.26163e+07	155576	0	0	0	0	0	626980	0	0	0	657963	60470.6	723781
877	0	0	0	0	0	0	0	0	0	0	0	0	0	0	0	0	0	0	0	0	0	0	0	0	0	0	0	0	0	0	0	4.91605e+06	7.40839e+06	0	0	0
878	0	0	0	0	0	0	0	0	0	1.31283e+06	3.21244e+06	1129.61	0	0	0	0	0	0	0	1.94226e+06	0	0	0	0	0	0	0	0	0	0	0	0	655374	0	0	0
879	0	0	0	0	0	0	0	0	0	0	0	0	0	0	0	0	0	0	6997.26	0	1.17155e+07	3.30069e+07	4.33338e+06	0	0	0	0	0	0	0	1151.17	2.46484e+06	4.55187e+07	4.48801e+07	0	0
880	0	0	0	0	0	0	0	0	6.19434e+06	0	0	0	0	0	0	0	0	0	0	0	0	0	0	0	0	0	0	0	0	1.53734e+06	143745	2.41895e+07	8.34559e+07	9.80177e+07	676442	24182.9
881	0	0	0	0	0	0	0	0	0	25252	7333.08	0	0	0	0	0	0	0	0	15320.9	3.08929e+06	0	0	0	0	0	0	0	0	0	2.41794e+06	7.32821e+06	0	0	0	0
882	0	0	0	0	9117.8	16290	3.24007e+07	1.76793e+07	0	0	0	0	0	0	0	0	0	0	0	15327.1	0	0	0	0	0	0	0	0	0	0	27975.4	77396.2	6.80852e+07	1.00723e+08	2.78425e+06	0
883	0	0	0	0	0	0	0	0	0	0	0	0	0	0	0	0	0	0	0	0	0	0	0	0	0	0	0	0	0	626451	3.42712e+07	7.42997e+07	8.96642e+07	8.8829e+07	9.92603e+06	0
884	0	0	0	0	0	0	0	0	0	0	0	0	0	0	0	0	0	0	0	0	0	3667.74	0	0	0	0	0	0	0	0	8.68865e+06	3.18635e+06	4.52206e+07	5.36153e+07	3.74371e+07	79894.5
885	0	0	0	0	0	0	0	0	0	0	0	0	5.82185e+06	1.72267e+06	0	0	0	0	0	0	637327	2.56911e+07	5.72753e+06	0	0	0	0	0	0	8.5694e+06	1.59141e+07	0	0	7282.97	2.56052e+06	0
886	0	0	0	0	0	0	0	1.91314e+06	4.94092e+06	3.36918e+07	814117	0	0	0	0	0	0	0	15081.2	0	0	0	0	0	0	7333.29	0	0	0	0	0	3545.94	3.15357e+07	5.83378e+07	6.74539e+06	0
887	0	0	0	0	0	0	0	0	0	0	0	0	0	0	0	0	0	0	0	0	0	0	0	0	0	0	0	0	0	0	7.90778e+06	2.64428e+07	2.30729e+07	7.12139e+07	3.2131e+06	0
888	0	0	0	0	0	0	0	0	0	0	0	0	0	0	0	0	0	0	0	0	0	3662.94	24190.2	0	0	0	0	0	0	0	1151.24	0	0	0	0	0
889	0	0	0	0	0	0	0	0	1.47479e+07	0	0	0	0	0	0	0	0	0	0	7004.42	654259	0	0	0	0	0	0	0	1173.08	50843.3	799974	4.78954e+07	5.27576e+07	23002.8	0	0
890	0	0	0	0	0	0	0	0	0	0	0	0	0	0	0	0	0	0	0	0	0	0	0	0	0	0	0	0	0	0	2.42838e+06	31721.7	1.87745e+07	3.56879e+07	0	0
891	0	0	0	0	0	0	0	0	0	0	0	0	0	0	0	0	0	0	3.68168e+06	1.87901e+07	6.53022e+07	1.0405e+07	0	0	0	0	0	0	0	0	32581.5	2.03903e+07	6.26751e+07	2.67031e+07	0	0
892	0	0	0	0	0	1153.5	4.03745e+07	8.11063e+07	666637	2.54134e+06	701940	0	0	0	0	0	0	0	0	0	0	9.1838e+06	0	0	60775.4	0	0	0	0	0	0	1.43874e+07	5.58437e+06	5.13868e+06	7333.29	0
893	0	0	0	0	0	0	0	0	0	0	0	0	0	0	0	0	0	0	0	2.48467e+06	3.71658e+07	7.96532e+07	1218.48	0	0	0	0	0	0	0	0	692077	7.70644e+07	6.2153e+07	677031	0
894	0	0	0	0	0	0	0	0	0	0	0	0	0	0	0	0	0	0	0	0	0	0	0	0	0	0	0	0	0	0	5.46991e+06	4.96048e+06	1.36948e+07	6.9724e+07	3.66348e+07	15131.5
895	0	0	0	0	0	0	9.90441e+06	740903	5.18282e+07	1.40297e+07	0	0	0	0	0	0	0	0	8.67263e+06	3.03612e+07	5.19083e+07	6.16604e+07	4.03615e+07	1.57599e+07	0	0	0	0	0	0	0	6.8019e+06	6.89255e+06	0	0	0
896	0	0	0	0	0	5.47389e+06	4.25674e+06	0	2.46662e+06	7280.48	0	0	0	0	0	0	0	16275.9	0	0	637445	0	0	0	0	0	0	0	646878	1.90024e+06	3.5346e+07	1.17827e+07	2.63197e+07	6.61246e+07	0	0
897	0	0	0	0	0	0	3.67972e+06	636465	0	0	0	0	0	0	0	0	0	0	0	0	0	0	0	0	0	0	0	0	0	0	2.42406e+06	28281.8	1.54595e+07	4.79691e+07	1.39211e+07	0
898	0	0	0	0	0	0	0	0	0	0	0	0	0	0	0	0	0	0	0	0	8.01447e+06	4.57355e+07	1.19799e+07	0	0	0	0	0	0	0	682454	5.66101e+06	2.76999e+07	3.09393e+06	0	0
899	0	0	0	7137.38	0	0	0	0	0	0	0	0	0	0	0	0	0	2307.77	6.22678e+06	6.91316e+07	6.65794e+07	6.04261e+07	1.00039e+07	2.70805e+06	0	0	0	0	0	0	0	0	2.54513e+07	3.72747e+07	136036	0
900	0	0	0	0	0	0	0	2.82683e+07	4.53155e+07	5.64095e+07	1.80808e+07	53424.3	0	0	0	0	0	0	0	0	0	0	0	0	0	0	0	0	0	0	6999.1	1.81199e+07	4.74762e+07	4.67698e+07	5.60775e+07	3.59426e+06
901	0	0	0	0	0	0	1.90537e+07	5.569e+07	4.68575e+07	2.18117e+07	2.25681e+07	2.77035e+06	0	0	0	0	0	0	9.12215e+06	3.30369e+07	8.68069e+06	661366	0	0	0	0	0	0	0	0	24365.6	14051.7	1.41327e+07	0	7334.53	0
902	0	0	0	0	0	0	5.44422e+06	7.41172e+06	1.92885e+07	7268.06	0	0	0	0	0	0	0	0	0	0	3.73985e+06	684510	2.04153e+06	2.63407e+06	0	0	0	0	647718	644464	4.2344e+06	5.5944e+06	7.21497e+07	5.3281e+07	1.97712e+07	764034
903	0	0	0	0	0	0	0	1.299e+06	1.23265e+07	3.19834e+06	4.67583e+06	1133.62	0	0	0	0	0	0	626157	0	0	0	0	0	0	0	0	0	0	0	15088	5.51309e+07	6.64334e+07	3.90553e+07	0	0
904	0	0	0	0	0	0	0	0	0	0	0	0	0	0	0	0	0	0	6949.33	2.11213e+07	6.46177e+07	5.3289e+07	4.25451e+06	2528.74	0	0	0	0	0	0	1.02833e+07	8.00811e+06	1.55278e+07	3.89435e+07	726659	0
905	0	0	0	0	0	0	0	0	6.83055e+06	0	0	0	0	0	0	2.48927e+06	15379.3	1.21681e+07	2.74562e+07	8.66412e+06	7101.79	0	0	0	0	0	0	0	0	0	0	0	0	0	0	0
906	0	0	0	0	0	0	2.41938e+06	811764	0	0	0	0	0	0	0	0	0	0	1151.28	0	0	0	0	0	0	0	0	0	0	0	2.44305e+06	1.7931e+07	3.77353e+07	2.80217e+07	1.56104e+07	0
907	0	0	0	0	0	0	0	0	1172.04	0	0	0	0	0	0	0	0	0	0	7054.95	8.85499e+06	10945.4	0	0	0	0	0	0	0	0	8.65513e+06	2.17756e+07	4.54508e+07	8.42505e+07	5.4327e+07	3.13138e+07
908	0	0	0	0	0	16293.3	1.24869e+06	1.23924e+07	4.20082e+07	2.73679e+07	170557	7577.25	0	0	0	0	0	0	2.41752e+06	1.85618e+07	7.71718e+07	6.29112e+07	1.33309e+07	3813.65	0	0	0	0	0	627293	7.83965e+06	7.95653e+06	2.23083e+07	0	0	0
909	0	0	0	0	0	0	2.41826e+06	3.62411e+07	7.07787e+07	2.08669e+07	2.61476e+06	0	0	0	0	0	0	0	0	8.6848e+06	5.03056e+07	1.17951e+07	4.594e+06	15172.3	0	0	0	0	0	0	0	4.95007e+06	4.0758e+07	1.61748e+07	0	0
910	0	0	0	0	0	0	0	0	0	0	0	0	0	0	0	0	0	1155.16	1.79477e+07	4.00787e+07	5.84426e+07	4.96773e+07	1.50615e+06	0	0	0	0	0	0	160198	2.49273e+07	2.59035e+07	9.6251e+07	7.50192e+07	4.5914e+07	5.04042e+07
911	0	0	0	0	0	0	1.67971e+07	8.44627e+07	6.3585e+06	5.05082e+06	0	0	0	0	0	0	0	0	20990.7	2.61123e+07	7.35175e+07	7.769e+07	2.09046e+07	5.70761e+06	0	0	0	0	0	0	0	9.57182e+06	658972	687688	0	9.6505e+06
912	0	0	0	0	0	1.39877e+06	2.80505e+07	7.82937e+07	5.08749e+07	1.17341e+07	152112	0	0	0	0	0	0	1.8058e+07	2.74066e+07	1.73106e+07	4.89324e+07	0	0	0	0	0	0	0	0	0	0	1.61951e+07	7.36664e+07	5.61959e+07	1.69904e+07	1.95368e+07
913	0	0	0	0	0	654038	6.95288e+07	4.31859e+07	8.10988e+07	0	0	0	0	0	0	0	0	0	1.27841e+06	3.26794e+07	8.48417e+07	4.70674e+07	1.69428e+07	9792.94	0	0	0	0	0	0	653538	1.85133e+07	3.1931e+07	5.62706e+07	1.18092e+07	1.43842e+06
914	0	0	0	0	0	0	4.25675e+06	2.18891e+07	1.66949e+07	1.8604e+07	15952.4	0	0	0	0	0	0	0	15085.5	1.94563e+06	1.96255e+06	7.67189e+06	7334.74	0	0	0	0	0	0	1152.5	3.18059e+07	5.15825e+07	4.71404e+07	1.16252e+08	7.64749e+06	0
915	0	0	0	0	0	0	0	0	0	0	0	0	0	0	0	0	0	0	3.7078e+06	1.39793e+07	4.18516e+07	6.62541e+07	673067	0	0	0	0	0	0	0	22033.2	2.74579e+07	7.66557e+07	4.48452e+07	0	0
916	0	0	0	0	0	0	0	1.37398e+07	4.12247e+07	3.26545e+06	50894.3	0	0	0	0	0	0	0	0	7.61269e+06	4.37638e+06	3.51415e+07	3.38357e+06	62467	0	0	0	0	0	0	0	0	2.84132e+07	3.58123e+07	1.0015e+07	0
917	0	0	0	0	0	4.9562e+06	2.06929e+07	7.95728e+07	3.05729e+07	3.82134e+07	729531	0	0	0	0	0	0	2.42041e+06	1.50052e+07	8.62201e+07	6.80199e+07	5.71951e+07	778106	0	1224.99	0	0	0	6.20509e+06	3.31443e+06	1.72247e+07	1.93813e+07	7.27572e+07	8.3597e+07	5.31773e+07	2.18062e+07
918	0	0	0	0	0	0	0	3.72852e+06	0	0	0	0	0	0	0	0	0	15131.5	4.41805e+07	2.49343e+06	654962	0	0	0	0	0	0	0	0	0	17462.2	2.64491e+07	3.31476e+07	2.01714e+07	2.55569e+06	3816.61
919	0	0	0	0	0	0	652305	3.93712e+07	7.66907e+07	3.56821e+07	0	0	0	0	0	0	0	0	0	2.0223e+07	5.61192e+07	6.95339e+07	1.20067e+07	70033.4	0	0	0	0	0	0	0	636837	0	0	0	0
920	0	0	0	0	0	0	2.13525e+07	4.68272e+07	7.69685e+07	5.64202e+07	4.44671e+07	9.48831e+06	0	0	0	0	0	0	0	9.44937e+06	5.0188e+07	6.40918e+06	63858.6	0	0	0	0	0	0	0	10489.5	1.415e+07	4.03016e+07	17014.5	0	0
921	0	0	0	0	0	0	0	0	784954	15813.6	0	0	0	0	0	0	0	0	0	0	3507.49	0	60521.2	0	0	0	0	2.48809e+06	2331.12	1.28285e+07	4.88869e+07	1.61679e+07	3.7607e+07	4.77059e+07	2.7986e+07	9.54841e+06
922	0	0	0	0	0	0	0	0	0	0	0	0	0	0	0	0	0	8.74089e+06	8.53133e+06	1.60493e+07	2.16237e+07	6.89458e+07	1.14877e+07	0	0	0	0	0	0	0	0	1.01023e+07	5.54362e+06	0	0	0
923	0	0	0	0	0	643162	4.27931e+06	2.43721e+07	4.62293e+07	1.56693e+07	7331.43	0	0	0	0	0	0	0	0	0	0	0	0	0	0	0	0	0	0	16274.2	1.08673e+07	2.70632e+07	1.73768e+07	3.68414e+07	0	0
924	0	0	0	0	0	0	0	1166.69	1.47885e+07	2.49669e+07	7333.5	0	0	0	0	30993.9	657701	5.94092e+07	6.79968e+07	6.70898e+07	6.4747e+07	6.05586e+07	1.22963e+07	11408.5	0	0	0	0	0	6.69477e+06	1.41449e+07	7.1775e+07	4.64583e+07	0	7333.91	0
925	0	0	0	0	0	0	0	1.93844e+07	7.61126e+07	2.00823e+07	0	62482.8	0	0	0	0	0	0	0	0	0	0	0	0	0	0	0	0	0	0	0	0	0	0	0	0
926	0	0	0	0	0	0	0	0	636739	8491.62	7335.16	753501	0	0	0	0	0	0	6.05361e+06	2.56557e+07	9.28e+07	3.3467e+07	1.4602e+06	0	0	0	0	0	0	0	5.45213e+06	3.59597e+07	5.52517e+07	6.3392e+07	1.59809e+06	2.15254e+06
927	0	0	0	0	0	0	0	0	0	0	0	0	0	0	0	0	0	0	1.70624e+07	1.73628e+07	5.44955e+07	5.65499e+07	3.30542e+06	0	0	0	0	0	0	0	0	5.52638e+06	3.29637e+07	5.74287e+06	3.34351e+06	0
928	0	0	0	0	0	15136.2	0	1.12649e+07	2.1743e+07	0	0	0	0	0	0	0	0	0	0	15321.9	3.14581e+06	15743.8	71122.1	0	0	0	0	0	0	0	3.04243e+06	4.34736e+07	6.66824e+07	7.14999e+07	3.14816e+07	0
929	0	0	0	0	0	1.87912e+06	3.75614e+07	3.21468e+07	3.61012e+06	0	0	0	0	0	0	0	0	0	0	0	0	664005	75218.2	0	0	0	0	0	0	626627	3.91326e+07	2.85264e+07	1.03346e+08	9.26896e+07	1218.11	0
930	0	0	0	0	0	767860	7.30524e+06	6.57888e+07	5.43834e+07	1.60935e+07	1.431e+07	2.71578e+06	0	0	0	0	0	0	0	0	0	0	0	0	0	0	0	0	0	15137.7	3.03836e+06	5.39445e+07	4.16922e+07	4.12704e+07	1.53841e+07	11279.5
931	0	0	0	0	0	0	0	0	0	0	0	0	0	0	0	0	0	0	3497.81	6.79624e+06	3.46945e+07	4.85197e+07	0	0	0	0	0	0	0	0	0	0	5.58572e+06	2.14525e+07	0	0
932	0	0	0	0	0	1.87835e+06	2.4978e+06	2.40592e+07	3.97468e+07	5.71082e+06	0	0	0	0	0	0	0	0	2.47173e+06	6.49635e+07	5.75604e+07	3.51647e+07	0	0	0	0	0	0	0	16271.7	9.95318e+06	1.12568e+07	0	0	0	0
933	0	0	0	0	0	0	15892	0	0	0	0	0	0	0	0	0	0	0	0	0	0	0	7380.64	9.64767e+06	0	0	0	0	0	0	38456	3.43096e+07	6.49964e+07	8.81838e+07	3.55618e+07	4.10772e+06
934	0	0	0	0	0	0	0	0	0	0	0	0	0	0	0	0	0	0	0	0	0	0	0	0	0	0	0	0	0	0	2.43044e+06	1.35099e+07	24969.3	1.31684e+06	9481.62	0
935	0	0	0	0	0	0	0	646982	7.47341e+06	0	0	0	0	0	0	0	0	0	9.65367e+06	1.91389e+07	5.88394e+07	4.31899e+07	752351	2.65966e+06	0	0	0	0	0	0	10491.9	7.43573e+06	7.43399e+07	8.83858e+07	1.52759e+07	3.64769e+06
936	0	0	0	0	0	0	0	0	3.09967e+06	0	0	0	0	0	0	0	0	2.4348e+06	0	0	0	3.34309e+06	0	0	0	0	0	0	0	628743	1.74623e+07	6.17318e+07	1.43587e+07	5.49295e+07	3690.32	62435.4
937	0	0	0	0	0	0	3.04881e+06	8.87039e+06	2.5425e+07	1.44851e+07	4.02312e+06	2.65855e+06	0	0	0	0	0	0	0	0	0	0	0	0	0	0	0	0	2.47119e+06	789713	2.63809e+07	1.16509e+08	8.14332e+07	6.2856e+07	2.57162e+06	0
938	0	0	0	0	0	0	0	0	0	0	0	0	0	0	0	0	0	0	6976.72	1.29169e+07	3.9129e+07	6.45482e+07	727309	0	0	0	0	0	145944	771719	7.39676e+06	1.93452e+07	0	9.02227e+06	1.68978e+07	7631.9
939	0	0	0	0	0	0	1.08977e+07	6.58325e+07	3.88447e+07	3.54901e+07	0	0	0	0	0	0	0	0	0	0	0	0	0	0	0	0	0	0	0	0	7.41161e+06	3.51597e+07	6.16331e+07	7.32549e+07	670986	0
940	0	0	0	0	0	0	0	0	22405.1	0	0	0	0	0	0	0	0	0	1.40815e+07	0	0	0	0	0	0	0	0	0	0	0	0	0	0	0	7334.74	1264.07
941	0	0	0	0	0	0	0	0	0	0	0	0	0	0	0	0	0	0	626705	637694	3.73972e+06	53195.3	0	0	0	0	0	0	0	0	4.8256e+06	3.02702e+07	3.60606e+07	7.42586e+07	4.78688e+07	1.76827e+07
942	0	0	0	0	0	0	641851	0	653052	0	0	0	0	0	0	0	0	0	0	0	637406	2.53972e+06	0	0	0	0	0	0	0	0	0	2.46079e+06	8.61936e+06	6.35326e+06	0	0
943	0	0	0	0	0	0	0	0	0	0	0	0	0	0	0	0	0	0	0	7.94865e+06	6.4166e+07	845828	0	0	0	0	0	0	663012	1.33988e+07	2.44547e+07	6.25413e+07	5.67572e+07	9.29971e+07	2.02776e+07	1.74264e+07
944	0	0	0	0	0	0	6945.19	3.37581e+06	2.5701e+06	0	1100.83	0	0	0	0	0	0	0	1.27806e+07	2.60323e+07	0	0	0	0	0	0	0	0	0	0	17489.5	3.56093e+07	3.29379e+07	6.36127e+07	2.44538e+07	11283.8
945	0	0	0	0	0	0	0	4.51807e+06	3.77208e+07	2.54689e+06	0	0	0	0	0	0	0	0	0	1.0527e+07	6.7537e+07	5.87872e+07	2.62412e+06	1264.74	0	0	0	0	0	0	0	0	0	0	0	0
946	0	0	0	0	0	627842	1.42383e+07	6.57992e+07	3.80647e+07	661606	1218.41	16556.5	0	0	0	0	0	0	0	0	0	0	0	0	0	0	0	0	0	0	2.43638e+06	0	0	0	0	0
947	0	0	0	0	0	0	0	2.04221e+07	7.59299e+07	4.98878e+07	3.49864e+06	0	0	0	0	0	0	0	0	1.04465e+07	4.95386e+07	1.53281e+07	1.06773e+07	2.65207e+06	0	0	0	0	0	0	7.29419e+06	1.62136e+07	4.3686e+06	5.05564e+06	0	0
948	0	0	0	0	0	637626	0	0	0	0	0	0	0	0	0	0	0	0	646654	1.28254e+07	0	0	0	0	0	0	0	0	0	0	0	0	4.93589e+06	1.56435e+07	7299.12	0
949	0	0	0	0	0	0	4.84092e+06	0	2.3584e+07	0	0	0	0	0	0	0	0	0	0	0	0	2.78879e+07	0	0	0	0	0	0	0	1.00011e+07	7.90255e+06	8.4246e+07	9.62745e+07	5.72209e+07	2.53133e+07	1.30758e+07
950	0	0	0	0	0	7.28746e+06	1.84771e+07	0	0	0	0	0	0	0	0	0	0	0	0	0	0	0	0	0	0	0	0	0	0	0	1.03937e+07	4.83817e+07	5.49146e+07	5.92118e+07	6.68154e+06	3.01763e+07
951	0	0	0	0	0	0	0	0	0	0	0	0	0	0	0	0	0	0	5.4618e+06	5.91842e+07	3.37469e+07	2.72738e+07	0	0	0	0	0	0	0	1155.05	3.20282e+06	5.55558e+06	2.07388e+07	5.76731e+07	5.95113e+06	0
952	0	0	0	0	0	0	1.24953e+06	2.45015e+07	8.01816e+07	5.05842e+07	1.1763e+07	2.65273e+06	0	0	0	0	146000	1.66809e+07	6.0127e+07	2.56595e+07	3.59099e+07	18254.6	1.43051e+06	0	0	0	0	0	0	0	0	0	0	5.08415e+06	0	0
953	0	0	0	0	0	0	5.45483e+06	1.76828e+07	1.39562e+07	32680.1	0	0	0	0	0	0	0	0	1.25382e+06	1167.54	0	1.10681e+07	4.07824e+06	7592.37	0	0	0	0	0	2308.25	4.86682e+06	1.94096e+07	5.90036e+07	6.30802e+06	15961	0
954	0	0	0	0	145927	638945	6.89933e+07	8.67644e+07	1.03325e+08	6.44584e+07	1.73661e+07	7557.16	0	0	0	0	8.87634e+06	3.68793e+06	3.34588e+07	5.50969e+07	6.20419e+07	3.19534e+07	3688.28	0	0	0	0	0	0	0	0	0	2.46706e+06	7279.86	0	0
955	0	0	0	0	0	0	2.4487e+07	6.18928e+07	7.75395e+07	2.99271e+07	702901	3819.07	0	0	0	0	0	0	0	2.17429e+07	6.86919e+07	6.17363e+07	7.31108e+06	3790.05	0	0	0	0	0	0	1.02857e+07	1.5467e+07	8.1798e+06	0	0	0
956	0	0	0	0	0	0	0	6.87121e+06	8.09395e+07	3.47246e+07	6.58407e+06	3819.58	0	0	0	0	0	0	0	1.79231e+07	5.55288e+07	4.47916e+07	1.5911e+07	0	0	0	0	0	0	768123	1.96416e+07	4.23396e+07	4.30691e+07	5.87858e+07	1.04383e+07	0
957	0	0	0	0	0	0	0	0	0	0	2.5606e+06	0	0	0	0	0	0	0	6.06518e+06	1.16673e+07	2.09182e+07	7.61037e+06	0	0	0	0	0	0	0	15120.9	1.35982e+07	5.99228e+07	5.30454e+07	5.48684e+07	2.56806e+06	0
958	0	0	0	0	0	628704	1.17134e+07	3.54723e+07	8.29426e+07	3.73262e+07	1.38012e+07	0	0	0	0	0	638150	4.95164e+06	3.04964e+07	2.45404e+06	668455	7283.59	0	0	0	0	0	0	0	0	3502.62	1.149e+07	1.01441e+07	3.13655e+07	1.85699e+07	15090.5
959	2.26144e+06	0	827814	10723.3	638444	0	16228.9	708259	5.4004e+07	2.76959e+07	19580.1	0	0	0	0	0	0	0	2.42543e+06	6.02688e+07	2.83564e+07	2.25674e+07	2.42262e+07	4.24195e+06	0	0	0	0	9099.3	1.78302e+06	1.88746e+07	4.45824e+07	0	0	0	0
960	0	0	0	0	0	0	8.43604e+06	2.14841e+07	1.31472e+06	1.3817e+06	0	0	0	0	0	0	9117.21	638180	1.95604e+07	6.86548e+07	7.29247e+07	2.31096e+07	5.12019e+06	0	0	0	0	0	0	0	0	0	0	0	0	0
961	0	0	0	0	0	1.17945e+07	0	6.32657e+06	4.2441e+07	1.91658e+07	17008.9	0	0	0	0	0	0	0	6.21439e+06	1.90505e+06	1.40413e+07	1.31056e+06	0	3819.78	0	0	0	0	0	2.42959e+06	1.96557e+07	7.57419e+07	7.94472e+07	8.79161e+07	3.9091e+07	2.62533e+07
962	0	0	0	0	0	0	0	0	0	0	0	0	0	0	0	0	643551	2.5223e+07	2.57903e+07	6.33572e+07	8.77633e+07	3.05769e+07	9467	0	0	0	0	0	0	0	8.67748e+06	2.50042e+07	1.09937e+08	7.2072e+07	3.16046e+06	687007
963	0	0	0	0	0	0	1.17264e+07	0	0	0	0	0	0	0	0	0	0	0	0	636661	4.44038e+07	4.77547e+07	3.98709e+06	0	0	0	0	0	0	0	13990.9	1.35774e+07	4.82245e+07	1.77075e+07	0	0
964	0	0	0	0	0	0	0	0	0	0	0	0	0	0	0	0	0	0	0	4.98293e+07	7.39354e+07	5.97172e+07	3.91438e+06	0	0	0	0	0	0	0	1.03052e+07	1.1654e+07	449850	0	729751	764020
965	0	0	0	0	0	0	8.68378e+06	2333.93	0	0	0	0	0	0	0	0	0	0	0	7.93099e+06	7.64397e+07	6.40341e+07	4.70231e+06	0	0	0	0	0	0	8967.38	2.44766e+06	1.37649e+07	3.30006e+07	5.36981e+07	1.37699e+07	2.84331e+06
966	0	0	0	0	0	0	0	0	8.65965e+06	3.39017e+07	5.68816e+06	7.51612e+06	0	0	0	0	0	0	0	0	1.99022e+07	4.36677e+07	3.71833e+07	7.16448e+06	0	0	0	0	0	0	1.33446e+07	3.25296e+07	4.83922e+07	0	0	0
967	0	0	0	0	0	0	1.31815e+07	2.993e+07	4.95274e+07	7.25377e+07	1.63541e+07	1.50987e+06	0	0	0	0	0	0	2.26017e+07	4.57344e+07	7.57729e+07	4.51225e+07	1.06362e+07	2.65752e+06	0	0	0	0	0	0	0	0	7064.48	2.54164e+06	3688.58	0
968	0	0	0	0	0	0	0	0	0	0	0	0	0	0	0	0	0	0	0	0	0	0	0	0	0	0	0	0	0	143201	2.45884e+06	5.45072e+07	7.2306e+07	6.55935e+07	9.5857e+06	2.6536e+06
969	0	0	0	0	0	0	0	1.01229e+07	4.1934e+07	4.08218e+07	1.03325e+07	3.08783e+06	0	0	0	0	0	0	0	0	0	0	0	0	0	0	0	0	0	626605	1.48304e+07	1.98069e+07	4.26772e+07	7.17157e+07	1.30338e+07	714862
970	0	0	0	0	0	0	0	1.79039e+07	6.69669e+07	5.66485e+06	0	0	0	0	0	0	0	15119.5	0	0	0	0	0	0	0	0	0	0	0	0	0	1.27307e+06	0	0	0	0
971	0	0	0	0	0	0	0	0	0	0	0	0	0	0	0	0	0	658963	2.21725e+07	4.38041e+06	4.54137e+07	1.42378e+07	0	1134.15	0	0	0	0	0	0	24482.6	2.69513e+07	3.51995e+07	0	0	0
972	0	0	0	0	0	0	0	0	0	0	0	0	0	0	0	0	1173.19	6.9778e+06	5.70699e+07	8.17604e+07	6.303e+07	4.11209e+07	9.14004e+06	11283.8	0	0	0	0	0	2.44356e+06	4.28154e+07	2.20887e+07	5.41415e+07	8.67843e+07	1.76887e+07	3.34191e+06
973	0	0	0	0	0	3.18983e+06	3.67059e+06	0	3563.21	60126.3	701887	0	0	0	0	0	0	0	3.05014e+06	5.52253e+06	9.50125e+06	0	0	0	0	0	0	0	0	0	2.42771e+06	6.25606e+07	5.22903e+07	7.28741e+07	3.33074e+06	0
974	0	0	0	0	0	0	3.06761e+06	2.5489e+06	6.12276e+06	2.92996e+07	0	0	0	0	0	0	0	0	625863	7.48554e+07	5.57943e+07	4.91979e+07	229277	7592.16	0	0	0	0	0	634214	1.21443e+07	1.83434e+07	1.7412e+07	0	0	0
975	0	0	0	0	0	628014	2.42074e+06	0	0	0	0	0	0	0	0	0	0	0	0	0	3.32889e+07	0	0	0	0	0	0	0	0	0	0	4.90447e+06	7.54868e+07	8.51176e+07	5.45803e+07	1.72351e+07
976	0	0	0	0	0	0	0	2.72496e+06	4.59755e+07	8.39264e+06	2.09734e+06	0	0	0	0	0	0	0	1.23026e+07	2.6242e+07	4.82101e+07	23121.7	12165.8	0	8473.88	0	0	0	0	0	5.47194e+06	1.17747e+07	7.1588e+07	0	1216.71	0
977	0	0	0	0	0	0	0	8.82062e+06	2.26084e+07	3.83713e+07	662235	0	0	0	0	0	0	2.42354e+06	0	1.13513e+07	0	0	0	0	0	0	0	0	0	0	626059	8.03205e+06	5.17265e+07	1.91673e+07	0	0
978	7351.1	0	0	0	0	0	8.68094e+06	781582	0	0	0	0	0	0	0	0	0	0	0	0	0	0	0	0	0	0	0	0	0	152806	1.55899e+07	8.04224e+07	5.53052e+07	670035	0	0
979	0	0	0	0	0	0	0	2.33294e+07	4.89133e+07	2.12692e+06	3690.63	0	0	0	0	0	0	0	0	0	3.09806e+06	2.56178e+07	1.72903e+07	5.51361e+06	0	0	0	0	0	0	0	2.14478e+07	1.46925e+07	4.06056e+07	1.08457e+07	0
980	0	0	0	0	0	0	0	15286.9	2.71069e+07	2.03332e+07	0	0	0	0	0	0	0	0	2.45076e+06	2.3447e+07	4.13867e+07	3.55027e+07	1.64647e+07	2.74244e+06	10992	0	0	0	0	31428.7	1.34378e+07	2.5621e+07	5.32915e+07	9.21899e+07	4.409e+07	3.56286e+07
981	0	0	0	0	0	0	0	0	2.47079e+06	7280.48	0	0	0	0	0	0	0	628077	2.30779e+07	3.53326e+07	7.93317e+07	6.35648e+07	3.42183e+07	4.48003e+06	0	0	0	0	0	0	2.4576e+06	1.53475e+07	6.25334e+07	6.30473e+07	2.87079e+07	838265
982	0	0	0	0	0	0	0	0	0	0	0	0	0	0	0	0	0	0	18587.9	1.00745e+07	7.10131e+07	8.24432e+07	1.22774e+07	0	0	0	0	0	0	0	650000	5.07704e+06	6.15857e+07	7.07046e+07	701681	0
983	0	0	0	0	0	0	0	0	0	0	0	0	0	0	0	0	653993	24076.9	5.47542e+06	4.53942e+07	6.78027e+07	1.55484e+07	662647	0	0	0	0	0	0	11264.4	1.46105e+07	4.26575e+07	8.06311e+07	8.71513e+07	6057.49	0
984	0	0	0	0	0	0	1.88653e+06	2.48682e+07	0	0	0	0	0	0	0	0	0	0	1.87026e+06	5.56387e+06	3.05015e+07	3.50952e+07	67595.1	0	0	0	0	7137.38	1173.37	0	1.64964e+07	8.0145e+06	2.75951e+07	6.29429e+07	1.17899e+07	7587.4
985	0	0	0	0	0	15139.1	1.32688e+07	5.88361e+07	5.50881e+07	1.16617e+07	0	0	0	0	0	0	0	0	1.9893e+07	3.17079e+07	6.78894e+07	5.45141e+07	6.20393e+06	0	0	0	0	0	0	0	2.42675e+06	1.04835e+07	2.25935e+07	7.04639e+07	0	3.33859e+06
986	0	0	0	0	0	0	6956.79	45871.5	2.83632e+07	4.08953e+07	2.5238e+07	0	0	0	0	2.50932e+06	1.29866e+06	1.29863e+07	0	0	0	0	0	0	0	0	0	0	0	0	0	28046.7	2.24446e+07	8.56326e+07	9.04808e+06	1.4331e+06
987	0	0	0	0	0	0	0	0	0	722675	672041	0	0	0	0	0	0	0	0	0	0	0	0	0	0	0	0	0	0	0	0	0	2.24605e+07	7.23251e+07	2.55921e+06	0
988	0	0	0	0	0	0	0	0	0	0	0	0	741482	790066	0	3593.25	0	0	2.42961e+07	1.98756e+07	2.46765e+06	0	0	0	0	0	0	0	0	0	1.70888e+07	2.26144e+07	4.06225e+07	4.19609e+07	0	0
989	0	0	0	0	0	0	3.04028e+06	0	8.25895e+06	0	0	0	0	0	0	0	0	0	632064	1.0916e+07	6.39566e+07	2.69744e+07	1.29747e+07	0	0	0	0	0	0	0	637120	4.15716e+07	5.07029e+07	7.61693e+07	1.04674e+07	707914
990	0	0	0	0	0	0	2.43265e+06	636987	2.46131e+06	5.88472e+06	3.22596e+07	5.19955e+06	0	0	0	0	0	0	0	6.84181e+06	3.53388e+07	3655.89	0	0	0	0	0	0	0	0	3.06054e+06	1.36699e+07	6.93346e+07	4.11555e+07	0	0
991	0	0	0	0	0	0	0	0	0	0	0	0	0	0	0	0	0	0	0	3.07712e+06	4.6082e+07	3.61541e+07	662435	0	0	0	0	0	0	1155.05	2.35009e+07	3.0895e+07	3.40557e+07	7.65153e+07	8.55029e+06	3.32132e+06
992	0	0	0	0	0	0	2.42546e+06	15253.4	0	0	0	0	0	0	0	0	0	0	3.06975e+06	2.87377e+07	9.67881e+07	5.06653e+07	9.03055e+06	3817.64	0	0	0	0	0	1.41993e+07	8.50923e+07	8.21425e+07	4.87242e+07	5.50065e+07	8.24642e+06	686987
993	0	0	0	0	0	0	0	0	0	0	0	0	0	0	0	0	0	0	0	1.89524e+07	4.45107e+07	4.18018e+07	3.9827e+06	2.64816e+06	0	0	0	3595.09	2.4681e+06	1.2537e+07	3.82955e+07	5.45778e+07	6.10595e+07	6.03076e+07	2.03522e+07	0
994	0	0	0	0	0	297485	4.60047e+07	9.2621e+07	8.66845e+07	5.54702e+07	1.70206e+07	0	0	0	0	0	1173.82	4.97444e+06	6.96701e+07	1.02709e+08	6.48865e+07	4.34391e+07	4.30663e+07	4.19718e+06	0	0	0	0	0	0	1.11127e+07	66689.9	4.05482e+07	8.44128e+07	1.85797e+07	0
995	0	0	0	0	0	0	0	0	0	7.71818e+06	60409	0	0	0	0	0	0	0	1.82192e+07	693477	1.29454e+07	23126.8	0	0	0	0	0	0	0	1150.62	2.9956e+07	2.41444e+07	3.43261e+07	4.12363e+07	27770.8	739284
996	0	0	0	0	0	0	0	0	637993	0	0	0	0	0	0	0	0	0	0	1.68393e+07	3.97545e+07	3.62542e+07	15858.1	0	0	0	0	0	0	0	2.43455e+06	7.92453e+06	3.8776e+07	2.69037e+07	7.8537e+06	0
997	0	0	0	0	0	0	0	0	637210	2.53271e+07	1.24909e+07	0	0	0	0	0	0	0	0	0	0	0	0	0	0	0	0	0	0	0	8.6845e+06	5.54289e+06	6.65704e+07	6.77639e+07	83568.9	0
998	0	0	0	0	0	0	9.30387e+06	2.37745e+07	3.55741e+07	7.05496e+06	6.07289e+06	1.11743e+07	0	0	0	0	0	0	3.05376e+06	3.19155e+06	7.83013e+07	6.37778e+06	0	0	0	0	0	0	0	0	4.9915e+06	1.74904e+07	3.36168e+07	822445	0	0
999	0	0	0	0	0	1.302e+07	4.18145e+07	7.83103e+07	8.19599e+07	2.03468e+07	12048.9	0	0	0	0	0	0	0	3.04898e+06	5.01205e+06	4.8678e+07	6.23682e+07	763422	7590.92	0	0	0	0	0	0	0	0	7.91377e+06	3.10649e+07	144789	0
1000	0	0	0	0	0	0	2.51364e+06	3.44538e+07	8.57898e+07	5.21492e+07	9.09703e+06	3.67674e+06	0	0	0	0	648932	0	0	5.0476e+06	5.7138e+07	2413.91	0	0	0	0	0	0	0	0	2.20667e+07	4.01859e+07	2.52213e+07	2.6584e+07	0	0
1001	0	0	0	0	0	0	0	1.28819e+06	3.08194e+07	2.75138e+07	4.69167e+06	0	0	0	0	0	0	153320	9.77698e+06	8.3386e+07	3.81428e+07	6.53128e+07	7.62441e+06	0	0	0	0	0	0	627548	1.10885e+07	2.91414e+07	4.13638e+07	3.86113e+06	0	0
1002	0	0	0	0	0	0	0	31825.3	2.42132e+07	4.29028e+07	0	0	0	0	0	0	0	0	25521.5	9.27092e+06	5.27654e+07	6.27322e+07	17078.3	0	732109	0	0	0	0	0	2.4099e+06	4.96516e+06	5.70068e+07	2.5477e+06	0	0
1003	60758.1	0	0	0	0	0	0	0	0	0	0	0	0	0	0	0	0	0	29051.1	1.11393e+07	5.80547e+07	5.27434e+07	3.50941e+06	0	0	0	0	0	0	0	3504.97	1.13012e+07	1.11679e+07	2.57944e+07	0	0
1004	0	0	0	0	0	0	0	0	4.92004e+06	3.5363e+07	1.21582e+07	1.47003e+06	47576.6	0	0	0	0	143228	8.71801e+06	4.85599e+07	6.46847e+07	8.44931e+07	1.28135e+07	7.97067e+06	0	0	0	0	1173	1.26991e+06	9.71726e+06	1.11906e+07	7.76912e+07	1.05046e+08	2.52649e+07	0
1005	0	0	0	0	0	0	0	0	0	1.23944e+07	0	0	0	0	0	0	0	0	1.20947e+07	7.33694e+07	6.5641e+07	6.4929e+07	2.02108e+07	84367.2	0	0	0	0	0	1.21487e+07	1.52658e+07	3.96878e+07	2.29117e+07	679931	0	0
1006	0	0	0	0	0	143234	3.33177e+07	5.93385e+07	8.70251e+07	5.17254e+07	1.17687e+07	0	10992.3	0	0	0	0	0	3501.9	2.8114e+07	6.51693e+07	4.6615e+07	5.53379e+06	753427	0	0	0	0	0	0	3497.81	3.86808e+07	3.14292e+07	4.34317e+07	0	0
1007	0	0	0	0	0	0	2.43493e+06	2.47448e+07	4.4627e+07	5.50098e+07	6.89165e+06	2.62902e+07	0	0	0	0	0	0	1.92048e+07	3.06006e+07	7.33744e+07	6.83825e+07	672332	0	126570	0	0	0	0	0	7.2849e+06	9.94432e+06	4.7973e+07	9.68176e+07	1.64664e+07	2.71102e+06
1008	0	0	0	0	2.45423e+06	0	1.24944e+06	3.7629e+07	7.19236e+07	5.92382e+07	2.50654e+07	0	0	0	0	0	0	1155.05	17463.2	8.72296e+06	5.09663e+07	6.28226e+07	1.91217e+07	6.5707e+06	0	0	0	0	0	9.47062e+06	3.34296e+07	1.60287e+07	2.38013e+07	4.88591e+07	0	0
1009	0	0	0	0	0	0	0	0	1171.64	0	0	0	0	0	0	0	0	2309.62	1.59607e+07	7.46878e+07	7.24256e+07	2.83499e+07	0	0	0	0	0	0	0	8.71374e+06	7.87103e+06	4.46673e+07	3.64518e+07	8.20098e+07	7.64498e+06	0
1010	0	0	0	0	0	628979	1151.02	2.60559e+07	6.96644e+07	7.84581e+07	1.28735e+07	3.50092e+06	0	0	0	0	0	0	3.15629e+07	4.12662e+07	8.48583e+07	8.58865e+07	1.98816e+07	762812	4.4028e+06	3679.39	0	0	0	1155.05	0	1.31858e+07	644503	0	0	0
1011	0	0	0	0	0	0	2.08695e+07	5.35399e+07	2.4983e+07	5.37647e+07	702046	0	47568.9	0	0	0	0	0	0	0	0	0	0	0	0	0	0	0	0	0	3497.2	3.18115e+06	2.98608e+07	5.16716e+07	1.02813e+07	21514.3
1012	0	0	0	0	0	0	0	1.49759e+07	1.08911e+07	3.11326e+06	0	0	0	0	0	0	0	1.39697e+06	3.49815e+07	9.0067e+07	5.87251e+07	5.58638e+07	21936.2	18877.1	12098.6	722963	0	0	0	0	2.42235e+06	4.25358e+07	6.22793e+07	5.53515e+07	1.2499e+07	3819.17
1013	0	0	0	0	0	0	7.35007e+06	6.4685e+07	8.97031e+07	1.31054e+07	4778.5	0	0	0	0	0	0	0	0	9.46054e+06	2.04451e+07	0	0	0	0	0	0	0	0	8967.68	0	3.09298e+06	2.86938e+07	6.92155e+07	5.11291e+06	0
1014	0	0	0	0	0	0	0	0	0	0	0	0	0	0	0	0	0	0	2.79753e+07	4.75792e+07	4.82795e+07	2.8609e+07	5.11019e+06	71114	0	0	0	0	0	0	0	15310.4	0	0	0	0
1015	0	0	0	0	0	2.42359e+06	1.52828e+07	5.76488e+07	4.24796e+07	3.04869e+07	7.33679e+06	0	0	0	0	0	0	0	1.4728e+07	2.67966e+07	5.22664e+07	2.83918e+07	4.24237e+06	0	0	0	0	0	0	0	0	0	6.78002e+06	1.49664e+07	0	0
1016	0	0	0	0	0	0	0	2.46389e+06	0	0	0	0	0	0	0	0	0	0	6.11319e+06	1.31103e+07	4.00148e+07	4.58084e+07	5.76824e+06	0	0	0	0	0	0	624236	1.03378e+07	7.05466e+07	6.53378e+07	8.62951e+07	4.70171e+06	0
1017	0	0	0	0	0	0	0	0	1.1694e+07	2.82027e+07	1.45292e+07	0	0	0	0	0	0	3.05772e+06	2.85231e+07	6.78506e+07	3.60462e+07	4.76788e+06	731759	0	3.22419e+06	730322	0	0	0	0	0	2.23546e+07	7.43646e+07	5.03421e+07	6.5034e+06	0
1018	0	0	0	0	0	0	32542.2	1.88554e+07	7.61302e+07	7.35486e+07	0	0	0	0	0	0	0	0	0	2.23329e+07	4.17832e+07	1.95364e+07	4.0052e+06	2.19364e+06	0	0	0	0	0	15133.9	7.85957e+06	1.88014e+07	5.20641e+07	5.88254e+07	2.60406e+06	754374
1019	0	0	0	0	0	0	5.45557e+06	5.00595e+06	3.27385e+07	2.1782e+07	4.07129e+06	0	0	0	0	3588.24	0	2305.52	2.56783e+06	8.59151e+07	7.2222e+07	3.70651e+07	0	0	0	0	0	0	0	1154.75	4.34157e+06	2.52381e+07	6.95415e+07	8.69695e+07	2.17121e+07	687026
1020	976096	1.45563e+06	0	0	1173.12	630152	4.32533e+06	7.49084e+06	5.98405e+07	3.87481e+07	16796	0	0	0	0	0	0	628998	0	8.83954e+06	6.78086e+06	3.22014e+07	26726.2	0	0	0	0	0	0	158352	5.58541e+06	6.24443e+07	8.98831e+07	5.11769e+07	0	0
1021	0	0	0	0	0	22116.5	626960	2.64677e+07	3.96444e+07	25062.2	0	0	0	0	0	0	0	0	0	0	0	7282.35	60518	0	3705.24	0	0	0	1.27326e+06	1.93289e+07	8.33072e+07	3.42741e+07	8.49165e+07	9.05909e+07	6.26231e+07	3.94375e+07
1022	0	0	0	0	0	0	0	0	0	0	0	0	0	0	0	0	9111.54	7.49442e+06	4.57513e+07	6.32207e+07	4.29057e+07	5.15639e+06	677184	0	0	0	0	0	0	770783	4.86495e+06	2.31289e+07	5.15623e+07	1.86372e+07	0	0
1023	0	0	0	0	161427	1.90459e+06	1151.24	2.51394e+06	1.84842e+07	2.56532e+06	1.45403e+06	49906	0	0	0	0	0	0	3.68126e+06	5.24836e+07	5.64908e+07	4.72868e+07	1.13876e+07	0	0	0	0	0	0	0	0	0	6.16997e+06	0	0	0
1024	0	0	0	0	0	0	0	0	647797	9408.5	0	0	0	0	0	0	0	0	1.26615e+06	3554.11	7.43259e+06	6.40386e+06	196804	0	0	0	0	0	0	0	0	21161.8	3.12173e+07	4.02129e+07	5.29987e+07	1.80807e+07
1025	0	0	0	0	0	0	0	7055.37	3.04289e+07	7.88535e+07	2.75963e+07	1.7096e+06	0	0	0	0	0	0	0	0	1171.08	2.03579e+07	1.23358e+07	0	0	0	0	0	0	0	0	7066.44	2.72603e+07	5.16371e+07	2.5896e+06	0
1026	0	0	0	0	0	8.70291e+06	2.42524e+06	0	3.10525e+06	1.9889e+06	0	0	0	0	0	0	0	0	657483	3.01891e+07	8.09464e+07	8.5361e+07	3.0631e+07	1.18218e+07	60769.1	0	0	0	0	0	0	4.67229e+07	4.59465e+07	7.50041e+07	2.28805e+07	2.71022e+06
1027	0	0	0	0	0	0	0	649666	8.73732e+06	1.96936e+06	0	0	0	0	0	0	0	5.34073e+07	6.06715e+07	8.63183e+07	5.41871e+07	5.40939e+07	698413	1132.77	0	0	0	0	0	0	0	2.50274e+06	1.8947e+07	6.96384e+07	1.48693e+06	17765.4
1028	0	0	0	0	0	0	0	1.18186e+07	1.90975e+07	60123.2	0	0	0	0	0	0	9116.91	642662	0	5.47647e+07	5.35416e+07	2.88832e+07	6.43891e+06	0	0	0	0	0	0	143201	2.45576e+06	8.02659e+06	1.38532e+07	0	0	0
1029	0	0	0	0	0	0	0	5.18753e+07	2.40616e+07	0	10947.7	0	0	0	0	0	0	0	6.71937e+06	4.52025e+07	6.55097e+07	3.16227e+07	1.27382e+07	4.1356e+06	0	0	0	0	0	0	1.59296e+07	2.98569e+07	3.86665e+07	4.67089e+07	0	0
1030	0	0	0	0	0	0	0	4.39527e+06	1.74326e+07	1.00901e+07	871289	12544.9	0	0	0	0	0	0	625843	2.34796e+07	3.6518e+07	3.44376e+07	2.3209e+07	694151	0	0	0	0	0	629816	6.27965e+07	3.20631e+07	7.9239e+07	4.12513e+07	4.56762e+07	693819
1031	0	0	0	0	0	0	4.29673e+06	3.86477e+06	5.99012e+07	3.11885e+07	2.94107e+07	727510	0	0	0	0	0	0	13998.7	1.4093e+07	6.00252e+07	4.87466e+07	2.57566e+06	0	0	0	0	0	0	2.11057e+07	2.00288e+07	6.62631e+07	3.69825e+07	9.86071e+06	0	0
1032	0	0	0	0	0	1.25641e+06	1.24954e+06	4.87226e+06	2.50071e+07	9408.5	722873	0	0	0	0	0	0	0	1.11127e+07	4.38746e+06	0	2.54974e+06	0	0	0	0	0	0	0	15120	4.94031e+06	3.11012e+07	4.92232e+07	8.11057e+07	5.45777e+07	3.22232e+07
1033	0	0	0	0	0	0	0	0	0	0	0	0	0	0	0	0	0	0	0	0	0	7279.65	3690.73	0	71623.8	0	0	0	9113.92	5.64787e+06	2.6813e+07	8.01597e+07	7.1867e+07	8.58245e+07	6.56027e+06	0
1034	0	0	0	0	0	0	0	0	0	0	0	0	0	0	0	0	0	1.26037e+06	6.19218e+07	1.11269e+08	7.75068e+07	7.02203e+07	4.9772e+06	3813.34	0	0	0	0	0	0	45283	4.00413e+07	6.40749e+07	4.88945e+07	4.2478e+06	0
1035	0	0	0	0	0	15133.4	1.85777e+07	7.58004e+07	5.83859e+07	5.01645e+07	0	0	0	730432	0	0	0	632503	3.29265e+07	3.719e+07	2.51518e+07	0	0	0	0	0	0	0	0	8.1406e+06	7.63202e+07	2.31435e+07	1.02006e+07	5.41237e+07	3691.55	0
1036	0	0	0	0	0	0	0	1.91568e+06	3.08524e+06	1.4131e+07	1.49388e+06	724135	0	0	0	0	0	0	0	0	2.46662e+06	667732	7287.73	3819.27	0	0	0	0	1.28274e+06	9.97988e+06	1.03147e+07	2.71871e+07	5.59777e+07	3.65024e+07	764145	753446
1037	0	1.69521e+06	0	0	0	0	0	0	2.81151e+07	2.04766e+07	1.49668e+07	3.41193e+06	0	0	0	0	0	769919	3.25096e+07	7.84319e+07	2.05859e+07	1.48373e+07	0	0	0	0	0	0	0	0	31237.8	8.69998e+06	3.70207e+07	7.74512e+07	2.06891e+07	0
1038	0	0	0	0	0	630454	2.4986e+07	7.89241e+07	4.04858e+07	23061	0	0	0	0	0	0	0	0	3.21068e+07	4.34234e+06	1.20485e+07	1208.92	0	0	0	0	0	0	0	0	2.13391e+07	4.03188e+07	0	6.48787e+06	10967.5	0
1039	0	0	0	0	669251	2.48228e+07	3.14072e+07	7.15982e+07	5.92508e+07	9.59678e+06	0	0	0	0	0	0	0	624411	1.3356e+07	4.92523e+07	8.31026e+07	3.80053e+07	2.74223e+06	3.37611e+06	0	10946.9	0	0	0	0	0	7.96861e+06	8.16345e+07	1.046e+08	1.74692e+07	2394.44
1040	0	0	0	0	0	0	0	0	0	0	0	0	0	0	0	0	0	643516	1.69345e+07	8.6131e+07	4.04652e+07	3.53279e+07	2.57051e+06	0	0	0	0	0	0	0	645486	3.03005e+07	5.7628e+07	6.46854e+07	3.55577e+06	1.0354e+07
1041	0	0	0	0	0	0	0	0	0	0	0	0	0	0	0	0	0	0	2.42836e+06	1.18979e+07	5.65842e+07	4.73756e+07	2.56082e+06	0	675471	0	0	0	0	0	7.28411e+06	2.19784e+07	4.45306e+07	2.14155e+07	2.50708e+06	0
1042	0	0	0	0	0	4.32758e+06	1.85719e+07	6.67835e+07	6.1104e+07	5.62576e+07	1.43368e+07	66231.6	0	0	0	0	0	0	0	1.92652e+06	2.49543e+07	0	0	0	0	0	0	0	0	0	5.45768e+06	2.85365e+07	7.28343e+07	4.04635e+07	0	0
1043	0	0	0	0	0	1.04445e+07	5.29724e+07	4.73299e+07	8.68506e+07	4.27064e+07	2.69036e+07	1.72808e+07	0	0	0	0	0	0	2.4259e+06	8219.59	0	7284	0	0	0	60458	0	0	0	0	6.69452e+06	1.34725e+07	3.4093e+07	7.48806e+07	1.15828e+07	1264.55
1044	0	0	0	0	0	0	626901	3.75492e+06	0	0	0	0	0	0	0	0	0	0	1.28389e+06	9.24392e+07	6.07414e+07	5.62502e+07	0	0	0	0	0	0	0	0	0	651556	2.63306e+07	3.18934e+06	0	0
1045	0	0	0	0	0	0	0	1.29534e+06	2.23763e+07	9.15498e+06	661373	0	0	0	0	0	0	0	0	8.00646e+06	2.30717e+07	4.42146e+07	6.01927e+06	16429.4	0	0	0	0	0	0	1.21164e+07	3.21879e+07	2.99752e+07	9.14917e+07	2.02812e+07	0
1046	0	0	0	0	0	0	0	0	0	0	0	0	0	0	0	0	0	6977.29	0	1.2682e+06	1.19133e+07	0	0	0	0	0	0	0	0	0	0	2.50891e+06	8.61612e+07	3.23905e+07	3690.32	2.65229e+06
1047	0	0	0	0	0	143223	666896	2.47699e+06	15322.8	3663.24	7345.08	0	0	0	0	0	0	0	0	0	8.86247e+06	3665.8	0	0	0	0	0	0	0	0	31434.1	2.06528e+07	4.63113e+07	5.18464e+07	3.07973e+07	3.41867e+07
1048	0	0	0	0	0	0	0	0	637915	0	0	0	0	0	0	0	0	0	625020	9.48317e+06	638205	1.42403e+07	0	0	0	0	0	0	0	0	1.78697e+07	3.16586e+07	3.2532e+07	6.10299e+07	3.21124e+06	176217
1049	0	0	0	0	0	636248	2.87335e+07	6.52389e+07	1.20238e+07	0	0	0	0	0	0	0	0	1.54722e+07	4.97182e+07	8.51729e+07	3.89378e+07	1.54579e+07	721411	687026	0	0	0	0	0	4606.16	1.52212e+07	1.68561e+07	5.83527e+07	6.93518e+07	10882	0
1050	0	0	0	0	0	0	0	0	2.45606e+06	2.73117e+07	0	0	0	0	0	0	0	0	8.69454e+06	3.30223e+07	7.23226e+07	5.39195e+07	0	0	1103.51	0	0	0	0	0	2.42269e+06	1.71033e+07	1.02619e+08	3.39611e+07	679510	0
1051	0	0	0	0	0	0	0	1.37339e+07	2.20804e+07	23131	726739	1264.15	0	0	0	0	1173.67	2307.7	3.46702e+07	4667.08	3.12308e+06	51013.5	0	0	0	0	0	0	0	625391	4.99609e+06	2.81806e+07	6.24574e+07	6.98401e+07	2.3005e+07	2.65288e+06
1052	0	0	0	0	0	0	1.03456e+07	3.23094e+07	9.22636e+07	4.71869e+07	719756	18857.8	0	0	0	0	3.09472e+06	1.12033e+07	9.39323e+07	9.55477e+07	7.89598e+07	5.59478e+07	2.50061e+07	5.46472e+06	0	0	0	0	638268	8.60904e+06	9.0926e+07	1.40992e+07	5.36384e+07	1.6754e+07	0	0
1053	0	0	0	0	0	0	0	2.29372e+07	2.63764e+07	4.48265e+07	5.03217e+06	0	0	0	0	0	0	0	0	5.59183e+06	5.57011e+07	7.17657e+07	1.14365e+07	3814.57	0	0	0	0	0	0	1.02398e+07	1.36624e+07	5.77843e+07	8.97002e+07	2.76249e+07	0
1054	0	0	0	0	0	0	0	0	0	0	0	0	0	0	0	0	0	1.25527e+06	3.44593e+07	9.17875e+07	4.8414e+07	2.8657e+07	2.26843e+06	1133.89	0	0	0	0	0	0	0	0	0	692956	0	3815.18
1055	0	0	0	0	0	2.43121e+06	1.54091e+07	4.50565e+07	3.63228e+07	2.5426e+06	0	0	0	0	0	0	0	0	15085.5	2.0846e+07	2.19254e+07	657748	0	0	0	0	0	0	0	0	7009.83	1.37265e+07	3.85083e+07	3.122e+07	7.68336e+06	0
1056	0	0	0	0	0	0	2.37838e+07	7.39631e+06	5.12456e+07	9.74364e+06	0	0	0	0	0	0	0	0	3505.68	1.58443e+07	6.67074e+07	8.54807e+07	4.21033e+07	6.9651e+06	0	0	0	0	0	7.8406e+06	1.83519e+07	5.01428e+07	4.19852e+07	4.94103e+07	1.18665e+07	687046
1057	0	0	0	0	0	0	0	0	0	0	0	0	0	0	0	0	0	0	9.35154e+06	8.31943e+07	7.52756e+07	5.91092e+07	7.23244e+06	0	0	0	0	0	0	0	1.96376e+07	1.73478e+07	0	0	0	0
1058	0	0	0	0	0	0	0	0	0	0	0	0	0	0	0	0	0	0	0	636454	5.25089e+07	1.46063e+07	4.71748e+06	0	0	0	0	0	0	0	0	0	0	2.5423e+06	0	0
1059	0	0	0	0	0	0	2301.27	3.90631e+07	6.43502e+07	3.8061e+07	3.9736e+07	4.20113e+06	677045	0	3627.27	156705	0	1.28388e+06	3.42646e+07	4.21365e+07	4.63272e+07	4.00483e+07	0	0	0	0	0	0	0	1.29013e+06	4.90704e+07	5.04968e+07	9.36747e+07	2.97604e+07	0	0
1060	0	0	0	0	0	0	15015.7	3.87315e+07	1.01349e+08	5.99315e+07	6.65906e+06	2.65739e+06	0	0	0	0	0	0	0	0	4.37729e+06	9.5316e+06	0	0	0	0	0	0	0	10116.9	2.32593e+07	2.65643e+07	5.74553e+07	4.59975e+07	1.24724e+07	0
1061	0	0	0	0	0	0	0	1.07831e+07	0	0	0	0	0	0	0	0	0	0	0	1162.22	642165	0	0	11282.4	2.98318e+06	1.44675e+06	0	0	0	0	2.43672e+06	1.92406e+06	6.24976e+07	6.4867e+07	2.57295e+06	0
1062	0	0	0	0	0	0	0	0	3.80685e+06	19511.2	0	0	0	0	0	0	0	0	0	0	0	0	0	0	0	0	0	0	0	1154.75	3.0616e+06	4.59671e+07	5.19795e+07	7.04071e+07	1.76486e+07	0
1063	0	0	0	0	0	0	0	7.43613e+06	5.81626e+07	3.56843e+07	2.08887e+06	0	0	0	0	0	0	0	2.88225e+07	9.13948e+07	9.85659e+07	5.91506e+07	2.32404e+07	1.07812e+07	0	0	0	0	0	0	15028.6	2.1182e+07	5.28215e+07	7.06781e+07	3.13034e+07	2.642e+06
1064	0	0	0	0	0	0	0	0	3.10545e+06	0	0	0	0	0	0	0	0	0	0	635969	1.33153e+06	0	15960.5	0	0	0	0	0	0	0	0	3555.54	2.74485e+07	2.06171e+07	3690.22	0
1065	0	0	0	0	0	0	1.58924e+07	5.49674e+07	5.05584e+07	2.79239e+07	128281	725126	0	0	0	0	9114.82	0	0	0	646018	0	0	0	0	0	0	0	0	1.97889e+07	3.09715e+07	9.77846e+06	5.86768e+07	6.68476e+07	3692.36	7592.58
1066	2.87461e+06	0	0	0	0	0	6926.35	1.17006e+07	5.52391e+07	2.74553e+07	7.32323e+06	0	704416	0	0	0	0	0	0	6.47247e+06	4.42822e+06	0	0	0	0	0	0	0	0	0	0	3553.5	0	3.37801e+07	0	0
1067	0	0	0	0	0	0	0	0	9.99673e+06	3.40774e+07	7.42733e+06	5.11229e+06	705247	0	0	0	0	1.12211e+07	2.13513e+07	6.70971e+07	5.14184e+07	4.03082e+07	0	0	0	0	0	0	0	0	7.28693e+06	3.50597e+07	6.42429e+07	5.2241e+07	1.39096e+07	49831.3
1068	0	0	0	0	0	0	0	0	2.03662e+07	1.76813e+07	2.5589e+06	0	0	0	0	0	0	0	0	0	0	1.14179e+07	0	0	0	0	0	0	0	8956.34	1.71342e+07	1.30575e+07	5.70844e+07	6.08257e+07	15959.1	0
1069	731980	0	0	0	0	0	625720	1.04761e+07	5.5422e+07	0	0	0	0	0	0	0	0	0	3.81387e+06	0	0	0	0	0	0	0	0	0	0	0	1150.73	3.75643e+06	6.76273e+07	5.12388e+07	3.26593e+06	1.23036e+07
1070	0	0	0	0	0	0	0	0	0	0	0	0	0	0	0	0	0	16292.1	4.85594e+06	7.5802e+06	0	0	0	0	0	0	0	0	146005	9.33542e+06	3.18547e+07	4.13336e+07	3.73272e+07	1.05059e+07	0	0
1071	0	0	0	0	0	0	0	0	9.18767e+06	0	0	0	0	0	0	0	0	2.56096e+06	6.22271e+07	1.13661e+08	3.88935e+07	6.56337e+07	1.34481e+07	26096.4	0	0	0	0	0	625389	1.20728e+07	2.33939e+07	5.72103e+07	7.85613e+07	3.57389e+06	0
1072	0	0	0	0	0	0	0	0	0	0	11024.7	0	0	0	0	0	0	0	0	1.29595e+06	2.44314e+06	0	0	0	10990.9	0	0	0	0	162210	1.52474e+07	9.50312e+06	5.9122e+07	1.74689e+07	1.1814e+07	0
1073	0	0	0	0	0	0	0	0	1.492e+07	1.72914e+07	12040.1	0	0	0	0	0	0	0	0	0	1.01395e+07	0	0	0	0	0	0	0	0	0	0	3.75802e+06	4.23611e+07	6.12053e+07	0	0
1074	0	0	0	0	0	0	1.3622e+07	4.63332e+07	6.40116e+07	5.77495e+07	7.23458e+06	0	0	0	0	0	0	0	0	42063.8	3.65248e+07	7.13597e+07	1.93146e+07	9.26492e+06	0	0	0	0	0	0	6939.39	5.54434e+06	4.86976e+07	6.13075e+07	4.613e+07	5.7627e+07
1075	0	0	0	0	0	0	0	0	0	0	0	0	0	0	0	0	0	288625	2.94517e+07	2.02857e+07	5.31871e+07	5.29817e+07	1.91164e+07	3.66875e+06	0	0	0	0	0	11266.8	1.24533e+07	1.10588e+07	4.49033e+07	3.66272e+07	702187	0
1076	0	0	0	0	0	0	0	0	0	0	0	0	0	0	0	0	0	0	634783	6.3265e+07	8.12014e+07	5.94001e+07	1.51861e+07	721879	0	0	0	0	0	0	2.42583e+06	24696.6	3.76722e+07	3.52846e+07	6.53836e+06	0
1077	0	0	0	0	0	0	0	0	0	0	0	0	0	0	0	0	0	0	3.09198e+06	1.73252e+07	6.46286e+07	7.77618e+07	376771	0	0	0	0	0	0	0	2.44635e+06	1.86893e+07	4.61159e+07	7.01622e+07	3.17375e+07	1.13538e+07
1078	0	0	0	0	0	7.27739e+06	5.62772e+07	9.57375e+07	6.81556e+07	2.18515e+07	4.16867e+06	7.13966e+06	0	0	0	0	0	0	0	1.45388e+07	6.46073e+07	2.58062e+07	1.32221e+06	0	0	0	0	0	0	641274	2.48635e+07	6.30232e+07	5.616e+07	5.25656e+07	0	0
1079	0	0	0	0	0	0	1.31723e+06	4.71703e+07	5.45751e+07	5.16771e+06	662627	0	16041.3	0	0	0	0	0	8.04846e+06	6.20637e+07	1.01019e+08	4.86825e+07	3.31406e+06	1.48183e+06	0	0	0	0	0	0	0	1.10819e+07	3.23893e+07	9.44971e+07	1.63815e+07	685008
1080	0	0	0	0	0	0	0	0	0	0	0	0	0	0	0	0	0	0	1.28847e+06	2.06728e+07	6.89765e+07	9.51109e+07	3.14044e+07	6.1058e+06	5.39654e+06	1.53416e+06	3.22001e+06	4.3438e+07	5.03808e+07	5.58367e+07	5.38081e+07	7.24055e+07	5.98588e+07	8.68497e+07	1.67447e+07	0
1081	0	0	0	0	0	628763	0	0	0	0	0	0	0	0	0	0	0	0	0	0	0	0	0	2.65236e+06	4.76883e+06	22957.2	719853	0	0	658245	2.84928e+07	8.74426e+07	1.03074e+08	5.79833e+07	4.28626e+07	2.14062e+07
1082	0	0	0	0	0	0	1.85985e+07	61151.1	0	0	0	0	0	0	0	0	0	0	0	651227	1.3293e+07	2.83839e+07	1.55629e+06	0	0	0	0	0	0	0	0	636093	4.39959e+06	4.40263e+07	7.59966e+06	0
1083	0	0	0	0	0	0	7.24342e+06	2.48513e+07	5.36756e+07	4.38644e+07	4.41116e+07	3.54875e+06	0	0	0	0	0	0	625784	656305	2.88418e+07	0	0	0	0	0	0	0	0	0	0	0	0	0	0	0
1084	0	0	0	0	0	15138.6	3.66281e+06	1169.79	2.12177e+07	5.77266e+06	0	0	0	0	0	0	0	0	0	0	0	2.54677e+06	0	0	0	0	0	0	0	0	2.53714e+06	9.49596e+06	6.29539e+07	7.17933e+07	7.96867e+06	227388
1085	0	0	0	0	0	0	0	2.83649e+06	1.90233e+07	2.44076e+07	2.06036e+07	727104	0	0	0	0	0	153306	2.43852e+07	5.3238e+07	8.89588e+07	1.01968e+08	3.72627e+07	4.18554e+06	0	0	0	0	0	4.84426e+06	3.04078e+07	3.74816e+07	7.23934e+07	3.08173e+07	7331.22	0
1086	0	0	0	0	0	1154.61	652699	0	2.46558e+06	0	0	0	0	0	0	0	0	0	676690	3.23777e+07	8.10717e+07	5.9863e+07	1.42304e+06	0	2.5783e+06	2.56038e+06	0	0	0	0	6967.83	0	0	15847.1	0	0
1087	0	0	0	0	0	16284.1	627132	814995	2.00397e+07	4.43171e+07	4.35789e+06	62402.2	0	0	0	0	0	0	6981.63	5.44438e+07	8.14726e+07	4.39481e+07	0	1.50658e+06	0	0	0	0	0	629406	4.88212e+06	9.25808e+06	8.36907e+07	9.08812e+07	1.69187e+07	3.43363e+07
1088	0	0	0	0	0	0	0	0	0	0	0	0	0	0	0	0	0	0	1.97407e+07	9.00279e+07	6.54602e+07	5.10125e+06	0	0	0	0	0	0	0	627690	4.82941e+07	4.92577e+07	4.75306e+07	1.06799e+08	3.32913e+07	2.14153e+06
1089	0	0	0	0	0	0	0	9044.68	3.02352e+07	44473.8	0	0	0	0	0	0	0	0	5.51555e+06	1.59024e+07	6.46544e+07	3.7557e+07	4.02951e+06	0	0	0	0	0	0	0	626078	7.01158e+06	3.53626e+07	9350.3	0	0
1090	0	0	0	0	0	0	0	154842	647280	5.76391e+06	0	0	0	0	0	0	0	0	6939.39	2.43876e+07	5.24413e+07	6.57367e+07	1.80795e+07	753501	0	0	0	0	0	8.71414e+06	5.5055e+06	1.1914e+07	5.82698e+07	5.30602e+07	712534	0
1091	0	0	0	0	0	16284	0	1.92952e+07	5.98205e+07	2.08918e+07	1.49284e+06	0	0	0	0	0	636524	2.45417e+06	2.84781e+07	3.06909e+07	5.22472e+07	5.04911e+07	14661.2	0	0	0	0	0	0	0	2.20653e+07	3.02005e+07	9.5012e+07	5.65021e+07	0	0
1092	0	0	0	0	0	0	626529	0	4.91856e+06	5.04536e+06	0	0	0	0	0	0	0	0	7001.35	635073	5.64956e+06	1.50893e+07	0	0	0	0	0	0	0	15133.9	9.33768e+06	1.73706e+07	5.99903e+07	8.151e+07	3.43006e+07	0
1093	0	0	0	0	0	0	1.8834e+06	3.12166e+07	4.33205e+07	3.39187e+07	11018	1264.15	705176	0	0	0	0	2310.06	762218	2.83423e+07	5.96946e+07	2.47992e+07	677255	0	0	0	0	0	0	0	43636.1	2.45567e+07	2.91648e+07	5.83094e+07	4.29004e+07	2.64801e+06
1094	0	0	0	0	0	0	1.25355e+06	1.77889e+07	1.45482e+07	0	0	0	0	0	0	0	0	0	1.25592e+06	3.23206e+07	7.51765e+07	3.70065e+07	0	0	0	0	0	0	0	0	10479.3	1.39615e+07	4.15872e+07	7.04395e+07	1.68076e+07	4.15887e+06
1095	0	0	0	0	0	1154.75	0	5.73374e+06	8.75476e+06	4.63937e+06	723014	0	0	0	0	0	0	0	0	9.47105e+06	2.11942e+07	4.0755e+07	1.1256e+07	0	0	0	0	0	0	0	0	0	3.72142e+06	4.91182e+07	2.55971e+06	0
1096	0	0	0	0	0	1154.35	3.23962e+07	9.66067e+07	8.33439e+07	8.14322e+07	4.14821e+06	0	0	0	0	0	0	2.43077e+06	3.13021e+06	6.20209e+07	6.93641e+07	4.68601e+07	4.26404e+06	2.53402e+07	0	0	0	0	0	626523	5.25024e+07	7.26071e+07	2.90024e+07	7.08202e+07	235358	0
1097	0	0	0	0	0	0	646100	9.49446e+06	8.70554e+06	5.05011e+06	0	0	0	0	0	0	0	3516.51	4.45142e+07	5.95855e+07	8.26598e+07	2.65455e+07	0	0	0	0	0	0	0	1152.91	7.23265e+06	2.58168e+07	1.41753e+07	6.33143e+07	1.3725e+07	2.65081e+06
1098	1.45355e+06	0	0	0	0	16244.8	1.90305e+07	5.79231e+07	5.11478e+07	1.24691e+07	2.55624e+06	0	0	0	0	0	0	626627	1.03066e+07	0	6.21247e+06	656148	1099.77	764335	0	0	0	0	0	0	636958	9.83703e+06	3.98459e+07	6.57601e+07	1.28045e+07	0
1099	0	0	0	0	0	0	0	0	0	0	0	0	0	0	0	0	0	0	0	0	1172.08	0	0	0	0	0	0	0	0	1155.01	47625.3	1.28909e+07	4.70591e+07	9.73332e+06	71486.9	1.47731e+06
1100	0	0	0	0	0	0	1.4156e+07	5.9139e+07	6.12471e+07	4.49781e+07	3.26017e+06	0	0	0	0	0	0	0	0	1.06407e+07	7.90805e+06	0	0	0	0	0	0	2.4841e+06	3.73194e+06	4.42615e+07	4.40718e+06	3.47435e+07	4.36496e+07	6.56049e+07	1.43354e+06	4.02469e+06
1101	0	0	0	0	0	0	2.57061e+06	3.15454e+07	9.55399e+07	4.08864e+07	16670	0	0	0	59491.4	0	0	0	0	15328.6	4.38411e+06	10614.1	60396.4	0	0	0	0	0	0	0	0	0	2.48359e+06	9.55536e+06	4.49292e+06	686869
1102	0	0	0	0	0	0	0	0	1168.31	0	0	0	0	0	0	0	15380.7	627017	4.02576e+07	6.8519e+07	7.5426e+07	3.78581e+07	264895	11282.2	0	0	0	0	0	0	3505.58	1.23586e+07	2.7205e+07	6.47431e+07	4.84972e+06	0
1103	0	0	0	0	0	0	4.29479e+06	4.11376e+07	8.85657e+06	0	0	0	0	0	0	0	0	0	1.11047e+07	3.21485e+07	5.9524e+07	4.73622e+07	2.96454e+07	1.47645e+06	0	0	0	0	0	0	0	4.35373e+06	637915	0	0	0
1104	0	0	0	0	0	0	0	0	0	0	0	0	0	0	0	0	0	0	0	9.48497e+06	2.56535e+06	657983	0	0	0	0	0	0	9118.4	1153.87	1.63116e+07	2.46565e+07	7.32956e+07	6.07109e+07	83444.3	0
1105	0	0	0	0	0	0	0	1.34703e+07	5.22486e+07	4.75101e+07	9.03931e+06	18813.1	0	0	0	0	0	1.25641e+06	7.86668e+06	1.01542e+08	4.36616e+07	3.48822e+07	1.82133e+07	4.87921e+06	0	0	0	0	0	0	3.05678e+06	5.35657e+07	9.50454e+07	6.42074e+07	6.765e+06	0
1106	0	0	0	0	0	0	0	70190.5	5.55505e+06	3.2229e+06	0	0	0	0	0	0	0	0	0	1169.01	3.11717e+06	3.2298e+06	18283.1	0	0	0	0	0	0	0	2.44666e+06	1.91201e+07	3.58125e+07	8.52761e+07	1.50076e+07	4.88983e+06
1107	0	0	0	0	0	1.93006e+06	3.78423e+07	9.71215e+07	5.94155e+07	1.44067e+07	15958.1	0	0	0	0	0	0	0	0	1.95727e+06	15322.8	0	0	0	0	0	0	0	0	0	0	639391	2.23344e+07	1.55312e+07	0	0
1108	0	0	0	0	0	16288.3	9.30356e+06	2.25108e+07	4.87563e+07	2.68013e+07	3.97236e+06	15236.5	0	0	0	0	0	0	4.91841e+06	2.58819e+07	4.09355e+07	2.08422e+07	0	0	0	0	0	0	0	153253	2.96115e+07	2.94951e+07	9.41455e+06	792870	0	0
1109	0	0	0	0	0	0	0	4.39533e+06	3.2876e+07	656533	7332.26	0	0	0	0	0	0	0	0	0	1.11131e+07	8.26847e+06	0	0	0	0	0	0	0	0	1.25725e+06	14135	2.8207e+07	6.60118e+07	15906.4	0
1110	0	0	0	0	0	0	625784	1.55975e+07	6.36437e+07	1.22208e+07	2.68876e+06	1.54225e+06	0	0	0	0	0	0	0	0	0	0	0	0	0	0	0	0	0	0	38231.7	2.11645e+07	8.15329e+07	8.64273e+07	8.42661e+06	0
1111	0	0	0	0	0	0	641984	3.34209e+06	3.8943e+07	5.18273e+07	1.48014e+07	3.66189e+06	0	0	0	0	0	0	0	0	9.4925e+06	0	0	0	0	0	0	0	0	644622	10506.3	1.28417e+06	4.50812e+06	5.06399e+07	1.93841e+07	3.41728e+06
1112	0	0	0	0	0	0	0	0	3.11425e+06	1.23466e+07	0	0	60750.2	0	0	0	0	627528	3492.4	2.33195e+07	5.07436e+07	5.03697e+07	1.59146e+07	3.61522e+07	0	0	0	0	0	1154.83	17492.5	1.12732e+07	3.6401e+07	3.68203e+07	4.71707e+06	0
1113	0	0	0	0	0	0	0	0	0	0	0	0	0	0	0	0	0	3.12294e+06	2.50206e+07	5.80458e+07	5.78139e+07	4.18033e+07	702152	0	0	0	0	0	0	0	6.06389e+06	1.85643e+07	1.17187e+07	6.02452e+07	1.73172e+07	1.30928e+07
1114	0	0	0	0	0	0	0	7058.68	3.75524e+06	2.7616e+07	0	0	0	0	0	0	0	2.63669e+07	3.37427e+07	4.66969e+07	7.62793e+07	9.86322e+06	0	0	0	0	0	0	0	0	0	0	4.53298e+07	5.0642e+07	2.58862e+06	0
1115	1.53866e+06	0	0	0	0	15097	1.63084e+07	5.43764e+07	4.92643e+07	2.23242e+07	76469.3	0	0	0	0	0	0	0	0	0	0	0	0	0	0	0	0	0	0	0	0	1.90972e+06	5.37059e+07	5.31884e+07	1.87783e+07	5.17317e+07
1116	0	0	0	0	0	0	8.54253e+06	6.12193e+07	5.22842e+07	4.05261e+07	0	0	0	0	0	0	0	0	0	36494.8	2.942e+07	2.10228e+07	40279.1	0	733712	0	0	0	0	0	0	0	0	5.92198e+06	731777	0
1117	0	0	0	0	0	0	0	1.27102e+06	31748.8	664874	2.61833e+06	0	0	0	0	0	0	15139.1	0	0	4.22985e+07	2.60728e+07	1.77455e+07	34729.9	0	0	0	0	0	0	10436.8	1.12759e+07	2.13636e+07	4.55286e+07	8.42173e+06	0
1118	0	0	0	0	0	0	0	1.3551e+07	5.78178e+07	3.07264e+07	4.65629e+06	0	0	0	0	0	0	0	7006.76	1.04447e+07	5.15209e+07	1.66975e+07	9.2665e+06	0	7413.03	0	0	0	0	628900	1.21247e+07	1.63382e+07	6.92157e+07	7.96455e+07	61121.4	752874
1119	0	0	0	0	0	0	0	0	0	0	0	0	0	0	0	0	0	0	622178	6.33269e+07	7.1477e+07	6.01103e+07	127775	27966.2	0	0	0	0	0	0	0	0	4.89002e+06	2.57175e+06	7.9795e+06	3.27191e+06
1120	0	0	0	0	0	0	0	0	0	0	0	0	0	0	0	0	0	0	1.26292e+06	3.83646e+07	3.46928e+07	2.45111e+07	3687.15	0	0	0	0	0	0	1.87845e+06	1.16428e+07	7.08295e+07	6.50108e+07	8.40433e+07	6.84834e+06	828003
1121	0	0	0	0	0	0	3.03774e+06	3511.91	3.09681e+06	0	0	0	0	0	0	0	0	0	0	0	0	0	0	0	6.61073e+06	0	0	0	0	0	0	636182	8.01829e+06	3.28282e+07	2.80294e+06	9852.6
1122	0	0	0	0	0	0	0	0	0	0	0	0	0	0	0	0	2345.57	6.18178e+06	4.30758e+07	4.99639e+07	1.01335e+08	7.58101e+07	4.76077e+07	1.66938e+07	0	0	0	0	0	0	0	0	0	4.04535e+06	0	0
1123	0	0	0	0	0	15131	2.91952e+07	5.86488e+07	3.71772e+07	3.43928e+07	0	0	0	0	0	0	0	0	4.82624e+06	2.71311e+07	4.81019e+07	1.48266e+07	0	0	0	0	0	0	0	143139	1.34279e+07	9.8155e+06	7.70234e+07	8.24146e+07	2.49477e+07	7613.92
1124	0	0	0	0	0	0	2.10067e+07	7.17819e+07	6.03997e+07	4.21806e+07	1.37413e+07	2.93184e+07	0	0	0	0	0	0	0	3.07541e+06	3.7884e+07	4.30001e+07	6.07654e+06	0	4815.21	0	0	0	0	0	0	6.13133e+06	4.70242e+07	6.73434e+07	1.04769e+06	0
1125	0	0	0	0	0	0	1.88815e+07	8.70452e+07	8.58128e+07	4.96621e+07	8.46537e+06	0	0	0	0	0	0	0	0	0	0	0	0	0	0	0	0	0	0	1.25799e+06	2.63666e+07	2.43924e+07	21236.9	6.43318e+06	3.49204e+06	687144
1126	0	0	0	0	0	0	0	0	3.09214e+06	3.16468e+06	0	0	0	0	0	646095	2.58183e+06	3.24061e+07	2.97382e+07	6.79776e+07	7.72134e+07	3.90175e+07	1.225e+07	703482	0	0	0	0	0	143145	9.67582e+06	1.31582e+07	6.02169e+07	3.82399e+07	6.30875e+06	2.66649e+06
1127	0	0	0	0	0	0	0	650702	3.12878e+06	0	0	0	0	0	0	0	0	0	15088.4	1.99114e+07	3.4354e+07	1.64442e+07	6.64677e+06	12510.4	0	0	0	0	0	785366	2.46853e+06	8.65639e+06	1.05445e+07	5.13554e+06	3.2465e+06	3818.56
1128	0	0	0	0	0	0	0	0	1.75485e+07	9.17518e+06	0	0	0	0	0	0	0	0	0	0	0	0	0	0	0	0	0	0	0	0	2.44685e+06	3.41277e+07	5.05009e+07	8.25695e+06	0	0
1129	0	0	0	0	0	0	0	637614	0	0	0	0	0	0	0	0	0	0	8.68591e+06	3.09987e+06	9.78657e+06	0	0	0	0	0	0	0	0	0	0	660499	1.34218e+07	1.38307e+07	1.4894e+07	0
1130	0	0	0	0	0	0	0	1.35213e+07	6.45115e+07	2.4886e+06	0	0	0	0	0	5.62908e+06	3.44188e+07	7.28942e+07	5.48122e+07	1.15107e+08	8.84023e+07	5.27851e+07	3.45769e+06	3808.13	0	0	0	0	0	0	2.44169e+06	5.59657e+07	5.6087e+07	7.43332e+07	1.44252e+06	689388
1131	0	0	0	0	0	3.68142e+06	0	0	2.51004e+07	1.01634e+07	0	0	665998	0	0	0	0	1155.12	2.92117e+07	9.21814e+07	1.02048e+08	3.7317e+07	1.70328e+07	1.45572e+06	0	0	0	0	0	0	0	2.51165e+06	4.52364e+07	8.12205e+07	1.17117e+07	0
1132	0	0	0	0	0	0	0	1.67984e+07	3.76866e+07	2.50178e+07	2.27238e+06	0	0	0	0	0	0	0	0	7086.57	4.92317e+07	3.57042e+07	0	0	60788.1	0	0	0	0	0	7000.63	3.20069e+07	6.8336e+07	5.46887e+07	33897	0
1133	0	0	0	0	0	0	0	0	0	0	0	0	0	0	0	0	0	0	0	8.86152e+06	2.72279e+07	2.41074e+07	5.40231e+06	3782.69	0	0	0	0	0	0	3.04034e+07	4.28842e+07	1.66826e+07	3.79059e+07	0	0
1134	0	0	0	0	0	0	6.71387e+06	2.55323e+07	4.09892e+07	3666.92	0	0	0	0	0	0	0	0	1.54143e+07	14001.9	1171.75	0	0	0	0	0	0	0	0	143161	1.47172e+07	6.27232e+06	2.67578e+07	1.06106e+08	2.07718e+07	1.25432e+07
1135	0	0	0	0	0	0	0	2.4662e+06	2.14705e+07	1.80312e+07	9.58671e+06	0	0	0	0	0	0	0	1150.8	1.27152e+06	8.84834e+06	1.16254e+07	10695.4	0	0	0	0	0	0	645370	2.54181e+07	4.16736e+07	4.6719e+07	8.25402e+07	4.18831e+07	6.5071e+06
1136	0	0	0	0	0	0	0	0	0	0	0	1134.07	0	0	0	0	0	8959.03	1.58659e+07	5.19596e+07	6.72509e+07	6.53354e+07	3.67626e+07	0	0	0	0	0	0	0	0	3.1119e+07	4.93799e+07	3.27655e+07	0	0
1137	0	0	0	0	0	0	0	0	0	0	0	0	0	0	0	0	0	0	7.91717e+06	1.96507e+06	639879	2.56125e+06	0	0	0	0	0	0	0	0	0	14095.2	4.19502e+07	3.83118e+07	10913.7	0
1138	0	0	0	0	0	16259.2	2.08492e+07	1.39275e+07	0	0	0	0	0	0	0	0	0	0	0	7061.17	3.44616e+07	6.57649e+07	5.09599e+06	724170	0	0	0	0	0	0	24484.3	2.68326e+07	8.29166e+07	7.29814e+07	1.07412e+07	3.07489e+07
1139	0	0	0	0	0	0	0	0	0	0	0	0	3709.33	0	0	0	0	0	10504.2	4.99165e+07	5.8334e+07	7.27605e+07	1.78507e+07	0	0	0	0	0	0	0	0	4.93324e+06	3.78576e+07	2.98603e+07	2.13873e+06	0
1140	0	0	0	0	0	0	0	0	0	0	0	0	0	0	0	0	0	0	0	0	630527	2.55855e+06	682792	0	0	0	0	0	638425	785938	5.63147e+06	3.27899e+07	3.78566e+07	7.23543e+07	1.47479e+07	0
1141	0	0	0	0	0	0	3.06351e+06	0	0	0	0	0	0	0	0	0	0	0	3.68432e+06	0	32953.3	0	0	0	0	0	0	0	0	1.50027e+07	1.45225e+07	8.32443e+07	8.93904e+07	8.09919e+07	4.29573e+07	3.08993e+07
1142	0	0	0	0	0	0	0	0	1.24813e+07	1.59103e+07	0	0	0	0	0	0	0	0	9.98253e+06	8.21188e+07	7.71962e+07	4.71614e+07	0	0	0	0	0	0	0	0	8.65979e+06	2.45547e+06	1.12424e+07	0	0	753317
1143	3689.71	702152	0	0	0	0	626941	0	637974	0	0	0	0	0	0	0	0	0	0	2.48848e+06	0	1209.73	0	0	0	0	0	0	0	2305.85	1.20958e+07	2.09952e+07	6.52808e+07	5.76454e+07	1.5252e+07	0
1144	0	0	0	0	0	0	9.74508e+06	3.3614e+07	0	0	0	0	0	0	0	0	0	1.2529e+06	5.22104e+07	1.01907e+08	8.10083e+07	7.1681e+07	1.3361e+07	8.0168e+06	0	0	0	0	0	0	0	0	1.68272e+07	1.99834e+07	0	0
1145	0	0	0	0	0	0	2.03452e+07	655460	0	0	0	0	0	0	0	0	0	0	0	0	2.46692e+06	8.2746e+06	730469	0	0	0	0	0	0	628469	7.42006e+06	2.46487e+07	5.94338e+07	7.58861e+07	4.22862e+07	3813.34
1146	0	0	0	0	0	0	3495.97	2.112e+07	4.98067e+07	2.72239e+07	2.15332e+06	0	0	0	0	0	0	0	6952.85	0	0	0	0	0	733288	0	0	0	16554.4	5757.48	3.78812e+07	9.11124e+07	9.94585e+07	4.1275e+07	1.66299e+07	81043.4
1147	0	0	0	0	0	0	2.41137e+06	1.08154e+07	1.8824e+07	1.66001e+07	0	0	0	0	0	0	0	0	0	0	0	1.30455e+07	7.22275e+06	8.00563e+06	2.52302e+06	2.04148e+07	6.55468e+06	15486.4	1.10772e+06	4.40412e+07	2.9426e+07	3.84915e+07	7.98015e+07	5.67658e+07	0	0
1148	0	0	0	0	0	629048	1.23623e+07	8.5801e+07	4.98954e+07	8.426e+06	737746	0	0	0	0	0	0	0	2.43165e+06	3.5516e+07	5.88213e+07	1.26617e+07	2.62462e+06	7554.88	0	0	0	0	0	0	2.12927e+07	4.34543e+07	7.96639e+07	8.96282e+07	3.63484e+07	3.88519e+07
1149	0	0	0	0	0	0	0	1.25457e+07	5.01133e+07	664265	78793.7	0	0	0	0	0	0	0	0	0	1171.19	3665.69	0	0	0	0	0	0	0	16284.1	1.72613e+07	4.82439e+07	5.41828e+07	7.02106e+07	1.32111e+07	2.6512e+06
1150	0	0	0	0	0	0	0	0	0	3643.52	0	0	0	0	0	0	0	0	3504.35	5.04902e+07	8.6996e+07	5.87755e+07	1.25278e+07	3816.41	0	0	0	0	0	0	668412	9.83175e+06	4.17371e+07	5.07997e+07	9.65714e+06	696558
1151	0	10942.3	0	0	0	0	15088.4	1.85291e+07	1.25169e+07	0	701904	2.20039e+06	0	0	0	0	9111.54	778345	3.21275e+07	9.77292e+07	3.67634e+07	4.2125e+07	0	0	0	0	0	0	0	0	0	0	0	0	60510.1	687105
1152	0	0	0	0	0	1154.72	3.06871e+06	3.13911e+06	4.40884e+06	2418.83	0	0	0	0	0	0	0	1150.95	2.30941e+07	5.46129e+07	6.55661e+07	3.34397e+07	8414.79	0	0	0	0	0	0	0	0	0	9.25751e+06	2.07685e+07	7.26267e+06	0
1153	0	0	0	0	0	0	0	0	0	0	0	0	0	0	0	0	2.47082e+06	1.24017e+07	7.21925e+07	1.11809e+08	5.37375e+07	1.72718e+07	1.47164e+06	0	0	0	0	0	0	0	3497.81	1.98791e+07	5.7754e+07	7.00228e+07	0	0
1154	0	0	0	0	0	0	17389.4	1.18627e+07	645521	83249.9	701975	0	3708.81	0	0	0	0	0	1.10799e+07	5.60547e+07	6.51098e+07	6.59923e+07	1.35356e+07	0	0	0	0	0	0	3.70621e+06	7.26961e+07	5.1487e+07	2.64783e+07	4.78259e+07	9.31634e+06	0
1155	0	0	0	0	0	0	0	0	0	0	0	0	0	0	0	0	0	0	4.33293e+06	5.61806e+07	6.61377e+07	9.26156e+07	5.03182e+07	5.67602e+06	0	0	0	0	0	0	10494.2	2.72925e+07	4.34087e+07	4.66255e+07	1.53026e+07	0
1156	0	0	0	0	0	0	6.04275e+06	7.39878e+07	1.16808e+07	8.28843e+06	21826.6	0	1.43784e+06	0	63104.6	0	0	0	1.26459e+06	6.0588e+07	8.15455e+07	4.23002e+07	1.66779e+07	7569.59	0	0	0	0	0	0	0	1.80033e+07	5.95018e+07	8.74815e+06	3.90526e+06	2.65675e+06
1157	0	0	0	0	0	0	6920.55	1.00141e+07	3.258e+07	0	0	62471.7	0	0	0	0	0	644156	3.69753e+06	2.65409e+07	9.42804e+07	2.45618e+07	8.6959e+06	66196.8	0	0	0	0	0	8964.4	2.55346e+07	8.02903e+06	5.69367e+06	2.52976e+06	0	0
1158	0	0	0	0	637935	1.34394e+07	5.72914e+07	6.03586e+07	7.69581e+07	1.60425e+07	0	0	0	0	0	0	0	0	0	0	0	0	0	0	0	0	0	0	0	0	2.43312e+06	6.23039e+06	3.14764e+06	0	0	0
1159	2.91643e+06	0	0	0	0	1155.09	6922	2.45928e+06	656375	4.82098e+06	5.69981e+06	0	0	0	0	0	0	624354	9.13954e+06	4.90278e+07	5.32066e+07	1.71591e+06	5.32671e+06	753353	0	0	0	0	0	0	0	3.77394e+06	4.38125e+07	5.50963e+07	0	0
1160	0	0	0	0	0	0	0	0	0	0	0	0	0	0	0	0	0	30224.7	4.0559e+07	4.18622e+07	7.69226e+07	9.8691e+07	2.97536e+07	2.1667e+06	0	0	0	0	0	0	7.79639e+06	6.63745e+07	7.70722e+07	5.31234e+07	1.55987e+07	1.5669e+07
1161	0	0	0	0	0	0	0	0	0	0	0	0	0	0	0	0	0	0	0	0	1.1993e+07	664259	75956.2	687085	0	0	0	7133.24	2.47635e+06	2.70329e+07	1.1491e+07	4.94927e+07	8.44548e+07	8.14396e+07	2.08386e+07	0
1162	0	0	0	0	0	0	15066.4	3.76447e+07	4.76494e+07	2.77114e+07	1.02177e+07	754181	0	0	0	0	0	0	0	0	0	0	0	0	0	0	0	0	0	0	0	11770.9	6.71912e+07	9.01837e+07	1.40497e+07	16517.8
1163	0	0	0	0	0	0	0	0	0	0	0	0	2.58065e+06	0	0	0	3.14781e+06	0	2.75644e+07	8.11002e+07	6.8428e+07	3.59385e+07	3677.04	11284.3	0	0	0	0	0	0	1.59548e+07	5.486e+07	3.73053e+07	8.24715e+07	3.17564e+06	0
1164	0	0	0	0	0	0	0	0	0	0	0	0	0	0	0	0	0	0	4.32326e+06	5.46179e+07	6.21802e+07	5.35863e+07	1.85313e+07	0	0	0	0	0	638777	0	7001.14	3.58665e+07	5.43286e+07	3.86521e+07	2.62708e+07	15124.3
1165	0	0	0	0	0	0	1.7151e+07	1.91521e+06	0	0	0	0	0	0	0	0	0	15131	9.9515e+06	1.3453e+06	2.14679e+07	787222	0	0	2.57292e+06	0	0	0	0	0	2.42355e+06	5.58876e+06	4.7744e+07	4.85937e+07	0	0
1166	0	0	0	0	0	0	0	0	0	0	0	0	0	0	0	0	0	0	0	0	0	0	0	0	0	0	0	0	9116.61	1.88251e+06	1.4263e+07	2.34263e+07	4.95345e+07	5.71236e+07	8.9831e+06	0
1167	3.13033e+06	701781	690639	2.48956e+06	4.99424e+06	1.22144e+07	6.2179e+06	2.1848e+07	1.01711e+07	9.18196e+06	0	0	0	0	0	0	0	0	10440.3	2.22854e+07	1.91572e+06	5.0829e+06	0	0	0	0	0	0	0	628077	2.44921e+06	1.84272e+07	5.77316e+07	4.50996e+07	662686	0
1168	0	0	0	0	0	0	0	7.70274e+06	4.38581e+07	2.62566e+07	1.89092e+07	9.876e+06	0	0	0	0	8.87391e+06	4.94455e+06	5.00434e+07	7.91052e+07	1.84406e+07	656755	0	0	0	0	0	0	0	0	0	0	0	15847.1	0	0
1169	0	0	0	0	0	0	0	818642	1.18635e+07	0	0	0	0	0	0	0	638817	8.7049e+06	7.03496e+07	3.83206e+07	1.81043e+07	1.46044e+06	0	0	0	0	0	0	0	0	0	0	0	0	0	0
1170	0	0	0	0	0	639070	1.24166e+07	5.1009e+07	1.1312e+07	0	0	0	0	0	0	0	0	0	0	644970	1.79912e+07	655474	0	0	0	0	0	0	0	1.28945e+06	3.82936e+07	4.95308e+06	652724	15833.7	3692.26	0
1171	0	0	0	0	0	0	0	0	1.30064e+06	3.83241e+06	3691.34	0	0	0	0	0	0	637149	3.18924e+07	2.23069e+07	5.74048e+07	4.22282e+07	2.01002e+07	0	0	0	0	0	0	8962.91	2.45513e+06	4.93729e+07	6.96872e+07	4.16008e+07	15925.1	751689
1172	0	0	0	0	0	0	0	0	0	0	0	0	0	0	0	0	145871	5.45992e+06	1.38681e+07	5.42789e+07	4.79e+07	1.643e+07	0	0	0	0	0	0	0	0	6.66014e+06	4.64355e+07	6.10926e+07	9.79676e+07	1.76994e+07	0
1173	0	0	0	0	0	0	0	0	639165	0	60513.3	0	0	0	0	0	27305.4	2.79275e+07	2.68223e+07	6.05466e+07	4.93942e+06	2.54076e+06	76324.6	0	0	0	0	0	0	0	3.03521e+06	1.98426e+07	1.67845e+07	0	0	0
1174	0	0	0	0	0	0	1.88282e+06	3.20837e+07	0	0	0	0	1.4377e+06	0	0	0	0	1.28515e+06	3.333e+07	8.01093e+07	5.16656e+07	1.02239e+08	3.12709e+07	0	29256.1	2.61755e+06	0	0	16524.6	635209	1.88211e+06	3.57082e+07	7.20008e+07	6.71355e+07	1.92481e+07	0
1175	0	0	0	0	0	3.04964e+06	2.04934e+07	5.88189e+07	6.12528e+07	4.12576e+07	1218.67	0	60780.2	0	0	0	0	0	0	0	4.85436e+07	4.3433e+07	1.05337e+07	1.53415e+06	0	0	0	0	0	1155.16	1.41942e+07	4.99084e+06	9.03259e+07	3.17396e+07	5.80558e+06	159790
1176	0	0	0	0	0	0	0	0	0	0	0	0	0	0	0	0	0	0	0	0	3.09242e+06	2.75079e+07	5.47532e+06	0	0	0	0	0	0	629604	4.85041e+06	2.70362e+07	1.83808e+07	1.30219e+07	19633.8	0
1177	0	0	0	0	0	0	1151.02	2.88972e+06	3.55444e+07	2.59192e+06	0	0	0	0	0	0	0	0	3502.82	1.80128e+07	4.76384e+07	2.38788e+07	1.47764e+06	7588.43	0	0	0	0	0	16288.7	1.92642e+06	4.0383e+07	3.36451e+07	5.68224e+07	9.81443e+06	0
1178	0	0	0	0	2342.13	6.71742e+06	7.65008e+07	7.30392e+07	5.75283e+07	5.28978e+07	1.17663e+07	4.4464e+06	0	0	0	0	0	2.44497e+06	9.97896e+06	3.09464e+07	7.33287e+07	2.01007e+07	0	0	0	0	0	0	0	0	631130	2.76506e+07	2.22116e+07	5.53504e+07	1.14008e+07	0
1179	0	0	0	0	0	0	14001.9	1.99418e+07	5.69151e+07	3.19036e+07	75744.2	0	0	0	0	0	0	0	15087.5	0	0	0	0	0	0	0	0	0	2.44551e+06	2.6924e+07	3.39037e+07	4.61635e+07	8.91664e+07	6.27949e+07	10955.8	0
1180	0	0	0	0	0	16279.5	9.1832e+06	2.29091e+07	4.38036e+07	3.21625e+06	0	0	0	0	0	0	0	0	0	9.23996e+06	5.58154e+07	4.14192e+07	9.19116e+06	685654	0	0	0	0	0	0	4.32603e+07	8.58126e+07	1.06431e+08	6.58977e+07	1.91896e+07	32478.7
1181	0	0	0	0	0	0	13865.5	3.06795e+06	0	0	0	0	0	0	0	0	0	0	8.51308e+06	1.05116e+07	8.01214e+07	1.37599e+07	1.24145e+07	0	1.37436e+06	1.06137e+07	0	0	0	17441.6	8.43784e+06	3.88839e+07	9.3485e+07	9.18359e+07	8.56907e+06	0
1182	0	0	0	0	0	0	0	0	2.70619e+07	3.24795e+07	8.7553e+06	11283.3	0	0	0	0	0	1155.12	30161	2.89383e+07	5.57389e+07	4.43914e+07	662608	1133.62	0	0	0	0	0	0	0	1.12997e+07	5.72562e+07	1.3863e+07	0	0
1183	4.02874e+06	0	4.62313e+06	1073.77	15379.7	2.44487e+06	9.72081e+06	2.60012e+06	3.74027e+06	32801.8	76334	0	0	0	0	0	0	144204	2.72906e+07	6.42895e+07	5.73699e+07	9.58154e+07	3.50769e+07	1.07071e+07	0	0	0	0	0	0	0	1.19292e+07	8.34745e+06	3.17825e+07	0	0
1184	0	0	0	0	0	0	0	0	0	0	2.56097e+06	0	0	0	0	0	0	0	0	36322.3	3.42758e+07	2.32456e+07	1.31698e+07	761670	0	0	0	0	0	15109	9.93392e+06	2.56555e+07	6.19833e+07	6.3392e+07	3.18898e+06	0
1185	0	0	0	0	0	0	0	636641	0	0	0	0	2.24381e+06	0	0	0	0	8965	639368	1.57087e+07	6.44059e+07	6.31715e+07	1.06013e+07	1115.38	0	0	0	0	0	0	0	0	1.93515e+07	5.03317e+07	2.58382e+07	2.25403e+07
1186	0	0	0	0	0	0	1.86957e+06	5.66139e+06	1.21904e+07	5.72453e+06	0	0	0	0	0	0	0	0	632997	2.69655e+07	1.87127e+07	15844.7	9481.32	0	0	0	0	0	0	0	0	0	0	0	0	0
1187	60773.9	0	0	0	0	0	3505.48	4.92936e+06	3.75748e+06	18197.3	812825	0	0	0	0	0	0	0	10396.1	2.56062e+07	3.76844e+07	2.00394e+06	14592.3	0	3.86525e+06	7299.95	725913	4.98264e+06	0	645216	7.9177e+06	1.62654e+07	8.32012e+07	5.87974e+07	1.36633e+07	0
1188	0	0	0	0	0	0	642336	5.06978e+07	7.58958e+07	1.04071e+07	0	0	0	0	0	0	0	2.43372e+06	0	3.14493e+07	1.5917e+07	6.39197e+06	1.09025e+07	7591.54	0	0	0	0	0	0	1.83129e+07	5.46338e+07	5.23962e+07	9.31786e+07	6.33634e+07	2.05095e+07
1189	0	0	0	0	0	631209	3.08725e+06	4.47042e+07	0	0	0	0	0	0	0	0	9116.01	1.8929e+06	3.53433e+07	7.25601e+07	6.15596e+07	2.60221e+07	2.55237e+06	0	0	0	0	0	1173.71	7.95109e+06	2.76276e+07	7.39775e+07	2.23964e+07	1.2123e+08	2.52659e+07	0
1190	0	0	0	0	0	0	0	0	0	0	0	0	0	0	0	0	0	0	15084.6	638064	6.38945e+07	1.50083e+07	1.06488e+07	0	0	0	0	0	0	1155.05	0	24675.7	3.12579e+07	8.58872e+07	2.56934e+06	63725
1191	0	0	0	0	0	0	0	2.68425e+07	4.96238e+07	4.41281e+07	0	0	0	0	0	0	0	0	1.23243e+07	2.33739e+07	7.43136e+07	4.49817e+07	671498	15178.1	0	0	0	0	0	0	0	2.34691e+07	5.69198e+07	8.10463e+07	6.23689e+06	0
1192	0	0	0	0	0	0	0	3.81321e+06	2.12254e+07	3.45454e+07	1.77968e+07	177111	0	0	0	0	0	0	13933.3	7.96926e+06	4.94679e+07	1.91219e+07	1.92542e+07	7591.54	0	0	0	0	0	159998	2.8257e+07	6.95388e+07	9.56793e+07	3.40497e+07	1.42993e+06	0
1193	0	0	0	0	0	0	0	2335.89	5.76505e+06	6.18545e+07	1.00056e+07	1.48474e+06	0	0	0	0	0	0	0	0	1169.2	0	0	0	0	0	0	0	0	0	2.4252e+06	7059.72	5.09147e+06	0	0	0
1194	0	0	0	0	0	0	0	0	0	0	0	0	0	0	0	0	0	0	3.0528e+06	8.08469e+06	3.14997e+07	2.81691e+07	3.21035e+06	0	0	0	0	0	0	0	7.26075e+06	5.96518e+07	5.95679e+07	7.11014e+07	2.40858e+07	4.00711e+06
1195	0	0	0	0	0	631166	5.1164e+07	7.92795e+07	4.40726e+06	15781.1	0	0	0	0	0	0	0	0	3502.82	4.94016e+06	3.16385e+07	4.5017e+07	3689.09	0	0	0	0	0	0	0	0	0	0	0	0	0
1196	0	0	0	0	0	8960.52	1.83392e+07	5.25052e+07	6.36233e+07	892390	7306.37	0	4.00629e+06	1.43632e+06	12911.3	0	0	0	0	2.7022e+07	5.73469e+07	5.32272e+07	7.26477e+06	0	0	0	0	0	0	0	1.41528e+07	2.19433e+07	4.64808e+07	6.20787e+07	770147	0
1197	0	0	0	0	0	0	0	3.05618e+06	2.07911e+07	6.89202e+07	5.66662e+06	0	0	0	0	0	0	0	0	1.1889e+07	2.46419e+06	0	0	0	0	0	0	0	0	4.46559e+06	5.54019e+07	3.48652e+07	5.08514e+07	2.79839e+07	2.60735e+06	0
1198	0	0	0	0	0	0	0	7045.63	2.58748e+06	8.92423e+06	21894.1	1264.37	3707.49	0	0	0	0	0	1150.62	1.49998e+07	1.28921e+07	9.8523e+06	60500.6	0	0	0	0	0	0	639347	1.94499e+07	3.79339e+07	4.68926e+07	9.54735e+06	2.99736e+06	0
1199	0	0	0	0	0	0	0	0	0	0	0	0	0	0	0	0	0	0	0	1.55393e+07	7.35399e+07	5.87094e+07	4.04953e+07	1.07581e+07	0	0	0	0	0	15108.5	1.54669e+07	5.32834e+07	3.893e+07	6.51654e+07	4.17491e+06	0
1200	0	0	0	0	0	8.72258e+06	8.60431e+06	6.27338e+07	4.76412e+07	5.62464e+07	3691.95	0	0	0	0	0	0	0	10488.3	3.74535e+06	5.73166e+07	2.52878e+07	1.09718e+07	2.65236e+06	0	0	0	0	0	1154.83	2.45811e+06	2.25507e+07	2.4667e+07	20695	23293.4	0
1201	1105.61	0	0	0	0	0	0	7.40465e+06	7.45323e+06	0	0	0	0	0	0	0	0	0	7006.15	6.44727e+06	3502.1	0	0	0	0	0	0	0	1172.97	0	4.84656e+06	2.224e+07	3.44383e+07	8.21175e+06	2.56419e+06	0
1202	0	0	0	0	0	628646	3.03806e+06	2.6492e+07	0	0	0	0	0	0	0	0	0	0	0	0	0	0	0	0	0	0	0	0	0	627646	1.39643e+07	1.8774e+07	2.67944e+07	0	0	0
1203	0	0	0	0	0	630113	6.70507e+06	3.8218e+07	4.61521e+07	4.40943e+07	3.33798e+06	753003	0	0	0	0	0	16286.8	0	0	0	0	0	0	0	0	0	0	0	0	8.68318e+06	3.0997e+06	4.47922e+07	4.52982e+07	0	0
1204	0	0	0	0	0	0	0	0	0	0	0	0	0	0	0	0	0	3.69422e+06	5.09502e+07	1.09884e+08	6.71042e+07	3.26173e+07	134176	0	0	0	0	0	0	0	13998.8	1.49757e+07	4.16801e+07	657591	0	0
1205	0	0	0	0	0	0	0	0	0	1.47905e+06	0	0	0	0	0	0	0	0	0	2.46723e+06	4.38484e+06	3.90539e+06	0	0	0	0	0	0	0	0	20978	2.36025e+07	5.79965e+07	4.552e+07	3672.95	0
1206	0	0	0	0	0	17377.6	4.31187e+07	5.92042e+07	5.15634e+07	0	730451	0	0	0	0	0	0	0	14000.1	7060.34	3.76042e+07	1.41666e+07	0	0	1105.37	0	0	0	0	0	2.43825e+06	1.98207e+07	4.04385e+07	5.62929e+07	0	0
1207	0	0	0	0	0	0	0	2.71766e+07	6.19109e+07	0	0	0	0	0	0	0	0	0	0	0	0	0	0	0	0	0	0	0	0	0	3.05367e+06	4.95334e+06	0	0	0	0
1208	976455	0	0	0	0	1.90729e+06	14990.8	9085.87	2.48219e+06	0	3690.73	0	0	0	0	0	0	0	3.07646e+06	665317	1.27136e+06	3664.98	0	0	0	0	0	0	0	0	1.35239e+07	3.13531e+07	7.26072e+07	5.12364e+07	2.54254e+06	0
1209	0	0	0	0	4.96508e+06	4.22225e+07	7.06212e+07	5.24898e+07	0	0	0	0	0	0	0	0	0	628979	646357	6.99144e+07	7.30634e+07	6.24549e+07	3.34724e+07	23779.8	0	0	0	0	0	0	0	3.11181e+06	2.12413e+07	3.7983e+07	0	0
1210	0	0	0	0	0	0	38291.3	0	0	0	0	0	0	0	0	0	0	0	624158	7.54168e+06	6.78896e+07	15766.7	1.55161e+06	6.02871e+06	0	0	0	0	0	0	0	3.11562e+06	2.75239e+07	0	0	0
1211	0	0	0	0	0	0	0	0	0	0	0	0	0	0	0	0	0	0	0	0	0	0	0	0	14695	3691.85	0	0	0	0	0	0	10660.4	1.98009e+06	2.58506e+06	0
1212	0	0	0	0	0	0	9.94995e+06	1.62477e+07	0	0	0	0	1.46515e+06	3690.63	0	0	0	0	0	1.99641e+07	2.09365e+07	6.41655e+07	1.20033e+07	0	0	0	0	0	0	0	1.54082e+07	3.70029e+07	1.2316e+07	5.71227e+07	3.26372e+06	0
1213	0	0	0	0	0	628273	2.43763e+06	3.69591e+06	3.25697e+06	0	0	0	0	0	0	0	0	0	0	1.43392e+07	4.91107e+07	0	0	0	712661	0	0	0	0	0	0	16461.2	1.23557e+07	3.05834e+07	2.69999e+07	0
1214	0	0	0	0	0	0	0	0	0	0	0	0	0	0	0	0	0	643489	1.3986e+07	5.47994e+07	3.86089e+07	4.76196e+07	2.21867e+07	2.67335e+06	0	0	0	0	0	0	0	0	1.5845e+07	5.40996e+07	4.68095e+07	693445
1215	0	0	0	0	0	0	0	0	0	0	4.27428e+06	0	0	0	0	0	0	0	9.31599e+06	1.02407e+07	6.31126e+07	3.06138e+07	3.69193e+07	1.54605e+07	59906.8	0	0	0	0	143184	7.45233e+06	3.14622e+07	6.65087e+07	8.37781e+07	3.50489e+06	0
1216	0	0	0	0	0	0	0	0	0	17048.2	0	0	0	0	0	0	0	0	0	9086.77	0	0	0	0	0	0	0	0	1.27587e+06	3.15438e+06	4.09414e+07	7.1692e+07	5.02293e+07	7.75528e+07	2.71924e+07	0
1217	0	0	0	0	0	0	4.29868e+06	6.57023e+07	6.49272e+07	2.39269e+07	60508.5	0	0	0	0	0	0	0	0	0	0	0	0	0	0	0	0	0	0	629799	5.4477e+06	2.29906e+07	4.76299e+07	9.94202e+07	4.24315e+07	6.60749e+06
1218	0	0	0	0	0	0	0	0	0	0	0	0	0	0	0	0	0	0	0	38865.9	1.16396e+07	3.17752e+07	7328.94	27833.7	0	0	0	0	0	0	0	0	665910	1.9211e+07	0	0
1219	0	0	0	0	0	0	0	0	4.91926e+06	1.35619e+07	0	0	0	0	0	0	0	3.05989e+06	6.44518e+07	5.193e+07	5.09858e+07	1.54507e+07	5.81311e+06	11313.6	0	0	0	0	0	8961.71	1.33304e+07	2.28456e+07	6.02495e+07	2.40465e+07	1.41272e+07	4.03719e+06
1220	0	0	0	0	0	0	0	0	0	0	0	0	0	0	0	0	0	0	0	0	0	0	0	0	0	0	0	0	636445	5.56209e+06	2.73695e+07	9.16501e+07	7.85686e+07	4.86904e+07	151840	0
1221	0	0	0	0	0	0	0	0	0	0	0	0	0	0	0	0	0	0	6981.73	3.34598e+07	6.37808e+07	8.19142e+07	1.41234e+07	4.11751e+06	0	0	0	0	0	0	0	7046.67	3.08151e+06	1.2418e+07	663697	687046
1222	0	0	0	0	0	0	0	0	0	0	0	0	7.52269e+06	2.85107e+06	1.42507e+06	22626.7	2.46705e+06	4.32483e+06	2.21819e+07	7.20148e+07	5.53385e+07	3.65573e+07	2.56421e+06	2.65022e+06	0	0	0	0	0	0	1.10838e+07	1.58025e+07	4.92959e+07	3.33851e+07	3.90578e+06	0
1223	0	0	0	0	0	0	0	0	0	0	0	0	0	0	0	0	0	0	3.73881e+06	3.45754e+07	5.89029e+07	6.3566e+06	3692.57	0	0	0	0	0	0	0	0	0	3.06673e+06	2.41123e+07	0	0
1224	10991.2	0	0	0	0	2.42841e+06	2.61283e+07	6.84383e+07	1.04286e+08	5.8933e+07	4.03363e+07	2.97938e+07	0	0	0	0	0	0	0	8.76959e+06	1.50415e+07	0	0	0	0	0	0	0	0	0	0	9.24963e+06	2.92916e+07	31687	0	0
1225	0	0	0	0	0	0	627876	7049.57	7072.14	23165.9	3692.67	0	0	0	0	0	0	0	6948.3	2.54777e+06	3.08362e+07	7.1995e+07	4.96034e+07	9.7717e+06	0	0	0	0	0	0	0	0	1.90597e+07	26201.2	0	0
1226	0	0	0	0	0	0	7.32406e+06	5.30987e+07	5.89305e+07	0	0	0	0	0	0	0	0	0	0	1167.61	6.97337e+06	0	0	0	0	0	0	0	638817	3448.56	3.19007e+07	4.81572e+07	5.62458e+07	9.42153e+07	2.52489e+07	2.6584e+06
1227	0	0	0	0	0	0	0	0	0	0	0	0	10994.2	0	0	0	0	0	633956	1.4368e+07	6.24544e+07	4.52091e+07	3692.47	0	0	0	0	0	0	0	0	0	1.12798e+07	2.76007e+07	3688.89	0
1228	0	0	0	0	0	0	0	0	1171.75	0	0	0	0	0	0	0	0	0	2.41962e+06	1.83127e+07	7.26079e+07	0	0	0	0	0	0	0	638616	1.69277e+07	4.55845e+07	4.7026e+07	4.9367e+07	4.03731e+07	0	0
1229	0	0	0	0	0	0	30139	2.512e+07	0	0	0	0	0	0	0	0	0	3464.19	4.31244e+06	2.28309e+07	7.2653e+07	7.87525e+07	1.84565e+07	61430.9	0	0	0	0	0	627979	1.80327e+07	5.95961e+06	4.38973e+07	1.08116e+08	2.72591e+06	0
1230	0	0	0	0	0	3.05421e+06	1.83556e+07	5.70045e+07	2.00269e+07	2.5377e+06	0	0	0	0	0	0	0	0	0	2.5504e+06	1.3435e+07	1.68292e+07	1.76791e+07	11279.5	0	0	0	0	0	0	15065	1.51372e+07	3.02311e+07	8.41482e+07	2.45604e+07	0
1231	0	0	0	0	0	0	0	0	4.95166e+06	5.0594e+06	0	0	0	0	0	0	0	0	0	0	0	2.54083e+06	0	0	0	0	0	0	0	0	0	2.44936e+06	9.8556e+06	4.57809e+07	7319.62	0
1232	0	0	0	0	0	0	0	0	0	0	0	0	0	0	0	0	0	0	9.08183e+06	6.53484e+07	2.40401e+07	8.41651e+07	2.42868e+07	0	0	0	0	0	0	0	1.18427e+07	3492.6	0	0	0	0
1233	0	0	0	0	7074.01	0	0	0	0	0	0	0	0	0	0	0	0	0	0	0	0	2.55438e+06	0	0	0	0	0	0	0	0	0	0	0	0	0	0
1234	0	0	0	0	0	1.25397e+06	1.72919e+07	17563	0	0	0	0	0	0	0	0	0	0	628418	4.11496e+07	4.36025e+07	3.57943e+07	0	0	2.27008e+06	0	0	0	0	634372	9.59668e+06	4.29441e+07	4.65746e+07	2.96383e+07	0	0
1235	0	0	0	0	0	0	2.98892e+07	5.74607e+07	2.33316e+07	0	0	0	0	0	0	0	0	0	0	0	0	7262.67	0	0	49752.9	0	0	0	0	0	22086.1	8.9405e+06	6.43558e+07	6.63254e+07	97447.7	16528.3
1236	0	0	0	0	0	0	0	1.19414e+07	4.23507e+07	0	0	0	10991.5	0	0	0	0	0	1.70346e+07	6.62754e+07	4.14802e+07	3.155e+07	37273.7	0	0	0	0	0	0	657685	1.0822e+07	747119	0	0	0	0
1237	0	0	0	0	0	0	0	0	0	2.5412e+06	0	0	0	0	0	0	0	0	0	0	0	1208.32	1.43224e+06	0	0	0	0	0	0	0	3.20487e+06	0	4.49488e+07	2.38934e+07	3685.11	0
1238	0	0	0	0	0	0	0	2.46256e+06	5.64619e+06	1.39653e+07	0	0	0	0	0	0	0	0	0	0	1.47314e+07	0	0	0	732238	0	0	0	0	0	3504.05	4.92504e+06	3.86058e+07	4.35985e+07	2.23854e+06	0
1239	0	0	0	0	0	0	0	0	0	0	0	0	0	0	0	0	0	1155.09	1.3762e+07	5.72546e+07	0	0	0	0	0	0	0	0	0	0	0	38778	4.71327e+07	6.48185e+07	1.23947e+07	0
1240	0	0	0	0	0	0	0	10593.7	649316	0	0	0	0	0	0	0	0	0	9.94817e+06	2.39563e+07	2.14781e+07	0	0	0	0	0	0	0	0	0	4.30201e+06	4.85513e+07	9.62738e+07	5.86007e+07	0	0
1241	0	0	0	0	0	0	0	0	0	0	0	0	0	0	0	0	0	0	0	0	2.47177e+06	32775.4	0	0	0	0	0	0	0	18595.8	693947	3.93604e+07	7.8738e+07	7.15755e+07	3.58791e+07	0
1242	0	0	0	0	0	0	0	8172.15	3.86128e+07	2.5588e+06	0	0	0	0	0	0	0	1.2583e+06	3.13185e+07	6.83136e+07	6.17277e+07	5.12162e+07	4.1506e+07	6.28737e+06	0	0	0	0	0	0	7.20616e+06	2.27247e+07	1.32517e+07	6.3037e+07	2.78455e+07	33104.5
1243	0	0	0	0	0	0	0	0	0	0	0	0	0	0	0	0	0	0	1.89464e+06	1.67892e+07	7.98474e+07	7.69156e+07	3.52528e+07	1.80128e+07	0	0	0	0	0	0	0	0	0	0	0	0
1244	0	0	0	0	0	0	5.39946e+06	2.26562e+07	7.95209e+06	1.33231e+07	663661	0	121491	0	0	0	0	16289.3	0	0	0	0	0	0	0	0	0	3.79513e+06	0	0	1.35195e+07	2.03082e+07	5.66019e+07	7.11082e+07	6.28023e+06	1259.05
1245	0	0	0	0	0	0	8.70796e+06	16455.8	0	0	0	0	0	0	0	0	0	0	0	1.27179e+07	4.35657e+07	1.01938e+07	657277	0	0	0	0	0	0	0	0	0	0	3.8625e+06	3683.78	0
1246	0	0	0	0	0	643046	6.07163e+06	2.46234e+06	1.78431e+07	2.98468e+07	0	0	0	0	0	0	0	0	0	0	0	0	0	0	0	0	0	0	0	1.27181e+06	2.13718e+07	6.17741e+06	0	0	0	0
1247	0	0	0	0	0	0	0	0	636132	0	0	0	0	10945.3	3626.56	0	7082.91	16241.1	2.09996e+07	1.38279e+07	3.15674e+07	2.54289e+06	0	0	0	0	0	0	0	0	0	0	3.77713e+06	2.84549e+07	78359.3	0
1248	0	0	0	0	0	0	0	0	0	0	0	0	0	0	0	0	0	0	2.77024e+07	4.20989e+07	6.4037e+07	2.94849e+07	5.49603e+06	731838	2.30368e+06	70204.8	0	0	0	0	666324	1.12165e+07	2.89345e+07	5.93281e+07	5.66552e+07	4.21895e+07
1249	0	0	0	0	0	0	0	0	0	0	0	0	0	0	0	0	0	0	0	0	0	0	0	0	0	0	0	0	0	0	38302	6.61329e+07	7.65664e+07	5.12529e+07	1.49969e+07	3790.46
1250	0	0	0	0	0	0	0	0	0	0	0	0	0	1100.75	0	0	0	0	0	655405	2.95851e+07	2.55671e+06	71359.9	0	0	0	0	0	0	0	0	0	638910	5.75506e+06	4.00756e+06	0
1251	705017	0	0	0	0	0	0	0	0	0	0	0	0	0	0	0	0	0	4.87034e+06	8.85964e+06	657998	0	0	0	0	0	0	0	0	0	0	31788.7	1.71854e+07	3.12232e+07	8.78176e+06	767141
1252	0	0	0	0	0	0	0	0	0	0	0	0	0	0	0	0	0	0	0	1.06504e+07	4.04078e+07	3.23953e+07	5.84451e+06	0	0	0	0	0	0	0	0	2.47379e+06	3.46718e+07	9.75996e+07	3.04174e+07	1.01783e+07
1253	0	0	0	0	0	0	0	2.2836e+07	9.28982e+06	1.72867e+07	8.6046e+06	752782	0	0	0	0	0	0	0	0	0	0	3689.3	0	0	0	0	0	0	0	0	0	3.08922e+06	654455	0	0
1254	0	0	0	0	0	0	0	0	0	0	0	0	0	0	0	0	0	10110.9	1.03432e+07	4.47518e+07	5.27381e+07	32547.8	0	0	0	0	0	0	0	0	1.27603e+06	2.64063e+07	6.85313e+07	1.07046e+08	3.3933e+07	0
1255	0	0	0	0	0	0	0	0	3.0813e+07	2.59355e+07	0	0	0	0	0	0	0	0	1.80374e+07	2.95283e+07	1.1897e+07	2.65236e+06	0	0	0	0	0	0	0	0	0	0	8297.5	1.02781e+07	0	0
1256	0	0	0	0	0	0	0	9.40751e+06	4.31307e+07	4.00365e+07	9461.92	3819.27	0	0	0	0	0	0	0	1.19119e+07	3.87326e+06	3667.64	0	0	7361.87	0	0	0	0	0	15123.9	2.36176e+07	6.42333e+07	8.18267e+07	2.55771e+07	9.64609e+06
1257	0	0	0	0	0	0	0	0	2.46271e+06	0	701568	0	0	0	0	0	0	0	0	1.00762e+07	3.42956e+07	3.7931e+07	0	0	0	0	0	0	0	0	0	3.1297e+06	3.37749e+07	8.25735e+07	69772.1	0
1258	0	0	0	0	0	0	0	649187	1.94655e+06	2.51178e+07	0	0	0	0	0	0	0	0	636095	2.56291e+07	6.18448e+07	1.0711e+08	2.8421e+07	2.23326e+07	0	0	0	0	0	0	2.4246e+06	1.67675e+07	4.36689e+07	5.74954e+06	1.05133e+07	753022
1259	0	0	0	0	0	0	0	0	0	0	0	0	0	0	0	0	0	0	10511.6	2.9179e+07	7.96189e+07	3.49913e+07	42269.6	0	0	0	0	0	0	1.26365e+06	2.68848e+07	3.57075e+06	1.81828e+07	5.57306e+07	0	0
1260	0	0	0	0	0	0	0	15308.5	2.73987e+07	4.85697e+07	24068.1	0	0	10944.8	0	0	0	16272.7	0	0	0	0	0	0	7367.67	2.57147e+06	701030	14318.4	0	0	0	7059.1	3.74141e+06	1.35441e+06	2.28102e+06	0
1261	0	0	0	0	0	0	0	652588	2339.99	5.06799e+06	7382.38	0	0	741118	0	0	0	0	0	2.45152e+06	637817	0	0	0	0	0	0	0	0	0	0	3.12121e+06	2.68908e+07	9.19368e+06	3690.42	0
1262	0	0	0	0	0	0	657055	2.34713e+07	1.87449e+07	4.52785e+07	0	0	0	0	0	0	0	0	8.67241e+06	3.00999e+07	637974	0	0	0	7369.95	0	0	0	0	1.39598e+06	8.45879e+06	3.0183e+07	3.59499e+07	7.47255e+07	184113	0
1263	0	0	0	0	0	0	0	0	3.73816e+06	1.31346e+07	2.41226e+07	7590.3	0	0	0	0	0	0	0	1.90495e+06	4.0685e+07	5.84576e+07	9.03286e+06	3.65205e+06	0	0	0	0	0	0	7002.78	677899	2.48244e+07	7.58588e+07	4.06965e+06	0
1264	0	0	0	0	0	0	0	8.8345e+06	2.91791e+07	2.81367e+07	60499.1	724099	0	0	0	0	0	0	0	0	0	0	0	0	60759.7	0	0	0	0	0	17498.1	2.82566e+07	4.8131e+07	7.4628e+07	3.06421e+07	5.39447e+06
1265	0	0	0	0	0	0	0	0	0	0	0	0	0	0	0	0	0	0	1.27921e+06	4.3522e+06	0	657983	0	0	0	0	0	0	9118.4	0	24492.1	1.11022e+07	5.19345e+07	1.01468e+08	5.34166e+07	2.65984e+07
1266	0	0	0	0	0	0	0	4.4019e+06	2.624e+06	1.66918e+07	0	0	0	0	0	0	0	0	0	2.45806e+06	30685.3	9.17744e+06	0	0	0	0	0	0	0	154158	1.21189e+07	2.78666e+07	6.45776e+07	5.2022e+07	0	0
1267	0	0	0	0	0	2.3805e+07	3.79059e+07	8.40603e+07	8.12994e+07	3.16937e+06	0	0	0	0	0	0	0	0	23164.7	5.23358e+07	7.46333e+07	3.81976e+07	16928.1	77350.1	0	0	0	0	0	0	14004.1	2.4757e+06	5.57399e+06	0	0	0
1268	2.87392e+06	0	0	0	0	0	0	0	0	0	0	0	0	0	0	0	0	0	3.04551e+06	3.55875e+07	1.9145e+07	0	15960	0	0	0	0	0	0	0	0	0	3562.8	1.34141e+06	0	0
1269	0	0	0	0	0	0	0	0	0	0	0	0	0	0	0	0	0	0	0	1.04506e+07	3.86189e+07	5.23032e+06	1179.36	0	0	0	0	0	0	0	13970.1	3.17451e+07	6.04982e+07	6.69011e+07	1.85524e+07	2.18399e+07
1270	0	0	0	0	0	0	0	0	0	2.54566e+06	0	0	0	0	0	0	0	0	1.26521e+06	6.21177e+06	6.30337e+07	1.99301e+07	0	0	0	0	0	0	0	0	1.85923e+07	2.53406e+07	6.97728e+06	5.0997e+07	1.47625e+07	0
1271	0	0	0	0	0	0	641555	25836.3	4.66264e+07	6.43105e+07	8.64688e+06	0	0	0	0	0	0	0	0	0	1.7734e+07	3.30938e+06	0	0	0	0	0	0	0	0	0	10536.2	2.20962e+07	2.89439e+07	0	0
1272	0	0	0	0	0	0	2.15916e+07	1.67925e+07	5.33812e+07	1.38859e+07	0	62481.2	0	0	0	0	0	0	0	0	34991.8	2.8854e+07	662765	0	0	0	0	0	0	0	2.45216e+06	3.66847e+07	3.02015e+07	8.36148e+07	1.97303e+07	0
1273	0	0	0	0	0	0	0	1160.81	9.51366e+06	2.55193e+06	10939.4	0	0	0	0	0	0	0	0	0	3.1044e+06	2.60579e+06	0	0	0	0	0	0	0	0	0	10563.4	2.13765e+07	4.70053e+07	2.52199e+06	0
1274	0	0	0	0	0	0	0	0	0	0	0	0	0	0	0	0	0	0	2.42317e+06	4.39482e+06	5.05831e+06	3.22494e+07	0	0	0	0	1.41009e+06	0	0	0	31372.4	2.83126e+07	4.72956e+07	4.22607e+07	8.12972e+06	0
1275	0	0	0	0	0	0	0	635446	3.78576e+06	5.11438e+07	2.3855e+07	4.5931e+06	0	0	0	0	0	0	0	3.7514e+06	1.2351e+07	2.04832e+07	0	0	0	0	0	0	0	0	1.41736e+07	4.25966e+07	1.78391e+07	6.54474e+07	4.00229e+06	0
1276	0	0	0	0	0	0	0	3.10057e+06	0	0	0	0	0	0	0	0	0	0	6940.43	2.56601e+07	6.66626e+07	6.65259e+07	9.26599e+06	0	0	0	0	0	0	0	0	9.27802e+06	2.54141e+07	2.80367e+07	7.71561e+06	0
1277	0	0	0	0	0	0	1.11207e+07	2.13286e+07	6.67308e+07	6.68977e+07	1.08616e+07	2.98828e+06	0	0	0	0	0	0	0	0	0	0	0	0	0	0	0	0	0	771703	8.52834e+06	2.22977e+07	5.2316e+07	1.00794e+08	1.26787e+07	0
1278	2.63333e+06	0	0	0	0	646341	1.44562e+07	0	7072.14	0	0	0	0	0	0	0	0	0	627934	4.3965e+06	2.56546e+07	1.44492e+07	0	0	0	0	0	0	0	2.05447e+06	3.65798e+07	3.31163e+07	1.00064e+08	9.95631e+07	5.29767e+07	3.75565e+06
1279	0	0	0	0	0	0	0	0	0	0	0	0	0	0	0	0	0	0	4.90967e+06	5.49983e+06	15346.7	657591	0	0	0	0	0	0	0	0	7.31159e+06	4.12024e+07	4.34855e+07	2.00354e+06	0	0
1280	0	0	0	0	0	0	2.58492e+06	2.16684e+07	6.00532e+07	1.16634e+07	729953	0	0	0	0	0	0	0	0	0	2.4788e+06	3.96877e+06	7329.36	0	0	0	0	0	0	0	27972.3	1.29907e+07	2.67057e+07	9.00988e+07	3.91825e+07	2.09185e+07
[truncated: 1,719 more rows]

## Sheet: Figure5abc_data_full
Unnamed: 0	Baseline	Baseline.1	Baseline.2	Baseline.3	Baseline.4	Baseline.5	Baseline.6	Baseline.7	Baseline.8	Baseline.9	Baseline.10	Baseline.11	Baseline.12	Baseline.13	Baseline.14	Baseline.15	Baseline.16	Baseline.17	Baseline.18	Baseline.19	Baseline.20	Baseline.21	Baseline.22	Baseline.23	Baseline.24	Baseline.25	Baseline.26	Baseline.27	Baseline.28	Baseline.29	Baseline.30	Baseline.31	Baseline.32	Baseline.33	Baseline.34	Baseline.35	Baseline.36	Baseline.37	Baseline.38	Baseline.39	Baseline.40	Baseline.41	Baseline.42	Baseline.43	Baseline.44	Baseline.45	Baseline.46	Baseline.47	Baseline.48
[truncated: 31 more rows]
[truncated: 251 more columns]

[truncated: 13 more sheets: Figure5abc_data_pcts, Figure5d_data, Figure5d_data_pcts, Figure5e_data, Figure6a_data, Figure6b_data, Figure6c_data, Figure7_data, Figure8a_data, Figure8b_data, Figure9a_data, Figure9b_data, Figure9c_data]
